# Supplementary material for: Estimating daily salt intake based on 24 h urinary sodium excretion in adults aged 18–69 years in Shandong, China
Source: PubMed Central journal article supplement — BMJ Open. 2014 Jul 18;4(7):e005089. doi: 10.1136/bmjopen-2014-005089 (PMC4120319; doi:10.1136/bmjopen-2014-005089), 2014-07-18
Supplement: bmjopen-2014-005089.draft_revisions.pdf [file bmjopen-2014-005089.draft_revisions.pdf]

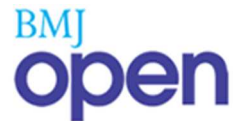

**Estimating daily salt intake based on 24h urinary sodium excretion among adults aged 18–69 years in Shandong, China**

|                                 |                                                                                                                                                                                                                                                                                                                                                                                                                                                                                                                                                                                                                                                                                                                                                                                                                                                                       |
|---------------------------------|-----------------------------------------------------------------------------------------------------------------------------------------------------------------------------------------------------------------------------------------------------------------------------------------------------------------------------------------------------------------------------------------------------------------------------------------------------------------------------------------------------------------------------------------------------------------------------------------------------------------------------------------------------------------------------------------------------------------------------------------------------------------------------------------------------------------------------------------------------------------------|
| Journal:                        | <i>BMJ Open</i>                                                                                                                                                                                                                                                                                                                                                                                                                                                                                                                                                                                                                                                                                                                                                                                                                                                       |
| Manuscript ID:                  | bmjopen-2014-005089                                                                                                                                                                                                                                                                                                                                                                                                                                                                                                                                                                                                                                                                                                                                                                                                                                                   |
| Article Type:                   | Research                                                                                                                                                                                                                                                                                                                                                                                                                                                                                                                                                                                                                                                                                                                                                                                                                                                              |
| Date Submitted by the Author:   | 19-Feb-2014                                                                                                                                                                                                                                                                                                                                                                                                                                                                                                                                                                                                                                                                                                                                                                                                                                                           |
| Complete List of Authors:       | Zhang, Ji-Yu; Shandong Center for Disease Prevention and Control<br>Yan, Liuxia; National Center for Chronic and Non-communicable Disease Control and Prevention,<br>Tang, Junli; Shandong Center for Disease Prevention and Control<br>Ma, Jixiang; National Center for Chronic and Non-communicable Disease Control and Prevention,<br>Guo, Xiaolei; Shandong Center for Disease Prevention and Control<br>Zhao, Wenhua; Chinese Center for Disease Control and Prevention,<br>Zhang, Xiaofei; Department of Clinical Epidemiology and Biostatistics, Second Affiliated Hospital of Zhejiang University College of Medicine,<br>Li, Jianhong; National Center for Chronic and Non-communicable Disease Control and Prevention,<br>Chu, Jie; Shandong Center for Disease Prevention and Control<br>Bi, zhenqiang; Shandong Center for Disease Prevention and Control |
| <b>Primary Subject Heading</b>: | Public health                                                                                                                                                                                                                                                                                                                                                                                                                                                                                                                                                                                                                                                                                                                                                                                                                                                         |
| Secondary Subject Heading:      | Epidemiology                                                                                                                                                                                                                                                                                                                                                                                                                                                                                                                                                                                                                                                                                                                                                                                                                                                          |
| Keywords:                       | Hypertension < CARDIOLOGY, EPIDEMIOLOGY, NUTRITION & DIETETICS                                                                                                                                                                                                                                                                                                                                                                                                                                                                                                                                                                                                                                                                                                                                                                                                        |
|                                 |                                                                                                                                                                                                                                                                                                                                                                                                                                                                                                                                                                                                                                                                                                                                                                                                                                                                       |

SCHOLARONE™  
Manuscripts

1  
2  
3 **Estimating daily salt intake based on 24h urinary sodium excretion among adults**  
4  
5 **aged 18–69 years in Shandong, China**  
6  
7

8 *Corresponding Author:*  
9

10 Dr. Zhen-qiang BI

11 Shandong Center for Disease Control and Prevention

12 16992# Jingshi RD., Jinan, Shandong, PR of China 250014

13 TEL: 0086-531-82679601

14 FAX: 0086-531-82679620

15 E: [bizhenqiang@gmail.com](mailto:bizhenqiang@gmail.com)  
16  
17  
18  
19  
20  
21  
22  
23  
24  
25  
26

27 Authors: Ji-yu ZHANG<sup>1</sup>, Liu-xia YAN<sup>2</sup>, Jun-li TANG<sup>1</sup>, Ji-xiang MA<sup>2</sup>, Xiao-lei GUO<sup>1</sup>,  
28 Wen-hua ZHAO<sup>3</sup>, Xiao-fei ZHANG<sup>4</sup>, Jian-hong Li<sup>2</sup>, Jie Chu<sup>1</sup>, Zhen-qiang BI<sup>1\*</sup>  
29  
30  
31

32 Affiliations:

- 33  
34  
35 1. Shandong Center for Disease Control and Prevention, 250014 Jinan, China  
36  
37 2. National Center for Chronic and Non-communicable Disease Control and Prevention  
38 Chinese Center for Disease Control and Prevention, 100050 Beijing, China,  
39  
40  
41 3. Chinese Center for Disease Control and Prevention, 102206 Beijing, China  
42  
43  
44 4. Department of Clinical Epidemiology and Biostatistics, Second Affiliated Hospital of  
45 Zhejiang University College of Medicine, 310009 Hangzhou, China  
46  
47  
48

49 TABLES: 4

50 FIGURES: 0

51 SUPPLEMENTARY: 0

52  
53  
54  
55  
56  
57  
58  
59  
60  
WORD COUNT: 1906

1  
2  
3 KEY WORDS: Salt, sodium, 24-hour urine, cardiovascular disease, China  
4  
5  
6  
7  
8  
9  
10  
11  
12  
13  
14  
15  
16  
17  
18  
19  
20  
21  
22  
23  
24  
25  
26  
27  
28  
29  
30  
31  
32  
33  
34  
35  
36  
37  
38  
39  
40  
41  
42  
43  
44  
45  
46  
47  
48  
49  
50  
51  
52  
53  
54  
55  
56  
57  
58  
59  
60

For peer review only

## ABSTRACTS

**Background:** In 2011, China's National Health and Family Planning Commission and Shandong (population 96 million) Provincial Government launched the SMASH Project to prevent and control hypertension. This study estimates the daily salt intake among adult Shandong population (aged 18-69) during 2011 on 24h urinary sodium excretion.

**Methods:** In 2011, a cross-sectional survey was conducted with a random sample of 2061 adults aged 18–69 years in Shandong. A 24h urine sample was collected from each participant. All urine samples were tested at the ADICON Clinical Laboratory for Na and creatinine content. Daily salt intake was estimated based on the 24-hour urinary sodium excretion assuming that all sodium ingested was in the form of sodium chloride. Data are expressed as means and 95% confidence intervals (CIs).

**Results:** The mean excretion of Na over 24h was 237.61 (95%CI: 224.77-250.44) Mmol. Overall, the estimated salt intake was on average 13.90 (95%CI: 13.15-14.65) g/day. The mean intake was higher among rural residents (14.00g) than among urban residents (13.68g); and was higher among men (14.40g) compared to women (13.37g). About 96% of survey participants had a salt dietary intake of 6g or more per day.

**Conclusion:** Salt intake in Shandong is alarmingly high with a great majority (96%) of adults consuming more than currently recommended (6g/d). There is an urgent need to develop and implement effective interventions to reduce the intake level to combat the increasing burden of noncommunicable diseases.

### Strengths and limitations

The National China Nutrition Surveys (1982, 1992, and 2002) and the Chinese Behavioral Risk Factor Surveillance calculated salt intake in Chinese adults, and the

1  
2  
3 results indicated that about 80% of the Chinese exceeded the Chinese Nutritional  
4 Society's (2007) recommended salt (sodium chloride) intake upper level of 6 gram/day.  
5  
6  
7  
8 In 2002, the average daily salt intake was 12.6 gram in Shandong Province. However, the  
9  
10 salt intake from the above surveys was estimated by FFQ or dietary recall, and the salt  
11  
12 intake volumes calculated might be high or low. The method of salt intake based on 24h  
13  
14 urinary sodium excretion was applied in the other researches in China, but the number of  
15  
16 the sample was small and not well representative for Chinese aged 18-69 years. In this  
17  
18 study, 2184 subjects were investigated and 2061 urine specimens were collected by  
19  
20 multi-stage cluster sampling which was used to select a provincially representative.  
21  
22  
23 Based on 24h urinary sodium excretion, the exact salt intake in Chinese aged 18-69 years  
24  
25 was estimated relatively. The present study indicates that the intake of Na is very high in  
26  
27 a representative Chinese adults aged 18-69 years. This paper suggests that population salt  
28  
29 reduction campaign is a must in China. The results also provided the 24h urinary sodium  
30  
31 in Chinese aged 18-69 years for other studies.  
32  
33  
34

35  
36 The sample only included Chinese aged 18-69 years, so the results are not extrapolated to  
37  
38 other groups. The 24h urinary excretion method does not account for electrolyte loss  
39  
40 other than via the kidneys, and therefore will tend to slightly underestimate the true  
41  
42 intake.  
43  
44  
45  
46  
47  
48  
49  
50  
51  
52  
53  
54  
55  
56  
57  
58  
59  
60

## BACKGROUND

In China, hypertension is a major contributor to cardiovascular disease, which accounts for 40% of the deaths [1], and 23% of the health care costs [2]. Evidence suggests a high level of salt intake is associated with high blood pressure and a greater risk of stroke and CVD [3-6]. The National China Nutrition Surveys (1982, 1992, and 2002) and the Chinese Behavioral Risk Factor Surveillance indicated that about 80% of the Chinese exceeded the Chinese Nutritional Society's (2007) recommended salt (sodium chloride) intake upper level of 6 gram/day. In 2010, the estimated average salt intake of Chinese citizens was 9.1 grams/day in urban areas, and 11.5 grams/day in rural areas [1]. The Chinese diet is high in sodium.

Reducing population salt intake is one of the easiest, more efficient and cost-effective ways to reduce the burden of CVD and save health care costs, and this would result in a major improvement in public health [1,7]. Internationally, calls have been made for dietary sodium reduction to be a major intervention for prevention and control of non-communicable diseases [8]. Many countries, including Japan, the United Kingdom, Finland, Portugal, and the United States, have reduced population-wide sodium intake [9-11]. China, a major challenge to sodium intake reduction effort, in contrast to western countries, is that majority of sodium comes from home cooking, not commercially processed foods. A recent study suggested that most dietary sodium (76%) in China was from salt added in home cooking [12]. In contrast, processed foods contributed heavily to sodium intake in the UK (95%), and the US (71%)[12]. To prevent and control hypertension and improve health, efforts to remove excess sodium from diets in China should focus on reducing sodium in home cooking.

1  
2  
3 Shandong Province is one of the most populous provinces in China. Sodium intake by  
4  
5 most Shandong residents considerably exceeds the recommended limit. In 2002, the  
6  
7 average daily salt intake was 12.6 gram, and the prevalence of hypertension was 25.1%.  
8  
9 High-salt intake has caused huge economic loss [2]. To reduce sodium in the Chinese diet,  
10  
11 in 2011, the Chinese Ministry of Health (MOH) selected Shandong province as a national  
12  
13 pilot area for sodium reduction and the Shandong MOH Action on Salt and Hypertension  
14  
15 (SMASH) Project was formed. In order to help develop effective interventions for the  
16  
17 SMASH Project, in 2011, a base-line survey was conducted to assess the salt  
18  
19 consumption, and the prevalence of hypertension among the Shandong residents. The  
20  
21 measurement of 24h urinary Na excretion is considered the ‘gold standard’ method for  
22  
23 obtaining data of Na intakes in population surveys [1]. But in China, there is few research  
24  
25 results on salt intake of general population based on 24h urinary Na excretion. This study  
26  
27 analyzes this baseline survey to estimate the daily amount of dietary salt intake among  
28  
29 the general adult Shandong population (aged 18-69) based on 24h urinary sodium  
30  
31 excretion and to prepare for public health measures and to enable later monitoring and  
32  
33 evaluation of the strategy.  
34  
35  
36  
37  
38  
39

## 40 41 **METHODS**

42  
43 During June to July, 2011, a cross-sectional survey was conducted in Shandong province.  
44  
45 Multi-stage (4-stage) cluster sampling was used to select a provincially representative  
46  
47 sample of the adult population (aged 18-69). Briefly, a total of 140 counties/districts in  
48  
49 Shandong province were stratified by geographic distribution (Eastern, Central Southern,  
50  
51 and North Western), and by residence (urban versus rural). Twenty counties/districts were  
52  
53 selected (12 counties and 8 districts). Using a proportional probability sampling (PPS)  
54  
55  
56  
57  
58  
59  
60

1  
2  
3 method, three townships (in rural areas) or two streets (in urban areas) were selected from  
4  
5 each selected county or district. Also using PPS, 1 village/neighborhood was selected  
6  
7 from each sampled township/street. In every selected village/neighborhood, 42 subjects  
8  
9 were selected by random sampling. A total of 2184 subjects were sampled.  
10

11  
12 A face to face, close-ended questionnaire was administered by trained public health  
13  
14 professionals, all of whom had previous experience in conducting interviews in similar  
15  
16 health surveys. Questions collected information on: demographics (gender, age,  
17  
18 education, income).  
19

20  
21 A single timed 24 hour urine collection was obtained for estimation of electrolyte  
22  
23 excretion. All subjects were asked to provide 24-hour urine samples. The participants  
24  
25 were given written and verbal instructions for the 24-hour urine collection. The first urine  
26  
27 of the day was discarded and all urine over the following 24 hours was collected in the  
28  
29 bottles provided. The urine volume was measured, the sample was carefully mixed, and  
30  
31 an aliquot of 20 ml was taken. Aliquots were immediately frozen to -20°C and were sent  
32  
33 to the laboratory.  
34  
35

36  
37 The sodium concentration was determined by direction selective electrode method and  
38  
39 creatinine concentration was determined by picric acid method in ADICON Clinical  
40  
41 Laboratory which is CAP accredited lab in China. Urine volume less than 500 milliliter  
42  
43 or creatinine less than 3.81 mmol (mean-2SD: day/weight(kg)) for men and 4.57 mmol  
44  
45 (mean-2SD: day/weight(kg)) for women were considered insufficient to ensure the  
46  
47 completeness of urine. Inaccurate urine collections and extreme outliers for urinary  
48  
49 creatinine were excluded for the analysis. Daily salt intake was estimated based on  
50  
51 calculation of 24-hour urinary sodium excretion on the assumption that all sodium  
52  
53  
54  
55  
56  
57  
58  
59  
60



1  
2  
3 ingested was in the form of sodium chloride.  
4

5  
6 Physical measurements taken in all subjects included: height, weight, waist  
7  
8 circumference. Of 2184 subjects, 2061 subjects with complete data were included for this  
9  
10 analysis (response rate 94.4%).  
11

12  
13 The survey received ethical approval from the Ethics Committee of the Shandong Center  
14  
15 for Disease Control and prevention, and participants provided written informed consent  
16  
17 to participate in this study.  
18

19  
20 Educational level and annual household income were used as indicators for social  
21  
22 economic status (SES). We divided participants into five groups by education level: no  
23  
24 education, primary school, junior high school, senior high school, or any college and  
25  
26 above. Annual household income level was classified in high, middle, and low, according  
27  
28 to tertiles.  
29

30  
31 Statistical analyses were performed with Statistical Analysis System (SAS), version 9.3  
32  
33 (SAS Institute, Inc).  $P < 0.05$  was considered significant. All the results shown were  
34  
35 weighted by the total demography in Shandong province. Survey weight (total  
36  
37 weight=design weight  $\times$  post-stratification weight) was applied to calculate weighted  
38  
39 proportions. Design weight was calculated to account for different factors, including  
40  
41 cluster design, strata, and individual. The population data of Shandong province was used  
42  
43 to generate post-stratification weight. Means and CI were calculated for all variables and  
44  
45 the normality of the data was checked. Differences were tested by using analysis of  
46  
47 variance and Chi-square test.  
48  
49  
50  
51  
52  
53  
54  
55  
56  
57  
58  
59  
60

## RESULTS

### Study subjects

A total of 2061 urine was eligible for the analysis and 51 were excluded. There was no significant between including samples and excluding samples on age, gender and urban or rural ( $t=1.31$ ,  $p>0.05$ ; Chi-square =0.14,  $p>0.05$ ; Chi-square =0.12,  $p>0.05$ ). ( table 1 ).

The characteristics of each subpopulation studied are summarized in Table 2. Among the 2061 eligible samples, there were 1076 men (52.21%) and 985 women (47.79%). The average age was 41.23 years, average height was 163.00cm, average BMI was 24.22 kg/m<sup>2</sup>. There were no significant differences in age and BMI between males and females( $t=0.34$ ,  $P>0.05$ ;  $t=0.29$ ,  $P>0.05$ ). But, height of males was significantly higher than females ( $t=37.65$ ,  $P<0.05$ ). The prevalence of overweight and obese was respectively 33.72% and 18.00%. There were no significant difference between males and females (Chi-square=0.90,  $P>0.05$ ; Chi-square=0.001, $P>0.05$ ). The income of 82.90% residents was less than 10000 RMB. 42.60% residents had junior high degree of education level.

### Salt intake

The 24h urinary sodium ranged from 22.05 mmol to 750.79 mmol, the median was 231.10 mmol, Q3 was 258.44mmol, and Q1 was 180.87mmol.

Table3 and table4 show that 24h urinary sodium excretion and estimated daily salt intake for each subpopulation. The mean excretion of Na over 24h was 237.61 mmol (95%CI: 224.77-250.44 mmol), respectively corresponding to 13.90g NaCl (95%CI: 13.15-14.65g). The mean of salt intake by rural residents (14.00g) was more than urban residents (13.68g). Salt intake in men (14.40g) was higher than in women (13.37g). There

1  
2  
3 was not obvious difference among age groups.  
4

## 5 6 **DISCUSSION**

7  
8 It can be very hard to estimate Na intake accurately. Certainly, it is very difficult to know  
9 the exact amount of salt added during cooking (even in restaurants) and at the table.  
10  
11 Further, it is hard to know how much salt has been left on the plate, and it can be very  
12 hard to determine the salt content in food and drinking-water over time [1]. Thus, in  
13 agreement with numerous authors [3,1,13], the best way to determine salt intake is  
14 probably via the amount excreted in 24 h urine. There have been very few studies on salt  
15 intake via 24h urine sodium in China and none has been performed in a sample  
16 representative of the Chinese population as a whole. Longjian LIU et al. reported an  
17 intake of 188.4mmol/d (corresponding 11.02g) NaCl in a population of 48–56 year olds  
18 in China [14], a result much smaller than that obtained in the present study  
19 (224.77mmol/24h, 13.9g). The present study indicates that the intake of Na is very high  
20 in a representative group of Shandong adults. It is higher than the UK population aged  
21 19-64 years in 2008 (148 mmol)[15]. Salt intake by men and women are respectively  
22 246.23 mmol/24h and 228.52 mmol/24h, they are higher than by the population in  
23 Toyama [11] (Male: 224 mmol/24h; Female: 201mmol/24h) [16] and by the US [17]  
24 (Male: 180-190 mmol/24h; Female:130-150 mmol/24h) and UK [17] (Male: 161  
25 mmol/24h; Female: 127 mmol/24h).  
26  
27  
28  
29  
30  
31  
32  
33  
34  
35  
36  
37  
38  
39  
40  
41  
42  
43  
44  
45  
46  
47

48 It is in fact double the recommended intake of not more than 80–110 mmol Na/d (5–6 g  
49 salt/d) issued by WHO in 1982 [18] and since then adopted in the China Nutrition  
50 Recommendations [19]. In China, salt intake is higher, mainly owed to the high  
51 consumption of soya sauce and the custom of adding a lot of salt to food (both during  
52  
53  
54  
55  
56  
57  
58  
59  
60

1  
2  
3 cooking and at the table) [3,20,21]. As reported in most of the studies, salt intake in men  
4  
5 (14.4g) was higher than in women (13.9g) in Shandong, perhaps because of their overall  
6  
7 higher food intakes and differences in food habits [3,20,22]. In the vast majority of  
8  
9 populations, salt intake is high and well above recommended daily intakes. During taking  
10  
11 the national basic public health service, it is very important to add the contents about salt  
12  
13 reduction and to change the habit of high salt intake, like persuading patients to give up  
14  
15 smoking.  
16  
17  
18

19  
20 There is strong and consistent evidence from animal studies, clinical trials and  
21  
22 epidemiological data both within and across populations implicating high salt intake as an  
23  
24 important risk factor for high BP among both hypertensive and normotensive individuals;  
25  
26 high salt intake is also associated with increased risk of future CHD and stroke. Given the  
27  
28 health problems, such as hypertension [23] and CVD [24], associated with excessive salt  
29  
30 intake, it would appear that public health initiatives are needed to reduce its consumption  
31  
32 [3,4] and consequently lower CVD burden and increase life expectancy. Government is in  
33  
34 charge of health education and promotion for salt reduction, a media campaign to  
35  
36 increase public awareness. There is therefore the opportunity for timely community based,  
37  
38 context-specific initiatives to limit the amount of salt added to food by individuals. It is  
39  
40 necessary to engage with restaurant to reduce the large amount of salt commonly  
41  
42 included in dish. Increasing westernization of cultures, it is also essential to encourage  
43  
44 low levels of salt content in processed foods. Such public health approaches can be  
45  
46 simple, low-cost and effective. Indeed, such a campaign is underway in Shandong,  
47  
48 promoted by the Shandong government and China MOH (Shandong & MOH Action on  
49  
50 Salt and Hypertension, SMASH). The results of the present study may be useful in its  
51  
52  
53  
54  
55  
56  
57  
58  
59  
60

endeavors.

### **Acknowledgments**

The authors would like to thank all the investigators from national, Shandong provincial and county level CDC and all participants of the survey.

### **Contributors**

Conceived and designed the experiments: Jiyu Zhang, Liuxia Yan, Junli Tang, Zhenqiang Bi. Performed the experiments: Jiyu Zhang, Junli Tang, Zhenqiang Bi. Analyzed the data: Jiyu Zhang, Junli Tang, Zhenqiang Bi. Contributed reagents/materials/analysis tools: Jiyu Zhang, Jixiang Ma, Xiaolei Guo, Wen-hua Zhao, Xiaofei Zhang, Jianhong Li, Jie Chu. Wrote the paper: Jiyu Zhang, Liuxia Yan, Junli Tang, Zhenqiang Bi.

### **Funding**

The survey was supported by funds from Chinese Center for Disease Control and Prevention (China CDC), National Center for Non-communicable and Chronic Disease Control and Prevention (NCNCD, China CDC), the Technical Development Plan in Shandong ( implemented by Shandong CDC, Grant number: 2012GSF11828).

### **Competing interests**

None declared

**Ethics approval** The survey received ethical approval from the Ethics Committee of the Shandong Center for Disease Control and prevention, China.

**Data sharing statement:** No additional data available.

## REFERENCES

1. Ministry of Health. (2010) Annual Report on Health Statistics. Beijing: Peking Union Medical College Publishing House.
2. China CDC & China News. (2011) Salt reduction and hypertension prevention. China
3. Brown IJ, Tzoulaki I, Candeias V, et al. (2009) Salt intakes around the world: implications for public health international. *J Epidemiol* 38, 791–813.
4. He FJ, MacGregor GA. (2009) A comprehensive review on salt and health and current experience of worldwide salt reduction programs. *J Hum Hypertens* 23, 363–384.
5. Hoffmann IS, Cubeddu LX. (2009) Salt and the metabolic syndrome. *Nutr Metab Cardiovasc Dis* 19, 123–128.
6. Strazzullo P, D’Elia L, Kandala NB, et al. (2009) Salt intake, stroke and cardiovascular disease: meta-analysis of prospective studies. *BMJ* 339, b4567.
7. Bibbins-Domingo K, Chertow GM, Coxson PG, et al. (2010) Projected effect of dietary salt reductions on future cardiovascular disease. *N Engl J Med* 362, 590–599.
9. Beaglehole R, Bonita R, Horton R, et al. (2011) Priority actions for the non-communicable disease crisis. *Lancet* 377: 1438-1447.
10. Chan WG. Salt reduction initiatives in developed countries and lessons for China: a systematic review. Available at <http://hdl.handle.net/10722/145711>. Accessed 15 August 2012.
11. Centers for Disease Control and Prevention. (2012) CDC Grand Rounds: Dietary sodium reduction-time for choice. *MMWR*: 61(05), 89-91.
12. Anderson CA, Appel LJ, Okuda N, et al. (2010) Dietary source of sodium in China, Japan, the United Kingdom, the United States, women and men aged 40 to 59 years: the

- 1  
2  
3 INTERMAP study. *Journal of the American Dietetic Association* 110(5): 736-745.  
4  
5  
6 13. Hunter D. (1998) Biochemical indicators of dietary intake. In *Nutritional*  
7  
8 *Epidemiology*, pp. 174–243 [W Willett, editor]. Oxford: Oxford University Press.  
9  
10  
11 14. Longjian LIU, Katsumi IKEDA, and Yukio YAMORI. (2000) Twenty-four Hour  
12  
13 *Urinary Sodium and 3-Methylhistidine Excretion in Relation to Blood pressure in*  
14  
15 *Chinese: Results from the China-Japan Cooperative Research for the WHO-CARDIAC*  
16  
17 *study. Hypertens Res* 23, 152-157.  
18  
19  
20 15. National Centre for Social Research. An assessment of dietary sodium levels among  
21  
22 *adults (aged 19–64) in the UK general population in 2008, based on analysis of dietary*  
23  
24 *sodium in 24 hour urine samples. UK: Food Standards Agency, 2008.*  
25  
26  
27 16. Rose G, Stamler J. The INTERSALT Study: background, methods and main results. *J*  
28  
29 *Hum Hypertens* 1989;3:283–88.  
30  
31  
32 17. Stamler J, Elliott P, Chan Q, for the INTERMAP Research Group (2003b).  
33  
34 *INTERMAP appendix tables. J Hum Hypertens*, 17:655–775.  
35  
36  
37 18 WHO Expert Committee (1982) *Prevention of Coronary Heart Disease. WHO*  
38  
39 *Technical Report Series no. 678. Geneva: WHO.*  
40  
41  
42 19. Chinese Nutrition Society (2007). *The Dietary Guidelines for Chinese Residents. Tibet,*  
43  
44 *China: Tibetan People's Publishing House, 55.*  
45  
46 20. Zhou BF, Stamler J, Dennis B, et al. (2003) INTERMAP Research Group Nutrient  
47  
48 *intakes of middle-aged men and women in China, Japan, United Kingdom, and United*  
49  
50 *States in the late 1990s: the INTERMAP Study. J Hum Hypertens* 17, 623–630.  
51  
52  
53 21. Liu L, Liu L, Ding Y, et al. (2001) Ethnic and environmental differences in various  
54  
55 *markers of dietary intake and blood pressure among Chinese Han and three other*  
56  
57  
58  
59  
60

1  
2  
3 minority peoples of China: results from the WHO Cardiovascular Diseases and  
4 Alimentary Comparison (CARDIAC) Study. *Hypertens Res Clin Exp* 24, 315–322.  
5  
6

7  
8 22. Hoffmann IS & Cubeddu LX (2009) Salt and the metabolic syndrome. *Nutr Metab*  
9 *Cardiovasc Dis* 19, 123–128.  
10  
11

12  
13 23. Luft FC (1998) Salt and hypertension at the close of the millenium. *Wien Klin*  
14 *Wochenschr* 110, 459–466.  
15  
16

17  
18 24. Hooper L, Bartlett C, Davey Smith G, et al. (2003) Reduced dietary salt for  
19 prevention of cardiovascular disease. *The Cochrane Database of Systematic Reviews*  
20 2003, issue 3 CD003656.  
21  
22  
23  
24  
25  
26  
27  
28  
29  
30  
31  
32  
33  
34  
35  
36  
37  
38  
39  
40  
41  
42  
43  
44  
45  
46  
47  
48  
49  
50  
51  
52  
53  
54  
55  
56  
57  
58  
59  
60



**Table 1 Test of goodness of fit between including and excluding study population**

| Gender | Age-group | Including sample |       |       |       |       |       | Excluding sample |       |       |       |       |       |
|--------|-----------|------------------|-------|-------|-------|-------|-------|------------------|-------|-------|-------|-------|-------|
|        |           | Total            |       | Urban |       | Rural |       | Total            |       | Urban |       | Rural |       |
|        |           | n                | %     | n     | %     | n     | %     | n                | %     | n     | %     | n     | %     |
| Male   | 18-29     | 281              | 13.63 | 85    | 4.12  | 196   | 9.51  | 15               | 29.41 | 6     | 11.76 | 9     | 17.65 |
|        | 30-39     | 276              | 13.39 | 91    | 4.42  | 185   | 8.98  | 6                | 11.76 | 0     | 0     | 6     | 11.76 |
|        | 40-49     | 204              | 9.9   | 65    | 3.15  | 139   | 6.74  | 1                | 1.96  | 1     | 1.96  | 0     | 0     |
|        | 50-59     | 162              | 7.86  | 51    | 2.47  | 111   | 5.39  | 2                | 3.92  | 0     | 0     | 2     | 3.92  |
|        | 60-69     | 153              | 7.42  | 50    | 2.43  | 103   | 5     | 4                | 7.84  | 0     | 0     | 4     | 7.84  |
|        | Subtotal  | 1076             | 52.21 | 342   | 16.59 | 734   | 35.61 | 28               | 54.9  | 7     | 13.73 | 21    | 41.18 |
| Female | 18-29     | 252              | 12.23 | 79    | 3.83  | 173   | 8.39  | 10               | 19.61 | 3     | 5.88  | 7     | 13.73 |
|        | 30-39     | 244              | 11.84 | 79    | 3.83  | 165   | 8.01  | 4                | 7.84  | 1     | 1.96  | 3     | 5.88  |
|        | 40-49     | 190              | 9.22  | 59    | 2.86  | 131   | 6.36  | 2                | 3.92  | 0     | 0     | 2     | 3.92  |
|        | 50-59     | 164              | 7.96  | 53    | 2.57  | 111   | 5.39  | 3                | 5.88  | 2     | 3.92  | 1     | 1.96  |
|        | 60-69     | 135              | 6.55  | 41    | 1.99  | 94    | 4.56  | 4                | 7.84  | 2     | 3.92  | 2     | 3.92  |
|        | Subtotal  | 985              | 47.79 | 311   | 15.09 | 674   | 32.7  | 23               | 45.1  | 8     | 15.69 | 15    | 29.41 |
| Total  | 18-29     | 533              | 25.86 | 164   | 7.96  | 369   | 17.9  | 25               | 49.02 | 9     | 17.65 | 16    | 31.37 |
|        | 30-39     | 520              | 25.23 | 170   | 8.25  | 350   | 16.98 | 10               | 19.61 | 1     | 1.96  | 9     | 17.65 |
|        | 40-49     | 394              | 19.12 | 124   | 6.02  | 270   | 13.1  | 3                | 5.88  | 1     | 1.96  | 2     | 3.92  |
|        | 50-59     | 326              | 15.82 | 104   | 5.05  | 222   | 10.77 | 5                | 9.8   | 2     | 3.92  | 3     | 5.88  |
|        | 60-69     | 288              | 13.97 | 91    | 4.42  | 197   | 9.56  | 8                | 15.69 | 2     | 3.92  | 6     | 11.76 |
|        | Subtotal  | 2061             | 100   | 653   | 31.68 | 1408  | 68.32 | 51               | 100   | 15    | 29.41 | 36    | 70.59 |

Table 2 Personal characteristics of the study sample by sex and age

|                               | Total(n=2061) |       |        | Male(n=1076) |       |        | Female(n=985) |       |        |
|-------------------------------|---------------|-------|--------|--------------|-------|--------|---------------|-------|--------|
|                               | Mean          | SD    | Median | Mean         | SD    | Median | Mean          | SD    | Median |
| <b>Age(years)</b>             | 41.23         | 13.99 | 39.00  | 41.12        | 14.32 | 39.00  | 41.34         | 13.62 | 39.00  |
| <b>Height(cm)</b>             | 163.00        | 8.84  | 162.60 | 168.78       | 7.02  | 169.20 | 157.27        | 6.23  | 157.20 |
| <b>BMI (kg/m<sup>2</sup>)</b> | 24.53         | 3.90  | 24.22  | 24.55        | 3.90  | 24.25  | 24.51         | 3.90  | 24.15  |
| <b>Overweight (%)</b>         |               | 33.72 |        |              | 34.67 |        |               | 32.69 |        |
| <b>Obese (%)</b>              |               | 18.00 |        |              | 18.03 |        |               | 17.97 |        |
| <b>Income (Yuan,%)</b>        |               |       |        |              |       |        |               |       |        |
| <5000                         |               | 52.24 |        |              | 51.1  |        |               | 53.45 |        |
| 5000-                         |               | 30.66 |        |              | 31.4  |        |               | 29.87 |        |
| 10000-                        |               | 8.35  |        |              | 8.27  |        |               | 8.44  |        |
| 15000-                        |               | 5.45  |        |              | 5.64  |        |               | 5.25  |        |
| 20000-                        |               | 3.29  |        |              | 3.57  |        |               | 2.99  |        |
| <b>Education (%)</b>          |               |       |        |              |       |        |               |       |        |
| illiteracy                    |               | 13.79 |        |              | 7.72  |        |               | 20.43 |        |
| junior                        |               | 19.09 |        |              | 17.58 |        |               | 20.73 |        |
| junior high                   |               | 42.06 |        |              | 47.72 |        |               | 35.87 |        |
| senior                        |               | 15.15 |        |              | 16.84 |        |               | 13.31 |        |
| junior college or<br>above    |               | 9.91  |        |              | 10.14 |        |               | 9.65  |        |

**Table3 Urinary sodium excretion of Shandong adults aged 18-69 in 2011**  
(Weighted mean, 95% CI, mmol/24h)

| Gender        | Age-group | Urban |        |               | Rural |        |               | Total |        |               |
|---------------|-----------|-------|--------|---------------|-------|--------|---------------|-------|--------|---------------|
|               |           | N     | Mean   | 95% CI        | N     | Mean   | 95% CI        | N     | Mean   | 95% CI        |
| <b>Male</b>   | 18-29     | 85    | 241.64 | 194.77 288.51 | 196   | 244.81 | 222.52 267.10 | 281   | 243.88 | 225.17 262.58 |
|               | 30-39     | 91    | 255.88 | 224.25 287.50 | 185   | 247.19 | 225.21 269.17 | 276   | 249.99 | 233.30 266.69 |
|               | 40-49     | 65    | 233.33 | 187.35 279.31 | 139   | 247.90 | 230.99 264.82 | 204   | 243.59 | 227.72 259.47 |
|               | 50-59     | 51    | 263.00 | 230.28 295.71 | 111   | 251.36 | 222.78 279.95 | 162   | 255.27 | 235.02 275.52 |
|               | 60-69     | 50    | 239.00 | 201.12 276.88 | 103   | 232.24 | 203.69 260.79 | 153   | 234.42 | 213.36 255.49 |
|               | Subtotal  | 342   | 246.81 | 214.77 278.85 | 734   | 245.96 | 227.38 264.55 | 1076  | 246.23 | 231.49 260.96 |
| <b>Female</b> | 18-29     | 79    | 200.77 | 166.40 235.14 | 173   | 225.93 | 209.51 242.35 | 252   | 219.01 | 204.66 233.37 |
|               | 30-39     | 79    | 236.43 | 213.31 259.54 | 165   | 234.70 | 212.94 256.46 | 244   | 235.27 | 220.01 250.53 |
|               | 40-49     | 59    | 236.92 | 203.65 270.18 | 131   | 231.88 | 204.25 259.52 | 190   | 233.46 | 213.24 253.69 |
|               | 50-59     | 53    | 213.23 | 186.91 239.54 | 111   | 245.28 | 219.48 271.09 | 164   | 234.73 | 216.01 253.45 |
|               | 60-69     | 41    | 200.29 | 171.42 229.15 | 94    | 221.79 | 204.32 239.26 | 135   | 215.48 | 201.88 229.07 |
|               | Subtotal  | 311   | 219.97 | 196.66 243.29 | 674   | 232.32 | 214.85 249.79 | 985   | 228.52 | 215.67 241.37 |
| <b>Total</b>  | 18-29     | 164   | 222.94 | 195.56 250.32 | 369   | 235.72 | 218.46 252.98 | 533   | 232.08 | 218.89 245.26 |
|               | 30-39     | 170   | 246.19 | 220.85 271.54 | 350   | 241.06 | 220.44 261.68 | 520   | 242.73 | 227.75 257.71 |
|               | 40-49     | 124   | 235.11 | 204.10 266.11 | 270   | 240.30 | 220.05 260.56 | 394   | 238.72 | 223.37 254.07 |
|               | 50-59     | 104   | 238.44 | 219.05 257.83 | 222   | 248.32 | 227.36 269.27 | 326   | 245.03 | 230.70 259.37 |
|               | 60-69     | 91    | 220.68 | 188.80 252.56 | 197   | 226.94 | 207.45 246.43 | 288   | 225.01 | 209.89 240.14 |
|               | Subtotal  | 653   | 233.82 | 208.36 259.28 | 1408  | 239.30 | 222.28 256.33 | 2061  | 237.61 | 224.77 250.44 |

Table 4 Salt intake of Shandong adults aged 18-69 in 2011

(Weighted mean, 95%CI, grams/24h)

| Gender        | Age-group | Urban |       |             | Rural |       |             | Total |       |             |
|---------------|-----------|-------|-------|-------------|-------|-------|-------------|-------|-------|-------------|
|               |           | N     | Mean  | 95%CI       | N     | Mean  | 95%CI       | N     | Mean  | 95%CI       |
| <b>Male</b>   | 18-29     | 85    | 14.14 | 11.39 16.88 | 196   | 14.32 | 13.02 15.63 | 281   | 14.27 | 13.17 15.36 |
|               | 30-39     | 91    | 14.97 | 13.12 16.82 | 185   | 14.46 | 13.17 15.75 | 276   | 14.62 | 13.65 15.60 |
|               | 40-49     | 65    | 13.65 | 10.96 16.34 | 139   | 14.50 | 13.51 15.49 | 204   | 14.25 | 13.32 15.18 |
|               | 50-59     | 51    | 15.39 | 13.47 17.30 | 111   | 14.70 | 13.03 16.38 | 162   | 14.93 | 13.75 16.12 |
|               | 60-69     | 50    | 13.98 | 11.77 16.20 | 103   | 13.59 | 11.92 15.26 | 153   | 13.71 | 12.48 14.95 |
|               | Subtotal  | 342   | 14.44 | 12.56 16.31 | 734   | 14.39 | 13.30 15.48 | 1076  | 14.40 | 13.54 15.27 |
| <b>Female</b> | 18-29     | 79    | 11.75 | 9.73 13.76  | 173   | 13.22 | 12.26 14.18 | 252   | 12.81 | 11.97 13.65 |
|               | 30-39     | 79    | 13.83 | 12.48 15.18 | 165   | 13.73 | 12.46 15.00 | 244   | 13.76 | 12.87 14.66 |
|               | 40-49     | 59    | 13.86 | 11.91 15.81 | 131   | 13.57 | 11.95 15.18 | 190   | 13.66 | 12.47 14.84 |
|               | 50-59     | 53    | 12.47 | 10.93 14.01 | 111   | 14.35 | 12.84 15.86 | 164   | 13.73 | 12.64 14.83 |
|               | 60-69     | 41    | 11.72 | 10.03 13.41 | 94    | 12.97 | 11.95 14.00 | 135   | 12.61 | 11.81 13.40 |
|               | Subtotal  | 311   | 12.87 | 11.50 14.23 | 674   | 13.59 | 12.57 14.61 | 985   | 13.37 | 12.62 14.12 |
| <b>Total</b>  | 18-29     | 164   | 13.04 | 11.44 14.64 | 369   | 13.79 | 12.78 14.80 | 533   | 13.58 | 12.81 14.35 |
|               | 30-39     | 170   | 14.40 | 12.92 15.89 | 350   | 14.10 | 12.90 15.31 | 520   | 14.20 | 13.32 15.08 |
|               | 40-49     | 124   | 13.75 | 11.94 15.57 | 270   | 14.06 | 12.87 15.24 | 394   | 13.97 | 13.07 14.86 |
|               | 50-59     | 104   | 13.95 | 12.81 15.08 | 222   | 14.53 | 13.30 15.75 | 326   | 14.33 | 13.50 15.17 |
|               | 60-69     | 91    | 12.91 | 11.05 14.77 | 197   | 13.28 | 12.14 14.42 | 288   | 13.16 | 12.28 14.05 |
|               | Subtotal  | 653   | 13.68 | 12.19 15.17 | 1408  | 14.00 | 13.00 15.00 | 2061  | 13.90 | 13.15 14.65 |

# BMJ Open

## Estimating daily salt intake based on 24h urinary sodium excretion among adults aged 18–69 years in Shandong, China

|                                 |                                                                                                                                                                                                                                                                                                                                                                                                                                                                                                                                                                                                                                                                                                                                                                                                                                                                       |
|---------------------------------|-----------------------------------------------------------------------------------------------------------------------------------------------------------------------------------------------------------------------------------------------------------------------------------------------------------------------------------------------------------------------------------------------------------------------------------------------------------------------------------------------------------------------------------------------------------------------------------------------------------------------------------------------------------------------------------------------------------------------------------------------------------------------------------------------------------------------------------------------------------------------|
| Journal:                        | <i>BMJ Open</i>                                                                                                                                                                                                                                                                                                                                                                                                                                                                                                                                                                                                                                                                                                                                                                                                                                                       |
| Manuscript ID:                  | bmjopen-2014-005089.R1                                                                                                                                                                                                                                                                                                                                                                                                                                                                                                                                                                                                                                                                                                                                                                                                                                                |
| Article Type:                   | Research                                                                                                                                                                                                                                                                                                                                                                                                                                                                                                                                                                                                                                                                                                                                                                                                                                                              |
| Date Submitted by the Author:   | 30-May-2014                                                                                                                                                                                                                                                                                                                                                                                                                                                                                                                                                                                                                                                                                                                                                                                                                                                           |
| Complete List of Authors:       | Zhang, Ji-Yu; Shandong Center for Disease Prevention and Control<br>Yan, Liuxia; National Center for Chronic and Non-communicable Disease Control and Prevention,<br>Tang, Junli; Shandong Center for Disease Prevention and Control<br>Ma, Jixiang; National Center for Chronic and Non-communicable Disease Control and Prevention,<br>Guo, Xiaolei; Shandong Center for Disease Prevention and Control<br>Zhao, Wenhua; Chinese Center for Disease Control and Prevention,<br>Zhang, Xiaofei; Department of Clinical Epidemiology and Biostatistics, Second Affiliated Hospital of Zhejiang University College of Medicine,<br>Li, Jianhong; National Center for Chronic and Non-communicable Disease Control and Prevention,<br>Chu, Jie; Shandong Center for Disease Prevention and Control<br>Bi, zhenqiang; Shandong Center for Disease Prevention and Control |
| <b>Primary Subject Heading</b>: | Public health                                                                                                                                                                                                                                                                                                                                                                                                                                                                                                                                                                                                                                                                                                                                                                                                                                                         |
| Secondary Subject Heading:      | Epidemiology                                                                                                                                                                                                                                                                                                                                                                                                                                                                                                                                                                                                                                                                                                                                                                                                                                                          |
| Keywords:                       | Hypertension < CARDIOLOGY, EPIDEMIOLOGY, NUTRITION & DIETETICS                                                                                                                                                                                                                                                                                                                                                                                                                                                                                                                                                                                                                                                                                                                                                                                                        |
|                                 |                                                                                                                                                                                                                                                                                                                                                                                                                                                                                                                                                                                                                                                                                                                                                                                                                                                                       |

SCHOLARONE™  
Manuscripts

1  
2  
3 **Estimating daily salt intake based on 24-hour urinary sodium excretion in adults**  
4  
5  
6 **aged 18–69 years in Shandong, China**  
7

8 *Corresponding Author:*  
9

10 Dr. Zhen-qiang BI

11 Shandong Center for Disease Control and Prevention

12  
13 16992# Jingshi RD., Jinan, Shandong, PR of China250014

14  
15  
16  
17 TEL: 0086-531-82679601

18  
19  
20 FAX: 0086-531-82679620

21  
22  
23 E-mail: [bizhenqiang@gmail.com](mailto:bizhenqiang@gmail.com)  
24  
25  
26

27 Authors: Ji-yu ZHANG<sup>1</sup>, Liu-xia YAN<sup>2</sup>, Jun-li TANG<sup>1</sup>, Ji-xiang MA<sup>2</sup>, Xiao-lei GUO<sup>1</sup>,

28  
29 Wen-hua ZHAO<sup>3</sup>, Xiao-fei ZHANG<sup>4</sup>, Jian-hong Li<sup>2</sup>, Jie Chu<sup>1</sup>, Zhen-qiang BI<sup>1\*</sup>  
30  
31

32 Affiliations:  
33

34  
35 1. Shandong Center for Disease Control and Prevention, 250014 Jinan, China

36  
37 2. National Center for Chronic and Non-communicable Disease Control and Prevention

38  
39 Chinese Center for Disease Control and Prevention, 100050 Beijing, China,  
40

41  
42 3. Chinese Center for Disease Control and Prevention, 102206 Beijing, China

43  
44 4. Department of Clinical Epidemiology and Biostatistics, Second Affiliated Hospital of  
45  
46 Zhejiang University College of Medicine, 310009 Hangzhou, China  
47

48  
49 TABLES: 4

50  
51 FIGURES: 0

52  
53 SUPPLEMENTARY: 0

54  
55  
56 WORD COUNT: 1906  
57  
58  
59  
60

1  
2  
3 KEY WORDS: Salt, sodium, 24-hour urine, cardiovascular disease, China  
4  
5  
6  
7  
8  
9  
10  
11  
12  
13  
14  
15  
16  
17  
18  
19  
20  
21  
22  
23  
24  
25  
26  
27  
28  
29  
30  
31  
32  
33  
34  
35  
36  
37  
38  
39  
40  
41  
42  
43  
44  
45  
46  
47  
48  
49  
50  
51  
52  
53  
54  
55  
56  
57  
58  
59  
60

For peer review only

**ABSTRACT**

**Objective:** To estimate the daily salt intake in the adult Shandong population (aged 18–69 years) in 2011 based on 24-h urinary sodium excretion in China.

**Setting:** Twenty counties/districts by geographic distribution (Eastern, Central Southern, and North Western) and residence (urban versus rural), Shandong, China.

**Participants:** We randomly selected 2184 adults and obtained usable 24 h urine samples from 2061. Urine volume <500 mL or creatinine level <3.81 mmol (mean-2SD: day/weight (kg)) for men and 4.57 mmol (mean-2SD: day/weight (kg)) for women were considered deficient to ensure the completeness of the urine sample. Inaccurate urine collections and extreme outliers for urinary creatinine level were excluded from the analysis.

**Results:** The mean sodium level excreted over 24 h was 237.61 mmol (95% CI: 224.77–250.44)mmol. Overall, the estimated mean salt intake was 13.90 g/day (95% CI: 13.15–14.65). The mean salt intake by rural residents was more than that of urban residents (14.00 g vs 13.68 g;  $p<0.01$ ). Salt intake in men was higher than that in women (14.40 g vs 13.37 g;  $p<0.01$ ). Approximately 96% of the survey participants had a dietary salt intake of  $\geq 6$  g/day.

**Conclusion:** The salt intake in Shandong is alarmingly higher than the current recommended amount (6 g/day). Thus, effective interventions to reduce the salt intake levels to combat the increasing burden of non-communicable diseases need to be developed and implemented.



### Strengths and limitations

The gold standard 24-h urinary sodium excretion was used to estimate salt intake with standard checks for completeness of the specimens based on urine volume and the level of urine creatinine excreted. A limitation of this study is that the sample only comprised Chinese adults aged 18–69 years; hence, the results cannot be extrapolated to other groups.; The 24-h urinary sodium excretion method does not account for electrolyte loss via routes other than the kidneys, and therefore will tend to slightly underestimate the true amount of salt intake.

## BACKGROUND

In China, hypertension is a major contributor to cardiovascular disease (CVD), which accounts for 40% of the deaths [1] and 23% of the health care costs [2]. Evidence suggests that a high level of salt intake is associated with high blood pressure (BP) and a greater risk of stroke and CVD [3–6]. The National China Nutrition Surveys (1982, 1992, and 2002) and the Chinese Behavioral Risk Factor Surveillance indicated that approximately 80% of Chinese individuals consumed more than the maximum salt (sodium chloride) intake of 6 g/day recommended by the Chinese Nutritional Society (2007). In 2010, the estimated mean salt intake among the Chinese was 9.1 g/day in urban areas, and 11.5 g/day in rural areas [1]. The Chinese diet is high in sodium.

Reducing salt intake is one of the easiest, most efficient, and cost-effective ways to reduce the burden of CVD and health care costs, which would result in a major improvement in public health [1, 7]. Globally, dietary sodium reduction has been recommended as a major intervention method for the prevention and control of non-communicable diseases [8]. Several countries including Japan, the United Kingdom (UK), Finland, Portugal, and the United States (US), have succeeded in reducing the population-wide sodium intake [9–11]. In contrast to Western countries, a major challenge to the efforts to reduce sodium intake is that a majority of sodium comes from the salt added to home cooked food rather than in commercially processed foods. A recent study suggested that most of the dietary sodium (76%) in China could be traced to the salt added during home cooking [12]. In contrast, processed foods contributed heavily to sodium intake in the UK (95%) and the US (71%) [12]. To prevent and control

1  
2  
3 hypertension and improve health, efforts to remove excess sodium from diet in China  
4  
5 should focus on reducing the sodium level in home cooked food.  
6  
7

8  
9  
10 Shandong Province is one of the most populous provinces in China. Sodium intake by  
11  
12 most Shandong residents considerably exceeds the recommended limit. In 2002, the  
13  
14 mean daily salt intake was 12.6 g and the prevalence of hypertension was 25.1%. High  
15  
16 salt intake has caused huge economic loss [2]. In 2011, the Chinese Ministry of Health  
17  
18 (MOH) selected Shandong province as a national pilot area and the Shandong MOH  
19  
20 Action on Salt and Hypertension (SMASH) Project was set up to reduce the sodium level  
21  
22 in the Chinese diet. To help develop effective interventions for the SMASH Project, a  
23  
24 baseline survey was conducted in 2011 to assess salt consumption and the prevalence of  
25  
26 hypertension among the residents in Shandong. The measurement of 24-h urinary sodium  
27  
28 excretion is considered the gold standard method for obtaining data on the sodium intake  
29  
30 in population surveys [1]. However, in China, few studies have been conducted on the  
31  
32 salt intake of the general population based on the 24-h urinary sodium excretion method.  
33  
34 This study analyses the baseline survey to estimate the daily intake of dietary sodium  
35  
36 among the general adult Shandong population (aged 18–69 years) based on 24-h urinary  
37  
38 sodium excretion, establish public health measures, and enable later monitoring and  
39  
40 evaluation of the strategy.  
41  
42  
43  
44  
45  
46  
47  
48  
49

## 50 51 **METHODS**

52  
53 A cross-sectional survey was conducted in Shandong province from June 2011 to July  
54  
55 2011. Multi-stage (four-stage) cluster sampling was used to select a provincially  
56  
57  
58  
59  
60

1  
2  
3 representative sample of the adult population (aged 18–69 years). Briefly, a total of 140  
4  
5 counties/districts in Shandong province were stratified by geographic distribution  
6  
7 (Eastern, Central Southern, and North Western) and residence (urban versus rural).  
8  
9  
10 Twenty counties/districts were selected (12 counties and 8 districts). Using a proportional  
11  
12 probability sampling (PPS) method, three townships (in rural areas) or two streets (in  
13  
14 urban areas) were chosen from each selected county or district. The PPS method was also  
15  
16 used to select one village/neighbourhood from each sampled township/street. Random  
17  
18 sampling was used to select 42 subjects from each chosen village/neighbourhood. A total  
19  
20 of 2184 subjects were sampled.  
21  
22  
23

24  
25  
26  
27 Trained public health professionals with experience in conducting interviews for similar  
28  
29 health surveys administered a face-to-face, close-ended questionnaire. The questions  
30  
31 were used to collect information on demographics (gender, age, education, and income).  
32  
33  
34

35  
36 A single, timed 24-h urine collection was performed for the estimation of electrolyte  
37  
38 excretion. All subjects were asked to provide 24-h urine samples, for which they were  
39  
40 given written and verbal instructions. The first urine of the day was discarded and all  
41  
42 urine collected over the following 24 h was collected in bottles that were provided. The  
43  
44 urine volume was measured, the sample was carefully mixed, and a 20 mL aliquot was  
45  
46 withdrawn. Aliquots were immediately frozen at -20°C and sent to the laboratory for  
47  
48 analysis.  
49  
50  
51

52  
53  
54  
55 The sodium concentration was determined by the direction selective electrode method.  
56  
57  
58  
59  
60

1  
2  
3 Creatinine concentration was determined using the picric acid method (ADICON Clinical  
4 Laboratory; CAP accredited). Urine volume <500 mL or creatinine level <3.81 mmol  
5  
6 (mean-2SD: day/weight (kg)) for men and 4.57 mmol (mean-2SD: day/weight (kg)) for  
7  
8 women were considered deficient to ensure the completeness of the urine sample.  
9  
10 Inaccurate urine collections and extreme outliers for urinary creatinine level were  
11  
12 excluded from the analysis. Daily salt intake was estimated by assessing 24-h urinary  
13  
14 sodium excretion based on the assumption that all sodium was ingested in the form of  
15  
16 sodium chloride.  
17  
18  
19  
20  
21  
22  
23

24 Height, weight, and waist circumference were measured in all subjects. Of 2184 subjects,  
25  
26 2061 subjects with complete data were included in this analysis (response rate, 94.4%).  
27  
28

29 The survey was granted ethical approval by the Ethics Committee of the Shandong  
30  
31 Centre for Disease Control and Prevention, and all participants provided written informed  
32  
33 consent to participate in this study.  
34  
35  
36  
37  
38

39 Educational level and annual household income were used as indicators for social  
40  
41 economic status. We divided participants into five groups based on education level: no  
42  
43 education, primary school, junior high school, senior high school, college, and higher  
44  
45 education. Annual household income was classified into high, middle, and low, according  
46  
47 to tertiles. Body mass index (BMI, relative weight), which is a simple measure of obesity,  
48  
49 was calculated as weight divided by the square of height ( $\text{kg}/\text{m}^2$ ). Individuals with 24  
50  
51  $\text{kg}/\text{m}^2 \leq \text{BMI} < 28 \text{ kg}/\text{m}^2$  were defined as being overweight and those with  $\text{BMI} \geq 28$   
52  
53  $\text{kg}/\text{m}^2$  were considered obese.  
54  
55  
56  
57  
58  
59  
60

1  
2  
3 Statistical analyses were performed using the Statistical Analysis System (SAS) version  
4 9.3 (SAS Institute Inc., Cary, North Carolina, USA).  $P < 0.05$  was considered significant.  
5  
6 All the results shown were weighted by the total demography in Shandong province.  
7  
8 Survey weight (total weight = design weight  $\times$  post-stratification weight) was used to  
9  
10 calculate weighted proportions. Design weight was calculated to account for different  
11  
12 factors including cluster design, strata, and individual. The population data from  
13  
14 Shandong province was used to generate the post-stratification weight. Means and CI  
15  
16 were calculated for all variables and the normality of the data was assessed. Analysis of  
17  
18 variance and chi-square test were used to test the significance of differences between  
19  
20 groups.  
21  
22  
23  
24  
25  
26  
27  
28

## 29 RESULTS

### 30 Study subjects

31  
32 A total of 2061 urine specimens were eligible for analysis out of which 51 samples that  
33  
34 were inaccurate urine collections or extreme outliers for urinary creatinine level were  
35  
36 excluded. There was no significant association between sample inclusion and age, sex,  
37  
38 and residence ( $t = 1.31$ ,  $p > 0.05$ ;  $\chi^2 = \text{square}0.14$ ,  $p > 0.05$ ;  $\chi^2 = \text{square}0.12$ ,  $p > 0.05$ ;  
39  
40 Table 1).  
41  
42  
43  
44  
45  
46  
47  
48

49 The characteristics of each subpopulation are summarised in table 2. Of 2061 eligible  
50  
51 samples, 1076 belonged to men male (52.21%) and 985 to women (47.79%). The mean  
52  
53 age, height, and BMI were 41.23 years, 163.00 cm, and 24.22 kg/m<sup>2</sup>, respectively. There  
54  
55 were no significant differences in age and BMI between men and women ( $t = 0.34$ ,  $p >$   
56  
57  
58  
59  
60

1  
2  
3  
4  
5  
6  
7  
8  
9  
10  
11  
12  
13  
14  
15  
16  
17  
18  
19  
20  
21  
22  
23  
24  
25  
26  
27  
28  
29  
30  
31  
32  
33  
34  
35  
36  
37  
38  
39  
40  
41  
42  
43  
44  
45  
46  
47  
48  
49  
50  
51  
52  
53  
54  
55  
56  
57  
58  
59  
60

p0.05 vs.  $t = 0.29$ ,  $p > p0.05$ ). However, men were significantly taller than women ( $t = 37.65$ ,  $p < p0.05$ ). The prevalence of overweight and obese individuals was 33.72% and 18.00%, respectively, with no significant differences between men and women ( $\chi^2 = 0.90$ ,  $p > p0.05$ ;  $\chi^2 = 0.001$ ,  $p > p0.05$ ). Of the tested subjects, 82.90% had an income <10,000 RMB and 42.60% were junior high school graduates.

### Salt intake

The 24-h urinary sodium level ranged from 22.05 to 750.79 mmol, with a mean of 231.10 mmol, and 258.44 mmol at Q3, and 180.87 mmol at Q1. Tables 3 and 4 show the 24-h urinary sodium excretion and estimated daily salt intake for each subpopulation. The mean sodium level excreted over 24 h was 237.61 mmol (95% CI: 224.77–250.44 mmol), which corresponds to 13.90 g NaCl (95% CI: 13.15–14.65 g). The mean salt intake by rural residents was more than that of urban residents (14.00 g vs 13.68 g;  $p < 0.01$ ). Salt intake in men was higher than that in women (14.40 g vs 13.37 g;  $p < 0.01$ ). There were no obvious differences in the salt intake between age groups.

## DISCUSSION

It can be very challenging to accurately estimate sodium intake. Indeed, it is very difficult to know the exact amount of salt added during cooking (even in restaurants) and at the table. Further, it is hard to estimate the amount of salt that has been left on the plate, and to determine the salt content in food and drinking water [1]. Thus, in agreement with a number of reports [3, 1, 13], the best method to determine salt intake is by measuring the amount excreted using a 24-h urine sample. In China, very few studies have measured the

1  
2  
3 salt intake using 24-h urinary excretion and none have been performed using a sample  
4  
5 representative of the entire Chinese population. Liu et al reported an intake of 188.4  
6  
7 mmol/day (corresponding to 11.02 g NaCl) in a population of 48–56-year-old individuals  
8  
9 in China [14]; this value is much smaller than that obtained in the present study (224.77  
10  
11 mmol/24 h, 13.9 g). The current study indicates that the sodium intake is very high in a  
12  
13 representative population of Shandong adults, higher than that in a UK population aged  
14  
15 19–64 years (148 mmol) [15]. Salt intake by men and women was found to be 246.23  
16  
17 mmol/day and 228.52 mmol/day, respectively, which is higher than that in the population  
18  
19 in Toyama (men, 224 mmol/day; women, 201 mmol/day) [11, 16], the US (men, 180–190  
20  
21 mmol/day; women, 130–150 mmol/day) [17], and the UK (men, 161 mmol/day; women,  
22  
23 127 mmol/day) [17].  
24  
25  
26  
27  
28  
29  
30  
31

32 The salt intake in China is double the recommended intake of 80–110 mmol/day (5–6 g  
33  
34 salt/day) issued by the World Health Organisation in 1982 [18], which has led to the  
35  
36 adoption of the China Nutrition Recommendations [19]. In China, salt intake is higher  
37  
38 mainly due to the high consumption of soya sauce and the tradition of adding a large  
39  
40 amount of salt to the food both during cooking and at the table [3, 20, 21]. As reported in  
41  
42 several studies, salt intake in men (14.4 g) was higher than that in women (13.9 g) in  
43  
44 Shandong possibly because of the higher overall food intake by men and the differences  
45  
46 in food habits between men and women [3, 20, 22]. In majority of populations, salt intake  
47  
48 is high and well above the daily recommended values. Now resident health records are  
49  
50 being established in Shandong province, it is necessary to evaluate and record the salt  
51  
52 intake for individuals by FFQ or other method,, Especially during following up the  
53  
54  
55  
56  
57  
58  
59  
60



1  
2  
3 chronic patients and high risk population, it is very important to focus on the salt intake  
4 and persuade them to change the habit of high salt intake.  
5  
6

7  
8 Strong and consistent evidence from animal studies, clinical trials, and epidemiological  
9 data from within and across populations implicate high salt intake as an important risk  
10 factor for high BP among hypertensive and normotensive individuals; additionally, high  
11 salt intake is also associated with increased risk of coronary heart disease and stroke.  
12 Given that health problems such as hypertension [23] and CVD [24] are associated with  
13 excessive salt intake, public health initiatives are needed to help reduce salt consumption  
14 [3,4] and consequently lower the burden of CVD and increase life expectancy. The  
15 government needs to focus and resolve thisThe severe situation. Saltreduction must  
16 be undertaken. Healthtaken. H education and promotion usingby the media campaigns, as  
17 well as timely community-based initiatives to limit the amount of salt added to food by  
18 individuals would increase public awareness. Meanwhile, iti is necessary to collaborate  
19 with restaurants to reduce excessive salt commonly included in various dishes. With  
20 increasing westernisation of cultures, it is essential to ensure low levels of salt in  
21 processed foods. Such public health approaches can be simple, less costly, and effective.  
22 Indeed, campaigns aresuch as (SMASH and the China Rural Health Initiative Sodium  
23 Reduction Study are already underway [25]. As reported by Li et al [26], in China,  
24 measures for salt reduction will include government initiatives, health education and  
25 promotion, promotion of low sodium salt in ,food processing companies and restaurants.  
26 In Shandong, education through radio, television, internet, and movies is underway to  
27 improve the knowledge of the residents about low-salt diets. To bring about behavioural  
28 changes, salt spoons have been provided for every family in the entire province. Key  
29  
30  
31  
32  
33  
34  
35  
36  
37  
38  
39  
40  
41  
42  
43  
44  
45  
46  
47  
48  
49  
50  
51  
52  
53  
54  
55  
56  
57  
58  
59  
60

1  
2  
3 groups comprising of governors, medical personnel, and stakeholders from the food  
4 processing enterprise and restaurants are trained. Local standards for the amount of salt in  
5 soy sauce pickles and other dishes in the cuisine of Shandong have been formulated. The  
6 results from the present study could be useful in these endeavours.  
7  
8  
9  
10  
11

12  
13  
14  
15 There are certain limitations in this study. First, the sample only included Chinese adults  
16 aged 18–69 years; hence, the results cannot be extrapolated to other groups. Because  
17 behaviour is formed during childhood, salt intake should be evaluated and health  
18 education should be administered during this period. Second, available the 24-h urinary  
19 salt excretion method does not account for electrolyte loss via routes other than the  
20 kidneys, such as the skin and respiratory tract, and will therefore tend to slightly  
21 underestimate the true intake.  
22  
23  
24  
25  
26  
27  
28  
29  
30  
31  
32  
33  
34  
35  
36  
37  
38  
39  
40  
41  
42  
43  
44  
45  
46  
47  
48  
49  
50  
51  
52  
53  
54  
55  
56  
57  
58  
59  
60

## Acknowledgments

The authors would like to thank all the investigators from the national, provincial, and county level CDCs, and all the participants of the survey.

## Contributors

Conceived and designed the experiments: Jiyu Zhang, Liuxia Yan, Junli Tang, Zhenqiang Bi. Performed the experiments: Jiyu Zhang, Junli Tang, Zhenqiang Bi. Analysed the data: Jiyu Zhang, Junli Tang, Zhenqiang Bi. Contributed reagents/materials/analysis tools: Jiyu Zhang, Jixiang Ma, Xiaolei Guo, Wen-hua Zhao, Xiaofei Zhang, Jianhong Li, Jie Chu. Wrote the manuscript: Jiyu Zhang, Liuxia Yan, Junli Tang, Zhenqiang Bi.

## Funding

The survey was supported by funds from the Chinese Centre for Disease Control and Prevention (China CDC), National Centre for Non-Communicable and Chronic Disease Control and Prevention (NCNCD, China CDC), and the Technical Development Plan in Shandong (implemented by Shandong CDC, Grant number: 2012GSF11828).

## Competing interests

None declared.

## Ethics approval

The survey was approved by the Ethics Committee of the Shandong Centre for Disease Control and Prevention, China.

## Data sharing statement

No additional data available.

## REFERENCES

1. Ministry of Health. (2010) Annual Report on Health Statistics. Beijing: Peking Union Medical College Publishing House.
2. China CDC & China News. (2011) Salt reduction and hypertension prevention. China
3. Brown IJ, Tzoulaki I, Candeias V, et al. (2009) Salt intakes around the world: implications for public health international. *Int J Epidemiol* 38, 791–813.
4. He FJ, MacGregor GA. (2009) A comprehensive review on salt and health and current experience of worldwide salt reduction programs. *J Hum Hypertens* 23, 363–384.
5. Hoffmann IS, Cubeddu LX. (2009) Salt and the metabolic syndrome. *Nutr Metab Cardiovasc Dis* 19, 123–128.
6. Strazzullo P, D'Elia L, Kandala NB, et al. (2009) Salt intake, stroke and cardiovascular disease: meta-analysis of prospective studies. *BMJ* 339, b4567.
7. Bibbins-Domingo K, Chertow GM, Coxson PG, et al. (2010) Projected effect of dietary salt reductions on future cardiovascular disease. *N Engl J Med* 362, 590–599.
9. Beaglehole R, Bonita R, Horton R, et al. (2011) Priority actions for the non-communicable disease crisis. *Lancet* 377: 1438-1447.
10. Chan WG. Salt reduction initiatives in developed countries and lessons for China: a systematic review. Available at <http://hdl.handle.net/10722/145711>. Accessed 15 August 2012.
11. Centers for Disease Control and Prevention. (2012) CDC Grand Rounds: Dietary sodium reduction-time for choice. *MMWR*: 61(05), 89-91.
12. Anderson CA, Appel LJ, Okuda N, et al. (2010) Dietary source of sodium in China, Japan, the United Kingdom, the United States, women and men aged 40 to 59 years: the

- 1  
2  
3 INTERMAP study. *Journal of the American Dietetic Association* 110(5): 736-745.  
4  
5  
6 13. Hunter D. (1998) Biochemical indicators of dietary intake. In *Nutritional*  
7  
8 *Epidemiology*, pp. 174–243 [W Willett, editor]. Oxford: Oxford University Press.  
9  
10  
11 14. Longjian LIU, Katsumi IKEDA, and Yukio YAMORI. (2000) Twenty-four Hour  
12  
13 *Urinary Sodium and 3-Methylhistidine Excretion in Relation to Blood pressure in*  
14  
15 *Chinese: Results from the China-Japan Cooperative Research for the WHO-CARDIAC*  
16  
17 *study. Hypertens Res* 23, 152-157.  
18  
19  
20 15. National Centre for Social Research. An assessment of dietary sodium levels among  
21  
22 *adults (aged 19–64) in the UK general population in 2008, based on analysis of dietary*  
23  
24 *sodium in 24 hour urine samples. UK: Food Standards Agency, 2008.*  
25  
26  
27 16. Rose G, Stamler J. The INTERSALT Study: background, methods and main results. *J*  
28  
29 *Hum Hypertens* 1989; 3:283–88.  
30  
31  
32 17. Stamler J, Elliott P, Chan Q, for the INTERMAP Research Group (2003b).  
33  
34 *INTERMAP appendix tables. J Hum Hypertens*, 17:655–775.  
35  
36  
37 18 WHO Expert Committee (1982) *Prevention of Coronary Heart Disease. WHO*  
38  
39 *Technical Report Series no. 678. Geneva: WHO.*  
40  
41  
42 19. Chinese Nutrition Society (2007). *The Dietary Guidelines for Chinese Residents. Tibet,*  
43  
44 *China: Tibetan People’s Publishing House, 55.*  
45  
46 20. Zhou BF, Stamler J, Dennis B, et al. (2003) INTERMAP Research Group Nutrient  
47  
48 *intakes of middle-aged men and women in China, Japan, United Kingdom, and United*  
49  
50 *States in the late 1990s: the INTERMAP Study. J Hum Hypertens* 17, 623–630.  
51  
52  
53 21. Liu L, Liu L, Ding Y, et al. (2001) Ethnic and environmental differences in various  
54  
55 *markers of dietary intake and blood pressure among Chinese Han and three other*  
56  
57  
58  
59  
60

1  
2  
3 minority peoples of China: results from the WHO Cardiovascular Diseases and  
4 Alimentary Comparison (CARDIAC) Study. *Hypertens Res Clin Exp* 24, 315–322.  
5  
6

7  
8 22. Hoffmann IS & Cubeddu LX (2009) Salt and the metabolic syndrome. *Nutr Metab*  
9 *Cardiovasc Dis* 19, 123–128.  
10  
11

12  
13 23. Luft FC (1998) Salt and hypertension at the close of the millenium. *Wien Klin*  
14 *Wochenschr* 110, 459–466.  
15  
16

17  
18 24. Hooper L, Bartlett C, Davey Smith G, et al. (2003) Reduced dietary salt for  
19 prevention of cardiovascular disease. *The Cochrane Database of Systematic Reviews*  
20 2003, issue 3 CD003656.  
21  
22

23  
24 25. Li N, Yan LL, Niu W, et al. (2013) A large-scale cluster randomized trial to determine  
25 the effects of community-based dietary sodium reduction--the China Rural Health  
26 Initiative Sodium Reduction Study. *Am Heart J*.166(5):815-22.  
27  
28

29  
30 26. YAN Li, LI Yan, WU Yang-fen. (2011) Reducing salt intake for hypertension control:  
31 related evidence and recommendation on strategies in China. *Chin J Epidemiol*  
32  
33

34  
35  
36  
37 32(12):1188-1191.  
38  
39  
40  
41  
42  
43  
44  
45  
46  
47  
48  
49  
50  
51  
52  
53  
54  
55  
56  
57  
58  
59  
60

**Table 1** Test of goodness of fit between including and excluding study population

| Gender | Including sample |       |       |       |       |       | Excluding sample |      |       |       |       |       |
|--------|------------------|-------|-------|-------|-------|-------|------------------|------|-------|-------|-------|-------|
|        | Total            |       | Urban |       | Rural |       | Total            |      | Urban |       | Rural |       |
|        | n                | %     | n     | %     | n     | %     | n                | %    | n     | %     | n     | %     |
| Male   | 1076             | 52.21 | 342   | 16.59 | 734   | 35.61 | 28               | 54.9 | 7     | 13.73 | 21    | 41.18 |
| Female | 985              | 47.79 | 311   | 15.09 | 674   | 32.7  | 23               | 45.1 | 8     | 15.69 | 15    | 29.41 |
| Total  | 2061             | 100   | 653   | 31.68 | 1408  | 68.32 | 51               | 100  | 15    | 29.41 | 36    | 70.59 |

Table 2 Personal characteristics of the study sample by sex and age

|                               | Total(n=2061) |       |        | Male(n=1076) |       |        | Female(n=985) |       |        |
|-------------------------------|---------------|-------|--------|--------------|-------|--------|---------------|-------|--------|
|                               | Mean          | SD    | Median | Mean         | SD    | Median | Mean          | SD    | Median |
| <b>Age(years)</b>             | 41.23         | 13.99 | 39.00  | 41.12        | 14.32 | 39.00  | 41.34         | 13.62 | 39.00  |
| <b>Height(cm)</b>             | 163.00        | 8.84  | 162.60 | 168.78       | 7.02  | 169.20 | 157.27        | 6.23  | 157.20 |
| <b>BMI (kg/m<sup>2</sup>)</b> | 24.53         | 3.90  | 24.22  | 24.55        | 3.90  | 24.25  | 24.51         | 3.90  | 24.15  |
| <b>Overweight (%)</b>         | 33.72         |       |        | 34.67        |       |        | 32.69         |       |        |
| <b>Obese (%)</b>              | 18.00         |       |        | 18.03        |       |        | 17.97         |       |        |
| <b>Income (Yuan,%)</b>        |               |       |        |              |       |        |               |       |        |
| <5000                         | 52.24         |       |        | 51.1         |       |        | 53.45         |       |        |
| 5000-                         | 30.66         |       |        | 31.4         |       |        | 29.87         |       |        |
| 10000-                        | 8.35          |       |        | 8.27         |       |        | 8.44          |       |        |
| 15000-                        | 5.45          |       |        | 5.64         |       |        | 5.25          |       |        |



---

|                                    |       |       |       |
|------------------------------------|-------|-------|-------|
| <b>20000-</b>                      | 3.29  | 3.57  | 2.99  |
| <b>Education (%)</b>               |       |       |       |
| <b>illiteracy</b>                  | 13.79 | 7.72  | 20.43 |
| <b>junior</b>                      | 19.09 | 17.58 | 20.73 |
| <b>junior high</b>                 | 42.06 | 47.72 | 35.87 |
| <b>senior</b>                      | 15.15 | 16.84 | 13.31 |
| <b>junior college or<br/>above</b> | 9.91  | 10.14 | 9.65  |

---

**Table3 Urinary sodium excretion of Shandong adults aged 18-69 in 2011**  
(Weighted mean,SD, 95% CI, mmol/24h)

| Gender | Age-group | Urban |        |       |        | Rural  |      |        |        | Total  |        |      |        |      |        |        |
|--------|-----------|-------|--------|-------|--------|--------|------|--------|--------|--------|--------|------|--------|------|--------|--------|
|        |           | N     | Mean   | SD    | 95% CI | N      | Mean | SD     | 95% CI | N      | Mean   | SD   | 95% CI |      |        |        |
| Male   | 18-29     | 85    | 241.64 | 18.23 | 194.77 | 288.51 | 196  | 244.81 | 9.85   | 222.52 | 267.10 | 281  | 243.88 | 8.72 | 225.17 | 262.58 |
|        | 30-39     | 91    | 255.88 | 12.30 | 224.25 | 287.50 | 185  | 247.19 | 9.72   | 225.21 | 269.17 | 276  | 249.99 | 7.79 | 233.30 | 266.69 |
|        | 40-49     | 65    | 233.33 | 17.89 | 187.35 | 279.31 | 139  | 247.90 | 7.48   | 230.99 | 264.82 | 204  | 243.59 | 7.40 | 227.72 | 259.47 |
|        | 50-59     | 51    | 263.00 | 12.72 | 230.28 | 295.71 | 111  | 251.36 | 12.64  | 222.78 | 279.95 | 162  | 255.27 | 9.44 | 235.02 | 275.52 |
|        | 60-69     | 50    | 239.00 | 14.74 | 201.12 | 276.88 | 103  | 232.24 | 12.62  | 203.69 | 260.79 | 153  | 234.42 | 9.82 | 213.36 | 255.49 |
|        | Subtotal  | 342   | 246.81 | 12.46 |        |        | 734  | 245.96 | 8.22   | 227.38 | 264.55 | 1076 | 246.23 | 6.87 | 231.49 | 260.96 |
| Female | 18-29     | 79    | 200.77 | 13.37 | 166.40 | 235.14 | 173  | 225.93 | 7.26   | 209.51 | 242.35 | 252  | 219.01 | 6.69 | 204.66 | 233.37 |
|        | 30-39     | 79    | 236.43 | 8.99  | 213.31 | 259.54 | 165  | 234.70 | 9.62   | 212.94 | 256.46 | 244  | 235.27 | 7.11 | 220.01 | 250.53 |
|        | 40-49     | 59    | 236.92 | 12.94 | 203.65 | 270.18 | 131  | 231.88 | 12.22  | 204.25 | 259.52 | 190  | 233.46 | 9.43 | 213.24 | 253.69 |
|        | 50-59     | 53    | 213.23 | 10.24 | 186.91 | 239.54 | 111  | 245.28 | 11.41  | 219.48 | 271.09 | 164  | 234.73 | 8.73 | 216.01 | 253.45 |
|        | 60-69     | 41    | 200.29 | 11.23 | 171.42 | 229.15 | 94   | 221.79 | 7.72   | 204.32 | 239.26 | 135  | 215.48 | 6.34 | 201.88 | 229.07 |
|        | Subtotal  | 311   | 219.97 | 9.07  | 196.66 | 243.29 | 674  | 232.32 | 7.72   | 214.85 | 249.79 | 985  | 228.52 | 5.99 | 215.67 | 241.37 |
| Total  | 18-29     | 164   | 222.94 | 10.65 | 195.56 | 250.32 | 369  | 235.72 | 7.63   | 218.46 | 252.98 | 533  | 232.08 | 6.15 | 218.89 | 245.26 |
|        | 30-39     | 170   | 246.19 | 9.86  | 220.85 | 271.54 | 350  | 241.06 | 9.11   | 220.44 | 261.68 | 520  | 242.73 | 6.98 | 227.75 | 257.71 |
|        | 40-49     | 124   | 235.11 | 12.06 | 204.10 | 266.11 | 270  | 240.30 | 8.95   | 220.05 | 260.56 | 394  | 238.72 | 7.16 | 223.37 | 254.07 |
|        | 50-59     | 104   | 238.44 | 7.54  | 219.05 | 257.83 | 222  | 248.32 | 9.26   | 227.36 | 269.27 | 326  | 245.03 | 6.68 | 230.70 | 259.37 |
|        | 60-69     | 91    | 220.68 | 12.40 | 188.80 | 252.56 | 197  | 226.94 | 8.61   | 207.45 | 246.43 | 288  | 225.01 | 7.05 | 209.89 | 240.14 |
|        | Subtotal  | 653   | 233.82 | 9.90  | 208.36 | 259.28 | 1408 | 239.30 | 7.52   | 222.28 | 256.33 | 2061 | 237.61 | 5.98 | 224.77 | 250.44 |

**Table4 Salt intake of Shandong adults aged 18-69 in 2011**  
**(Weighted mean, SD,95%CI, grams/24h)**

| Gender | Age-group       | Urban |       |      |             | Rural |       |      |             | Total |       |      |             |
|--------|-----------------|-------|-------|------|-------------|-------|-------|------|-------------|-------|-------|------|-------------|
|        |                 | N     | Mean  | SD   | 95% CI      | N     | Mean  | SD   | 95% CI      | N     | Mean  | SD   | 95% CI      |
| Male   | 18-29           | 85    | 14.14 | 1.07 | 11.39 16.88 | 196   | 14.32 | 0.58 | 13.02 15.63 | 281   | 14.27 | 0.51 | 13.17 15.36 |
|        | 30-39           | 91    | 14.97 | 0.72 | 13.12 16.82 | 185   | 14.46 | 0.57 | 13.17 15.75 | 276   | 14.62 | 0.46 | 13.65 15.60 |
|        | 40-49           | 65    | 13.65 | 1.05 | 10.96 16.34 | 139   | 14.50 | 0.44 | 13.51 15.49 | 204   | 14.25 | 0.43 | 13.32 15.18 |
|        | 50-59           | 51    | 15.39 | 0.74 | 13.47 17.30 | 111   | 14.70 | 0.74 |             |       |       |      |             |
|        |                 |       |       |      |             |       |       |      | 13.03 16.38 | 162   | 14.93 | 0.55 | 13.75 16.12 |
|        | 60-69           | 50    | 13.98 | 0.86 | 11.77 16.20 | 103   | 13.59 | 0.74 | 11.92 15.26 | 153   | 13.71 | 0.57 | 12.48 14.95 |
|        | <b>Subtotal</b> | 342   | 14.44 | 0.73 | 12.56 16.31 | 734   | 14.39 | 0.48 | 13.30 15.48 | 1076  | 14.40 | 0.40 | 13.54 15.27 |
| Female | 18-29           | 79    | 11.75 | 0.78 | 9.73 13.76  | 173   | 13.22 | 0.42 | 12.26 14.18 | 252   | 12.81 | 0.39 | 11.97 13.65 |
|        | 30-39           | 79    | 13.83 | 0.53 | 12.48 15.18 | 165   | 13.73 | 0.56 | 12.46 15.00 | 244   | 13.76 | 0.42 | 12.87 14.66 |
|        | 40-49           | 59    | 13.86 | 0.76 | 11.91 15.81 | 131   | 13.57 | 0.71 | 11.95 15.18 | 190   | 13.66 | 0.55 | 12.47 14.84 |
|        | 50-59           | 53    | 12.47 | 0.60 | 10.93 14.01 | 111   | 14.35 | 0.67 | 12.84 15.86 | 164   | 13.73 | 0.51 | 12.64 14.83 |
|        | 60-69           | 41    | 11.72 | 0.66 | 10.03 13.41 | 94    | 12.97 | 0.45 | 11.95 14.00 | 135   | 12.61 | 0.37 | 11.81 13.40 |
|        | <b>Subtotal</b> | 311   | 12.87 | 0.53 | 11.50 14.23 | 674   | 13.59 | 0.45 | 12.57 14.61 | 985   | 13.37 | 0.35 | 12.62 14.12 |
| Total  | 18-29           | 164   | 13.04 | 0.62 | 11.44 14.64 | 369   | 13.79 | 0.45 | 12.78 14.80 | 533   | 13.58 | 0.36 | 12.81 14.35 |
|        | 30-39           | 170   | 14.40 | 0.58 | 12.92 15.89 | 350   | 14.10 | 0.53 | 12.90 15.31 | 520   | 14.20 | 0.41 | 13.32 15.08 |
|        | 40-49           | 124   | 13.75 | 0.71 | 11.94 15.57 | 270   | 14.06 | 0.52 | 12.87 15.24 | 394   | 13.97 | 0.42 | 13.07 14.86 |
|        | 50-59           | 104   | 13.95 | 0.44 | 12.81 15.08 | 222   | 14.53 | 0.54 | 13.30 15.75 | 326   | 14.33 | 0.39 | 13.50 15.17 |
|        | 60-69           | 91    | 12.91 | 0.73 | 11.05 14.77 | 197   | 13.28 | 0.50 | 12.14 14.42 | 288   | 13.16 | 0.41 | 12.28 14.05 |
|        | <b>Subtotal</b> | 653   | 13.68 | 0.58 | 12.19 15.17 | 1408  | 14.00 | 0.44 | 13.00 15.00 | 2061  | 13.90 | 0.35 | 13.15 14.65 |

**Estimating daily salt intake based on ~~24h~~24-hour urinary sodium excretion among  
adults aged 18–69 years in Shandong, China**

*Corresponding Author:*

Dr. Zhen-qiang BI

Shandong Center for Disease Control and Prevention

16992# Jingshi RD., Jinan, Shandong, PR of China—250014

TEL: 0086-531-82679601

FAX: 0086-531-82679620

E-mail: [bizhenqiang@gmail.com](mailto:bizhenqiang@gmail.com)

Authors: Ji-yu ZHANG<sup>1</sup>, Liu-xia YAN<sup>2</sup>, Jun-li TANG<sup>1</sup>, Ji-xiang MA<sup>2</sup>, Xiao-lei GUO<sup>1</sup>,

Wen-hua ZHAO<sup>3</sup>, Xiao-fei ZHANG<sup>4</sup>, Jian-hong Li<sup>2</sup>, Jie Chu<sup>1</sup>, Zhen-qiang BI<sup>1\*</sup>

Affiliations:

1. Shandong Center for Disease Control and Prevention, 250014 Jinan, China

2. National Center for Chronic and Non-communicable ~~Disease~~Disease Control and Prevention

Chinese Center for Disease Control and Prevention, 100050 Beijing, China

3. Chinese Center for Disease Control and Prevention, 102206 Beijing, China

4. Department of Clinical Epidemiology and Biostatistics, Second ~~Affiliated~~Affiliated ~~Affiliated~~Affiliated Hospital of Zhejiang University College of Medicine,

310009 Hangzhou, China

TABLES: 4

FIGURES: 0

Formatted: English (U.K.)

Formatted: No underline, Font color: Auto, English (U.K.)

Formatted: English (U.K.)

Formatted: No underline, Font color: Auto, English (U.K.)

Formatted: English (U.K.)

Formatted: No underline, Font color: Auto, English (U.K.)

Formatted: English (U.K.)

Formatted: No underline, Font color: Auto, English (U.K.)

Formatted: English (U.K.)

Formatted: No underline, Font color: Auto, English (U.K.)

Formatted: No underline, Font color: Auto

Formatted: No underline, Font color: Auto, English (U.K.)

Formatted: English (U.K.)

Formatted: No underline, Font color: Auto, English (U.K.)

Formatted: English (U.K.)

Formatted: No underline, Font color: Auto, English (U.K.)

Formatted: English (U.K.)

Formatted: No underline, Font color: Auto, English (U.K.)

Formatted: No underline, Font color: Auto, English (U.K.)

Formatted: English (U.K.)

Formatted: No underline, English (U.K.)

Formatted: English (U.K.)

Formatted: No underline, English (U.K.)

Formatted: English (U.K.)

1  
2  
3  
4  
5  
6  
7  
8  
9  
10  
11  
12  
13  
14  
15  
16  
17  
18  
19  
20  
21  
22  
23  
24  
25  
26  
27  
28  
29  
30  
31  
32  
33  
34  
35  
36  
37  
38  
39  
40  
41  
42  
43  
44  
45  
46  
47  
48  
49  
50  
51  
52  
53  
54  
55  
56  
57  
58  
59  
60

SUPPLEMENTARY: 0

WORD COUNT: 1906

KEY WORDS: Salt, sodium, 24-hour urine, cardiovascular disease, China

- Formatted: No underline, Font color: Auto, English (U.K.)
- Formatted: English (U.K.)
- Formatted: No underline, Font color: Auto, English (U.K.)
- Formatted: English (U.K.)
- Formatted: No underline, English (U.K.)
- Formatted: English (U.K.)
- Formatted: No underline, Font color: Auto, English (U.K.)

For peer review only

**ABSTRACT**

**Objective:** Background: In 2011, China's National Health and Family Planning Commission and the Shandong Provincial Government (population of Shandong, 96 million) Provincial Government launched the Shandong Ministry of Health Action on Salt and Hypertension (SMASH) Project to prevent and control hypertension. This study estimates the daily salt intake among in the adult Shandong population (aged 18–69 years) during in 2011, based on 24-hour urinary sodium excretion in China.

**Setting:** Twenty counties/districts by geographic distribution (Eastern, Central Southern, and North Western) and residence (urban versus rural), Shandong, China.

**Participants:** We randomly selected 2184 adults and obtained usable 24 h urine samples from 2061. Urine volume <500 mL or creatinine level <3.81 mmol (mean-2SD: day/weight (kg)) for men and 4.57 mmol (mean-2SD: day/weight (kg)) for women were considered deficient to ensure the completeness of the urine sample. Inaccurate urine collections and extreme outliers for urinary creatinine level were excluded from the analysis.

**Methods:** In 2011, a cross sectional survey was conducted with a random sample of random sample of 2061 adults aged 18–69 years was conducted in Shandong. A 24-hour urine sample was collected from each participant. All urine samples were tested at the ADICON Clinical Laboratory for Nasodium and creatinine content level. Daily salt intake was estimated based on the 24-hour urinary sodium excretion because assuming that all sodium was assumed to be ingested was in the form of sodium chloride (NaCl). Data are expressed as means and 95% confidence intervals (CIs).

**Results:** The mean sodium level excreted on excretion of Na over 24h 24 h was 237.61

- Formatted ... [1]
- Formatted ... [2]
- Formatted ... [3]
- Formatted ... [4]
- Formatted ... [5]
- Formatted ... [6]
- Formatted ... [7]
- Formatted ... [8]
- Formatted ... [9]
- Formatted ... [10]
- Formatted ... [11]
- Formatted ... [12]
- Formatted ... [13]
- Formatted ... [14]
- Formatted ... [15]
- Formatted ... [16]
- Formatted ... [17]
- Formatted ... [18]
- Formatted ... [19]
- Formatted ... [20]
- Formatted ... [21]
- Formatted ... [22]
- Formatted ... [23]
- Formatted ... [24]
- Formatted ... [25]
- Formatted ... [26]
- Formatted ... [27]
- Formatted ... [28]
- Formatted ... [29]
- Formatted ... [30]
- Formatted ... [31]
- Formatted ... [32]
- Formatted ... [33]
- Formatted ... [34]
- Formatted ... [35]
- Formatted ... [36]
- Formatted ... [37]
- Formatted ... [38]
- Formatted ... [39]
- Formatted ... [40]
- Formatted ... [41]
- Formatted ... [42]

~~mmol (95% CI: 224.77–250.44) mmolMmolmmol~~. Overall, the estimated mean salt intake was ~~on average~~ 13.90 g/day (95% CI: 13.15–14.65) ~~g/day~~. The mean salt intake by rural residents was more than that of urban residents (14.00 g vs 13.68 g; p<0.01). Salt intake in men was higher than that in women (14.40 g vs 13.37 g; p<0.01). The mean intake was higher among rural residents (14.00g00 g) than among urban residents (13.68g);68 g) and was higher amongin men (14.40g40 g) compared tothan in women (13.37g). About37 g). Approximately 96% of the survey participants had a salt dietary salt intake of ~~≥6g6 g~~ or more per day.

**Conclusion:** ~~Salt~~The salt intake in Shandong is alarmingly higher ~~with a great majority (96%) of adults (96%) consuming more than currentlythe current~~ recommended (~~6g/damout~~ 6 g/day). ~~There is an urgent need to develop and implement~~Thus, effective interventions to reduce the salt intake ~~levellevels~~ to combat the increasing burden of ~~nonecommunicable~~non-communicable diseases need to be developed and implemented.

### Strengths and limitations

~~The gold~~ Gold Standard ~~Standard~~, 24-hour urinary sodium excretion urine method was used to estimate salt intake with standard ~~checks for completeness of the specimens based upon urine volume and the level of urine creatinine~~ excretionexcreted. ~~Limitation~~A limitation~~excretion~~. The National China Nutrition Surveys (1982, 1992, and 2002) and the Chinese Behavioral Risk Factor Surveillancee ~~calculated salt intake in Chinese adults, and the results indicated that about 80% of the Chinese exceeded the Chinese Nutritional Society's (2007) recommended salt (sodium~~

Formatted: No underline, Font color: Auto, English (U.K.)

Formatted: English (U.K.)

Formatted: No underline, Font color: Auto, English (U.K.)

Formatted: English (U.K.)

Formatted: Font: Bold, English (U.K.)

Formatted: No underline, Font color: Auto, English (U.S.)

Formatted: English (U.S.)

Formatted: No underline, Font color: Auto, English (U.K.)

Formatted: English (U.K.)

Formatted: No underline, Font color: Auto, English (U.K.)

Formatted ... [43]

Formatted: English (U.K.)

Formatted ... [44]

Formatted ... [45]

Formatted ... [46]

ehloride) intake upper level of 6 gram/day. In 2002, the average daily salt intake was 12.6 gram in Shandong Province. However, the salt intake from the above surveys was estimated by FFQ or dietary recall, and the salt intake volumes calculated might be high or low. The method of salt intake based on 24h urinary sodium excretion was applied in the other researches in China, but the number of the sample was small and not well representative for Chinese aged 18-69 years. In this study, 2184 subjects were investigated and 2061 urine specimens were collected by multi stage cluster sampling which was used to select a provincially representative. Based on 24h urinary sodium excretion, the exact salt intake in Chinese aged 18-69 years was estimated relatively. The present study indicates that the intake of Na is very high in a representative Chinese adults aged 18-69 years. This paper suggests that population salt reduction campaign is a must in China. The results also provided the 24h urinary sodium in Chinese aged 18-69 years for other studies.

~~Limitation of this study is as below that the~~ The sample only ~~included~~ comprised Chinese adults aged 18-69 years, so, hence, the results ~~are not~~ cannot be extrapolated to other groups; ~~24h~~ The ~~The~~ 24-h~~24h~~ urinary sodium excretion method does not account for electrolyte loss ~~via routes~~ other than ~~via~~ the kidneys, and therefore will tend to slightly underestimate the ~~true amount of true salt~~ intake.

- Formatted: No underline, Font color: Auto, English (U.K.)
- Formatted: No underline, Font color: Auto, English (U.S.)
- Formatted: No underline, Font color: Auto, English (U.K.)
- Formatted: No underline, Font color: Auto, English (U.S.)
- Formatted: Indent: First line: 0 ch
- Formatted: No underline, Font color: Auto, English (U.K.)
- Formatted: No underline, Font color: Auto, English (U.K.)
- Formatted: No underline, Font color: Auto, English (U.S.)
- Formatted: No underline, Font color: Auto, English (U.K.)
- Formatted: No underline, Font color: Auto, English (U.S.)
- Formatted: No underline, Font color: Auto, English (U.K.)
- Formatted: No underline, Font color: Auto, English (U.S.)
- Formatted: No underline, Font color: Auto, English (U.K.)
- Formatted: No underline, Font color: Auto, English (U.S.)
- Formatted: No underline, Font color: Auto, English (U.S.)
- Formatted: No underline, Font color: Auto, English (U.S.)
- Formatted: No underline, Font color: Auto, English (U.S.)
- Formatted: No underline, Font color: Auto, English (U.S.)
- Formatted: English (U.S.)
- Formatted: English (U.K.)
- Formatted: No underline, Font color: Auto, English (U.K.)



## BACKGROUND

In China, hypertension is a major contributor to cardiovascular disease (CVD), which accounts for 40% of the deaths [1] and 23% of the health care costs [2]. Evidence suggests that a high level of salt intake is associated with high blood pressure (BP) and a greater risk of stroke and CVD [3–6]. The National China Nutrition Surveys (1982, 1992, and 2002) and the Chinese Behavioral Risk Factor Surveillance indicated that ~~about~~ approximately 80% of ~~the~~ Chinese individuals consumed more than ~~exceeded the~~ Chinese Nutritional Society's (2007) recommended maximum salt (sodium chloride) intake upper level of 6 gram/day, recommended by the Chinese Nutritional Society (2007). ~~'s~~ (2007) recommended salt (sodium chloride) intake upper level of 6 gram/day. In 2010, the estimated average mean salt intake ~~of among the~~ Chinese citizens was 9.1 grams/day in urban areas, and 11.5 grams/day in rural areas [1]. The Chinese diet is high in sodium.

Reducing ~~population~~ salt intake is one of the easiest, ~~more~~ most efficient, and cost-effective ways to reduce the burden of CVD and ~~save~~ health care costs, ~~and~~ ~~this~~ which would result in a major improvement in public health [1, 7]. ~~Internationally~~ Globally, ~~calls have been made for~~ dietary sodium reduction ~~to be~~ has been recommended as a major intervention method for the prevention and control of non-communicable diseases [8]. ~~Many~~ Several countries, including Japan, the United Kingdom, ~~(UK)~~, Finland, Portugal, and the United States, ~~(US)~~, have succeeded in ~~reducing the~~ reduced population-wide sodium intake [9–11]. ~~In China~~ contrast to ~~Western countries~~ China, a major challenge to the efforts to reduce sodium intake

Formatted: English (U.K.)

Formatted: No underline, Font color: Auto, English (U.K.)

Formatted: English (U.K.)

Formatted: No underline, Font color: Auto, English (U.K.)

reduction effort, in contrast to western countries, is that a majority of sodium comes from the salt added to home cooked food rather than in commercially processed foods. A recent study suggested that most of the dietary sodium (76%) in China was from the salt added during home cooking [12]. In contrast, processed foods contributed heavily to sodium intake in the UK (95%) and the US (71%) [12]. To prevent and control hypertension and improve health, efforts to remove excess sodium from diets in China should focus on reducing the sodium level in home cooked food.

Shandong Province is one of the most populous provinces in China. Sodium intake by most Shandong residents considerably exceeds the recommended limit. In 2002, the average daily salt intake was 12.6 g and the prevalence of hypertension was 25.1%. High salt intake has caused huge economic loss [2]. To reduce sodium in the Chinese diet, in 2011, the Chinese Ministry of Health (MOH) selected Shandong province as a national pilot area for sodium reduction and the Shandong MOH Action on Salt and Hypertension (SMASH) Project was formed. In order to set up to reduce the sodium level in the Chinese diet. To help develop effective interventions for the SMASH Project, in 2011, a baseline survey was conducted in 2011 to assess the salt consumption, and the prevalence of hypertension among the Shandong residents in Shandong. The measurement of 24-h urinary sodium excretion is considered the gold standard method for obtaining data of Na intakes on the sodium intake in population surveys [1]. However, in China, there is few research results studies have been conducted on the salt intake of the general population based on 24-h

Formatted: No underline, Font color: Auto, English (U.K.)

Formatted: English (U.K.)

Formatted: No underline, Font color: Auto, English (U.K.)

Formatted ... [47]

Formatted ... [48]

Formatted ... [49]

Formatted ... [50]



1  
2  
3  
4  
5  
6  
7  
8  
9  
10  
11  
12  
13  
14  
15  
16  
17  
18  
19  
20  
21  
22  
23  
24  
25  
26  
27  
28  
29  
30  
31  
32  
33  
34  
35  
36  
37  
38  
39  
40  
41  
42  
43  
44  
45  
46  
47  
48  
49  
50  
51  
52  
53  
54  
55  
56  
57  
58  
59  
60

education, income).

Trained public health professionals, all of whom had previous with experience in conducting interviews in for similar health surveys. Questions collected administered a face-to-face, close-ended questionnaire. The questions were used to collect information on: demographics (gender, age, education, and income).

A single, timed 24-hour urine collection was obtained performed for the estimation of electrolyte excretion. All subjects were asked to provide 24-hour urine samples. The participants, for which they were given written and verbal instructions for the 24 hour urine collection. The first urine of the day was discarded and all urine collected over the following 24 hours was collected in the bottles that were provided. The urine volume was measured, the sample was carefully mixed, and a 20 mL an aliquot of 20 mL was taken withdrawn. Aliquots were immediately frozen to at -20°C and were sent to the laboratory for analysis.

The sodium concentration was determined by the direction selective electrode method and creatinine. Creatinine concentration was determined by using the picric acid method in (ADICON Clinical Laboratory which is CAP accredited lab in China). Urine volume less than < 500 milliliter mL, or creatinine level less than < 3.81 mmol (mean-2SD: day/weight (kg)) for men and 4.57 mmol (mean-2SD: day/weight (kg)) for women were considered insufficient deficient to ensure the completeness of the urine sample. Inaccurate urine collections and extreme outliers for urinary creatinine level were excluded for from the analysis. Daily salt intake was estimated based on by calculation

- Formatted: English (U.K.)
- Formatted: No underline, Font color: Auto, English (U.K.)
- Formatted: No underline, Font color: Auto, English (U.K.)
- Formatted: English (U.K.)
- Formatted ... [56]
- Formatted ... [57]
- Formatted ... [58]
- Formatted ... [59]
- Formatted ... [60]
- Formatted ... [61]
- Formatted ... [62]
- Formatted ... [63]
- Formatted ... [64]
- Formatted ... [65]
- Formatted ... [66]
- Formatted ... [67]
- Formatted ... [68]
- Formatted ... [69]
- Formatted: No underline, English (U.K.)
- Formatted ... [70]
- Formatted ... [71]
- Formatted: English (U.K.)
- Formatted ... [72]
- Formatted: No underline, English (U.K.)
- Formatted ... [73]
- Formatted ... [74]
- Formatted ... [75]
- Formatted ... [76]
- Formatted ... [77]
- Formatted ... [78]
- Formatted ... [79]
- Formatted ... [80]
- Formatted ... [81]
- Formatted ... [82]
- Formatted ... [83]
- Formatted ... [84]
- Formatted ... [85]
- Formatted ... [86]
- Formatted ... [87]
- Formatted ... [88]

1  
2  
3  
4  
5  
6  
7  
8 ~~of~~ assessing 24-hour urinary sodium excretion based on the assumption that all sodium  
9 ~~was~~ ingested ~~was~~ in the form of sodium chloride.

Formatted [89]

12  
13  
14 ~~Physical measurements taken in all subjects included: height, weight, and waist~~  
15 circumference ~~were measured in all subjects~~. Of 2184 subjects, 2061 subjects ~~with~~  
16 complete data were included ~~for~~ in this analysis (response rate, 94.4%).

Formatted [90]

Formatted: English (U.K.)

20  
21  
22 The survey ~~received~~ ~~was granted~~ ethical approval ~~from~~ ~~by~~ the Ethics Committee of the  
23 Shandong ~~Center~~ ~~Centre~~ for Disease Control and ~~prevention~~ ~~Prevention~~, and ~~all~~  
24 participants provided written informed consent to participate in this study.

Formatted [91]

27  
28  
29 Educational level and annual household income were used as indicators for social  
30 economic status ~~(SES)~~. We divided participants into five groups ~~by~~ ~~based on~~ education  
31 ~~level~~ ~~level~~: no education, primary school, junior high school, senior high school, ~~or any~~  
32 college, and ~~above~~ ~~higher education~~. ~~Annual~~ ~~Annual~~ ~~Annual~~ household income ~~level~~ was  
33 classified ~~in~~ ~~into~~ high, middle, and low, according to tertiles. ~~Body Mass Index~~ ~~mass index~~  
34 (BMI, relative weight), ~~which is a simple measure of obesity, was calculated as measured~~  
35 ~~weight divided by measured~~ the square of height squared ( $\text{kg/m}^2$ ). ~~Overweight was~~  
36 ~~defined as~~ Individuals with  $24 \text{ kg/m}^2 \leq \text{BMI} < 28 \text{ kg/m}^2$ ; were defined as being  
37 ~~overweight and obese as~~ those with  $\text{BMI} \geq 28 \text{ kg/m}^2$  were considered obese.

Formatted [92]

Formatted: English (U.K.)

38  
39  
40  
41  
42  
43  
44  
45  
46  
47  
48  
49 Statistical analyses were performed ~~with~~ ~~using the~~ Statistical Analysis System (SAS);  
50 version 9.3 (SAS Institute; Inc); ~~Cary, North Carolina, USA~~.  $P < 0.05$  was considered  
51  
52  
53  
54  
55  
56  
57  
58  
59  
60

Formatted [93]

significant. All the results shown were weighted by the total demography in Shandong province. Survey weight (total weight = design weight  $\times$  post-stratification weight) was ~~applied~~ used to calculate weighted proportions. Design weight was calculated to account for different factors, including cluster design, strata, and individual. The population data ~~offrom~~ Shandong province was used to generate ~~the~~ post-stratification weight. Means and CI were calculated for all variables and the normality of the data was ~~echecked~~. Differences were tested by using ~~analysis~~ assessed. Analysis of variance and ~~Chi~~ chi-square test were used to test the significance of differences between groups.

Formatted

... [94]

## RESULTS

Formatted

... [95]

### Study subjects

Formatted

... [96]

A total of 2061 urine ~~specimens was~~ were eligible for ~~the~~ analysis and ~~51~~ were ~~excluded~~ out of which 51 samples that were inaccurate urine collections or extreme ~~outliers~~ ~~offor~~ urinary creatinine level were excluded. There was no significant ~~association~~ between ~~including samples and excluding samples on sample inclusion and~~ age, ~~gender~~ sex, and ~~urban or rural~~ residence ( $t = 1.31$ ,  $p > 0.05$ ; ~~Chi~~  $\chi^2$  square = ~~squaresquare~~ = 0.14,  $p > 0.05$ ; ~~Chi~~  $\chi^2$  square = ~~squaresquare~~ = 0.12,  $p > 0.05$ ). (Table 1).

Formatted

... [97]

The characteristics of each subpopulation ~~studied~~ are ~~summarized~~ summarised in ~~Table~~ table 2. Among ~~the~~ Of 2061 eligible samples, ~~there~~ 1076 were belonged to men, 4076 ~~men~~ male (52.21%) and 985 ~~women~~ to women (47.79%). The ~~average~~ mean age was

Formatted

... [98]

41.23 years, average height was 163.00 cm, average BMI was 24.22 kg/m<sup>2</sup>, and BMI was 24.22 kg/m<sup>2</sup>, respectively. There were no significant differences in age and BMI between males and females (t = 0.34, p > 0.05; vs. t = 0.29, p > 0.05). However, men were significantly taller than women (t = 37.65, p < 0.05). The prevalence of overweight and obese individuals was respectively 33.72% and 18.00%. There were no significant differences between males and females (Chi<sup>2</sup> = 0.90, p > 0.05; Chi<sup>2</sup> = 0.001, p > 0.05). Of the tested subjects, 82.90% residents had an income < 10,000 RMB, and 42.60% residents had a junior high school degree of education level.

Formatted [99]

### Salt intake

The 24-hour urinary sodium level ranged from 22.05 mmol to 750.79 mmol, the median was 231.10 mmol, Q3 was 258.44 mmol, and Q1 was 180.87 mmol.

Formatted [100]

Tables 3 and 4 show the 24-hour urinary sodium excretion and estimated daily salt intake for each subpopulation. The mean sodium level excreted of Na over 24 h was 237.61 mmol (95% CI: 224.77–250.44 mmol), respectively corresponding to 13.90 g NaCl (95% CI: 13.15–14.65 g). The mean salt intake by rural residents (14.00 g) was more than that of urban residents (14.00 g vs. 13.68 g; p < 0.01). Salt intake in men (14.40 g) was higher than that in women (14.40 g vs. 13.37 g; p < 0.01). There was

Formatted [101]

Formatted [102]



not were no obvious ~~difference among~~ differences in the salt intake between age groups.

Formatted

... [103]

## DISCUSSION

Formatted

... [104]

It can be very ~~hard~~ challenging to accurately estimate ~~Na~~sodium intake ~~accurately~~.

Formatted

... [105]

~~Certainly. Indeed,~~ it is very difficult to know the exact amount of salt added during

cooking (even in restaurants) and at the table. Further, it is hard to ~~know how much~~

~~estimate the amount of~~ salt that has been left on the plate, and ~~it can be very hard to~~

determine the salt content in food and drinking ~~water over time~~ [1]. Thus, in agreement

with ~~numerous authors~~ a number of reports [3, 1, 13], the best ~~way~~ method to determine

salt intake is ~~probably viably measuring~~ the amount excreted ~~in using a 24-hour~~ urine-

~~There sample.~~ In China, ~~have been~~ very few studies ~~on have~~ measured the salt intake

~~via using 24-hour urine sodium in China~~ urinary excretion, ~~and none has been~~ have been

performed ~~in using~~ a sample representative of the ~~entire~~ Chinese population ~~as a whole~~.

~~Longjian LIU. Liu et al.~~ reported an intake of 188.4 ~~mmol/d~~ mmol/day (corresponding to

~~11.02g~~ 10.2 g NaCl) in a population of 48–56-year-old individuals ~~olds~~ in China [14]; a

~~result~~; this value is much smaller than that obtained in the present study

(224.77 ~~mmol/24h~~ mmol/24 h, 13.9 ~~g~~ g). The ~~present~~ current study indicates that the

~~sodium~~ intake of Na is very high in a representative ~~group~~ population of Shandong

adults. ~~It is~~ higher than ~~that in a~~ UK population aged 19–64 years ~~in 2008~~ (148

mmol) [15]. Salt intake by men and women ~~are respectively~~ was found to be 246.23

mmol/24 ~~h~~ day and 228.52 mmol/24 ~~h~~ day, respectively, which ~~is they are~~ higher than

~~by that in~~ the population ~~in~~ Toyama [11] (Male: (men, 224 mmol/24h; Female: day;

women, 201 ~~mmol~~ mmol/24h) (day) [11, 16] and ~~by~~ the US [17] (Male: (men,



180–190 mmol/24h; Female:day; women, 130–150 mmol/24h)day) [17], and the UK [17] (Male:(men, 161 mmol/24h; Female:day; women, 127 mmol/24h)-day) [17].

Formatted ... [106]

~~It is in fact~~The salt intake in China is double the recommended intake of ~~not more than~~ 80–110 mmol ~~Na/d/day~~ (5–6 g salt/d)day) issued by ~~WHO~~the World Health Organisation in 1982 [18], ~~and since which has led to the then adoption of~~adopted, in the China Nutrition Recommendations [19]. In China, salt intake is higher, mainly ~~owed due~~ to the high consumption of soya sauce and the ~~custom~~tradition of adding a ~~lot~~large amount of salt to ~~the~~ food (both during cooking and at the table) [3, 20, 21]. As reported in ~~most of these~~several studies, salt intake in men (14.4g4 g) was higher ~~than~~than that in women (13.9g9 g) in Shandong, ~~perhaps possibly~~ because of ~~their~~the higher, overall ~~higher~~ food ~~intakes~~intake by men and ~~the~~ differences in food habits ~~between men and women~~ [3, 20, 22]. In ~~the vast~~majority of populations, salt intake is high and well above ~~the daily~~ recommended ~~daily intakes~~values. Now resident health records are being established in Shandong province, it is necessary to evaluate and record the salt intake for individuals ~~by FFQ or other method~~— Especially during following up the chronic patients and ~~it's~~ high risk population. During taking the national basic public health service, it is very important to ~~focus on the salt intake and persuade them to add the contents about salt reduction and to~~change the habit of high salt intake, ~~like persuading patients to give up smoking~~.

Formatted ... [107]

Formatted: No underline, Font color: Auto, Highlight

Formatted ... [108]

~~There is s~~Strongstrong and consistent evidence from animal studies, clinical trials, and epidemiological data ~~both from~~ within and across populations ~~implicating~~implicate high

Formatted ... [109]

salt intake as an important risk factor for high BP among both hypertensive and normotensive individuals; additionally, high salt intake is also associated with increased risk of ~~future CHD~~ coronary heart disease and stroke. Given ~~the~~ health problems, such as hypertension [23] and CVD [24], ~~are~~ associated with excessive salt intake, ~~it would appear that~~ public health initiatives are needed to ~~help~~ reduce ~~its~~ salt consumption [3,4] and consequently lower ~~CVD~~ the burden of CVD and increase life expectancy. ~~The government needs to focus and resolve this~~ ~~The severe situation should be drawn attention by the government~~ ~~Government Action on~~ ~~s~~ ~~Salt~~ ~~reduction must be undertaken.~~ ~~Health~~ ~~taken.~~ ~~is in charge of~~ ~~H~~ ~~health~~ education and promotion ~~by the~~ ~~using~~ for salt reduction, ~~by the~~ media campaign or other forms would to increase public awareness ~~campaigns,~~ as well as ~~There is therefore the opportunity for~~ timely community-based, ~~context specific~~ initiatives to limit the amount of salt added to food by individuals, ~~would increase public awareness.~~ Meanwhile, ~~it~~ is necessary to ~~engage~~ collaborate with ~~restaurant~~ ~~restaurants,~~ to reduce ~~the large amount~~ ~~excessive~~ of salt commonly included in ~~dish.~~ ~~Increasing westernization~~ ~~various dishes.~~ With increasing ~~westernisation~~ of cultures, it is ~~also~~ essential to ~~encourage~~ ~~ensure~~ low levels of salt ~~content~~ in processed foods. Such public health approaches can be simple, ~~low-ess~~ ~~costly~~ ~~cost~~ ~~cost~~ and effective. Indeed, ~~such a~~ ~~campaigns~~ ~~are~~ ~~is~~ ~~underway~~ in Shandong, promoted by the Shandong government and China MOH (~~Shandong & MOH Action on Salt and Hypertension (such as~~ ~~SMASH)~~ and the China Rural Health Initiative Sodium Reduction Study are already underway [25]. As ~~YAN LI~~ reported by Li et al [26] ~~put it that],~~ in China, ~~the~~ ~~measures~~ ~~on~~ ~~for~~ salt reduction will include government ~~leading~~ ~~initiatives,~~ health education and promotion, ~~extending~~ ~~promotion of~~ low sodium

|           |           |
|-----------|-----------|
| Formatted | ... [110] |
| Formatted | ... [111] |
| Formatted | ... [112] |
| Formatted | ... [113] |
| Formatted | ... [114] |
| Formatted | ... [115] |
| Formatted | ... [116] |
| Formatted | ... [117] |
| Formatted | ... [118] |
| Formatted | ... [119] |
| Formatted | ... [120] |
| Formatted | ... [121] |
| Formatted | ... [122] |
| Formatted | ... [123] |
| Formatted | ... [124] |
| Formatted | ... [125] |
| Formatted | ... [126] |
| Formatted | ... [127] |
| Formatted | ... [128] |
| Formatted | ... [129] |
| Formatted | ... [130] |
| Formatted | ... [131] |
| Formatted | ... [132] |
| Formatted | ... [133] |
| Formatted | ... [134] |
| Formatted | ... [135] |
| Formatted | ... [136] |
| Formatted | ... [137] |
| Formatted | ... [138] |
| Formatted | ... [139] |
| Formatted | ... [140] |
| Formatted | ... [141] |
| Formatted | ... [142] |
| Formatted | ... [143] |
| Formatted | ... [144] |
| Formatted | ... [145] |
| Formatted | ... [146] |
| Formatted | ... [147] |
| Formatted | ... [148] |
| Formatted | ... [149] |
| Formatted | ... [150] |
| Formatted | ... [151] |

1  
2  
3  
4  
5  
6  
7  
8  
9  
10  
11  
12  
13  
14  
15  
16  
17  
18  
19  
20  
21  
22  
23  
24  
25  
26  
27  
28  
29  
30  
31  
32  
33  
34  
35  
36  
37  
38  
39  
40  
41  
42  
43  
44  
45  
46  
47  
48  
49  
50  
51  
52  
53  
54  
55  
56  
57  
58  
59  
60

~~salt in promoting the food processing companies and restaurants less salt, etc. In Shandong, education public education by TV through radio, television, internet, film, broadcasting, etc and movies is underway to improve the level knowledge of the residents on about low salt diet knowledge diets. To enact behavior change bring about behavioural changes, salt spoons are have been provided for every family in the whole entire province. The key Key groups are trained such as comprising of governors, medical staff, personnel, and stakeholders from the food processing enterprise and restaurant. Some local restaurants are trained. Local standards about for the amount of salt volume in the Shandong cuisine and soy sauce pickles are and other dishes in the cuisine of Shandong have been formulated. The results off from the present study may could be useful in its endeavor these endeavours.~~

~~There is were some limitation was some limitation of are certain limitations in this study. First, the sample only included Chinese adults aged 18–69 years, so, hence, the results are not cannot be, extrapolating extrapolated extrapolate extrapolating to other groups. Because behavior behaviour is formed during childhood, salt intake among them should be evaluated and health education should cover them be administered during this period. Second, in short of available available available and exact the data on physics, 24-h 24h urinary salt excretion method does not account for electrolyte loss via routes other than via the kidneys, such as the skin and respiratory tract, etc, and therefore will therefore tend to slightly underestimate the true intake.~~

Formatted [152]

Formatted: No underline, Font color: Auto, English (U.K.)

Formatted: No underline, Font color: Auto

Formatted [153]

Formatted: Tab stops: 3.05", Left

Formatted: No underline, Font color: Auto, English (U.S.)

Formatted [154]

Formatted: No underline, Font color: Auto, English (U.S.)

Formatted [155]

Formatted: No underline, Font color: Auto, English (U.S.)

Formatted [156]

Formatted [157]

Formatted [158]

Formatted: No underline, Font color: Auto, English (U.S.)

Formatted: No underline, Font color: Auto, English (U.K.)

Formatted: No underline, Font color: Auto, English (U.S.)

Formatted: No underline, Font color: Auto, English (U.K.)

Formatted: No underline, Font color: Auto, English (U.S.)

Formatted: English (U.K.)



1  
2  
3  
4  
5  
6  
7  
8  
9  
10  
11  
12  
13  
14  
15  
16  
17  
18  
19  
20  
21  
22  
23  
24  
25  
26  
27  
28  
29  
30  
31  
32  
33  
34  
35  
36  
37  
38  
39  
40  
41  
42  
43  
44  
45  
46  
47  
48  
49  
50  
51  
52  
53  
54  
55  
56  
57  
58  
59  
60

~~The survey received ethical approval from~~was approved by the Ethics Committee of the Shandong ~~Center~~Centre for Disease Control and ~~prevention~~Prevention, China.

**Data sharing statement**

No additional data available.

- Formatted: No underline, Font color: Auto, English (U.K.)
- Formatted: No underline, Font color: Auto, English (U.K.)
- Formatted: No underline, Font color: Auto, English (U.K.)
- Formatted: No underline, Font color: Auto, English (U.K.)
- Formatted: English (U.K.)
- Formatted: No underline, Font color: Auto, English (U.K.)
- Formatted: No underline, Font color: Auto, English (U.K.)
- Formatted: English (U.K.)
- Formatted: No underline, Font color: Auto, English (U.K.)

For peer review only

## REFERENCES

1. Ministry of Health. (2010) Annual Report on Health Statistics. Beijing: Peking Union

Medical College Publishing House.

2. China CDC & China News. (2011) Salt reduction and hypertension prevention. China

3. Brown IJ, Tzoulaki I, Candeias V, et al. (2009) Salt intakes around the world:

implications for public health international. *Int J Epidemiol* 38, 791–813.

4. He FJ, MacGregor GA. (2009) A comprehensive review on salt and health and current

experience of worldwide salt reduction programs. *J Hum Hypertens* 23, 363–384.

5. Hoffmann IS, Cubeddu LX. (2009) Salt and the metabolic syndrome. *Nutr Metab*

Cardiovasc Dis 19, 123–128.

6. Strazzullo P, D'Elia L, Kandala NB, et al. (2009) Salt intake, stroke and cardiovascular

disease: meta-analysis of prospective studies. *BMJ* 339, b4567.

7. Bibbins-Domingo K, Chertow GM, Coxson PG, et al. (2010) Projected effect of

dietary salt reductions on future cardiovascular disease. *N Engl J Med* 362, 590–599.

9. Beaglehole R, Bonita R, Horton R, et al. (2011) Priority actions for the non-communicable

disease crisis. *Lancet* 377: 1438-1447.

10. Chan WG. Salt reduction initiatives in developed countries and lessons for China: a

systematic review. Available at <http://hdl.handle.net/10722/145711>. Accessed 15

August 2012.

11. Centers for Disease Control and Prevention. (2012) CDC Grand Rounds: Dietary

sodium reduction-time for choice. *MMWR*: 61(05), 89-91.

12. Anderson CA, Appel LJ, Okuda N, et al. (2010) Dietary source of sodium in China,

Formatted: English (U.K.)

Formatted: No underline, Font color: Auto, English (U.K.)

Formatted: English (U.K.)

Formatted: No underline, Font color: Auto, English (U.K.)

Formatted: English (U.K.)

Formatted: No underline, Font color: Auto, English (U.K.)

Formatted: English (U.K.)

Formatted: No underline, Font color: Auto, English (U.K.)

Formatted: Font: Bold, No underline, Font color: Auto, English (U.K.)

Formatted: No underline, Font color: Auto, English (U.K.)

Formatted: English (U.K.)

Formatted: No underline, Font color: Auto, English (U.K.)

Formatted: English (U.K.)

Formatted: No underline, Font color: Auto, English (U.K.)

Formatted: English (U.K.)

Formatted: No underline, Font color: Auto, English (U.K.)

Formatted: English (U.K.)

Formatted: No underline, Font color: Auto, English (U.K.)

Formatted: English (U.K.)

Formatted: No underline, Font color: Auto, English (U.K.)

Formatted: Font: 10.5 pt, No underline, Font color: Auto, English (U.K.)

Formatted: No underline, Font color: Auto, English (U.K.)

Formatted: English (U.K.)

Formatted: No underline, Font color: Auto, English (U.K.)

Formatted: English (U.K.)

Formatted: No underline, Font color: Auto, English (U.K.)

Formatted: English (U.K.)

Formatted: No underline, Font color: Auto, English (U.K.)

Formatted: English (U.K.)

Formatted: No underline, Font color: Auto, English (U.K.)

Japan, the United Kingdom, the United States, women and men aged 40 to 59 years: the

INTERMAP study. *Journal of the American Dietetic Association* 110(5): 736-745.

Formatted: English (U.K.)

13. Hunter D. (1998) Biochemical indicators of dietary intake. In *Nutritional Epidemiology*, pp. 174–243 [W Willett, editor]. Oxford: Oxford University Press.

Formatted: No underline, Font color: Auto, English (U.K.)

Formatted: English (U.K.)

14. Longjian LIU, Katsumi IKEDA, and Yukio YAMORI. (2000) Twenty-four Hour Urinary Sodium and 3-Methylhistidine Excretion in Relation to Blood pressure in Chinese: Results from the China-Japan Cooperative Research for the WHO-CARDIAC study. *Hypertens Res* 23, 152-157.

Formatted: No underline, Font color: Auto, English (U.K.)

Formatted: English (U.K.)

15. National Centre for Social Research. An assessment of dietary sodium levels among adults (aged 19–64) in the UK general population in 2008, based on analysis of dietary sodium in 24 hour urine samples. UK: Food Standards Agency, 2008.

Formatted: No underline, Font color: Auto, English (U.K.)

Formatted: English (U.K.)

16. Rose G, Stamler J. The INTERSALT Study: background, methods and main results. *J Hum Hypertens* 1989; 3:283–88.

Formatted: No underline, Font color: Auto, English (U.K.)

Formatted: English (U.K.)

17. Stamler J, Elliott P, Chan Q, for the INTERMAP Research Group (2003b). INTERMAP appendix tables. *J Hum Hypertens*, 17:655–775.

Formatted: No underline, Font color: Auto, English (U.K.)

Formatted: English (U.K.)

18 WHO Expert Committee (1982) Prevention of Coronary Heart Disease. WHO Technical Report Series no. 678. Geneva: WHO.

Formatted: No underline, Font color: Auto, English (U.K.)

Formatted: English (U.K.)

19. Chinese Nutrition Society (2007). The Dietary Guidelines for Chinese Residents. Tibet, China: Tibetan People's Publishing House, 55.

Formatted: No underline, Font color: Auto, English (U.K.)

Formatted: No underline, Font color: Auto, English (U.K.)

20. Zhou BF, Stamler J, Dennis B, et al. (2003) INTERMAP Research Group Nutrient intakes of middle-aged men and women in China, Japan, United Kingdom, and United States in the late 1990s: the INTERMAP Study. *J Hum Hypertens* 17, 623–630.

Formatted: English (U.K.)

Formatted: No underline, Font color: Auto, English (U.K.)

Formatted: English (U.K.)

21. Liu L, Liu L, Ding Y, et al. (2001) Ethnic and environmental differences in various

Formatted: No underline, Font color: Auto, English (U.K.)



1  
2  
3  
4  
5  
6  
7  
8 markers of dietary intake and blood pressure among Chinese Han and three other  
9 minority peoples of China: results from the WHO Cardiovascular Diseases and  
10 Alimentary Comparison (CARDIAC) Study. *Hypertens Res Clin Exp* 24, 315–322.

Formatted: English (U.K.)

11  
12  
13  
14 22. Hoffmann IS & Cubeddu LX (2009) Salt and the metabolic syndrome. *Nutr Metab*  
15 *Cardiovasc Dis* 19, 123–128.

Formatted: No underline, Font color: Auto, English (U.K.)

Formatted: English (U.K.)

16  
17  
18 23. Luft FC (1998) Salt and hypertension at the close of the millenium. *Wien Klin*  
19 *Wochenschr* 110, 459–466.

Formatted: No underline, Font color: Auto, English (U.K.)

Formatted: English (U.K.)

20  
21  
22 24. Hooper L, Bartlett C, Davey Smith G, et al. (2003) Reduced dietary salt for  
23 prevention of cardiovascular disease. *The Cochrane Database of Systematic Reviews*  
24 2003, issue 3 CD003656.

Formatted: No underline, Font color: Auto, English (U.K.)

Formatted: English (U.K.)

25  
26  
27  
28 25. Li N, Yan LL, Niu W, et al. (2013) [A large-scale cluster randomized trial to determine](#)  
29 [the effects of community-based dietary sodium reduction--the China Rural Health](#)  
30 [Initiative Sodium Reduction Study](#). *Am Heart J*.166(5):815-22.

Formatted: No underline, Font color: Auto, English (U.K.)

Formatted: Font: 10.5 pt, No underline, Font color: Auto, English (U.K.)

Formatted: No underline, Font color: Auto, English (U.K.)

31  
32  
33  
34 26. YAN Li, LI Yan, WU Yang-fen. (2011) [Reducing salt intake for hypertension control:](#)  
35 [related evidence and recommendation on strategies in China](#). *Chin J Epidemiol*  
36 *32(12):1188-1191.*

Formatted: English (U.K.)

Formatted: No underline, Font color: Auto, English (U.K.)

Formatted: English (U.K.)

Formatted: Font: Not Bold

Formatted: Justified

Formatted: No underline, Font color: Auto, English (U.K.)



**Table 1 Test of goodness of fit between including and excluding study population**

| Gender        | Including sample |              |            |              |             |              | Excluding sample |              |           |              |           |              |
|---------------|------------------|--------------|------------|--------------|-------------|--------------|------------------|--------------|-----------|--------------|-----------|--------------|
|               | Total            |              | Urban      |              | Rural       |              | Total            |              | Urban     |              | Rural     |              |
|               | n                | %            | n          | %            | n           | %            | n                | %            | n         | %            | n         | %            |
| Male          | 13.63            | 85           | 4.12       | 196          | 9.51        | 15           | 29.41            | 6            | 11.76     | 9            | 17.65     |              |
| —             | 13.39            | 91           | 4.42       | 185          | 8.98        | 6            | 11.76            | 0            | 0         | 6            | 11.76     |              |
| —             | 9.9              | 65           | 3.15       | 139          | 6.74        | 1            | 1.96             | 1            | 1.96      | 0            | 0         |              |
| —             | 7.86             | 51           | 2.47       | 111          | 5.39        | 2            | 3.92             | 0            | 0         | 2            | 3.92      |              |
| —             | 7.42             | 50           | 2.43       | 103          | 5           | 4            | 7.84             | 0            | 0         | 4            | 7.84      |              |
| <b>Male</b>   | <b>1076</b>      | <b>52.21</b> | <b>342</b> | <b>16.59</b> | <b>734</b>  | <b>35.61</b> | <b>28</b>        | <b>54.9</b>  | <b>7</b>  | <b>13.73</b> | <b>21</b> | <b>41.18</b> |
| Female        | 12.23            | 79           | 3.83       | 173          | 8.39        | 10           | 19.61            | 3            | 5.88      | 7            | 13.73     |              |
| —             | 11.84            | 79           | 3.83       | 165          | 8.01        | 4            | 7.84             | 1            | 1.96      | 3            | 5.88      |              |
| —             | 9.22             | 59           | 2.86       | 131          | 6.36        | 2            | 3.92             | 0            | 0         | 2            | 3.92      |              |
| —             | 7.96             | 53           | 2.57       | 111          | 5.39        | 3            | 5.88             | 2            | 3.92      | 1            | 1.96      |              |
| —             | 6.55             | 41           | 1.99       | 94           | 4.56        | 4            | 7.84             | 2            | 3.92      | 2            | 3.92      |              |
| <b>Female</b> | <b>985</b>       | <b>47.79</b> | <b>311</b> | <b>15.09</b> | <b>674</b>  | <b>32.7</b>  | <b>23</b>        | <b>45.1</b>  | <b>8</b>  | <b>15.69</b> | <b>15</b> | <b>29.41</b> |
| <b>Total</b>  | <b>533</b>       | <b>25.86</b> | <b>164</b> | <b>7.96</b>  | <b>369</b>  | <b>17.9</b>  | <b>25</b>        | <b>49.02</b> | <b>9</b>  | <b>17.65</b> | <b>16</b> | <b>31.37</b> |
| —             | 520              | 25.23        | 170        | 8.25         | 350         | 16.98        | 10               | 19.61        | 1         | 1.96         | 9         | 17.65        |
| —             | 394              | 19.12        | 124        | 6.02         | 270         | 13.1         | 3                | 5.88         | 1         | 1.96         | 2         | 3.92         |
| —             | 326              | 15.82        | 104        | 5.05         | 222         | 10.77        | 5                | 9.8          | 2         | 3.92         | 3         | 5.88         |
| —             | 288              | 13.97        | 91         | 4.42         | 197         | 9.56         | 8                | 15.69        | 2         | 3.92         | 6         | 11.76        |
| <b>Total</b>  | <b>2061</b>      | <b>100</b>   | <b>653</b> | <b>31.68</b> | <b>1408</b> | <b>68.32</b> | <b>51</b>        | <b>100</b>   | <b>15</b> | <b>29.41</b> | <b>36</b> | <b>70.59</b> |

- Formatted [167]
- Formatted [171]
- Formatted [172]
- Formatted [168]
- Formatted [174]
- Formatted [175]
- Formatted Table [169]
- Formatted [170]
- Formatted [173]
- Formatted [176]
- Formatted [177]
- Formatted [178]
- Formatted [179]
- Formatted [180]
- Formatted [181]
- Formatted [182]
- Formatted [183]
- Formatted [184]
- Formatted [185]
- Formatted [186]
- Formatted [187]
- Formatted [188]
- Formatted [189]
- Formatted [190]
- Formatted Table [191]
- Formatted [192]
- Formatted [193]
- Formatted [194]
- Formatted [195]
- Formatted [196]
- Formatted [197]
- Formatted [198]
- Formatted [199]
- Formatted [200]
- Formatted [201]
- Formatted [202]
- Formatted [203]
- Formatted [204]
- Formatted Table [205]
- Formatted [206]
- Formatted [207]
- Formatted [208]
- Formatted [209]
- Formatted [210]
- Formatted [211]
- Formatted [212]
- Formatted [213]
- Formatted [214]
- Formatted [215]
- Formatted [216]
- Formatted [217]
- Formatted [218]
- Formatted [219]
- Formatted [220]
- Formatted [221]
- Formatted [222]

**Table 2 Personal characteristics of the study sample by sex and age**

|                          | Total(n=2061) |       |        | Male(n=1076) |       |        | Female(n=985) |       |        |
|--------------------------|---------------|-------|--------|--------------|-------|--------|---------------|-------|--------|
|                          | Mean          | SD    | Median | Mean         | SD    | Median | Mean          | SD    | Median |
| Age(years)               | 41.23         | 13.99 | 39.00  | 41.12        | 14.32 | 39.00  | 41.34         | 13.62 | 39.00  |
| Height(cm)               | 163.00        | 8.84  | 162.60 | 168.78       | 7.02  | 169.20 | 157.27        | 6.23  | 157.20 |
| BMI (kg/m <sup>2</sup> ) | 24.53         | 3.90  | 24.22  | 24.55        | 3.90  | 24.25  | 24.51         | 3.90  | 24.25  |
| Overweight (%)           | 33.72         |       | 34.67  |              |       | 32.69  |               |       |        |
| Obese (%)                | 18.00         |       | 18.03  |              |       | 17.97  |               |       |        |
| Income (Yuan,%)          |               |       |        |              |       |        |               |       |        |
| <5000                    | 52.24         |       | 51.1   |              |       | 53.45  |               |       |        |
| 5000-                    | 30.66         |       | 31.4   |              |       | 29.87  |               |       |        |
| 10000-                   | 8.35          |       | 8.27   |              |       | 8.44   |               |       |        |
| 15000-                   | 5.45          |       | 5.64   |              |       | 5.25   |               |       |        |

- Formatted ... [234]
- Formatted ... [235]
- Formatted ... [236]
- Formatted ... [237]
- Formatted ... [238]
- Formatted ... [239]
- Formatted ... [240]
- Formatted ... [241]
- Formatted ... [242]
- Formatted ... [243]
- Formatted ... [244]
- Formatted ... [245]
- Formatted ... [246]
- Formatted ... [247]
- Formatted ... [248]
- Formatted ... [249]
- Formatted ... [250]
- Formatted ... [251]
- Formatted ... [252]
- Formatted ... [253]
- Formatted ... [254]
- Formatted ... [255]
- Formatted ... [256]
- Formatted ... [257]
- Formatted ... [258]
- Formatted ... [259]
- Formatted ... [260]
- Formatted ... [261]
- Formatted ... [262]
- Formatted ... [263]
- Formatted ... [264]
- Formatted ... [265]
- Formatted ... [266]
- Formatted ... [267]
- Formatted ... [268]
- Formatted ... [269]
- Formatted ... [270]
- Formatted ... [271]
- Formatted ... [272]
- Formatted ... [273]
- Formatted ... [274]
- Formatted ... [275]
- Formatted ... [276]
- Formatted ... [277]
- Formatted ... [278]
- Formatted ... [279]
- Formatted ... [280]
- Formatted ... [281]
- Formatted ... [282]
- Formatted ... [283]
- Formatted ... [284]
- Formatted ... [285]
- Formatted ... [286]
- Formatted ... [287]
- Formatted ... [288]
- Formatted ... [289]

1  
2  
3  
4  
5  
6  
7  
8  
9  
10  
11  
12  
13  
14  
15  
16  
17  
18  
19  
20  
21  
22  
23  
24  
25  
26  
27  
28  
29  
30  
31  
32  
33  
34  
35  
36  
37  
38  
39  
40  
41  
42  
43  
44  
45  
46  
47  
48  
49  
50  
51  
52  
53  
54  
55  
56  
57  
58  
59  
60

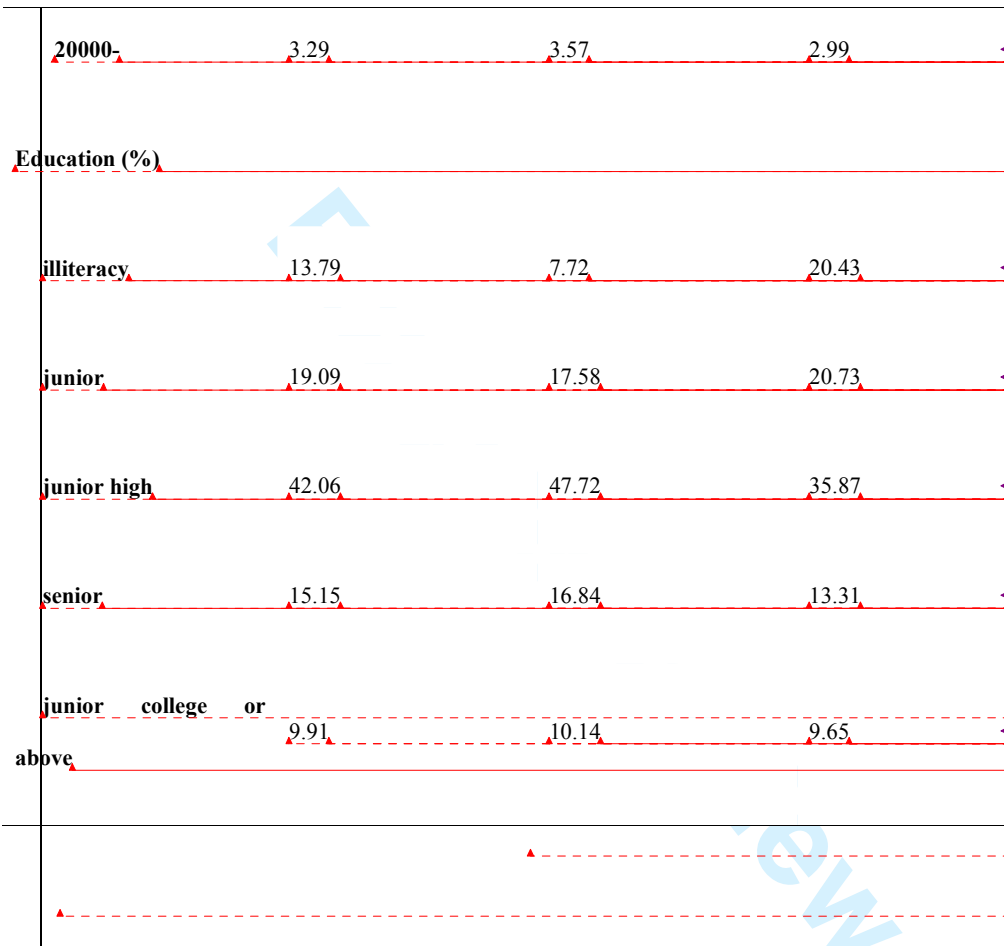

- Formatted [314]
- Formatted: No underline, Font color: Auto, English (U.K.)
- Formatted: Font: 10.5 pt, Not Bold, English (U.K.)
- Formatted [315]
- Formatted [316]
- Formatted: Justified, Space Before: 0 pt, After: 0 pt, Don't keep with next, Don't keep lines together
- Formatted [317]
- Formatted [318]
- Formatted [319]
- Formatted [320]
- Formatted [321]
- Formatted [322]
- Formatted [323]
- Formatted [324]
- Formatted [325]
- Formatted [326]
- Formatted [327]
- Formatted [328]
- Formatted [329]
- Formatted [330]
- Formatted [331]
- Formatted [332]
- Formatted [333]
- Formatted [334]
- Formatted [335]
- Formatted [336]
- Formatted [337]
- Formatted [338]
- Formatted [339]
- Formatted [340]
- Formatted [341]
- Formatted [342]
- Formatted [343]
- Formatted [344]
- Formatted [345]
- Formatted [346]
- Formatted [347]
- Formatted: English (U.K.)
- Formatted [348]

**Table3 Urinary sodium excretion of Shandong adults aged 18-69 in 2011**

**(Weighted mean,SD, 95% CI, mmol/24h)**

| Gender | Age-group | Urban |        |        | Rural  |        |        | Total  |        |        |        |        |        |        |        |        |
|--------|-----------|-------|--------|--------|--------|--------|--------|--------|--------|--------|--------|--------|--------|--------|--------|--------|
|        |           | N     | Mean   | 95% CI | N      | Mean   | 95% CI | N      | Mean   |        |        |        |        |        |        |        |
| Male   | 18-29     | 85    | 241.64 | 18.23  | 194.77 | 288.51 | 196    | 244.81 | 9.85   | 222.52 | 267.10 | 281    | 243.88 | 8.72   | 225.11 | 267.10 |
|        | 30-39     | 91    | 255.88 | 12.30  | 224.25 | 287.50 | 185    | 247.19 | 9.72   | 225.21 | 269.17 | 276    | 249.99 | 7.79   | 223.31 | 269.17 |
|        | 40-49     | 65    | 233.33 | 17.89  | 187.35 | 279.31 | 139    | 247.90 | 7.48   | 230.99 | 264.82 | 204    | 243.59 | 7.40   | 227.72 | 264.82 |
|        | 50-59     | 51    | 263.00 | 12.72  | 230.28 | 295.71 | 111    | 251.36 | 12.64  | 222.78 | 279.95 | 162    | 255.27 | 9.44   | 233.01 | 279.95 |
|        | 60-69     | 50    | 239.00 | 14.74  | 201.12 | 276.88 | 103    | 232.24 | 12.62  | 203.69 | 260.79 | 153    | 234.42 | 9.82   | 227.33 | 260.79 |
|        | Subtotal  |       | 342    | 246.81 | 12.46  | 214.77 | 278.85 | 734    | 245.96 | 8.22   | 227.38 | 264.55 | 1076   | 246.23 | 6.87   | 227.33 |
| Female | 18-29     | 79    | 200.77 | 13.37  | 166.40 | 235.14 | 173    | 225.93 | 7.26   | 209.51 | 242.35 | 252    | 219.01 | 6.69   | 218.61 | 242.35 |
|        | 30-39     | 79    | 236.43 | 8.99   | 213.31 | 259.54 | 165    | 234.70 | 9.62   | 212.94 | 256.46 | 244    | 235.27 | 7.11   | 227.00 | 256.46 |
|        | 40-49     | 59    | 236.92 | 12.94  | 203.65 | 270.18 | 131    | 231.88 | 12.22  | 204.25 | 259.52 | 190    | 233.46 | 9.43   | 227.22 | 259.52 |
|        | 50-59     | 53    | 213.23 | 10.24  | 186.91 | 239.54 | 111    | 245.28 | 11.41  | 219.48 | 271.09 | 164    | 234.73 | 8.73   | 227.22 | 271.09 |
|        | 60-69     | 41    | 200.29 | 11.23  | 171.42 | 229.15 | 94     | 221.79 | 7.72   | 204.32 | 239.26 | 135    | 215.48 | 6.34   | 227.22 | 239.26 |
|        | Subtotal  |       | 311    | 219.97 | 9.07   | 196.66 | 243.29 | 674    | 232.32 | 7.72   | 214.85 | 249.79 | 985    | 228.52 | 5.99   | 227.22 |
| Total  | 18-29     | 164   | 222.94 | 10.65  | 195.56 | 250.32 | 369    | 235.72 | 7.63   | 218.46 | 252.98 | 533    | 232.08 | 6.15   | 227.22 | 252.98 |
|        | 30-39     | 170   | 246.19 | 9.86   | 220.85 | 271.54 | 350    | 241.06 | 9.11   | 220.44 | 261.68 | 520    | 242.73 | 6.98   | 227.22 | 261.68 |
|        | 40-49     | 124   | 235.11 | 12.06  | 204.10 | 266.11 | 270    | 240.30 | 8.95   | 220.05 | 260.56 | 394    | 238.72 | 7.16   | 227.22 | 260.56 |
|        | 50-59     | 104   | 238.44 | 7.54   | 219.05 | 257.83 | 222    | 248.32 | 9.26   | 227.36 | 269.27 | 326    | 245.03 | 6.68   | 227.22 | 269.27 |
|        | 60-69     | 91    | 220.68 | 12.40  | 188.80 | 252.56 | 197    | 226.94 | 8.61   | 207.45 | 246.43 | 288    | 225.01 | 7.05   | 227.22 | 246.43 |
|        | Subtotal  |       | 653    | 233.82 | 9.90   | 208.36 | 259.28 | 1408   | 239.30 | 7.52   | 222.28 | 256.33 | 2061   | 237.61 | 5.98   | 227.22 |

1  
2  
3  
4  
5  
6  
7  
8  
9  
10  
11  
12  
13  
14  
15  
16  
17  
18  
19  
20  
21  
22  
23  
24  
25  
26  
27  
28  
29  
30  
31  
32  
33  
34  
35  
36  
37  
38  
39  
40  
41  
42  
43  
44  
45  
46  
47  
48  
49  
50  
51  
52  
53  
54  
55  
56  
57  
58  
59  
60

|       |          |     |        |        |        |      |        |        |        |      |        |        |        |
|-------|----------|-----|--------|--------|--------|------|--------|--------|--------|------|--------|--------|--------|
| —     | 40-49    | 59  | 236.92 | 203.65 | 270.18 | 131  | 231.88 | 204.25 | 259.52 | 190  | 233.46 | 213.24 | 253.69 |
| —     | 50-59    | 53  | 213.23 | 186.91 | 239.54 | 111  | 245.28 | 219.48 | 271.09 | 164  | 234.73 | 216.01 | 253.45 |
| —     | 60-69    | 41  | 200.29 | 171.42 | 229.15 | 94   | 221.79 | 204.32 | 239.26 | 135  | 215.48 | 201.88 | 229.07 |
|       | Subtotal | 311 | 219.97 | 196.66 | 243.29 | 674  | 232.32 | 214.85 | 249.79 | 985  | 228.52 | 215.67 | 241.37 |
| Total | 18-29    | 164 | 222.94 | 195.56 | 250.32 | 369  | 235.72 | 218.46 | 252.98 | 533  | 232.08 | 218.89 | 245.26 |
|       | 30-39    | 170 | 246.19 | 220.85 | 271.54 | 350  | 241.06 | 220.44 | 261.68 | 520  | 242.73 | 227.75 | 257.71 |
|       | 40-49    | 124 | 235.11 | 204.10 | 266.11 | 270  | 240.30 | 220.05 | 260.56 | 394  | 238.72 | 223.37 | 254.07 |
|       | 50-59    | 104 | 238.44 | 219.05 | 257.83 | 222  | 248.32 | 227.36 | 269.27 | 326  | 245.03 | 230.70 | 259.37 |
|       | 60-69    | 91  | 220.68 | 188.80 | 252.56 | 197  | 226.94 | 207.45 | 246.43 | 288  | 225.01 | 209.89 | 240.14 |
|       | Subtotal | 653 | 233.82 | 208.36 | 259.28 | 1408 | 239.30 | 222.28 | 256.33 | 2061 | 237.61 | 224.77 | 250.44 |

Formatted: No underline, Font color: Auto, English (U.K.)

Table 4 Salt intake of Shandong adults aged 18-69 in 2011

(Weighted mean, SD, 95% CI, grams/24h)

| Gender | Age-group | Urban |       |      |             | Rural |       |      |             | Total |       |      |             |
|--------|-----------|-------|-------|------|-------------|-------|-------|------|-------------|-------|-------|------|-------------|
|        |           | N     | Mean  | SD   | 95% CI      | N     | Mean  | SD   | 95% CI      | N     | Mean  | SD   | 95% CI      |
| Male   | 18-29     | 85    | 14.14 | 1.07 | 11.39-16.88 | 196   | 14.32 | 0.58 | 13.02-15.63 | 281   | 14.27 | 0.51 | 13.17-15.37 |
|        | 30-39     | 91    | 14.97 | 0.72 | 13.12-16.82 | 185   | 14.46 | 0.57 | 13.17-15.75 | 276   | 14.62 | 0.46 | 13.57-15.67 |
|        | 40-49     | 65    | 13.65 | 1.05 | 10.96-16.34 | 139   | 14.50 | 0.44 | 13.51-15.49 | 204   | 14.25 | 0.43 | 13.19-15.31 |
|        | 50-59     | 51    | 15.39 | 0.74 | 13.47-17.30 | 111   | 14.70 | 0.74 | 13.03-16.38 | 162   | 14.93 | 0.55 | 13.82-16.04 |
|        | 60-69     | 50    | 13.98 | 0.86 | 11.77-16.20 | 103   | 13.59 | 0.74 | 11.92-15.26 | 153   | 13.71 | 0.57 | 12.57-14.85 |
|        | Subtotal  | 342   | 14.44 | 0.73 | 12.56-16.31 | 734   | 14.39 | 0.48 | 13.30-15.48 | 1076  | 14.40 | 0.40 | 13.60-15.20 |
| Female | 18-29     | 79    | 11.75 | 0.78 | 9.73-13.76  | 173   | 13.22 | 0.42 | 12.26-14.18 | 252   | 12.81 | 0.39 | 11.99-13.63 |
|        | 30-39     | 79    | 13.83 | 0.53 | 12.48-15.18 | 165   | 13.73 | 0.56 | 12.46-15.00 | 244   | 13.76 | 0.42 | 12.92-14.60 |
|        | 40-49     | 59    | 13.86 | 0.76 | 11.91-15.81 | 131   | 13.57 | 0.71 | 11.95-15.18 | 190   | 13.66 | 0.55 | 12.56-14.76 |
|        | 50-59     | 53    | 12.47 | 0.60 | 10.93-14.01 | 111   | 14.35 | 0.67 | 12.84-15.86 | 164   | 13.73 | 0.51 | 12.71-14.75 |
|        | 60-69     | 41    | 11.72 | 0.66 | 10.03-13.41 | 94    | 12.97 | 0.45 | 11.95-14.00 | 135   | 12.61 | 0.37 | 11.87-13.35 |
|        | Subtotal  | 311   | 12.87 | 0.53 | 11.50-14.23 | 674   | 13.59 | 0.45 | 12.57-14.61 | 985   | 13.37 | 0.35 | 12.62-14.12 |
| Total  | 18-29     | 164   | 13.04 | 0.62 | 11.44-14.64 | 369   | 13.79 | 0.45 | 12.78-14.80 | 533   | 13.58 | 0.36 | 12.87-14.29 |
|        | 30-39     | 170   | 14.40 | 0.58 | 12.92-15.89 | 350   | 14.10 | 0.53 | 12.90-15.31 | 520   | 14.20 | 0.41 | 13.38-15.02 |
|        | 40-49     | 124   | 13.75 | 0.71 | 11.94-15.57 | 270   | 14.06 | 0.52 | 12.87-15.24 | 394   | 13.97 | 0.42 | 13.15-14.79 |
|        | 50-59     | 104   | 13.95 | 0.44 | 12.81-15.08 | 222   | 14.53 | 0.54 | 13.30-15.75 | 326   | 14.33 | 0.39 | 13.54-15.12 |
|        | 60-69     | 91    | 12.91 | 0.73 | 11.05-14.77 | 197   | 13.28 | 0.50 | 12.14-14.42 | 288   | 13.16 | 0.41 | 12.15-14.17 |
|        | Subtotal  | 653   | 13.68 | 0.58 | 12.19-15.17 | 1408  | 14.00 | 0.44 | 13.00-15.00 | 2061  | 13.90 | 0.35 | 13.19-14.61 |

- Formatted ... [671]
- Formatted ... [672]
- Formatted ... [675]
- Formatted ... [676]
- Formatted ... [677]
- Formatted ... [673]
- Formatted ... [674]
- Formatted ... [678]
- Formatted ... [679]
- Formatted ... [680]
- Formatted ... [681]
- Formatted ... [682]
- Formatted ... [683]
- Formatted ... [684]
- Formatted ... [685]
- Formatted ... [686]
- Formatted ... [687]
- Formatted ... [688]
- Formatted ... [689]
- Formatted ... [690]
- Formatted ... [691]
- Formatted ... [692]
- Formatted ... [693]
- Formatted ... [694]
- Formatted ... [695]
- Formatted ... [696]
- Formatted ... [697]
- Formatted ... [698]
- Formatted ... [699]
- Formatted ... [700]
- Formatted ... [701]
- Formatted ... [702]
- Formatted ... [703]
- Formatted ... [704]
- Formatted ... [705]
- Formatted ... [706]
- Formatted ... [707]
- Formatted ... [708]
- Formatted ... [709]
- Formatted ... [710]
- Formatted ... [711]
- Formatted ... [712]
- Formatted ... [713]
- Formatted ... [714]
- Formatted ... [715]
- Formatted ... [716]
- Formatted ... [717]
- Formatted ... [718]
- Formatted ... [719]
- Formatted ... [720]
- Formatted ... [721]
- Formatted ... [722]
- Formatted ... [723]
- Formatted ... [724]
- Formatted ... [725]
- Formatted ... [726]

1  
2  
3  
4  
5  
6  
7  
8  
9  
10  
11 **Page 3: [1] Formatted** 作者 5/28/2014 9:46:00 PM

12 English (U.K.)

13  
14 **Page 3: [2] Formatted** 作者 5/28/2014 9:46:00 PM

15 No underline, Font color: Auto, English (U.K.)

16  
17 **Page 3: [3] Formatted** Windows 用户 5/28/2014 9:46:00 PM

18 No underline, Font color: Auto, English (U.S.)

19  
20 **Page 3: [4] Formatted** 作者

21 No underline, Font color: Auto

22  
23 **Page 3: [5] Formatted** Windows 用户 5/28/2014 9:46:00 PM

24 No underline, Font color: Auto, English (U.S.)

25  
26 **Page 3: [6] Formatted** 作者

27 No underline, Font color: Auto

28  
29 **Page 3: [7] Formatted** Windows 用户 5/28/2014 9:46:00 PM

30 No underline, Font color: Auto, English (U.S.)

31  
32 **Page 3: [8] Formatted** 作者

33 No underline, Font color: Auto

34  
35 **Page 3: [9] Formatted** Windows 用户 5/28/2014 9:46:00 PM

36 No underline, Font color: Auto, English (U.S.)

37  
38 **Page 3: [10] Formatted** 作者

39 No underline, Font color: Auto

40  
41 **Page 3: [11] Formatted** Windows 用户 5/28/2014 9:46:00 PM

42 No underline, Font color: Auto, English (U.S.)

43  
44 **Page 3: [12] Formatted** 作者

45 No underline, Font color: Auto

46  
47 **Page 3: [13] Formatted** Windows 用户 5/28/2014 9:46:00 PM

48 No underline, Font color: Auto, English (U.S.)

49  
50 **Page 3: [14] Formatted** 作者 5/28/2014 9:46:00 PM

51 No underline, Font color: Auto, English (U.K.)

52  
53 **Page 3: [15] Formatted** 作者 5/28/2014 9:46:00 PM

54 No underline, Font color: Auto, English (U.K.)

55  
56 **Page 3: [16] Formatted** 作者

57 No underline, Font color: Auto, English (U.K.)

58  
59 **Page 3: [17] Formatted** 作者 5/28/2014 9:46:00 PM

60 No underline, Font color: Auto, English (U.K.)

**Page 3: [18] Formatted** Windows 用户 5/28/2014 9:46:00 PM

No underline, Font color: Auto, English (U.S.)

**Page 3: [19] Formatted** Windows 用户 5/28/2014 9:46:00 PM

No underline, Font color: Auto, English (U.S.)



1  
2  
3  
4  
5  
6  
7  
8  
9  
10  
11 **Page 3: [20] Formatted** Windows 用户 5/28/2014 9:46:00 PM

12 No underline, Font color: Auto, English (U.S.)

13  
14 **Page 3: [21] Formatted** 作者 5/28/2014 9:46:00 PM

15 No underline, Font color: Auto, English (U.K.)

16  
17 **Page 3: [22] Formatted** Windows 用户 5/28/2014 9:46:00 PM

18 No underline, Font color: Auto, English (U.S.)

19  
20 **Page 3: [23] Formatted** 作者

21 No underline, Font color: Auto, English (U.K.)

22  
23 **Page 3: [24] Formatted** Windows 用户 5/28/2014 9:46:00 PM

24 No underline, Font color: Auto, English (U.S.)

25  
26 **Page 3: [25] Formatted** 作者 5/28/2014 9:46:00 PM

27 No underline, Font color: Auto, English (U.K.)

28  
29 **Page 3: [26] Formatted** 作者 5/28/2014 9:46:00 PM

30 No underline, Font color: Auto, English (U.K.)

31  
32 **Page 3: [27] Formatted** 作者 5/28/2014 9:46:00 PM

33 No underline, Font color: Auto, English (U.K.)

34  
35 **Page 3: [28] Formatted** 作者 5/28/2014 9:46:00 PM

36 English (U.K.)

37  
38 **Page 3: [29] Formatted** LENOVO 5/29/2014 2:07:00 PM

39 Don't adjust space between Latin and Asian text, Don't adjust space between Asian text and numbers

40  
41 **Page 3: [30] Formatted** LENOVO 5/29/2014 2:13:00 PM

42 Font: Not Bold, No underline, Font color: Auto

43  
44 **Page 3: [31] Formatted** 作者 5/28/2014 9:46:00 PM

45 No underline, Font color: Auto, English (U.K.)

46  
47 **Page 3: [32] Formatted** LENOVO 5/29/2014 2:07:00 PM

48 Adjust space between Latin and Asian text, Adjust space between Asian text and numbers

49  
50 **Page 3: [33] Formatted** 作者 5/28/2014 9:46:00 PM

51 No underline, Font color: Auto, English (U.K.)

52  
53 **Page 3: [34] Formatted** 作者 5/28/2014 9:46:00 PM

54 No underline, Font color: Auto, English (U.K.)

55  
56 **Page 3: [35] Formatted** 作者 5/28/2014 9:46:00 PM

57 No underline, Font color: Auto, English (U.K.)

58  
59 **Page 3: [36] Formatted** 作者

60 No underline, Font color: Auto, English (U.K.)

**Page 3: [37] Formatted** 作者 5/28/2014 9:46:00 PM

No underline, Font color: Auto, English (U.K.)

**Page 3: [38] Formatted** 作者 5/28/2014 9:46:00 PM

English (U.K.)



1  
2  
3  
4  
5  
6  
7  
8  
9  
10  
11 No underline, Font color: Auto, English (U.K.)

12 **Page 3: [40] Formatted**

作者

13 No underline, Font color: Auto, English (U.K.)

14 **Page 3: [41] Formatted**

作者

15 No underline, Font color: Auto, English (U.K.)

16 **Page 3: [42] Formatted**

作者

5/28/2014 9:46:00 PM

17 No underline, Font color: Auto, English (U.K.)

18 **Page 4: [43] Formatted**

作者

5/28/2014 9:46:00 PM

19 No underline, Font color: Auto, English (U.K.)

20 **Page 4: [44] Formatted**

作者

21 No underline, Font color: Auto, English (U.K.)

22 **Page 4: [45] Formatted**

作者

23 No underline, Font color: Auto, English (U.K.)

24 **Page 4: [46] Formatted**

作者

25 No underline, Font color: Auto, English (U.K.)

26 **Page 7: [47] Formatted**

作者

5/28/2014 9:46:00 PM

27 No underline, Font color: Auto, English (U.K.)

28 **Page 7: [48] Formatted**

作者

5/28/2014 9:46:00 PM

29 No underline, Font color: Auto, English (U.K.)

30 **Page 7: [49] Formatted**

作者

31 No underline, Font color: Auto, English (U.K.)

32 **Page 7: [50] Formatted**

作者

5/28/2014 9:46:00 PM

33 No underline, Font color: Auto, English (U.K.)

34 **Page 8: [51] Formatted**

作者

35 No underline, Font color: Auto, English (U.K.)

36 **Page 8: [52] Formatted**

作者

5/28/2014 9:46:00 PM

37 No underline, Font color: Auto, English (U.K.)

38 **Page 8: [53] Formatted**

作者

5/28/2014 9:46:00 PM

39 No underline, Font color: Auto, English (U.K.)

40 **Page 8: [54] Formatted**

作者

5/28/2014 9:46:00 PM

41 No underline, Font color: Auto, English (U.K.)

42 **Page 8: [55] Formatted**

作者

5/28/2014 9:46:00 PM

43 No underline, Font color: Auto, English (U.K.)

44 **Page 9: [56] Formatted**

作者

5/28/2014 9:46:00 PM

45 No underline, Font color: Auto, English (U.K.)

46 **Page 9: [57] Formatted**

作者

5/28/2014 9:46:00 PM

47 No underline, Font color: Auto, English (U.K.)

48 **Page 9: [58] Formatted**

作者

5/28/2014 9:46:00 PM

1  
2  
3  
4  
5  
6  
7  
8  
9  
10  
11  
12  
13  
14  
15  
16  
17  
18  
19  
20  
21  
22  
23  
24  
25  
26  
27  
28  
29  
30  
31  
32  
33  
34  
35  
36  
37  
38  
39  
40  
41  
42  
43  
44  
45  
46  
47  
48  
49  
50  
51  
52  
53  
54  
55  
56  
57  
58  
59  
60

**Page 9: [59] Formatted** 作者

No underline, Font color: Auto, English (U.K.)

**Page 9: [60] Formatted** 作者 5/28/2014 9:46:00 PM

No underline, Font color: Auto, English (U.K.)

**Page 9: [61] Formatted** 作者 5/28/2014 9:46:00 PM

No underline, Font color: Auto, English (U.K.)

**Page 9: [62] Formatted** 作者 5/28/2014 9:46:00 PM

No underline, Font color: Auto, English (U.K.)

**Page 9: [63] Formatted** 作者 5/28/2014 9:46:00 PM

No underline, Font color: Auto, English (U.K.)

**Page 9: [64] Formatted** 作者

No underline, Font color: Auto, English (U.K.)

**Page 9: [65] Formatted** 作者 5/28/2014 9:46:00 PM

No underline, Font color: Auto, English (U.K.)

**Page 9: [66] Formatted** 作者 5/28/2014 9:46:00 PM

No underline, Font color: Auto, English (U.K.)

**Page 9: [67] Formatted** 作者

No underline, Font color: Auto, English (U.K.)

**Page 9: [68] Formatted** 作者 5/28/2014 9:46:00 PM

No underline, Font color: Auto, English (U.K.)

**Page 9: [69] Formatted** 作者 5/28/2014 9:46:00 PM

No underline, Font color: Auto, English (U.K.)

**Page 9: [70] Formatted** 作者 5/28/2014 9:46:00 PM

No underline, Font color: Auto, English (U.K.)

**Page 9: [71] Formatted** 作者 5/28/2014 9:46:00 PM

No underline, Font color: Auto, English (U.K.)

**Page 9: [72] Formatted** 作者 5/28/2014 9:46:00 PM

No underline, Font color: Auto, English (U.K.)

**Page 9: [73] Formatted** 作者 5/28/2014 9:46:00 PM

No underline, Font color: Auto, English (U.K.)

**Page 9: [74] Formatted** 作者 5/28/2014 9:46:00 PM

No underline, Font color: Auto, English (U.K.)

**Page 9: [75] Formatted** 作者 5/28/2014 9:46:00 PM

No underline, Font color: Auto, English (U.K.)

**Page 9: [76] Formatted** 作者 5/28/2014 9:46:00 PM

No underline, Font color: Auto, English (U.K.) <http://bmjopen.bmj.com/site/about/guidelines.xhtml>

**Page 9: [77] Formatted** 作者 5/28/2014 9:46:00 PM

No underline, Font color: Auto, English (U.K.)

1  
2  
3  
4  
5  
6  
7  
8  
9  
10  
11 **Page 9: [78] Formatted** 作者 5/28/2014 9:46:00 PM

12 No underline, Font color: Auto, English (U.K.)

13  
14 **Page 9: [79] Formatted** 作者 5/28/2014 9:46:00 PM

15 No underline, Font color: Auto, English (U.K.)

16  
17 **Page 9: [80] Formatted** 作者 5/28/2014 9:46:00 PM

18 No underline, Font color: Auto, English (U.K.)

19  
20 **Page 9: [81] Formatted** 作者 5/28/2014 9:46:00 PM

21 No underline, Font color: Auto, English (U.K.)

22  
23 **Page 9: [82] Formatted** 作者 5/28/2014 9:46:00 PM

24 No underline, Font color: Auto, English (U.K.)

25  
26 **Page 9: [83] Formatted** 作者 5/28/2014 9:46:00 PM

27 No underline, Font color: Auto, English (U.K.)

28  
29 **Page 9: [84] Formatted** 作者 5/28/2014 9:46:00 PM

30 No underline, Font color: Auto, English (U.K.)

31  
32 **Page 9: [85] Formatted** 作者 5/28/2014 9:46:00 PM

33 No underline, Font color: Auto, English (U.K.)

34  
35 **Page 9: [86] Formatted** 作者 5/28/2014 9:46:00 PM

36 No underline, Font color: Auto, English (U.K.)

37  
38 **Page 9: [87] Formatted** 作者 5/28/2014 9:46:00 PM

39 No underline, Font color: Auto, English (U.K.)

40  
41 **Page 9: [88] Formatted** 作者 5/28/2014 9:46:00 PM

42 No underline, Font color: Auto, English (U.K.)

43  
44 **Page 10: [89] Formatted** 作者 5/28/2014 9:46:00 PM

45 No underline, Font color: Auto, English (U.K.)

46  
47 **Page 10: [89] Formatted** 作者 5/28/2014 9:46:00 PM

48 No underline, Font color: Auto, English (U.K.)

49  
50 **Page 10: [89] Formatted** 作者 5/28/2014 9:46:00 PM

51 No underline, Font color: Auto, English (U.K.)

52  
53 **Page 10: [89] Formatted** 作者 5/28/2014 9:46:00 PM

54 No underline, Font color: Auto, English (U.K.)

55  
56 **Page 10: [90] Formatted** 作者 5/28/2014 9:46:00 PM

57 No underline, Font color: Auto, English (U.K.)

58  
59 **Page 10: [90] Formatted** 作者 5/28/2014 9:46:00 PM

60 No underline, Font color: Auto, English (U.K.)

**Page 10: [90] Formatted** 作者 5/28/2014 9:46:00 PM

No underline, Font color: Auto, English (U.K.)

**Page 10: [90] Formatted** 作者 5/28/2014 9:46:00 PM

No underline, Font color: Auto, English (U.K.)

1  
2  
3  
4  
5  
6  
7  
8  
9  
10  
11 **Page 10: [90] Formatted** 作者 5/28/2014 9:46:00 PM

12 No underline, Font color: Auto, English (U.K.)

13  
14 **Page 10: [90] Formatted** 作者 5/28/2014 9:46:00 PM

15 No underline, Font color: Auto, English (U.K.)

16  
17 **Page 10: [90] Formatted** 作者 5/28/2014 9:46:00 PM

18 No underline, Font color: Auto, English (U.K.)

19  
20 **Page 10: [90] Formatted** 作者 5/28/2014 9:46:00 PM

21 No underline, Font color: Auto, English (U.K.)

22  
23 **Page 10: [91] Formatted** 作者 5/28/2014 9:46:00 PM

24 No underline, Font color: Auto, English (U.K.)

25  
26 **Page 10: [91] Formatted** 作者 5/28/2014 9:46:00 PM

27 No underline, Font color: Auto, English (U.K.)

28  
29 **Page 10: [91] Formatted** 作者 5/28/2014 9:46:00 PM

30 No underline, Font color: Auto, English (U.K.)

31  
32 **Page 10: [91] Formatted** 作者 5/28/2014 9:46:00 PM

33 No underline, Font color: Auto, English (U.K.)

34  
35 **Page 10: [91] Formatted** 作者 5/28/2014 9:46:00 PM

36 No underline, Font color: Auto, English (U.K.)

37  
38 **Page 10: [91] Formatted** 作者 5/28/2014 9:46:00 PM

39 No underline, Font color: Auto, English (U.K.)

40  
41 **Page 10: [91] Formatted** 作者 5/28/2014 9:46:00 PM

42 No underline, Font color: Auto, English (U.K.)

43  
44 **Page 10: [92] Formatted** 作者 5/28/2014 9:46:00 PM

45 No underline, Font color: Auto, English (U.K.)

46  
47 **Page 10: [92] Formatted** 作者 5/28/2014 9:46:00 PM

48 No underline, Font color: Auto, English (U.K.)

49  
50 **Page 10: [92] Formatted** 作者 5/28/2014 9:46:00 PM

51 No underline, Font color: Auto, English (U.K.)

52  
53 **Page 10: [92] Formatted** 作者 5/28/2014 9:46:00 PM

54 No underline, Font color: Auto, English (U.K.)

55  
56 **Page 10: [92] Formatted** 作者 5/28/2014 9:46:00 PM

57 No underline, Font color: Auto, English (U.K.)

58  
59 **Page 10: [92] Formatted** 作者 5/28/2014 9:46:00 PM

60 No underline, Font color: Auto, English (U.K.)

**Page 10: [92] Formatted** 作者 5/28/2014 9:46:00 PM

No underline, Font color: Auto, English (U.K.)

**Page 10: [92] Formatted** 作者 5/28/2014 9:46:00 PM

No underline, Font color: Auto, English (U.K.)

1  
2  
3  
4  
5  
6  
7  
8  
9  
10  
11 **Page 10: [92] Formatted** 作者 5/28/2014 9:46:00 PM

12 No underline, Font color: Auto, English (U.K.)

13  
14 **Page 10: [92] Formatted** 作者 5/28/2014 9:46:00 PM

15 No underline, Font color: Auto, English (U.K.)

16  
17 **Page 10: [92] Formatted** 作者 5/28/2014 9:46:00 PM

18 No underline, Font color: Auto, English (U.K.)

19  
20 **Page 10: [92] Formatted** 作者 5/28/2014 9:46:00 PM

21 No underline, Font color: Auto, English (U.K.)

22  
23 **Page 10: [92] Formatted** 作者 5/28/2014 9:46:00 PM

24 No underline, Font color: Auto, English (U.K.)

25  
26 **Page 10: [92] Formatted** 作者 5/28/2014 9:46:00 PM

27 No underline, Font color: Auto, English (U.K.)

28  
29 **Page 10: [92] Formatted** 作者 5/28/2014 9:46:00 PM

30 No underline, Font color: Auto, English (U.K.)

31  
32 **Page 10: [92] Formatted** 作者 5/28/2014 9:46:00 PM

33 No underline, Font color: Auto, English (U.K.)

34  
35 **Page 10: [92] Formatted** 作者 5/28/2014 9:46:00 PM

36 No underline, Font color: Auto, English (U.K.)

37  
38 **Page 10: [92] Formatted** 作者 5/28/2014 9:46:00 PM

39 No underline, Font color: Auto, English (U.K.)

40  
41 **Page 10: [92] Formatted** 作者 5/28/2014 9:46:00 PM

42 No underline, Font color: Auto, English (U.K.)

43  
44 **Page 10: [92] Formatted** 作者 5/28/2014 9:46:00 PM

45 No underline, Font color: Auto, English (U.K.)

46  
47 **Page 10: [93] Formatted** 作者 5/28/2014 9:46:00 PM

48 No underline, Font color: Auto, English (U.K.)

49  
50 **Page 10: [93] Formatted** 作者 5/28/2014 9:46:00 PM

51 No underline, Font color: Auto, English (U.K.)

52  
53 **Page 10: [93] Formatted** 作者 5/28/2014 9:46:00 PM

54 No underline, Font color: Auto, English (U.K.)

55  
56 **Page 10: [93] Formatted** 作者 5/28/2014 9:46:00 PM

57 No underline, Font color: Auto, English (U.K.)

58  
59 **Page 10: [93] Formatted** 作者 5/28/2014 9:46:00 PM

60 No underline, Font color: Auto, English (U.K.)

**Page 10: [93] Formatted** 作者 5/28/2014 9:46:00 PM

No underline, Font color: Auto, English (U.K.)

**Page 10: [93] Formatted** 作者 5/28/2014 9:46:00 PM

No underline, Font color: Auto, English (U.K.)

1  
2  
3  
4  
5  
6  
7  
8  
9  
10  
11 **Page 11: [94] Formatted** 作者 5/28/2014 9:46:00 PM

12 No underline, Font color: Auto, English (U.K.)

13  
14 **Page 11: [94] Formatted** 作者 5/28/2014 9:46:00 PM

15 No underline, Font color: Auto, English (U.K.)

16  
17 **Page 11: [94] Formatted** 作者 5/28/2014 9:46:00 PM

18 No underline, Font color: Auto, English (U.K.)

19  
20 **Page 11: [94] Formatted** 作者 5/28/2014 9:46:00 PM

21 No underline, Font color: Auto, English (U.K.)

22  
23 **Page 11: [94] Formatted** 作者 5/28/2014 9:46:00 PM

24 No underline, Font color: Auto, English (U.K.)

25  
26 **Page 11: [94] Formatted** 作者 5/28/2014 9:46:00 PM

27 No underline, Font color: Auto, English (U.K.)

28  
29 **Page 11: [94] Formatted** 作者 5/28/2014 9:46:00 PM

30 No underline, Font color: Auto, English (U.K.)

31  
32 **Page 11: [94] Formatted** 作者 5/28/2014 9:46:00 PM

33 No underline, Font color: Auto, English (U.K.)

34  
35 **Page 11: [94] Formatted** 作者 5/28/2014 9:46:00 PM

36 No underline, Font color: Auto, English (U.K.)

37  
38 **Page 11: [95] Formatted** 作者 5/28/2014 9:46:00 PM

39 No underline, Font color: Auto, English (U.K.)

40  
41 **Page 11: [95] Formatted** 作者 5/28/2014 9:46:00 PM

42 No underline, Font color: Auto, English (U.K.)

43  
44 **Page 11: [96] Formatted** 作者 5/28/2014 9:46:00 PM

45 No underline, Font color: Auto, English (U.K.)

46  
47 **Page 11: [96] Formatted** 作者 5/28/2014 9:46:00 PM

48 No underline, Font color: Auto, English (U.K.)

49  
50 **Page 11: [97] Formatted** 作者 5/28/2014 9:46:00 PM

51 No underline, Font color: Auto, English (U.K.)

52  
53 **Page 11: [97] Formatted** 作者 5/28/2014 9:46:00 PM

54 No underline, Font color: Auto, English (U.K.)

55  
56 **Page 11: [97] Formatted** 作者 5/28/2014 9:46:00 PM

57 No underline, Font color: Auto, English (U.K.)

58  
59 **Page 11: [97] Formatted** 作者 5/28/2014 9:46:00 PM

60 No underline, Font color: Auto, English (U.K.)

**Page 11: [97] Formatted** 作者 5/28/2014 9:46:00 PM

No underline, Font color: Auto, English (U.K.)

**Page 11: [97] Formatted** 作者 5/28/2014 9:46:00 PM

No underline, Font color: Auto, English (U.K.)

1  
2  
3  
4  
5  
6  
7  
8  
9  
10  
11 **Page 11: [97] Formatted** 作者 5/28/2014 9:46:00 PM

12 No underline, Font color: Auto, English (U.K.)

13  
14 **Page 11: [97] Formatted** 作者 5/28/2014 9:46:00 PM

15 No underline, Font color: Auto, English (U.K.)

16  
17 **Page 11: [97] Formatted** 作者 5/28/2014 9:46:00 PM

18 No underline, Font color: Auto, English (U.K.)

19  
20 **Page 11: [97] Formatted** 作者 5/28/2014 9:46:00 PM

21 No underline, Font color: Auto, English (U.K.)

22  
23 **Page 11: [97] Formatted** 作者 5/28/2014 9:46:00 PM

24 No underline, Font color: Auto, English (U.K.)

25  
26 **Page 11: [97] Formatted** 作者 5/28/2014 9:46:00 PM

27 No underline, Font color: Auto, English (U.K.)

28  
29 **Page 11: [97] Formatted** 作者 5/28/2014 9:46:00 PM

30 No underline, Font color: Auto, English (U.K.)

31  
32 **Page 11: [97] Formatted** 作者 5/28/2014 9:46:00 PM

33 No underline, Font color: Auto, English (U.K.)

34  
35 **Page 11: [97] Formatted** 作者 5/28/2014 9:46:00 PM

36 No underline, Font color: Auto, English (U.K.)

37  
38 **Page 11: [97] Formatted** 作者 5/28/2014 9:46:00 PM

39 No underline, Font color: Auto, English (U.K.)

40  
41 **Page 11: [97] Formatted** 作者 5/28/2014 9:46:00 PM

42 No underline, Font color: Auto, English (U.K.)

43  
44 **Page 11: [97] Formatted** 作者 5/28/2014 9:46:00 PM

45 No underline, Font color: Auto, English (U.K.)

46  
47 **Page 11: [97] Formatted** 作者 5/28/2014 9:46:00 PM

48 No underline, Font color: Auto, English (U.K.)

49  
50 **Page 11: [97] Formatted** 作者 5/28/2014 9:46:00 PM

51 No underline, Font color: Auto, English (U.K.)

52  
53 **Page 11: [97] Formatted** 作者 5/28/2014 9:46:00 PM

54 No underline, Font color: Auto, English (U.K.)

55  
56 **Page 11: [97] Formatted** 作者 5/28/2014 9:46:00 PM

57 No underline, Font color: Auto, English (U.K.)

58  
59 **Page 11: [97] Formatted** 作者 5/28/2014 9:46:00 PM

60 No underline, Font color: Auto, English (U.K.)

**Page 11: [97] Formatted** 作者 5/28/2014 9:46:00 PM

No underline, Font color: Auto, English (U.K.)

**Page 11: [98] Formatted** 作者 5/28/2014 9:46:00 PM

No underline, Font color: Auto, English (U.K.)



1  
2  
3  
4  
5  
6  
7  
8  
9  
10  
11 **Page 11: [98] Formatted** 作者 5/28/2014 9:46:00 PM

12 No underline, Font color: Auto, English (U.K.)

13  
14 **Page 11: [98] Formatted** 作者 5/28/2014 9:46:00 PM

15 No underline, Font color: Auto, English (U.K.)

16  
17 **Page 11: [98] Formatted** 作者 5/28/2014 9:46:00 PM

18 No underline, Font color: Auto, English (U.K.)

19  
20 **Page 11: [98] Formatted** 作者 5/28/2014 9:46:00 PM

21 No underline, Font color: Auto, English (U.K.)

22  
23 **Page 11: [98] Formatted** 作者 5/28/2014 9:46:00 PM

24 No underline, Font color: Auto, English (U.K.)

25  
26 **Page 11: [98] Formatted** 作者 5/28/2014 9:46:00 PM

27 No underline, Font color: Auto, English (U.K.)

28  
29 **Page 11: [98] Formatted** 作者 5/28/2014 9:46:00 PM

30 No underline, Font color: Auto, English (U.K.)

31  
32 **Page 11: [98] Formatted** 作者 5/28/2014 9:46:00 PM

33 No underline, Font color: Auto, English (U.K.)

34  
35 **Page 12: [99] Formatted** 作者 5/28/2014 9:46:00 PM

36 No underline, Font color: Auto, English (U.K.)

37  
38 **Page 12: [99] Formatted** 作者 5/28/2014 9:46:00 PM

39 No underline, Font color: Auto, English (U.K.)

40  
41 **Page 12: [99] Formatted** 作者 5/28/2014 9:46:00 PM

42 No underline, Font color: Auto, English (U.K.)

43  
44 **Page 12: [99] Formatted** 作者 5/28/2014 9:46:00 PM

45 No underline, Font color: Auto, English (U.K.)

46  
47 **Page 12: [99] Formatted** 作者 5/28/2014 9:46:00 PM

48 No underline, Font color: Auto, English (U.K.)

49  
50 **Page 12: [99] Formatted** 作者 5/28/2014 9:46:00 PM

51 No underline, Font color: Auto, English (U.K.)

52  
53 **Page 12: [99] Formatted** 作者 5/28/2014 9:46:00 PM

54 No underline, Font color: Auto, English (U.K.)

55  
56 **Page 12: [99] Formatted** 作者 5/28/2014 9:46:00 PM

57 No underline, Font color: Auto, English (U.K.)

58  
59 **Page 12: [99] Formatted** 作者 5/28/2014 9:46:00 PM

60 No underline, Font color: Auto, English (U.K.)

**Page 12: [99] Formatted** 作者 5/28/2014 9:46:00 PM

No underline, Font color: Auto, English (U.K.)

**Page 12: [99] Formatted** 作者 5/28/2014 9:46:00 PM

No underline, Font color: Auto, English (U.K.)



1  
2  
3  
4  
5  
6  
7  
8  
9  
10  
11 **Page 12: [99] Formatted** 作者 5/28/2014 9:46:00 PM

12 No underline, Font color: Auto, English (U.K.)

13  
14 **Page 12: [99] Formatted** 作者 5/28/2014 9:46:00 PM

15 No underline, Font color: Auto, English (U.K.)

16  
17 **Page 12: [99] Formatted** 作者 5/28/2014 9:46:00 PM

18 No underline, Font color: Auto, English (U.K.)

19  
20 **Page 12: [99] Formatted** 作者 5/28/2014 9:46:00 PM

21 No underline, Font color: Auto, English (U.K.)

22  
23 **Page 12: [99] Formatted** 作者 5/28/2014 9:46:00 PM

24 No underline, Font color: Auto, English (U.K.)

25  
26 **Page 12: [99] Formatted** 作者 5/28/2014 9:46:00 PM

27 No underline, Font color: Auto, English (U.K.)

28  
29 **Page 12: [99] Formatted** 作者 5/28/2014 9:46:00 PM

30 No underline, Font color: Auto, English (U.K.)

31  
32 **Page 12: [99] Formatted** 作者 5/28/2014 9:46:00 PM

33 No underline, Font color: Auto, English (U.K.)

34  
35 **Page 12: [99] Formatted** 作者 5/28/2014 9:46:00 PM

36 No underline, Font color: Auto, English (U.K.)

37  
38 **Page 12: [99] Formatted** 作者 5/28/2014 9:46:00 PM

39 No underline, Font color: Auto, English (U.K.)

40  
41 **Page 12: [99] Formatted** 作者 5/28/2014 9:46:00 PM

42 No underline, Font color: Auto, English (U.K.)

43  
44 **Page 12: [99] Formatted** 作者 5/28/2014 9:46:00 PM

45 No underline, Font color: Auto, English (U.K.)

46  
47 **Page 12: [99] Formatted** 作者 5/28/2014 9:46:00 PM

48 No underline, Font color: Auto, English (U.K.)

49  
50 **Page 12: [99] Formatted** 作者 5/28/2014 9:46:00 PM

51 No underline, Font color: Auto, English (U.K.)

52  
53 **Page 12: [99] Formatted** 作者 5/28/2014 9:46:00 PM

54 No underline, Font color: Auto, English (U.K.)

55  
56 **Page 12: [99] Formatted** 作者 5/28/2014 9:46:00 PM

57 No underline, Font color: Auto, English (U.K.)

58  
59 **Page 12: [99] Formatted** 作者 5/28/2014 9:46:00 PM

60 No underline, Font color: Auto, English (U.K.)

**Page 12: [99] Formatted** 作者 5/28/2014 9:46:00 PM

No underline, Font color: Auto, English (U.K.)

**Page 12: [99] Formatted** 作者 5/28/2014 9:46:00 PM

No underline, Font color: Auto, English (U.K.)

1  
2  
3  
4  
5  
6  
7  
8  
9  
10  
11 **Page 12: [99] Formatted** 作者 5/28/2014 9:46:00 PM

12 No underline, Font color: Auto, English (U.K.)

13  
14 **Page 12: [99] Formatted** 作者 5/28/2014 9:46:00 PM

15 No underline, Font color: Auto, English (U.K.)

16  
17 **Page 12: [100] Formatted** 作者 5/28/2014 9:46:00 PM

18 No underline, Font color: Auto, English (U.K.)

19  
20 **Page 12: [100] Formatted** 作者 5/28/2014 9:46:00 PM

21 No underline, Font color: Auto, English (U.K.)

22  
23 **Page 12: [101] Formatted** 作者 5/28/2014 9:46:00 PM

24 No underline, Font color: Auto, English (U.K.)

25  
26 **Page 12: [101] Formatted** 作者 5/28/2014 9:46:00 PM

27 No underline, Font color: Auto, English (U.K.)

28  
29 **Page 12: [101] Formatted** 作者 5/28/2014 9:46:00 PM

30 No underline, Font color: Auto, English (U.K.)

31  
32 **Page 12: [101] Formatted** 作者 5/28/2014 9:46:00 PM

33 No underline, Font color: Auto, English (U.K.)

34  
35 **Page 12: [101] Formatted** 作者 5/28/2014 9:46:00 PM

36 No underline, Font color: Auto, English (U.K.)

37  
38 **Page 12: [101] Formatted** 作者 5/28/2014 9:46:00 PM

39 No underline, Font color: Auto, English (U.K.)

40  
41 **Page 12: [101] Formatted** 作者 5/28/2014 9:46:00 PM

42 No underline, Font color: Auto, English (U.K.)

43  
44 **Page 12: [102] Formatted** 作者 5/28/2014 9:46:00 PM

45 No underline, Font color: Auto, English (U.K.)

46  
47 **Page 12: [102] Formatted** 作者 5/28/2014 9:46:00 PM

48 No underline, Font color: Auto, English (U.K.)

49  
50 **Page 12: [102] Formatted** 作者 5/28/2014 9:46:00 PM

51 No underline, Font color: Auto, English (U.K.)

52  
53 **Page 12: [102] Formatted** 作者 5/28/2014 9:46:00 PM

54 No underline, Font color: Auto, English (U.K.)

55  
56 **Page 12: [102] Formatted** 作者 5/28/2014 9:46:00 PM

57 No underline, Font color: Auto, English (U.K.)

58  
59 **Page 12: [102] Formatted** 作者 5/28/2014 9:46:00 PM

60 No underline, Font color: Auto, English (U.K.)

**Page 12: [102] Formatted** 作者 5/28/2014 9:46:00 PM

No underline, Font color: Auto, English (U.K.)

**Page 12: [102] Formatted** 作者 5/28/2014 9:46:00 PM

No underline, Font color: Auto, English (U.K.)

1  
2  
3  
4  
5  
6  
7  
8  
9  
10  
11 **Page 12: [102] Formatted** 作者 5/28/2014 9:46:00 PM

12 No underline, Font color: Auto, English (U.K.)

13 **Page 12: [102] Formatted** 作者 5/28/2014 9:46:00 PM

14 No underline, Font color: Auto, English (U.K.)

15 **Page 12: [102] Formatted** 作者 5/28/2014 9:46:00 PM

16 No underline, Font color: Auto, English (U.K.)

17 **Page 12: [102] Formatted** 作者 5/28/2014 9:46:00 PM

18 No underline, Font color: Auto, English (U.K.)

19 **Page 12: [102] Formatted** 作者 5/28/2014 9:46:00 PM

20 No underline, Font color: Auto, English (U.K.)

21 **Page 12: [102] Formatted** 作者 5/28/2014 9:46:00 PM

22 No underline, Font color: Auto, English (U.K.)

23 **Page 12: [102] Formatted** 作者 5/28/2014 9:46:00 PM

24 No underline, Font color: Auto, English (U.K.)

25 **Page 12: [102] Formatted** 作者 5/28/2014 9:46:00 PM

26 No underline, Font color: Auto, English (U.K.)

27 **Page 12: [102] Formatted** 作者 5/28/2014 9:46:00 PM

28 No underline, Font color: Auto, English (U.K.)

29 **Page 12: [102] Formatted** 作者 5/28/2014 9:46:00 PM

30 No underline, Font color: Auto, English (U.K.)

31 **Page 12: [102] Formatted** 作者 5/28/2014 9:46:00 PM

32 No underline, Font color: Auto, English (U.K.)

33 **Page 12: [102] Formatted** 作者 5/28/2014 9:46:00 PM

34 No underline, Font color: Auto, English (U.K.)

35 **Page 12: [102] Formatted** 作者 5/28/2014 9:46:00 PM

36 No underline, Font color: Auto, English (U.K.)

37 **Page 12: [102] Formatted** 作者 5/28/2014 9:46:00 PM

38 No underline, Font color: Auto, English (U.K.)

39 **Page 12: [102] Formatted** 作者 5/28/2014 9:46:00 PM

40 No underline, Font color: Auto, English (U.K.)

41 **Page 12: [102] Formatted** 作者 5/28/2014 9:46:00 PM

42 No underline, Font color: Auto, English (U.K.)

43 **Page 12: [102] Formatted** 作者 5/28/2014 9:46:00 PM

44 No underline, Font color: Auto, English (U.K.)

45 **Page 12: [102] Formatted** 作者 5/28/2014 9:46:00 PM

46 No underline, Font color: Auto, English (U.K.)

47 **Page 12: [102] Formatted** 作者 5/28/2014 9:46:00 PM

48 No underline, Font color: Auto, English (U.K.)

49 **Page 13: [103] Formatted** 作者 5/28/2014 9:46:00 PM

50 No underline, Font color: Auto, English (U.K.)

51 **Page 13: [103] Formatted** 作者 5/28/2014 9:46:00 PM

52 No underline, Font color: Auto, English (U.K.)

53 **Page 13: [103] Formatted** 作者 5/28/2014 9:46:00 PM

54 No underline, Font color: Auto, English (U.K.)

55 **Page 13: [103] Formatted** 作者 5/28/2014 9:46:00 PM

56 No underline, Font color: Auto, English (U.K.)

57 **Page 13: [103] Formatted** 作者 5/28/2014 9:46:00 PM

58 No underline, Font color: Auto, English (U.K.)

59 **Page 13: [104] Formatted** 作者 5/28/2014 9:46:00 PM

60 No underline, Font color: Auto, English (U.K.)

1  
2  
3  
4  
5  
6  
7  
8  
9  
10  
11 **Page 13: [105] Formatted** 作者 5/28/2014 9:46:00 PM

12 No underline, Font color: Auto, English (U.K.)

13  
14 **Page 13: [105] Formatted** 作者 5/28/2014 9:46:00 PM

15 No underline, Font color: Auto, English (U.K.)

16  
17 **Page 13: [105] Formatted** 作者 5/28/2014 9:46:00 PM

18 No underline, Font color: Auto, English (U.K.)

19  
20 **Page 13: [105] Formatted** 作者 5/28/2014 9:46:00 PM

21 No underline, Font color: Auto, English (U.K.)

22  
23 **Page 13: [105] Formatted** 作者 5/28/2014 9:46:00 PM

24 No underline, Font color: Auto, English (U.K.)

25  
26 **Page 13: [105] Formatted** 作者 5/28/2014 9:46:00 PM

27 No underline, Font color: Auto, English (U.K.)

28  
29 **Page 13: [105] Formatted** 作者 5/28/2014 9:46:00 PM

30 No underline, Font color: Auto, English (U.K.)

31  
32 **Page 13: [105] Formatted** 作者 5/28/2014 9:46:00 PM

33 No underline, Font color: Auto, English (U.K.)

34  
35 **Page 13: [105] Formatted** 作者 5/28/2014 9:46:00 PM

36 No underline, Font color: Auto, English (U.K.)

37  
38 **Page 13: [105] Formatted** 作者 5/28/2014 9:46:00 PM

39 No underline, Font color: Auto, English (U.K.)

40  
41 **Page 13: [105] Formatted** 作者 5/28/2014 9:46:00 PM

42 No underline, Font color: Auto, English (U.K.)

43  
44 **Page 13: [105] Formatted** 作者 5/28/2014 9:46:00 PM

45 No underline, Font color: Auto, English (U.K.)

46  
47 **Page 13: [105] Formatted** 作者 5/28/2014 9:46:00 PM

48 No underline, Font color: Auto, English (U.K.)

49  
50 **Page 13: [105] Formatted** 作者 5/28/2014 9:46:00 PM

51 No underline, Font color: Auto, English (U.K.)

52  
53 **Page 13: [105] Formatted** 作者 5/28/2014 9:46:00 PM

54 No underline, Font color: Auto, English (U.K.)

55  
56 **Page 13: [105] Formatted** 作者 5/28/2014 9:46:00 PM

57 No underline, Font color: Auto, English (U.K.)

58  
59 **Page 13: [105] Formatted** 作者 5/28/2014 9:46:00 PM

60 No underline, Font color: Auto, English (U.K.)

**Page 13: [105] Formatted** 作者 5/28/2014 9:46:00 PM

No underline, Font color: Auto, English (U.K.)

**Page 13: [105] Formatted** 作者 5/28/2014 9:46:00 PM

No underline, Font color: Auto, English (U.K.)

1  
2  
3  
4  
5  
6  
7  
8  
9  
10  
11 **Page 13: [105] Formatted** 作者 5/28/2014 9:46:00 PM

12 No underline, Font color: Auto, English (U.K.)

13 **Page 13: [105] Formatted** 作者 5/28/2014 9:46:00 PM

14 No underline, Font color: Auto, English (U.K.)

15 **Page 13: [105] Formatted** 作者 5/28/2014 9:46:00 PM

16 No underline, Font color: Auto, English (U.K.)

17 **Page 13: [105] Formatted** 作者 5/28/2014 9:46:00 PM

18 No underline, Font color: Auto, English (U.K.)

19 **Page 13: [105] Formatted** 作者 5/28/2014 9:46:00 PM

20 No underline, Font color: Auto, English (U.K.)

21 **Page 13: [105] Formatted** 作者 5/28/2014 9:46:00 PM

22 No underline, Font color: Auto, English (U.K.)

23 **Page 13: [105] Formatted** 作者 5/28/2014 9:46:00 PM

24 No underline, Font color: Auto, English (U.K.)

25 **Page 13: [105] Formatted** 作者 5/28/2014 9:46:00 PM

26 No underline, Font color: Auto, English (U.K.)

27 **Page 13: [105] Formatted** 作者 5/28/2014 9:46:00 PM

28 No underline, Font color: Auto, English (U.K.)

29 **Page 13: [105] Formatted** 作者 5/28/2014 9:46:00 PM

30 No underline, Font color: Auto, English (U.K.)

31 **Page 13: [105] Formatted** 作者 5/28/2014 9:46:00 PM

32 No underline, Font color: Auto, English (U.K.)

33 **Page 13: [105] Formatted** 作者 5/28/2014 9:46:00 PM

34 No underline, Font color: Auto, English (U.K.)

35 **Page 13: [105] Formatted** 作者 5/28/2014 9:46:00 PM

36 No underline, Font color: Auto, English (U.K.)

37 **Page 13: [105] Formatted** 作者 5/28/2014 9:46:00 PM

38 No underline, Font color: Auto, English (U.K.)

39 **Page 13: [105] Formatted** 作者 5/28/2014 9:46:00 PM

40 No underline, Font color: Auto, English (U.K.)

41 **Page 13: [105] Formatted** 作者 5/28/2014 9:46:00 PM

42 No underline, Font color: Auto, English (U.K.)

43 **Page 13: [105] Formatted** 作者 5/28/2014 9:46:00 PM

44 No underline, Font color: Auto, English (U.K.)

45 **Page 13: [105] Formatted** 作者 5/28/2014 9:46:00 PM

46 No underline, Font color: Auto, English (U.K.)

47 **Page 13: [105] Formatted** 作者 5/28/2014 9:46:00 PM

48 No underline, Font color: Auto, English (U.K.)

49  
50  
51  
52  
53  
54  
55  
56  
57  
58  
59  
60

1  
2  
3  
4  
5  
6  
7  
8  
9  
10  
11 **Page 13: [105] Formatted** 作者 5/28/2014 9:46:00 PM

12 No underline, Font color: Auto, English (U.K.)

13 **Page 13: [105] Formatted** 作者 5/28/2014 9:46:00 PM

14 No underline, Font color: Auto, English (U.K.)

15 **Page 13: [105] Formatted** 作者 5/28/2014 9:46:00 PM

16 No underline, Font color: Auto, English (U.K.)

17 **Page 13: [105] Formatted** 作者 5/28/2014 9:46:00 PM

18 No underline, Font color: Auto, English (U.K.)

19 **Page 13: [105] Formatted** 作者 5/28/2014 9:46:00 PM

20 No underline, Font color: Auto, English (U.K.)

21 **Page 13: [105] Formatted** 作者 5/28/2014 9:46:00 PM

22 No underline, Font color: Auto, English (U.K.)

23 **Page 13: [105] Formatted** 作者 5/28/2014 9:46:00 PM

24 No underline, Font color: Auto, English (U.K.)

25 **Page 13: [105] Formatted** 作者 5/28/2014 9:46:00 PM

26 No underline, Font color: Auto, English (U.K.)

27 **Page 13: [105] Formatted** 作者 5/28/2014 9:46:00 PM

28 No underline, Font color: Auto, English (U.K.)

29 **Page 13: [105] Formatted** 作者 5/28/2014 9:46:00 PM

30 No underline, Font color: Auto, English (U.K.)

31 **Page 13: [105] Formatted** 作者 5/28/2014 9:46:00 PM

32 No underline, Font color: Auto, English (U.K.)

33 **Page 13: [105] Formatted** 作者 5/28/2014 9:46:00 PM

34 No underline, Font color: Auto, English (U.K.)

35 **Page 13: [105] Formatted** 作者 5/28/2014 9:46:00 PM

36 No underline, Font color: Auto, English (U.K.)

37 **Page 13: [105] Formatted** 作者 5/28/2014 9:46:00 PM

38 No underline, Font color: Auto, English (U.K.)

39 **Page 13: [105] Formatted** 作者 5/28/2014 9:46:00 PM

40 No underline, Font color: Auto, English (U.K.)

41 **Page 13: [105] Formatted** 作者 5/28/2014 9:46:00 PM

42 No underline, Font color: Auto, English (U.K.)

43 **Page 13: [105] Formatted** 作者 5/28/2014 9:46:00 PM

44 No underline, Font color: Auto, English (U.K.)

45 **Page 14: [106] Formatted** 作者 5/28/2014 9:46:00 PM

46 No underline, Font color: Auto, English (U.K.)

47 **Page 14: [106] Formatted** 作者 5/28/2014 9:46:00 PM

48 No underline, Font color: Auto, English (U.K.)

49 **Page 14: [106] Formatted** 作者 5/28/2014 9:46:00 PM

50 No underline, Font color: Auto, English (U.K.)

51 **Page 14: [106] Formatted** 作者 5/28/2014 9:46:00 PM

52 No underline, Font color: Auto, English (U.K.)

53 **Page 14: [106] Formatted** 作者 5/28/2014 9:46:00 PM

54 No underline, Font color: Auto, English (U.K.)

55 **Page 14: [106] Formatted** 作者 5/28/2014 9:46:00 PM

56 No underline, Font color: Auto, English (U.K.)

57 **Page 14: [106] Formatted** 作者 5/28/2014 9:46:00 PM

58 No underline, Font color: Auto, English (U.K.)

59 **Page 14: [106] Formatted** 作者 5/28/2014 9:46:00 PM

60 No underline, Font color: Auto, English (U.K.)

1  
2  
3  
4  
5  
6  
7  
8  
9  
10  
11 **Page 14: [106] Formatted** 作者 5/28/2014 9:46:00 PM

12 No underline, Font color: Auto, English (U.K.)

13 **Page 14: [106] Formatted** 作者 5/28/2014 9:46:00 PM

14 No underline, Font color: Auto, English (U.K.)

15 **Page 14: [107] Formatted** 作者 5/28/2014 9:46:00 PM

16 No underline, Font color: Auto, English (U.K.)

17 **Page 14: [107] Formatted** 作者 5/28/2014 9:46:00 PM

18 No underline, Font color: Auto, English (U.K.)

19 **Page 14: [107] Formatted** 作者 5/28/2014 9:46:00 PM

20 No underline, Font color: Auto, English (U.K.)

21 **Page 14: [107] Formatted** 作者 5/28/2014 9:46:00 PM

22 No underline, Font color: Auto, English (U.K.)

23 **Page 14: [107] Formatted** 作者 5/28/2014 9:46:00 PM

24 No underline, Font color: Auto, English (U.K.)

25 **Page 14: [107] Formatted** 作者 5/28/2014 9:46:00 PM

26 No underline, Font color: Auto, English (U.K.)

27 **Page 14: [107] Formatted** 作者 5/28/2014 9:46:00 PM

28 No underline, Font color: Auto, English (U.K.)

29 **Page 14: [107] Formatted** 作者 5/28/2014 9:46:00 PM

30 No underline, Font color: Auto, English (U.K.)

31 **Page 14: [107] Formatted** 作者 5/28/2014 9:46:00 PM

32 No underline, Font color: Auto, English (U.K.)

33 **Page 14: [107] Formatted** 作者 5/28/2014 9:46:00 PM

34 No underline, Font color: Auto, English (U.K.)

35 **Page 14: [107] Formatted** 作者 5/28/2014 9:46:00 PM

36 No underline, Font color: Auto, English (U.K.)

37 **Page 14: [107] Formatted** 作者 5/28/2014 9:46:00 PM

38 No underline, Font color: Auto, English (U.K.)

39 **Page 14: [107] Formatted** 作者 5/28/2014 9:46:00 PM

40 No underline, Font color: Auto, English (U.K.)

41 **Page 14: [107] Formatted** 作者 5/28/2014 9:46:00 PM

42 No underline, Font color: Auto, English (U.K.)

43 **Page 14: [107] Formatted** 作者 5/28/2014 9:46:00 PM

44 No underline, Font color: Auto, English (U.K.)

45 **Page 14: [107] Formatted** 作者 5/28/2014 9:46:00 PM

46 No underline, Font color: Auto, English (U.K.)

47 **Page 14: [107] Formatted** 作者 5/28/2014 9:46:00 PM

48 No underline, Font color: Auto, English (U.K.)

49 **Page 14: [107] Formatted** 作者 5/28/2014 9:46:00 PM

50 No underline, Font color: Auto, English (U.K.)



1  
2  
3  
4  
5  
6  
7  
8  
9  
10  
11 **Page 14: [107] Formatted** 作者 5/28/2014 9:46:00 PM

12 No underline, Font color: Auto, English (U.K.)

13  
14 **Page 14: [107] Formatted** 作者 5/28/2014 9:46:00 PM

15 No underline, Font color: Auto, English (U.K.)

16  
17 **Page 14: [107] Formatted** 作者 5/28/2014 9:46:00 PM

18 No underline, Font color: Auto, English (U.K.)

19  
20 **Page 14: [107] Formatted** 作者 5/28/2014 9:46:00 PM

21 No underline, Font color: Auto, English (U.K.)

22  
23 **Page 14: [107] Formatted** 作者 5/28/2014 9:46:00 PM

24 No underline, Font color: Auto, English (U.K.)

25  
26 **Page 14: [107] Formatted** 作者 5/28/2014 9:46:00 PM

27 No underline, Font color: Auto, English (U.K.)

28  
29 **Page 14: [107] Formatted** 作者 5/28/2014 9:46:00 PM

30 No underline, Font color: Auto, English (U.K.)

31  
32 **Page 14: [107] Formatted** 作者 5/28/2014 9:46:00 PM

33 No underline, Font color: Auto, English (U.K.)

34  
35 **Page 14: [107] Formatted** 作者 5/28/2014 9:46:00 PM

36 No underline, Font color: Auto, English (U.K.)

37  
38 **Page 14: [107] Formatted** 作者 5/28/2014 9:46:00 PM

39 No underline, Font color: Auto, English (U.K.)

40  
41 **Page 14: [107] Formatted** 作者 5/28/2014 9:46:00 PM

42 No underline, Font color: Auto, English (U.K.)

43  
44 **Page 14: [107] Formatted** 作者 5/28/2014 9:46:00 PM

45 No underline, Font color: Auto, English (U.K.)

46  
47 **Page 14: [107] Formatted** 作者 5/28/2014 9:46:00 PM

48 No underline, Font color: Auto, English (U.K.)

49  
50 **Page 14: [107] Formatted** 作者 5/28/2014 9:46:00 PM

51 No underline, Font color: Auto, English (U.K.)

52  
53 **Page 14: [108] Formatted** 作者 5/28/2014 9:46:00 PM

54 No underline, Font color: Auto, English (U.K.)

55  
56 **Page 14: [108] Formatted** 作者 5/28/2014 9:46:00 PM

57 No underline, Font color: Auto, English (U.K.)

58  
59 **Page 14: [108] Formatted** 作者 5/28/2014 9:46:00 PM

60 No underline, Font color: Auto, English (U.K.)

**Page 14: [108] Formatted** 作者 5/28/2014 9:46:00 PM

No underline, Font color: Auto, English (U.K.)

**Page 14: [108] Formatted** 作者 5/28/2014 9:46:00 PM

No underline, Font color: Auto, English (U.K.)



1  
2  
3  
4  
5  
6  
7  
8  
9  
10  
11 **Page 14: [109] Formatted** 作者 5/28/2014 9:46:00 PM

12 No underline, Font color: Auto, English (U.K.)

13 **Page 14: [109] Formatted** 作者 5/28/2014 9:46:00 PM

14 No underline, Font color: Auto, English (U.K.)

15 **Page 14: [109] Formatted** 作者 5/28/2014 9:46:00 PM

16 No underline, Font color: Auto, English (U.K.)

17 **Page 14: [109] Formatted** 作者 5/28/2014 9:46:00 PM

18 No underline, Font color: Auto, English (U.K.)

19 **Page 14: [109] Formatted** 作者 5/28/2014 9:46:00 PM

20 No underline, Font color: Auto, English (U.K.)

21 **Page 14: [109] Formatted** 作者 5/28/2014 9:46:00 PM

22 No underline, Font color: Auto, English (U.K.)

23 **Page 15: [110] Formatted** 作者 5/28/2014 9:46:00 PM

24 No underline, Font color: Auto, English (U.K.)

25 **Page 15: [111] Formatted** 作者

26 No underline, Font color: Auto, English (U.K.)

27 **Page 15: [112] Formatted** 作者 5/28/2014 9:46:00 PM

28 No underline, Font color: Auto, English (U.K.)

29 **Page 15: [113] Formatted** 作者 5/28/2014 9:46:00 PM

30 No underline, Font color: Auto, English (U.K.)

31 **Page 15: [114] Formatted** 作者 5/28/2014 9:46:00 PM

32 No underline, Font color: Auto, English (U.K.)

33 **Page 15: [115] Formatted** 作者 5/28/2014 9:46:00 PM

34 No underline, Font color: Auto, English (U.K.)

35 **Page 15: [116] Formatted** 作者 5/28/2014 9:46:00 PM

36 No underline, Font color: Auto, English (U.K.)

37 **Page 15: [117] Formatted** 作者 5/28/2014 9:46:00 PM

38 No underline, Font color: Auto, English (U.K.)

39 **Page 15: [118] Formatted** 作者 5/28/2014 9:46:00 PM

40 No underline, Font color: Auto, English (U.K.)

41 **Page 15: [119] Formatted** 作者 5/28/2014 9:46:00 PM

42 No underline, Font color: Auto, English (U.K.)

43 **Page 15: [120] Formatted** 作者

44 No underline, Font color: Auto, English (U.K.)

45 **Page 15: [121] Formatted** 作者 5/28/2014 9:46:00 PM

46 No underline, Font color: Auto, English (U.K.)

47 **Page 15: [122] Formatted** 作者

48 No underline, Font color: Auto, English (U.K.)

1  
2  
3  
4  
5  
6  
7  
8  
9  
10  
11 **Page 15: [123] Formatted** 作者 5/28/2014 9:46:00 PM

12 No underline, Font color: Auto, English (U.K.)

13  
14 **Page 15: [124] Formatted** 作者 5/28/2014 9:46:00 PM

15 No underline, Font color: Auto, English (U.K.)

16  
17 **Page 15: [125] Formatted** 作者 5/28/2014 9:46:00 PM

18 No underline, Font color: Auto, English (U.K.)

19  
20 **Page 15: [126] Formatted** 作者 5/28/2014 9:46:00 PM

21 No underline, Font color: Auto, English (U.K.)

22  
23 **Page 15: [127] Formatted** 作者 5/28/2014 9:46:00 PM

24 No underline, Font color: Auto, English (U.K.)

25  
26 **Page 15: [128] Formatted** 作者 5/28/2014 9:46:00 PM

27 No underline, Font color: Auto, English (U.K.)

28  
29 **Page 15: [129] Formatted** 作者 5/28/2014 9:46:00 PM

30 No underline, Font color: Auto, English (U.K.)

31  
32 **Page 15: [130] Formatted** 作者 5/28/2014 9:46:00 PM

33 No underline, Font color: Auto, English (U.K.)

34  
35 **Page 15: [131] Formatted** 作者

36 No underline, Font color: Auto, English (U.K.)

37  
38 **Page 15: [132] Formatted** 作者 5/28/2014 9:46:00 PM

39 No underline, Font color: Auto, English (U.K.)

40  
41 **Page 15: [133] Formatted** 作者

42 No underline, Font color: Auto, English (U.K.)

43  
44 **Page 15: [134] Formatted** 作者 5/28/2014 9:46:00 PM

45 No underline, Font color: Auto, English (U.K.)

46  
47 **Page 15: [135] Formatted** 作者 5/28/2014 9:46:00 PM

48 No underline, Font color: Auto, English (U.K.)

49  
50 **Page 15: [136] Formatted** 作者 5/28/2014 9:46:00 PM

51 No underline, Font color: Auto, English (U.K.)

52  
53 **Page 15: [137] Formatted** 作者 5/28/2014 9:46:00 PM

54 No underline, Font color: Auto, English (U.K.)

55  
56 **Page 15: [138] Formatted** 作者

57 No underline, Font color: Auto, English (U.K.)

58  
59 **Page 15: [139] Formatted** 作者 5/28/2014 9:46:00 PM

60 No underline, Font color: Auto, English (U.K.)

**Page 15: [140] Formatted** 作者 5/28/2014 9:46:00 PM

No underline, Font color: Auto, English (U.K.)

**Page 15: [141] Formatted** 作者 5/28/2014 9:46:00 PM

No underline, Font color: Auto, English (U.K.)

1  
2  
3  
4  
5  
6  
7  
8  
9  
10  
11 **Page 15: [142] Formatted** 作者 5/28/2014 9:46:00 PM

12 No underline, Font color: Auto, English (U.K.)

13  
14 **Page 15: [143] Formatted** 作者 5/28/2014 9:46:00 PM

15 No underline, Font color: Auto, English (U.K.)

16  
17 **Page 15: [144] Formatted** 作者 5/28/2014 9:46:00 PM

18 No underline, Font color: Auto, English (U.K.)

19  
20 **Page 15: [145] Formatted** 作者 5/28/2014 9:46:00 PM

21 No underline, Font color: Auto, English (U.K.)

22  
23 **Page 15: [146] Formatted** 作者 5/28/2014 9:46:00 PM

24 No underline, Font color: Auto, English (U.K.)

25  
26 **Page 15: [147] Formatted** 作者 5/28/2014 9:46:00 PM

27 No underline, Font color: Auto, English (U.K.)

28  
29 **Page 15: [148] Formatted** 作者 5/28/2014 9:46:00 PM

30 No underline, Font color: Auto, English (U.K.)

31  
32 **Page 15: [149] Formatted** 作者

33 No underline, Font color: Auto, English (U.K.)

34  
35 **Page 15: [150] Formatted** 作者 5/28/2014 9:46:00 PM

36 No underline, Font color: Auto, English (U.K.)

37  
38 **Page 15: [151] Formatted** 作者

39 No underline, Font color: Auto, English (U.K.)

40  
41 **Page 16: [152] Formatted** 作者

42 No underline, Font color: Auto, English (U.K.)

43  
44 **Page 16: [152] Formatted** 作者

45 No underline, Font color: Auto, English (U.K.)

46  
47 **Page 16: [152] Formatted** 作者

48 No underline, Font color: Auto, English (U.K.)

49  
50 **Page 16: [152] Formatted** 作者

51 No underline, Font color: Auto, English (U.K.)

52  
53 **Page 16: [152] Formatted** 作者

54 No underline, Font color: Auto, English (U.K.)

55  
56 **Page 16: [152] Formatted** 作者

57 No underline, Font color: Auto, English (U.K.)

58  
59 **Page 16: [152] Formatted** 作者

60 No underline, Font color: Auto, English (U.K.)

**Page 16: [152] Formatted** 作者

No underline, Font color: Auto, English (U.K.)

**Page 16: [152] Formatted** 作者

No underline, Font color: Auto, English (U.K.)

1  
2  
3  
4  
5  
6  
7  
8  
9  
10  
11  
12  
13  
14  
15  
16  
17  
18  
19  
20  
21  
22  
23  
24  
25  
26  
27  
28  
29  
30  
31  
32  
33  
34  
35  
36  
37  
38  
39  
40  
41  
42  
43  
44  
45  
46  
47  
48  
49  
50  
51  
52  
53  
54  
55  
56  
57  
58  
59  
60

**Page 16: [152] Formatted** 作者

No underline, Font color: Auto, English (U.K.)

**Page 16: [152] Formatted** 作者

No underline, Font color: Auto, English (U.K.)

**Page 16: [152] Formatted** 作者

No underline, Font color: Auto, English (U.K.)

**Page 16: [152] Formatted** 作者

No underline, Font color: Auto, English (U.K.)

**Page 16: [152] Formatted** 作者

No underline, Font color: Auto, English (U.K.)

**Page 16: [152] Formatted** 作者

No underline, Font color: Auto, English (U.K.)

**Page 16: [152] Formatted** 作者

No underline, Font color: Auto, English (U.K.)

**Page 16: [152] Formatted** 作者

No underline, Font color: Auto, English (U.K.)

**Page 16: [152] Formatted** 作者

No underline, Font color: Auto, English (U.K.)

**Page 16: [152] Formatted** 作者

No underline, Font color: Auto, English (U.K.)

**Page 16: [152] Formatted** 作者

No underline, Font color: Auto, English (U.K.)

**Page 16: [152] Formatted** 作者

No underline, Font color: Auto, English (U.K.)

**Page 16: [152] Formatted** 作者

No underline, Font color: Auto, English (U.K.)

**Page 16: [152] Formatted** 作者

No underline, Font color: Auto, English (U.K.)

**Page 16: [152] Formatted** 作者

No underline, Font color: Auto, English (U.K.)

**Page 16: [152] Formatted** 作者

No underline, Font color: Auto, English (U.K.)

**Page 16: [152] Formatted** 作者

No underline, Font color: Auto, English (U.K.)

**Page 16: [153] Formatted** 作者 5/28/2014 9:46:00 PM

No underline, Font color: Auto, English (U.K.)

For peer review only - <http://bmjopen.bmj.com/site/about/guidelines.xhtml>

**Page 16: [153] Formatted** 作者 5/28/2014 9:46:00 PM

No underline, Font color: Auto, English (U.K.)

1  
2  
3  
4  
5  
6  
7  
8  
9  
10  
11 **Page 16: [154] Formatted** 作者 5/28/2014 9:46:00 PM

12 No underline, Font color: Auto, English (U.K.)

13 **Page 16: [154] Formatted** 作者 5/28/2014 9:46:00 PM

14 No underline, Font color: Auto, English (U.K.)

15 **Page 16: [154] Formatted** 作者 5/28/2014 9:46:00 PM

16 No underline, Font color: Auto, English (U.K.)

17 **Page 16: [155] Formatted** 作者 5/28/2014 9:46:00 PM

18 No underline, Font color: Auto, English (U.K.)

19 **Page 16: [155] Formatted** 作者 5/28/2014 9:46:00 PM

20 No underline, Font color: Auto, English (U.K.)

21 **Page 16: [156] Formatted** 作者 5/28/2014 9:46:00 PM

22 No underline, Font color: Auto, English (U.K.)

23 **Page 16: [156] Formatted** 作者 5/28/2014 9:46:00 PM

24 No underline, Font color: Auto, English (U.K.)

25 **Page 16: [156] Formatted** 作者 5/28/2014 9:46:00 PM

26 No underline, Font color: Auto, English (U.K.)

27 **Page 16: [156] Formatted** 作者 5/28/2014 9:46:00 PM

28 No underline, Font color: Auto, English (U.K.)

29 **Page 16: [156] Formatted** 作者 5/28/2014 9:46:00 PM

30 No underline, Font color: Auto, English (U.K.)

31 **Page 16: [156] Formatted** 作者 5/28/2014 9:46:00 PM

32 No underline, Font color: Auto, English (U.K.)

33 **Page 16: [156] Formatted** 作者 5/28/2014 9:46:00 PM

34 No underline, Font color: Auto, English (U.K.)

35 **Page 16: [157] Formatted** Windows 用户 5/28/2014 9:46:00 PM

36 No underline, Font color: Auto, English (U.S.)

37 **Page 16: [157] Formatted** Windows 用户 5/28/2014 9:46:00 PM

38 No underline, Font color: Auto, English (U.S.)

39 **Page 16: [157] Formatted** Windows 用户 5/28/2014 9:46:00 PM

40 No underline, Font color: Auto, English (U.S.)

41 **Page 16: [158] Formatted** 作者 5/28/2014 9:46:00 PM

42 No underline, Font color: Auto, English (U.K.)

43 **Page 16: [158] Formatted** 作者 5/28/2014 9:46:00 PM

44 No underline, Font color: Auto, English (U.K.)

45 **Page 17: [159] Formatted** Windows 用户 5/28/2014 9:46:00 PM

46 No underline, Font color: Auto, English (U.S.)

47 **Page 17: [160] Formatted** Windows 用户 5/28/2014 9:46:00 PM

48 No underline, Font color: Auto, English (U.S.)

1  
2  
3  
4  
5  
6  
7  
8  
9  
10  
11 **Page 17: [161] Formatted** 作者

12 No underline, Font color: Auto, English (U.K.)

13  
14 **Page 17: [162] Formatted** Windows 用户 5/28/2014 9:46:00 PM

15 No underline, Font color: Auto, English (U.S.)

16  
17 **Page 17: [163] Formatted** 作者 5/28/2014 9:46:00 PM

18 No underline, Font color: Auto, English (U.K.)

19  
20 **Page 17: [164] Formatted** Windows 用户 5/28/2014 9:46:00 PM

21 No underline, Font color: Auto, English (U.S.)

22  
23 **Page 17: [165] Formatted** 作者 5/28/2014 9:46:00 PM

24 Font: (Default) Times New Roman, Not Bold, English (U.K.)

25  
26 **Page 17: [166] Formatted** 作者 5/28/2014 9:46:00 PM

27 No underline, Font color: Auto, English (U.K.)

28  
29 **Page 22: [167] Formatted** 作者 5/28/2014 9:46:00 PM

30 English (U.K.)

31  
32 **Page 22: [168] Formatted** 作者 5/28/2014 9:46:00 PM

33 No underline, Font color: Auto, English (U.K.)

34  
35 **Page 22: [169] Formatted Table** Windows 用户 5/20/2014 9:08:00 AM

36 Formatted Table

37  
38 **Page 22: [170] Formatted** 作者 5/28/2014 9:46:00 PM

39 English (U.K.)

40  
41 **Page 22: [171] Formatted** 作者 5/28/2014 9:46:00 PM

42 No underline, Font color: Auto, English (U.K.)

43  
44 **Page 22: [171] Formatted** 作者 5/28/2014 9:46:00 PM

45 No underline, Font color: Auto, English (U.K.)

46  
47 **Page 22: [172] Formatted** 作者 5/28/2014 9:46:00 PM

48 No underline, Font color: Auto, English (U.K.)

49  
50 **Page 22: [172] Formatted** 作者 5/28/2014 9:46:00 PM

51 No underline, Font color: Auto, English (U.K.)

52  
53 **Page 22: [173] Formatted** 作者 5/28/2014 9:46:00 PM

54 No underline, Font color: Auto, English (U.K.)

55  
56 **Page 22: [173] Formatted** 作者 5/28/2014 9:46:00 PM

57 No underline, Font color: Auto, English (U.K.)

58  
59 **Page 22: [174] Formatted** 作者 5/28/2014 9:46:00 PM

60 No underline, Font color: Auto, English (U.K.)

**Page 22: [174] Formatted** 作者 5/28/2014 9:46:00 PM

No underline, Font color: Auto, English (U.K.)

**Page 22: [175] Formatted** 作者 5/28/2014 9:46:00 PM

No underline, Font color: Auto, English (U.K.)

1  
2  
3  
4  
5  
6  
7  
8  
9  
10  
11 **Page 22: [175] Formatted** 作者 5/28/2014 9:46:00 PM

12 No underline, Font color: Auto, English (U.K.)

13  
14 **Page 22: [176] Formatted** 作者 5/28/2014 9:46:00 PM

15 No underline, Font color: Auto, English (U.K.)

16  
17 **Page 22: [176] Formatted** 作者 5/28/2014 9:46:00 PM

18 No underline, Font color: Auto, English (U.K.)

19  
20 **Page 22: [177] Formatted** 作者 5/28/2014 9:46:00 PM

21 No underline, Font color: Auto, English (U.K.)

22  
23 **Page 22: [177] Formatted** 作者 5/28/2014 9:46:00 PM

24 No underline, Font color: Auto, English (U.K.)

25  
26 **Page 22: [178] Formatted** 作者 5/28/2014 9:46:00 PM

27 No underline, Font color: Auto, English (U.K.)

28  
29 **Page 22: [178] Formatted** 作者 5/28/2014 9:46:00 PM

30 No underline, Font color: Auto, English (U.K.)

31  
32 **Page 22: [179] Formatted** 作者 5/28/2014 9:46:00 PM

33 No underline, Font color: Auto, English (U.K.)

34  
35 **Page 22: [179] Formatted** 作者 5/28/2014 9:46:00 PM

36 No underline, Font color: Auto, English (U.K.)

37  
38 **Page 22: [180] Formatted** 作者 5/28/2014 9:46:00 PM

39 No underline, Font color: Auto, English (U.K.)

40  
41 **Page 22: [180] Formatted** 作者 5/28/2014 9:46:00 PM

42 No underline, Font color: Auto, English (U.K.)

43  
44 **Page 22: [181] Formatted** 作者 5/28/2014 9:46:00 PM

45 No underline, Font color: Auto, English (U.K.)

46  
47 **Page 22: [181] Formatted** 作者 5/28/2014 9:46:00 PM

48 No underline, Font color: Auto, English (U.K.)

49  
50 **Page 22: [182] Formatted** 作者 5/28/2014 9:46:00 PM

51 No underline, Font color: Auto, English (U.K.)

52  
53 **Page 22: [182] Formatted** 作者 5/28/2014 9:46:00 PM

54 No underline, Font color: Auto, English (U.K.)

55  
56 **Page 22: [183] Formatted** 作者 5/28/2014 9:46:00 PM

57 No underline, Font color: Auto, English (U.K.)

58  
59 **Page 22: [183] Formatted** 作者 5/28/2014 9:46:00 PM

60 No underline, Font color: Auto, English (U.K.)

**Page 22: [184] Formatted** 作者 5/28/2014 9:46:00 PM

No underline, Font color: Auto, English (U.K.)

**Page 22: [184] Formatted** 作者 5/28/2014 9:46:00 PM

No underline, Font color: Auto, English (U.K.)



1  
2  
3  
4  
5  
6  
7  
8  
9  
10  
11  
12  
13  
14  
15  
16  
17  
18  
19  
20  
21  
22  
23  
24  
25  
26  
27  
28  
29  
30  
31  
32  
33  
34  
35  
36  
37  
38  
39  
40  
41  
42  
43  
44  
45  
46  
47  
48  
49  
50  
51  
52  
53  
54  
55  
56  
57  
58  
59  
60

**Page 22: [185] Formatted** 作者 5/28/2014 9:46:00 PM

No underline, Font color: Auto, English (U.K.)

**Page 22: [185] Formatted** 作者 5/28/2014 9:46:00 PM

No underline, Font color: Auto, English (U.K.)

**Page 22: [186] Formatted** 作者 5/28/2014 9:46:00 PM

No underline, Font color: Auto, English (U.K.)

**Page 22: [186] Formatted** 作者 5/28/2014 9:46:00 PM

No underline, Font color: Auto, English (U.K.)

**Page 22: [187] Formatted** 作者 5/28/2014 9:46:00 PM

No underline, Font color: Auto, English (U.K.)

**Page 22: [187] Formatted** 作者 5/28/2014 9:46:00 PM

No underline, Font color: Auto, English (U.K.)

**Page 22: [188] Formatted** 作者 5/28/2014 9:46:00 PM

No underline, Font color: Auto, English (U.K.)

**Page 22: [188] Formatted** 作者 5/28/2014 9:46:00 PM

No underline, Font color: Auto, English (U.K.)

**Page 22: [189] Formatted** 作者 5/28/2014 9:46:00 PM

No underline, Font color: Auto, English (U.K.)

**Page 22: [189] Formatted** 作者 5/28/2014 9:46:00 PM

No underline, Font color: Auto, English (U.K.)

**Page 22: [190] Formatted** 作者 5/28/2014 9:46:00 PM

No underline, Font color: Auto, English (U.K.)

**Page 22: [190] Formatted** 作者 5/28/2014 9:46:00 PM

No underline, Font color: Auto, English (U.K.)

**Page 22: [191] Formatted Table** Windows 用户 5/20/2014 9:08:00 AM

Formatted Table

**Page 22: [192] Formatted** 作者 5/28/2014 9:46:00 PM

No underline, Font color: Auto, English (U.K.)

**Page 22: [192] Formatted** 作者 5/28/2014 9:46:00 PM

No underline, Font color: Auto, English (U.K.)

**Page 22: [193] Formatted** 作者 5/28/2014 9:46:00 PM

No underline, Font color: Auto, English (U.K.)

**Page 22: [193] Formatted** 作者 5/28/2014 9:46:00 PM

No underline, Font color: Auto, English (U.K.)

**Page 22: [194] Formatted** 作者 5/28/2014 9:46:00 PM

No underline, Font color: Auto, English (U.K.)

**Page 22: [194] Formatted** 作者 5/28/2014 9:46:00 PM

No underline, Font color: Auto, English (U.K.)



1  
2  
3  
4  
5  
6  
7  
8  
9  
10  
11 **Page 22: [195] Formatted** 作者 5/28/2014 9:46:00 PM

12 No underline, Font color: Auto, English (U.K.)

13 **Page 22: [195] Formatted** 作者 5/28/2014 9:46:00 PM

14 No underline, Font color: Auto, English (U.K.)

15 **Page 22: [196] Formatted** 作者 5/28/2014 9:46:00 PM

16 No underline, Font color: Auto, English (U.K.)

17 **Page 22: [196] Formatted** 作者 5/28/2014 9:46:00 PM

18 No underline, Font color: Auto, English (U.K.)

19 **Page 22: [197] Formatted** 作者 5/28/2014 9:46:00 PM

20 No underline, Font color: Auto, English (U.K.)

21 **Page 22: [197] Formatted** 作者 5/28/2014 9:46:00 PM

22 No underline, Font color: Auto, English (U.K.)

23 **Page 22: [198] Formatted** 作者 5/28/2014 9:46:00 PM

24 No underline, Font color: Auto, English (U.K.)

25 **Page 22: [198] Formatted** 作者 5/28/2014 9:46:00 PM

26 No underline, Font color: Auto, English (U.K.)

27 **Page 22: [199] Formatted** 作者 5/28/2014 9:46:00 PM

28 No underline, Font color: Auto, English (U.K.)

29 **Page 22: [199] Formatted** 作者 5/28/2014 9:46:00 PM

30 No underline, Font color: Auto, English (U.K.)

31 **Page 22: [200] Formatted** 作者 5/28/2014 9:46:00 PM

32 No underline, Font color: Auto, English (U.K.)

33 **Page 22: [200] Formatted** 作者 5/28/2014 9:46:00 PM

34 No underline, Font color: Auto, English (U.K.)

35 **Page 22: [201] Formatted** 作者 5/28/2014 9:46:00 PM

36 No underline, Font color: Auto, English (U.K.)

37 **Page 22: [201] Formatted** 作者 5/28/2014 9:46:00 PM

38 No underline, Font color: Auto, English (U.K.)

39 **Page 22: [202] Formatted** 作者 5/28/2014 9:46:00 PM

40 No underline, Font color: Auto, English (U.K.)

41 **Page 22: [202] Formatted** 作者 5/28/2014 9:46:00 PM

42 No underline, Font color: Auto, English (U.K.)

43 **Page 22: [203] Formatted** 作者 5/28/2014 9:46:00 PM

44 No underline, Font color: Auto, English (U.K.)

45 **Page 22: [203] Formatted** 作者 5/28/2014 9:46:00 PM

46 No underline, Font color: Auto, English (U.K.)

47 **Page 22: [204] Formatted** 作者 5/28/2014 9:46:00 PM

48 No underline, Font color: Auto, English (U.K.)

1  
2  
3  
4  
5  
6  
7  
8  
9  
10  
11 **Page 22: [204] Formatted** 作者 5/28/2014 9:46:00 PM

12 No underline, Font color: Auto, English (U.K.)

13  
14 **Page 22: [205] Formatted Table** Windows 用户 5/20/2014 9:08:00 AM

15 Formatted Table

16  
17 **Page 22: [206] Formatted** 作者 5/28/2014 9:46:00 PM

18 No underline, Font color: Auto, English (U.K.)

19  
20 **Page 22: [206] Formatted** 作者 5/28/2014 9:46:00 PM

21 No underline, Font color: Auto, English (U.K.)

22  
23 **Page 22: [207] Formatted** 作者 5/28/2014 9:46:00 PM

24 No underline, Font color: Auto, English (U.K.)

25  
26 **Page 22: [207] Formatted** 作者 5/28/2014 9:46:00 PM

27 No underline, Font color: Auto, English (U.K.)

28  
29 **Page 22: [208] Formatted** 作者 5/28/2014 9:46:00 PM

30 No underline, Font color: Auto, English (U.K.)

31  
32 **Page 22: [208] Formatted** 作者 5/28/2014 9:46:00 PM

33 No underline, Font color: Auto, English (U.K.)

34  
35 **Page 22: [209] Formatted** 作者 5/28/2014 9:46:00 PM

36 No underline, Font color: Auto, English (U.K.)

37  
38 **Page 22: [209] Formatted** 作者 5/28/2014 9:46:00 PM

39 No underline, Font color: Auto, English (U.K.)

40  
41 **Page 22: [210] Formatted** 作者 5/28/2014 9:46:00 PM

42 No underline, Font color: Auto, English (U.K.)

43  
44 **Page 22: [210] Formatted** 作者 5/28/2014 9:46:00 PM

45 No underline, Font color: Auto, English (U.K.)

46  
47 **Page 22: [211] Formatted** 作者 5/28/2014 9:46:00 PM

48 No underline, Font color: Auto, English (U.K.)

49  
50 **Page 22: [211] Formatted** 作者 5/28/2014 9:46:00 PM

51 No underline, Font color: Auto, English (U.K.)

52  
53 **Page 22: [212] Formatted** 作者 5/28/2014 9:46:00 PM

54 No underline, Font color: Auto, English (U.K.)

55  
56 **Page 22: [212] Formatted** 作者 5/28/2014 9:46:00 PM

57 No underline, Font color: Auto, English (U.K.)

58  
59 **Page 22: [213] Formatted** 作者 5/28/2014 9:46:00 PM

60 No underline, Font color: Auto, English (U.K.)

**Page 22: [213] Formatted** 作者 5/28/2014 9:46:00 PM

No underline, Font color: Auto, English (U.K.)

**Page 22: [214] Formatted** 作者 5/28/2014 9:46:00 PM

No underline, Font color: Auto, English (U.K.)

1  
2  
3  
4  
5  
6  
7  
8  
9  
10  
11 **Page 22: [214] Formatted** 作者 5/28/2014 9:46:00 PM

12 No underline, Font color: Auto, English (U.K.)

13 **Page 22: [215] Formatted** 作者 5/28/2014 9:46:00 PM

14 No underline, Font color: Auto, English (U.K.)

15 **Page 22: [215] Formatted** 作者 5/28/2014 9:46:00 PM

16 No underline, Font color: Auto, English (U.K.)

17 **Page 22: [216] Formatted** 作者 5/28/2014 9:46:00 PM

18 No underline, Font color: Auto, English (U.K.)

19 **Page 22: [216] Formatted** 作者 5/28/2014 9:46:00 PM

20 No underline, Font color: Auto, English (U.K.)

21 **Page 22: [217] Formatted** 作者 5/28/2014 9:46:00 PM

22 No underline, Font color: Auto, English (U.K.)

23 **Page 22: [217] Formatted** 作者 5/28/2014 9:46:00 PM

24 No underline, Font color: Auto, English (U.K.)

25 **Page 22: [218] Formatted** 作者 5/28/2014 9:46:00 PM

26 No underline, Font color: Auto, English (U.K.)

27 **Page 22: [218] Formatted** 作者 5/28/2014 9:46:00 PM

28 No underline, Font color: Auto, English (U.K.)

29 **Page 22: [219] Formatted** 作者 5/28/2014 9:46:00 PM

30 No underline, Font color: Auto, English (U.K.)

31 **Page 22: [219] Formatted** 作者 5/28/2014 9:46:00 PM

32 No underline, Font color: Auto, English (U.K.)

33 **Page 22: [220] Formatted** 作者 5/28/2014 9:46:00 PM

34 No underline, Font color: Auto, English (U.K.)

35 **Page 22: [220] Formatted** 作者 5/28/2014 9:46:00 PM

36 No underline, Font color: Auto, English (U.K.)

37 **Page 22: [221] Formatted** 作者 5/28/2014 9:46:00 PM

38 No underline, Font color: Auto, English (U.K.)

39 **Page 22: [221] Formatted** 作者 5/28/2014 9:46:00 PM

40 No underline, Font color: Auto, English (U.K.)

41 **Page 22: [222] Formatted** 作者 5/28/2014 9:46:00 PM

42 No underline, Font color: Auto, English (U.K.)

43 **Page 22: [222] Formatted** 作者 5/28/2014 9:46:00 PM

44 No underline, Font color: Auto, English (U.K.)

45 **Page 22: [223] Formatted** 作者 5/28/2014 9:46:00 PM

46 No underline, Font color: Auto, English (U.K.)

47 **Page 22: [223] Formatted** 作者 5/28/2014 9:46:00 PM

48 No underline, Font color: Auto, English (U.K.)

1  
2  
3  
4  
5  
6  
7  
8  
9  
10  
11 **Page 22: [224] Formatted** 作者 5/28/2014 9:46:00 PM

12 No underline, Font color: Auto, English (U.K.)

13  
14 **Page 22: [224] Formatted** 作者 5/28/2014 9:46:00 PM

15 No underline, Font color: Auto, English (U.K.)

16  
17 **Page 22: [225] Formatted** 作者 5/28/2014 9:46:00 PM

18 No underline, Font color: Auto, English (U.K.)

19  
20 **Page 22: [225] Formatted** 作者 5/28/2014 9:46:00 PM

21 No underline, Font color: Auto, English (U.K.)

22  
23 **Page 22: [226] Formatted** 作者 5/28/2014 9:46:00 PM

24 No underline, Font color: Auto, English (U.K.)

25  
26 **Page 22: [226] Formatted** 作者 5/28/2014 9:46:00 PM

27 No underline, Font color: Auto, English (U.K.)

28  
29 **Page 22: [227] Formatted** 作者 5/28/2014 9:46:00 PM

30 No underline, Font color: Auto, English (U.K.)

31  
32 **Page 22: [227] Formatted** 作者 5/28/2014 9:46:00 PM

33 No underline, Font color: Auto, English (U.K.)

34  
35 **Page 22: [228] Formatted** 作者 5/28/2014 9:46:00 PM

36 No underline, Font color: Auto, English (U.K.)

37  
38 **Page 22: [228] Formatted** 作者 5/28/2014 9:46:00 PM

39 No underline, Font color: Auto, English (U.K.)

40  
41 **Page 22: [229] Formatted** 作者 5/28/2014 9:46:00 PM

42 No underline, Font color: Auto, English (U.K.)

43  
44 **Page 22: [229] Formatted** 作者 5/28/2014 9:46:00 PM

45 No underline, Font color: Auto, English (U.K.)

46  
47 **Page 22: [230] Formatted** 作者 5/28/2014 9:46:00 PM

48 No underline, Font color: Auto, English (U.K.)

49  
50 **Page 22: [230] Formatted** 作者 5/28/2014 9:46:00 PM

51 No underline, Font color: Auto, English (U.K.)

52  
53 **Page 22: [231] Formatted** 作者 5/28/2014 9:46:00 PM

54 No underline, Font color: Auto, English (U.K.)

55  
56 **Page 22: [231] Formatted** 作者 5/28/2014 9:46:00 PM

57 No underline, Font color: Auto, English (U.K.)

58  
59 **Page 22: [232] Formatted** 作者 5/28/2014 9:46:00 PM

60 English (U.K.)

**Page 22: [233] Formatted** 作者 5/28/2014 9:46:00 PM

No underline, Font color: Auto, English (U.K.)

**Page 23: [234] Formatted** 作者 5/28/2014 9:46:00 PM

English (U.K.)

1  
2  
3  
4  
5  
6  
7  
8  
9  
10  
11 **Page 23: [235] Formatted** 作者 5/28/2014 9:46:00 PM

12 No underline, Font color: Auto, English (U.K.)

13  
14 **Page 23: [235] Formatted** 作者 5/28/2014 9:46:00 PM

15 No underline, Font color: Auto, English (U.K.)

16  
17 **Page 23: [236] Formatted** 作者 5/28/2014 9:46:00 PM

18 No underline, Font color: Auto, English (U.K.)

19  
20 **Page 23: [236] Formatted** 作者 5/28/2014 9:46:00 PM

21 No underline, Font color: Auto, English (U.K.)

22  
23 **Page 23: [237] Formatted** 作者 5/28/2014 9:46:00 PM

24 No underline, Font color: Auto, English (U.K.)

25  
26 **Page 23: [237] Formatted** 作者 5/28/2014 9:46:00 PM

27 No underline, Font color: Auto, English (U.K.)

28  
29 **Page 23: [238] Formatted** 作者 5/28/2014 9:46:00 PM

30 No underline, Font color: Auto, English (U.K.)

31  
32 **Page 23: [238] Formatted** 作者 5/28/2014 9:46:00 PM

33 No underline, Font color: Auto, English (U.K.)

34  
35 **Page 23: [239] Formatted** 作者 5/28/2014 9:46:00 PM

36 No underline, Font color: Auto, English (U.K.)

37  
38 **Page 23: [239] Formatted** 作者 5/28/2014 9:46:00 PM

39 No underline, Font color: Auto, English (U.K.)

40  
41 **Page 23: [240] Formatted** 作者 5/28/2014 9:46:00 PM

42 No underline, Font color: Auto, English (U.K.)

43  
44 **Page 23: [240] Formatted** 作者 5/28/2014 9:46:00 PM

45 No underline, Font color: Auto, English (U.K.)

46  
47 **Page 23: [241] Formatted** 作者 5/28/2014 9:46:00 PM

48 No underline, Font color: Auto, English (U.K.)

49  
50 **Page 23: [241] Formatted** 作者 5/28/2014 9:46:00 PM

51 No underline, Font color: Auto, English (U.K.)

52  
53 **Page 23: [242] Formatted** 作者 5/28/2014 9:46:00 PM

54 No underline, Font color: Auto, English (U.K.)

55  
56 **Page 23: [242] Formatted** 作者 5/28/2014 9:46:00 PM

57 No underline, Font color: Auto, English (U.K.)

58  
59 **Page 23: [243] Formatted** 作者 5/28/2014 9:46:00 PM

60 No underline, Font color: Auto, English (U.K.)

**Page 23: [243] Formatted** 作者 5/28/2014 9:46:00 PM

No underline, Font color: Auto, English (U.K.)

**Page 23: [244] Formatted** 作者 5/28/2014 9:46:00 PM

No underline, Font color: Auto, English (U.K.)

1  
2  
3  
4  
5  
6  
7  
8  
9  
10  
11 **Page 23: [244] Formatted** 作者 5/28/2014 9:46:00 PM

12 No underline, Font color: Auto, English (U.K.)

13  
14 **Page 23: [245] Formatted** 作者 5/28/2014 9:46:00 PM

15 No underline, Font color: Auto, English (U.K.)

16  
17 **Page 23: [245] Formatted** 作者 5/28/2014 9:46:00 PM

18 No underline, Font color: Auto, English (U.K.)

19  
20 **Page 23: [246] Formatted** 作者 5/28/2014 9:46:00 PM

21 No underline, Font color: Auto, English (U.K.)

22  
23 **Page 23: [246] Formatted** 作者 5/28/2014 9:46:00 PM

24 No underline, Font color: Auto, English (U.K.)

25  
26 **Page 23: [247] Formatted** 作者 5/28/2014 9:46:00 PM

27 No underline, Font color: Auto, English (U.K.)

28  
29 **Page 23: [247] Formatted** 作者 5/28/2014 9:46:00 PM

30 No underline, Font color: Auto, English (U.K.)

31  
32 **Page 23: [248] Formatted** 作者 5/28/2014 9:46:00 PM

33 No underline, Font color: Auto, English (U.K.)

34  
35 **Page 23: [248] Formatted** 作者 5/28/2014 9:46:00 PM

36 No underline, Font color: Auto, English (U.K.)

37  
38 **Page 23: [249] Formatted** 作者 5/28/2014 9:46:00 PM

39 No underline, Font color: Auto, English (U.K.)

40  
41 **Page 23: [249] Formatted** 作者 5/28/2014 9:46:00 PM

42 No underline, Font color: Auto, English (U.K.)

43  
44 **Page 23: [250] Formatted** 作者 5/28/2014 9:46:00 PM

45 No underline, Font color: Auto, English (U.K.)

46  
47 **Page 23: [250] Formatted** 作者 5/28/2014 9:46:00 PM

48 No underline, Font color: Auto, English (U.K.)

49  
50 **Page 23: [251] Formatted** 作者 5/28/2014 9:46:00 PM

51 No underline, Font color: Auto, English (U.K.)

52  
53 **Page 23: [251] Formatted** 作者 5/28/2014 9:46:00 PM

54 No underline, Font color: Auto, English (U.K.)

55  
56 **Page 23: [252] Formatted** 作者 5/28/2014 9:46:00 PM

57 No underline, Font color: Auto, English (U.K.)

58  
59 **Page 23: [252] Formatted** 作者 5/28/2014 9:46:00 PM

60 No underline, Font color: Auto, English (U.K.)

**Page 23: [253] Formatted** 作者 5/28/2014 9:46:00 PM

No underline, Font color: Auto, English (U.K.)

**Page 23: [253] Formatted** 作者 5/28/2014 9:46:00 PM

No underline, Font color: Auto, English (U.K.)

1  
2  
3  
4  
5  
6  
7  
8  
9  
10  
11 **Page 23: [254] Formatted** 作者 5/28/2014 9:46:00 PM

12 No underline, Font color: Auto, English (U.K.)

13 **Page 23: [254] Formatted** 作者 5/28/2014 9:46:00 PM

14 No underline, Font color: Auto, English (U.K.)

15 **Page 23: [255] Formatted** 作者 5/28/2014 9:46:00 PM

16 No underline, Font color: Auto, English (U.K.)

17 **Page 23: [255] Formatted** 作者 5/28/2014 9:46:00 PM

18 No underline, Font color: Auto, English (U.K.)

19 **Page 23: [256] Formatted** 作者 5/28/2014 9:46:00 PM

20 No underline, Font color: Auto, English (U.K.)

21 **Page 23: [256] Formatted** 作者 5/28/2014 9:46:00 PM

22 No underline, Font color: Auto, English (U.K.)

23 **Page 23: [257] Formatted** 作者 5/28/2014 9:46:00 PM

24 No underline, Font color: Auto, English (U.K.)

25 **Page 23: [257] Formatted** 作者 5/28/2014 9:46:00 PM

26 No underline, Font color: Auto, English (U.K.)

27 **Page 23: [258] Formatted** 作者 5/28/2014 9:46:00 PM

28 No underline, Font color: Auto, English (U.K.)

29 **Page 23: [258] Formatted** 作者 5/28/2014 9:46:00 PM

30 No underline, Font color: Auto, English (U.K.)

31 **Page 23: [259] Formatted** 作者 5/28/2014 9:46:00 PM

32 No underline, Font color: Auto, English (U.K.)

33 **Page 23: [259] Formatted** 作者 5/28/2014 9:46:00 PM

34 No underline, Font color: Auto, English (U.K.)

35 **Page 23: [260] Formatted** 作者 5/28/2014 9:46:00 PM

36 No underline, Font color: Auto, English (U.K.)

37 **Page 23: [260] Formatted** 作者 5/28/2014 9:46:00 PM

38 No underline, Font color: Auto, English (U.K.)

39 **Page 23: [261] Formatted** 作者 5/28/2014 9:46:00 PM

40 No underline, Font color: Auto, English (U.K.)

41 **Page 23: [261] Formatted** 作者 5/28/2014 9:46:00 PM

42 No underline, Font color: Auto, English (U.K.)

43 **Page 23: [262] Formatted** 作者 5/28/2014 9:46:00 PM

44 No underline, Font color: Auto, English (U.K.)

45 **Page 23: [262] Formatted** 作者 5/28/2014 9:46:00 PM

46 No underline, Font color: Auto, English (U.K.)

47 **Page 23: [263] Formatted** 作者 5/28/2014 9:46:00 PM

48 No underline, Font color: Auto, English (U.K.)



1  
2  
3  
4  
5  
6  
7  
8  
9  
10  
11 **Page 23: [263] Formatted** 作者 5/28/2014 9:46:00 PM

12 No underline, Font color: Auto, English (U.K.)

13  
14 **Page 23: [264] Formatted** 作者 5/28/2014 9:46:00 PM

15 No underline, Font color: Auto, English (U.K.)

16  
17 **Page 23: [264] Formatted** 作者 5/28/2014 9:46:00 PM

18 No underline, Font color: Auto, English (U.K.)

19  
20 **Page 23: [265] Formatted** 作者 5/28/2014 9:46:00 PM

21 No underline, Font color: Auto, English (U.K.)

22  
23 **Page 23: [265] Formatted** 作者 5/28/2014 9:46:00 PM

24 No underline, Font color: Auto, English (U.K.)

25  
26 **Page 23: [266] Formatted** 作者 5/28/2014 9:46:00 PM

27 No underline, Font color: Auto, English (U.K.)

28  
29 **Page 23: [266] Formatted** 作者 5/28/2014 9:46:00 PM

30 No underline, Font color: Auto, English (U.K.)

31  
32 **Page 23: [267] Formatted** 作者 5/28/2014 9:46:00 PM

33 No underline, Font color: Auto, English (U.K.)

34  
35 **Page 23: [267] Formatted** 作者 5/28/2014 9:46:00 PM

36 No underline, Font color: Auto, English (U.K.)

37  
38 **Page 23: [268] Formatted** 作者 5/28/2014 9:46:00 PM

39 No underline, Font color: Auto, English (U.K.)

40  
41 **Page 23: [268] Formatted** 作者 5/28/2014 9:46:00 PM

42 No underline, Font color: Auto, English (U.K.)

43  
44 **Page 23: [269] Formatted** 作者 5/28/2014 9:46:00 PM

45 No underline, Font color: Auto, English (U.K.)

46  
47 **Page 23: [269] Formatted** 作者 5/28/2014 9:46:00 PM

48 No underline, Font color: Auto, English (U.K.)

49  
50 **Page 23: [270] Formatted** 作者 5/28/2014 9:46:00 PM

51 No underline, Font color: Auto, English (U.K.)

52  
53 **Page 23: [270] Formatted** 作者 5/28/2014 9:46:00 PM

54 No underline, Font color: Auto, English (U.K.)

55  
56 **Page 23: [271] Formatted** 作者 5/28/2014 9:46:00 PM

57 No underline, Font color: Auto, English (U.K.)

58  
59 **Page 23: [271] Formatted** 作者 5/28/2014 9:46:00 PM

60 No underline, Font color: Auto, English (U.K.)

**Page 23: [272] Formatted** 作者 5/28/2014 9:46:00 PM

No underline, Font color: Auto, English (U.K.)

**Page 23: [272] Formatted** 作者 5/28/2014 9:46:00 PM

No underline, Font color: Auto, English (U.K.)



1  
2  
3  
4  
5  
6  
7  
8  
9  
10  
11 **Page 23: [273] Formatted** 作者 5/28/2014 9:46:00 PM

12 No underline, Font color: Auto, English (U.K.)

13 **Page 23: [273] Formatted** 作者 5/28/2014 9:46:00 PM

14 No underline, Font color: Auto, English (U.K.)

15 **Page 23: [274] Formatted** 作者 5/28/2014 9:46:00 PM

16 No underline, Font color: Auto, English (U.K.)

17 **Page 23: [274] Formatted** 作者 5/28/2014 9:46:00 PM

18 No underline, Font color: Auto, English (U.K.)

19 **Page 23: [275] Formatted** 作者 5/28/2014 9:46:00 PM

20 No underline, Font color: Auto, English (U.K.)

21 **Page 23: [275] Formatted** 作者 5/28/2014 9:46:00 PM

22 No underline, Font color: Auto, English (U.K.)

23 **Page 23: [276] Formatted** 作者 5/28/2014 9:46:00 PM

24 No underline, Font color: Auto, English (U.K.)

25 **Page 23: [276] Formatted** 作者 5/28/2014 9:46:00 PM

26 No underline, Font color: Auto, English (U.K.)

27 **Page 23: [277] Formatted** 作者 5/28/2014 9:46:00 PM

28 No underline, Font color: Auto, English (U.K.)

29 **Page 23: [277] Formatted** 作者 5/28/2014 9:46:00 PM

30 No underline, Font color: Auto, English (U.K.)

31 **Page 23: [278] Formatted** 作者 5/28/2014 9:46:00 PM

32 No underline, Font color: Auto, English (U.K.)

33 **Page 23: [279] Formatted** Windows 用户 5/20/2014 8:59:00 AM

34 Justified

35 **Page 23: [280] Formatted** 作者 5/28/2014 9:46:00 PM

36 English (U.K.)

37 **Page 23: [281] Formatted** 作者 5/28/2014 9:46:00 PM

38 No underline, Font color: Auto, English (U.K.)

39 **Page 23: [281] Formatted** 作者 5/28/2014 9:46:00 PM

40 No underline, Font color: Auto, English (U.K.)

41 **Page 23: [282] Formatted** 作者 5/28/2014 9:46:00 PM

42 No underline, Font color: Auto, English (U.K.)

43 **Page 23: [282] Formatted** 作者 5/28/2014 9:46:00 PM

44 No underline, Font color: Auto, English (U.K.)

45 **Page 23: [283] Formatted** 作者 5/28/2014 9:46:00 PM

46 No underline, Font color: Auto, English (U.K.)

47 **Page 23: [283] Formatted** 作者 5/28/2014 9:46:00 PM

48 No underline, Font color: Auto, English (U.K.)

1  
2  
3  
4  
5  
6  
7  
8  
9  
10  
11 **Page 23: [284] Formatted** 作者 5/28/2014 9:46:00 PM

12 No underline, Font color: Auto, English (U.K.)

13  
14 **Page 23: [285] Formatted** Windows 用户 5/20/2014 8:59:00 AM

15 Justified

16  
17 **Page 23: [286] Formatted** 作者 5/28/2014 9:46:00 PM

18 English (U.K.)

19  
20 **Page 23: [287] Formatted** 作者 5/28/2014 9:46:00 PM

21 No underline, Font color: Auto, English (U.K.)

22  
23 **Page 23: [287] Formatted** 作者 5/28/2014 9:46:00 PM

24 No underline, Font color: Auto, English (U.K.)

25  
26 **Page 23: [288] Formatted** 作者 5/28/2014 9:46:00 PM

27 No underline, Font color: Auto, English (U.K.)

28  
29 **Page 23: [288] Formatted** 作者 5/28/2014 9:46:00 PM

30 No underline, Font color: Auto, English (U.K.)

31  
32 **Page 23: [289] Formatted** 作者 5/28/2014 9:46:00 PM

33 No underline, Font color: Auto, English (U.K.)

34  
35 **Page 23: [289] Formatted** 作者 5/28/2014 9:46:00 PM

36 No underline, Font color: Auto, English (U.K.)

37  
38 **Page 23: [290] Formatted** 作者 5/28/2014 9:46:00 PM

39 No underline, Font color: Auto, English (U.K.)

40  
41 **Page 23: [290] Formatted** 作者 5/28/2014 9:46:00 PM

42 No underline, Font color: Auto, English (U.K.)

43  
44 **Page 23: [291] Formatted** 作者 5/28/2014 9:46:00 PM

45 No underline, Font color: Auto, English (U.K.)

46  
47 **Page 23: [292] Formatted** Windows 用户 5/20/2014 8:59:00 AM

48 Justified

49  
50 **Page 23: [293] Formatted** 作者 5/28/2014 9:46:00 PM

51 English (U.K.)

52  
53 **Page 23: [294] Formatted** 作者 5/28/2014 9:46:00 PM

54 No underline, Font color: Auto, English (U.K.)

55  
56 **Page 23: [294] Formatted** 作者 5/28/2014 9:46:00 PM

57 No underline, Font color: Auto, English (U.K.)

58  
59 **Page 23: [295] Formatted** 作者 5/28/2014 9:46:00 PM

60 No underline, Font color: Auto, English (U.K.)

**Page 23: [295] Formatted** 作者 5/28/2014 9:46:00 PM

No underline, Font color: Auto, English (U.K.)

**Page 23: [296] Formatted** 作者 5/28/2014 9:46:00 PM

No underline, Font color: Auto, English (U.K.)

1  
2  
3  
4  
5  
6  
7  
8  
9  
10  
11 **Page 23: [296] Formatted** 作者 5/28/2014 9:46:00 PM

12 No underline, Font color: Auto, English (U.K.)

13 **Page 23: [297] Formatted** 作者 5/28/2014 9:46:00 PM

14 No underline, Font color: Auto, English (U.K.)

15 **Page 23: [298] Formatted** Windows 用户 5/20/2014 8:59:00 AM

16 Justified

17 **Page 23: [299] Formatted** 作者 5/28/2014 9:46:00 PM

18 English (U.K.)

19 **Page 23: [300] Formatted** 作者 5/28/2014 9:46:00 PM

20 No underline, Font color: Auto, English (U.K.)

21 **Page 23: [300] Formatted** 作者 5/28/2014 9:46:00 PM

22 No underline, Font color: Auto, English (U.K.)

23 **Page 23: [301] Formatted** 作者 5/28/2014 9:46:00 PM

24 No underline, Font color: Auto, English (U.K.)

25 **Page 23: [301] Formatted** 作者 5/28/2014 9:46:00 PM

26 No underline, Font color: Auto, English (U.K.)

27 **Page 23: [302] Formatted** 作者 5/28/2014 9:46:00 PM

28 No underline, Font color: Auto, English (U.K.)

29 **Page 23: [302] Formatted** 作者 5/28/2014 9:46:00 PM

30 No underline, Font color: Auto, English (U.K.)

31 **Page 23: [303] Formatted** 作者 5/28/2014 9:46:00 PM

32 No underline, Font color: Auto, English (U.K.)

33 **Page 23: [304] Formatted** Windows 用户 5/20/2014 8:59:00 AM

34 Justified

35 **Page 23: [305] Formatted** 作者 5/28/2014 9:46:00 PM

36 English (U.K.)

37 **Page 23: [306] Formatted** 作者 5/28/2014 9:46:00 PM

38 No underline, Font color: Auto, English (U.K.)

39 **Page 23: [306] Formatted** 作者 5/28/2014 9:46:00 PM

40 No underline, Font color: Auto, English (U.K.)

41 **Page 23: [307] Formatted** 作者 5/28/2014 9:46:00 PM

42 No underline, Font color: Auto, English (U.K.)

43 **Page 23: [307] Formatted** 作者 5/28/2014 9:46:00 PM

44 No underline, Font color: Auto, English (U.K.)

45 **Page 23: [308] Formatted** 作者 5/28/2014 9:46:00 PM

46 No underline, Font color: Auto, English (U.K.)

47 **Page 23: [308] Formatted** 作者 5/28/2014 9:46:00 PM

48 No underline, Font color: Auto, English (U.K.)

1  
2  
3  
4  
5  
6  
7  
8  
9  
10  
11 **Page 23: [309] Formatted** 作者 5/28/2014 9:46:00 PM

12 No underline, Font color: Auto, English (U.K.)

13  
14 **Page 23: [310] Formatted** Windows 用户 5/20/2014 8:59:00 AM

15 Justified

16  
17 **Page 23: [311] Formatted** 作者 5/28/2014 9:46:00 PM

18 English (U.K.)

19  
20 **Page 23: [312] Formatted** 作者 5/28/2014 9:46:00 PM

21 No underline, Font color: Auto, English (U.K.)

22  
23 **Page 23: [312] Formatted** 作者 5/28/2014 9:46:00 PM

24 No underline, Font color: Auto, English (U.K.)

25  
26 **Page 23: [313] Formatted** 作者 5/28/2014 9:46:00 PM

27 No underline, Font color: Auto, English (U.K.)

28  
29 **Page 23: [313] Formatted** 作者 5/28/2014 9:46:00 PM

30 No underline, Font color: Auto, English (U.K.)

31  
32 **Page 24: [314] Formatted** 作者 5/28/2014 9:46:00 PM

33 No underline, Font color: Auto, English (U.K.)

34  
35 **Page 24: [314] Formatted** 作者 5/28/2014 9:46:00 PM

36 No underline, Font color: Auto, English (U.K.)

37  
38 **Page 24: [315] Formatted** 作者 5/28/2014 9:46:00 PM

39 No underline, Font color: Auto, English (U.K.)

40  
41 **Page 24: [315] Formatted** 作者 5/28/2014 9:46:00 PM

42 No underline, Font color: Auto, English (U.K.)

43  
44 **Page 24: [316] Formatted** 作者 5/28/2014 9:46:00 PM

45 No underline, Font color: Auto, English (U.K.)

46  
47 **Page 24: [316] Formatted** 作者 5/28/2014 9:46:00 PM

48 No underline, Font color: Auto, English (U.K.)

49  
50 **Page 24: [317] Formatted** 作者 5/28/2014 9:46:00 PM

51 No underline, Font color: Auto, English (U.K.)

52  
53 **Page 24: [317] Formatted** 作者 5/28/2014 9:46:00 PM

54 No underline, Font color: Auto, English (U.K.)

55  
56 **Page 24: [318] Formatted** 作者 5/28/2014 9:46:00 PM

57 No underline, Font color: Auto, English (U.K.)

58  
59 **Page 24: [318] Formatted** 作者 5/28/2014 9:46:00 PM

60 No underline, Font color: Auto, English (U.K.)

**Page 24: [319] Formatted** 作者 5/28/2014 9:46:00 PM

No underline, Font color: Auto, English (U.K.)

**Page 24: [320] Formatted** Windows 用户 5/20/2014 8:59:00 AM

Justified, Space Before: 0 pt, After: 0 pt, Don't keep with next, Don't keep lines together

1  
2  
3  
4  
5  
6  
7  
8  
9  
10  
11 **Page 24: [321] Formatted** 作者 5/28/2014 9:46:00 PM

12 Font: 10.5 pt, Not Bold, English (U.K.)

13 **Page 24: [322] Formatted** 作者 5/28/2014 9:46:00 PM

14 No underline, Font color: Auto, English (U.K.)

15 **Page 24: [322] Formatted** 作者 5/28/2014 9:46:00 PM

16 No underline, Font color: Auto, English (U.K.)

17 **Page 24: [323] Formatted** 作者 5/28/2014 9:46:00 PM

18 No underline, Font color: Auto, English (U.K.)

19 **Page 24: [323] Formatted** 作者 5/28/2014 9:46:00 PM

20 No underline, Font color: Auto, English (U.K.)

21 **Page 24: [324] Formatted** 作者 5/28/2014 9:46:00 PM

22 No underline, Font color: Auto, English (U.K.)

23 **Page 24: [324] Formatted** 作者 5/28/2014 9:46:00 PM

24 No underline, Font color: Auto, English (U.K.)

25 **Page 24: [325] Formatted** 作者 5/28/2014 9:46:00 PM

26 No underline, Font color: Auto, English (U.K.)

27 **Page 24: [326] Formatted** Windows 用户 5/20/2014 8:59:00 AM

28 Justified, Space Before: 0 pt, After: 0 pt, Don't keep with next, Don't keep lines together

29 **Page 24: [327] Formatted** 作者 5/28/2014 9:46:00 PM

30 Font: 10.5 pt, Not Bold, English (U.K.)

31 **Page 24: [328] Formatted** 作者 5/28/2014 9:46:00 PM

32 No underline, Font color: Auto, English (U.K.)

33 **Page 24: [328] Formatted** 作者 5/28/2014 9:46:00 PM

34 No underline, Font color: Auto, English (U.K.)

35 **Page 24: [329] Formatted** 作者 5/28/2014 9:46:00 PM

36 No underline, Font color: Auto, English (U.K.)

37 **Page 24: [329] Formatted** 作者 5/28/2014 9:46:00 PM

38 No underline, Font color: Auto, English (U.K.)

39 **Page 24: [330] Formatted** 作者 5/28/2014 9:46:00 PM

40 No underline, Font color: Auto, English (U.K.)

41 **Page 24: [330] Formatted** 作者 5/28/2014 9:46:00 PM

42 No underline, Font color: Auto, English (U.K.)

43 **Page 24: [331] Formatted** 作者 5/28/2014 9:46:00 PM

44 No underline, Font color: Auto, English (U.K.)

45 **Page 24: [332] Formatted** Windows 用户 5/20/2014 8:59:00 AM

46 Justified, Space Before: 0 pt, After: 0 pt, Don't keep with next, Don't keep lines together

47 **Page 24: [333] Formatted** 作者 5/28/2014 9:46:00 PM

48 Font: 10.5 pt, Not Bold, English (U.K.)

1  
2  
3  
4  
5  
6  
7  
8  
9  
10  
11 **Page 24: [334] Formatted** 作者 5/28/2014 9:46:00 PM

12 No underline, Font color: Auto, English (U.K.)

13 **Page 24: [334] Formatted** 作者 5/28/2014 9:46:00 PM

14 No underline, Font color: Auto, English (U.K.)

15 **Page 24: [335] Formatted** 作者 5/28/2014 9:46:00 PM

16 No underline, Font color: Auto, English (U.K.)

17 **Page 24: [335] Formatted** 作者 5/28/2014 9:46:00 PM

18 No underline, Font color: Auto, English (U.K.)

19 **Page 24: [336] Formatted** 作者 5/28/2014 9:46:00 PM

20 No underline, Font color: Auto, English (U.K.)

21 **Page 24: [336] Formatted** 作者 5/28/2014 9:46:00 PM

22 No underline, Font color: Auto, English (U.K.)

23 **Page 24: [337] Formatted** 作者 5/28/2014 9:46:00 PM

24 No underline, Font color: Auto, English (U.K.)

25 **Page 24: [338] Formatted** Windows 用户 5/20/2014 8:59:00 AM

26 Justified, Space Before: 0 pt, After: 0 pt, Don't keep with next, Don't keep lines together

27 **Page 24: [339] Formatted** 作者 5/28/2014 9:46:00 PM

28 Font: 10.5 pt, Not Bold, English (U.K.)

29 **Page 24: [340] Formatted** 作者 5/28/2014 9:46:00 PM

30 No underline, Font color: Auto, English (U.K.)

31 **Page 24: [340] Formatted** 作者 5/28/2014 9:46:00 PM

32 No underline, Font color: Auto, English (U.K.)

33 **Page 24: [341] Formatted** 作者 5/28/2014 9:46:00 PM

34 No underline, Font color: Auto, English (U.K.)

35 **Page 24: [341] Formatted** 作者 5/28/2014 9:46:00 PM

36 No underline, Font color: Auto, English (U.K.)

37 **Page 24: [342] Formatted** 作者 5/28/2014 9:46:00 PM

38 No underline, Font color: Auto, English (U.K.)

39 **Page 24: [342] Formatted** 作者 5/28/2014 9:46:00 PM

40 No underline, Font color: Auto, English (U.K.)

41 **Page 24: [343] Formatted** 作者 5/28/2014 9:46:00 PM

42 No underline, Font color: Auto, English (U.K.)

43 **Page 24: [344] Formatted** Windows 用户 5/20/2014 8:59:00 AM

44 Justified, Space Before: 0 pt, After: 0 pt, Don't keep with next, Don't keep lines together

45 **Page 24: [345] Formatted** 作者 5/28/2014 9:46:00 PM

46 Font: 10.5 pt, Not Bold, English (U.K.)

47 **Page 24: [346] Formatted** 作者 5/28/2014 9:46:00 PM

48 No underline, Font color: Auto, English (U.K.)

1  
2  
3  
4  
5  
6  
7  
8  
9  
10  
11 **Page 24: [346] Formatted** 作者 5/28/2014 9:46:00 PM

12 No underline, Font color: Auto, English (U.K.)

13 **Page 24: [347] Formatted** 作者 5/28/2014 9:46:00 PM

14 No underline, Font color: Auto, English (U.K.)

15 **Page 24: [347] Formatted** 作者 5/28/2014 9:46:00 PM

16 No underline, Font color: Auto, English (U.K.)

17 **Page 24: [348] Formatted** 作者 5/28/2014 9:46:00 PM

18 No underline, Font color: Auto, English (U.K.)

19 **Page 25: [349] Formatted** 作者 5/28/2014 9:46:00 PM

20 English (U.K.)

21 **Page 25: [350] Formatted** 作者 5/28/2014 9:46:00 PM

22 No underline, Font color: Auto, English (U.K.)

23 **Page 25: [350] Formatted** 作者 5/28/2014 9:46:00 PM

24 No underline, Font color: Auto, English (U.K.)

25 **Page 25: [351] Formatted** Windows 用户 5/28/2014 9:46:00 PM

26 No underline, Font color: Auto, English (U.S.)

27 **Page 25: [352] Formatted Table** Windows 用户 5/23/2014 4:06:00 PM

28 Formatted Table

29 **Page 25: [353] Formatted** Windows 用户 5/28/2014 9:46:00 PM

30 English (U.S.)

31 **Page 25: [354] Formatted** Windows 用户 5/28/2014 9:46:00 PM

32 No underline, Font color: Auto, English (U.S.)

33 **Page 25: [354] Formatted** Windows 用户 5/28/2014 9:46:00 PM

34 No underline, Font color: Auto, English (U.S.)

35 **Page 25: [355] Formatted** Windows 用户 5/28/2014 9:46:00 PM

36 No underline, Font color: Auto, English (U.S.)

37 **Page 25: [355] Formatted** Windows 用户 5/28/2014 9:46:00 PM

38 No underline, Font color: Auto, English (U.S.)

39 **Page 25: [356] Formatted** Windows 用户 5/28/2014 9:46:00 PM

40 No underline, Font color: Auto, English (U.S.)

41 **Page 25: [356] Formatted** Windows 用户 5/28/2014 9:46:00 PM

42 No underline, Font color: Auto, English (U.S.)

43 **Page 25: [357] Formatted** Windows 用户 5/28/2014 9:46:00 PM

44 No underline, Font color: Auto, English (U.S.)

45 **Page 25: [357] Formatted** Windows 用户 5/28/2014 9:46:00 PM

46 No underline, Font color: Auto, English (U.S.)

47 **Page 25: [358] Formatted** Windows 用户 5/28/2014 9:46:00 PM

48 No underline, Font color: Auto, English (U.S.)



1  
2  
3  
4  
5  
6  
7  
8  
9  
10  
11 **Page 25: [358] Formatted** Windows 用户 5/28/2014 9:46:00 PM

12 No underline, Font color: Auto, English (U.S.)

13  
14 **Page 25: [359] Formatted** Windows 用户 5/28/2014 9:46:00 PM

15 No underline, Font color: Auto, English (U.S.)

16  
17 **Page 25: [359] Formatted** Windows 用户 5/28/2014 9:46:00 PM

18 No underline, Font color: Auto, English (U.S.)

19  
20 **Page 25: [360] Formatted** Windows 用户 5/28/2014 9:46:00 PM

21 No underline, Font color: Auto, English (U.S.)

22  
23 **Page 25: [360] Formatted** Windows 用户 5/28/2014 9:46:00 PM

24 No underline, Font color: Auto, English (U.S.)

25  
26 **Page 25: [361] Formatted** Windows 用户 5/28/2014 9:46:00 PM

27 No underline, Font color: Auto, English (U.S.)

28 **Page 25: [362] Formatted** 作者 5/28/2014 9:46:00 PM

29 No underline, Font color: Auto, English (U.K.)

30  
31 **Page 25: [363] Formatted** Windows 用户 5/28/2014 9:46:00 PM

32 No underline, Font color: Auto, English (U.S.)

33  
34 **Page 25: [363] Formatted** Windows 用户 5/28/2014 9:46:00 PM

35 No underline, Font color: Auto, English (U.S.)

36  
37 **Page 25: [364] Formatted** Windows 用户 5/28/2014 9:46:00 PM

38 No underline, Font color: Auto, English (U.S.)

39  
40 **Page 25: [364] Formatted** Windows 用户 5/28/2014 9:46:00 PM

41 No underline, Font color: Auto, English (U.S.)

42  
43 **Page 25: [365] Formatted** Windows 用户 5/28/2014 9:46:00 PM

44 No underline, Font color: Auto, English (U.S.)

45  
46 **Page 25: [365] Formatted** Windows 用户 5/28/2014 9:46:00 PM

47 No underline, Font color: Auto, English (U.S.)

48  
49 **Page 25: [366] Formatted** Windows 用户 5/28/2014 9:46:00 PM

50 No underline, Font color: Auto, English (U.S.)

51  
52 **Page 25: [366] Formatted** Windows 用户 5/28/2014 9:46:00 PM

53 No underline, Font color: Auto, English (U.S.)

54  
55 **Page 25: [367] Formatted** Windows 用户 5/28/2014 9:46:00 PM

56 No underline, Font color: Auto, English (U.S.)

57 **Page 25: [368] Formatted** 作者 5/28/2014 9:46:00 PM

58 No underline, Font color: Auto, English (U.K.)

59  
60 **Page 25: [369] Formatted** Windows 用户 5/28/2014 9:46:00 PM

No underline, Font color: Auto, English (U.S.)

**Page 25: [369] Formatted** Windows 用户 5/28/2014 9:46:00 PM

No underline, Font color: Auto, English (U.S.)



1  
2  
3  
4  
5  
6  
7  
8  
9  
10  
11 **Page 25: [370] Formatted** Windows 用户 5/28/2014 9:46:00 PM

12 No underline, Font color: Auto, English (U.S.)

13  
14 **Page 25: [370] Formatted** Windows 用户 5/28/2014 9:46:00 PM

15 No underline, Font color: Auto, English (U.S.)

16  
17 **Page 25: [371] Formatted** Windows 用户 5/28/2014 9:46:00 PM

18 No underline, Font color: Auto, English (U.S.)

19  
20 **Page 25: [371] Formatted** Windows 用户 5/28/2014 9:46:00 PM

21 No underline, Font color: Auto, English (U.S.)

22  
23 **Page 25: [372] Formatted** Windows 用户 5/28/2014 9:46:00 PM

24 No underline, Font color: Auto, English (U.S.)

25  
26 **Page 25: [372] Formatted** Windows 用户 5/28/2014 9:46:00 PM

27 No underline, Font color: Auto, English (U.S.)

28  
29 **Page 25: [373] Formatted** Windows 用户 5/28/2014 9:46:00 PM

30 No underline, Font color: Auto, English (U.S.)

31 **Page 25: [374] Formatted** 作者 5/28/2014 9:46:00 PM

32 No underline, Font color: Auto, English (U.K.)

33  
34 **Page 25: [375] Formatted** Windows 用户 5/28/2014 9:46:00 PM

35 No underline, Font color: Auto, English (U.S.)

36  
37 **Page 25: [375] Formatted** Windows 用户 5/28/2014 9:46:00 PM

38 No underline, Font color: Auto, English (U.S.)

39  
40 **Page 25: [376] Formatted** Windows 用户 5/28/2014 9:46:00 PM

41 No underline, Font color: Auto, English (U.S.)

42  
43 **Page 25: [376] Formatted** Windows 用户 5/28/2014 9:46:00 PM

44 No underline, Font color: Auto, English (U.S.)

45  
46 **Page 25: [377] Formatted** Windows 用户 5/28/2014 9:46:00 PM

47 No underline, Font color: Auto, English (U.S.)

48  
49 **Page 25: [377] Formatted** Windows 用户 5/28/2014 9:46:00 PM

50 No underline, Font color: Auto, English (U.S.)

51  
52 **Page 25: [378] Formatted** Windows 用户 5/28/2014 9:46:00 PM

53 No underline, Font color: Auto, English (U.S.)

54  
55 **Page 25: [378] Formatted** Windows 用户 5/28/2014 9:46:00 PM

56 No underline, Font color: Auto, English (U.S.)

57  
58 **Page 25: [379] Formatted** Windows 用户 5/28/2014 9:46:00 PM

59 No underline, Font color: Auto, English (U.S.)

60  
**Page 25: [379] Formatted** Windows 用户 5/28/2014 9:46:00 PM

No underline, Font color: Auto, English (U.S.)

**Page 25: [380] Formatted** Windows 用户 5/28/2014 9:46:00 PM

No underline, Font color: Auto, English (U.S.)

1  
2  
3  
4  
5  
6  
7  
8  
9  
10  
11 **Page 25: [380] Formatted** Windows 用户 5/28/2014 9:46:00 PM

12 No underline, Font color: Auto, English (U.S.)

13  
14 **Page 25: [381] Formatted** Windows 用户 5/28/2014 9:46:00 PM

15 No underline, Font color: Auto, English (U.S.)

16  
17 **Page 25: [381] Formatted** Windows 用户 5/28/2014 9:46:00 PM

18 No underline, Font color: Auto, English (U.S.)

19  
20 **Page 25: [382] Formatted** Windows 用户 5/28/2014 9:46:00 PM

21 No underline, Font color: Auto, English (U.S.)

22  
23 **Page 25: [382] Formatted** Windows 用户 5/28/2014 9:46:00 PM

24 No underline, Font color: Auto, English (U.S.)

25  
26 **Page 25: [383] Formatted** Windows 用户 5/28/2014 9:46:00 PM

27 No underline, Font color: Auto, English (U.S.)

28  
29 **Page 25: [383] Formatted** Windows 用户 5/28/2014 9:46:00 PM

30 No underline, Font color: Auto, English (U.S.)

31  
32 **Page 25: [384] Formatted** Windows 用户 5/28/2014 9:46:00 PM

33 No underline, Font color: Auto, English (U.S.)

34  
35 **Page 25: [384] Formatted** Windows 用户 5/28/2014 9:46:00 PM

36 No underline, Font color: Auto, English (U.S.)

37  
38 **Page 25: [385] Formatted** Windows 用户 5/28/2014 9:46:00 PM

39 No underline, Font color: Auto, English (U.S.)

40  
41 **Page 25: [385] Formatted** Windows 用户 5/28/2014 9:46:00 PM

42 No underline, Font color: Auto, English (U.S.)

43  
44 **Page 25: [386] Formatted** Windows 用户 5/28/2014 9:46:00 PM

45 No underline, Font color: Auto, English (U.S.)

46  
47 **Page 25: [386] Formatted** Windows 用户 5/28/2014 9:46:00 PM

48 No underline, Font color: Auto, English (U.S.)

49  
50 **Page 25: [387] Formatted** Windows 用户 5/28/2014 9:46:00 PM

51 No underline, Font color: Auto, English (U.S.)

52  
53 **Page 25: [387] Formatted** Windows 用户 5/28/2014 9:46:00 PM

54 No underline, Font color: Auto, English (U.S.)

55  
56 **Page 25: [388] Formatted** Windows 用户 5/28/2014 9:46:00 PM

57 No underline, Font color: Auto, English (U.S.)

58  
59 **Page 25: [388] Formatted** Windows 用户 5/28/2014 9:46:00 PM

60 No underline, Font color: Auto, English (U.S.)

**Page 25: [389] Formatted** Windows 用户 5/28/2014 9:46:00 PM

No underline, Font color: Auto, English (U.S.)

**Page 25: [389] Formatted** Windows 用户 5/28/2014 9:46:00 PM

No underline, Font color: Auto, English (U.S.)

1  
2  
3  
4  
5  
6  
7  
8  
9  
10  
11 **Page 25: [390] Formatted** Windows 用户 5/28/2014 9:46:00 PM

12 No underline, Font color: Auto, English (U.S.)

13  
14 **Page 25: [390] Formatted** Windows 用户 5/28/2014 9:46:00 PM

15 No underline, Font color: Auto, English (U.S.)

16  
17 **Page 25: [391] Formatted** Windows 用户 5/28/2014 9:46:00 PM

18 No underline, Font color: Auto, English (U.S.)

19  
20 **Page 25: [391] Formatted** Windows 用户 5/28/2014 9:46:00 PM

21 No underline, Font color: Auto, English (U.S.)

22  
23 **Page 25: [392] Formatted** Windows 用户 5/28/2014 9:46:00 PM

24 No underline, Font color: Auto, English (U.S.)

25  
26 **Page 25: [392] Formatted** Windows 用户 5/28/2014 9:46:00 PM

27 No underline, Font color: Auto, English (U.S.)

28  
29 **Page 25: [393] Formatted** Windows 用户 5/28/2014 9:46:00 PM

30 No underline, Font color: Auto, English (U.S.)

31  
32 **Page 25: [393] Formatted** Windows 用户 5/28/2014 9:46:00 PM

33 No underline, Font color: Auto, English (U.S.)

34  
35 **Page 25: [394] Formatted** Windows 用户 5/28/2014 9:46:00 PM

36 No underline, Font color: Auto, English (U.S.)

37  
38 **Page 25: [394] Formatted** Windows 用户 5/28/2014 9:46:00 PM

39 No underline, Font color: Auto, English (U.S.)

40  
41 **Page 25: [395] Formatted** Windows 用户 5/28/2014 9:46:00 PM

42 No underline, Font color: Auto, English (U.S.)

43  
44 **Page 25: [395] Formatted** Windows 用户 5/28/2014 9:46:00 PM

45 No underline, Font color: Auto, English (U.S.)

46  
47 **Page 25: [396] Formatted** Windows 用户 5/28/2014 9:46:00 PM

48 No underline, Font color: Auto, English (U.S.)

49  
50 **Page 25: [396] Formatted** Windows 用户 5/28/2014 9:46:00 PM

51 No underline, Font color: Auto, English (U.S.)

52  
53 **Page 25: [397] Formatted** Windows 用户 5/28/2014 9:46:00 PM

54 No underline, Font color: Auto, English (U.S.)

55  
56 **Page 25: [397] Formatted** Windows 用户 5/28/2014 9:46:00 PM

57 No underline, Font color: Auto, English (U.S.)

58  
59 **Page 25: [398] Formatted** Windows 用户 5/28/2014 9:46:00 PM

60 No underline, Font color: Auto, English (U.S.)

**Page 25: [398] Formatted** Windows 用户 5/28/2014 9:46:00 PM

No underline, Font color: Auto, English (U.S.)

**Page 25: [399] Formatted** Windows 用户 5/28/2014 9:46:00 PM

No underline, Font color: Auto, English (U.S.)

1  
2  
3  
4  
5  
6  
7  
8  
9  
10  
11  
12  
13  
14  
15  
16  
17  
18  
19  
20  
21  
22  
23  
24  
25  
26  
27  
28  
29  
30  
31  
32  
33  
34  
35  
36  
37  
38  
39  
40  
41  
42  
43  
44  
45  
46  
47  
48  
49  
50  
51  
52  
53  
54  
55  
56  
57  
58  
59  
60

**Page 25: [399] Formatted** Windows 用户 5/28/2014 9:46:00 PM

No underline, Font color: Auto, English (U.S.)

**Page 25: [400] Formatted** Windows 用户 5/28/2014 9:46:00 PM

No underline, Font color: Auto, English (U.S.)

**Page 25: [400] Formatted** Windows 用户 5/28/2014 9:46:00 PM

No underline, Font color: Auto, English (U.S.)

**Page 25: [401] Formatted** Windows 用户 5/28/2014 9:46:00 PM

No underline, Font color: Auto, English (U.S.)

**Page 25: [401] Formatted** Windows 用户 5/28/2014 9:46:00 PM

No underline, Font color: Auto, English (U.S.)

**Page 25: [402] Formatted** Windows 用户 5/28/2014 9:46:00 PM

No underline, Font color: Auto, English (U.S.)

**Page 25: [402] Formatted** Windows 用户 5/28/2014 9:46:00 PM

No underline, Font color: Auto, English (U.S.)

**Page 25: [403] Formatted** Windows 用户 5/28/2014 9:46:00 PM

No underline, Font color: Auto, English (U.S.)

**Page 25: [403] Formatted** Windows 用户 5/28/2014 9:46:00 PM

No underline, Font color: Auto, English (U.S.)

**Page 25: [404] Formatted** Windows 用户 5/28/2014 9:46:00 PM

No underline, Font color: Auto, English (U.S.)

**Page 25: [404] Formatted** Windows 用户 5/28/2014 9:46:00 PM

No underline, Font color: Auto, English (U.S.)

**Page 25: [405] Formatted** Windows 用户 5/28/2014 9:46:00 PM

No underline, Font color: Auto, English (U.S.)

**Page 25: [405] Formatted** Windows 用户 5/28/2014 9:46:00 PM

No underline, Font color: Auto, English (U.S.)

**Page 25: [406] Formatted** Windows 用户 5/28/2014 9:46:00 PM

No underline, Font color: Auto, English (U.S.)

**Page 25: [406] Formatted** Windows 用户 5/28/2014 9:46:00 PM

No underline, Font color: Auto, English (U.S.)

**Page 25: [407] Formatted** Windows 用户 5/28/2014 9:46:00 PM

No underline, Font color: Auto, English (U.S.)

**Page 25: [407] Formatted** Windows 用户 5/28/2014 9:46:00 PM

No underline, Font color: Auto, English (U.S.)

**Page 25: [408] Formatted** Windows 用户 5/28/2014 9:46:00 PM

No underline, Font color: Auto, English (U.S.)

**Page 25: [408] Formatted** Windows 用户 5/28/2014 9:46:00 PM

No underline, Font color: Auto, English (U.S.)

1  
2  
3  
4  
5  
6  
7  
8  
9  
10  
11 **Page 25: [409] Formatted** Windows 用户 5/28/2014 9:46:00 PM

12 No underline, Font color: Auto, English (U.S.)

13  
14 **Page 25: [409] Formatted** Windows 用户 5/28/2014 9:46:00 PM

15 No underline, Font color: Auto, English (U.S.)

16  
17 **Page 25: [410] Formatted** Windows 用户 5/28/2014 9:46:00 PM

18 No underline, Font color: Auto, English (U.S.)

19  
20 **Page 25: [410] Formatted** Windows 用户 5/28/2014 9:46:00 PM

21 No underline, Font color: Auto, English (U.S.)

22  
23 **Page 25: [411] Formatted** Windows 用户 5/28/2014 9:46:00 PM

24 No underline, Font color: Auto, English (U.S.)

25  
26 **Page 25: [411] Formatted** Windows 用户 5/28/2014 9:46:00 PM

27 No underline, Font color: Auto, English (U.S.)

28  
29 **Page 25: [412] Formatted** Windows 用户 5/28/2014 9:46:00 PM

30 No underline, Font color: Auto, English (U.S.)

31  
32 **Page 25: [412] Formatted** Windows 用户 5/28/2014 9:46:00 PM

33 No underline, Font color: Auto, English (U.S.)

34  
35 **Page 25: [413] Formatted** Windows 用户 5/28/2014 9:46:00 PM

36 No underline, Font color: Auto, English (U.S.)

37  
38 **Page 25: [413] Formatted** Windows 用户 5/28/2014 9:46:00 PM

39 No underline, Font color: Auto, English (U.S.)

40  
41 **Page 25: [414] Formatted** Windows 用户 5/28/2014 9:46:00 PM

42 No underline, Font color: Auto, English (U.S.)

43  
44 **Page 25: [414] Formatted** Windows 用户 5/28/2014 9:46:00 PM

45 No underline, Font color: Auto, English (U.S.)

46  
47 **Page 25: [415] Formatted** Windows 用户 5/28/2014 9:46:00 PM

48 No underline, Font color: Auto, English (U.S.)

49  
50 **Page 25: [415] Formatted** Windows 用户 5/28/2014 9:46:00 PM

51 No underline, Font color: Auto, English (U.S.)

52  
53 **Page 25: [416] Formatted** Windows 用户 5/28/2014 9:46:00 PM

54 No underline, Font color: Auto, English (U.S.)

55  
56 **Page 25: [416] Formatted** Windows 用户 5/28/2014 9:46:00 PM

57 No underline, Font color: Auto, English (U.S.)

58  
59 **Page 25: [417] Formatted** Windows 用户 5/28/2014 9:46:00 PM

60 No underline, Font color: Auto, English (U.S.)

**Page 25: [417] Formatted** Windows 用户 5/28/2014 9:46:00 PM

No underline, Font color: Auto, English (U.S.)

**Page 25: [418] Formatted** Windows 用户 5/28/2014 9:46:00 PM

No underline, Font color: Auto, English (U.S.)

1  
2  
3  
4  
5  
6  
7  
8  
9  
10  
11 **Page 25: [418] Formatted** Windows 用户 5/28/2014 9:46:00 PM

12 No underline, Font color: Auto, English (U.S.)

13  
14 **Page 25: [419] Formatted** Windows 用户 5/28/2014 9:46:00 PM

15 No underline, Font color: Auto, English (U.S.)

16  
17 **Page 25: [419] Formatted** Windows 用户 5/28/2014 9:46:00 PM

18 No underline, Font color: Auto, English (U.S.)

19  
20 **Page 25: [420] Formatted** Windows 用户 5/28/2014 9:46:00 PM

21 No underline, Font color: Auto, English (U.S.)

22  
23 **Page 25: [420] Formatted** Windows 用户 5/28/2014 9:46:00 PM

24 No underline, Font color: Auto, English (U.S.)

25  
26 **Page 25: [421] Formatted** Windows 用户 5/28/2014 9:46:00 PM

27 No underline, Font color: Auto, English (U.S.)

28  
29 **Page 25: [421] Formatted** Windows 用户 5/28/2014 9:46:00 PM

30 No underline, Font color: Auto, English (U.S.)

31  
32 **Page 25: [422] Formatted** Windows 用户 5/28/2014 9:46:00 PM

33 No underline, Font color: Auto, English (U.S.)

34  
35 **Page 25: [422] Formatted** Windows 用户 5/28/2014 9:46:00 PM

36 No underline, Font color: Auto, English (U.S.)

37  
38 **Page 25: [423] Formatted** Windows 用户 5/28/2014 9:46:00 PM

39 No underline, Font color: Auto, English (U.S.)

40  
41 **Page 25: [423] Formatted** Windows 用户 5/28/2014 9:46:00 PM

42 No underline, Font color: Auto, English (U.S.)

43  
44 **Page 25: [424] Formatted** Windows 用户 5/28/2014 9:46:00 PM

45 No underline, Font color: Auto, English (U.S.)

46  
47 **Page 25: [424] Formatted** Windows 用户 5/28/2014 9:46:00 PM

48 No underline, Font color: Auto, English (U.S.)

49  
50 **Page 25: [425] Formatted** Windows 用户 5/28/2014 9:46:00 PM

51 No underline, Font color: Auto, English (U.S.)

52  
53 **Page 25: [425] Formatted** Windows 用户 5/28/2014 9:46:00 PM

54 No underline, Font color: Auto, English (U.S.)

55  
56 **Page 25: [426] Formatted** Windows 用户 5/28/2014 9:46:00 PM

57 No underline, Font color: Auto, English (U.S.)

58  
59 **Page 25: [426] Formatted** Windows 用户 5/28/2014 9:46:00 PM

60 No underline, Font color: Auto, English (U.S.)

**Page 25: [427] Formatted** Windows 用户 5/28/2014 9:46:00 PM

No underline, Font color: Auto, English (U.S.)

**Page 25: [427] Formatted** Windows 用户 5/28/2014 9:46:00 PM

No underline, Font color: Auto, English (U.S.)

1  
2  
3  
4  
5  
6  
7  
8  
9  
10  
11 **Page 25: [428] Formatted** Windows 用户 5/28/2014 9:46:00 PM

12 No underline, Font color: Auto, English (U.S.)

13  
14 **Page 25: [428] Formatted** Windows 用户 5/28/2014 9:46:00 PM

15 No underline, Font color: Auto, English (U.S.)

16  
17 **Page 25: [429] Formatted** Windows 用户 5/28/2014 9:46:00 PM

18 No underline, Font color: Auto, English (U.S.)

19  
20 **Page 25: [429] Formatted** Windows 用户 5/28/2014 9:46:00 PM

21 No underline, Font color: Auto, English (U.S.)

22  
23 **Page 25: [430] Formatted** Windows 用户 5/28/2014 9:46:00 PM

24 No underline, Font color: Auto, English (U.S.)

25  
26 **Page 25: [430] Formatted** Windows 用户 5/28/2014 9:46:00 PM

27 No underline, Font color: Auto, English (U.S.)

28  
29 **Page 25: [431] Formatted** Windows 用户 5/28/2014 9:46:00 PM

30 No underline, Font color: Auto, English (U.S.)

31  
32 **Page 25: [431] Formatted** Windows 用户 5/28/2014 9:46:00 PM

33 No underline, Font color: Auto, English (U.S.)

34  
35 **Page 25: [432] Formatted** Windows 用户 5/28/2014 9:46:00 PM

36 No underline, Font color: Auto, English (U.S.)

37  
38 **Page 25: [432] Formatted** Windows 用户 5/28/2014 9:46:00 PM

39 No underline, Font color: Auto, English (U.S.)

40  
41 **Page 25: [433] Formatted** Windows 用户 5/28/2014 9:46:00 PM

42 No underline, Font color: Auto, English (U.S.)

43  
44 **Page 25: [433] Formatted** Windows 用户 5/28/2014 9:46:00 PM

45 No underline, Font color: Auto, English (U.S.)

46  
47 **Page 25: [434] Formatted** Windows 用户 5/28/2014 9:46:00 PM

48 No underline, Font color: Auto, English (U.S.)

49  
50 **Page 25: [434] Formatted** Windows 用户 5/28/2014 9:46:00 PM

51 No underline, Font color: Auto, English (U.S.)

52  
53 **Page 25: [435] Formatted** Windows 用户 5/28/2014 9:46:00 PM

54 No underline, Font color: Auto, English (U.S.)

55  
56 **Page 25: [435] Formatted** Windows 用户 5/28/2014 9:46:00 PM

57 No underline, Font color: Auto, English (U.S.)

58  
59 **Page 25: [436] Formatted** Windows 用户 5/28/2014 9:46:00 PM

60 No underline, Font color: Auto, English (U.S.)

**Page 25: [436] Formatted** Windows 用户 5/28/2014 9:46:00 PM

No underline, Font color: Auto, English (U.S.)

**Page 25: [437] Formatted** Windows 用户 5/28/2014 9:46:00 PM

No underline, Font color: Auto, English (U.S.)



1  
2  
3  
4  
5  
6  
7  
8  
9  
10  
11 **Page 25: [437] Formatted** Windows 用户 5/28/2014 9:46:00 PM

12 No underline, Font color: Auto, English (U.S.)

13  
14 **Page 25: [438] Formatted** Windows 用户 5/28/2014 9:46:00 PM

15 No underline, Font color: Auto, English (U.S.)

16  
17 **Page 25: [438] Formatted** Windows 用户 5/28/2014 9:46:00 PM

18 No underline, Font color: Auto, English (U.S.)

19  
20 **Page 25: [439] Formatted** Windows 用户 5/28/2014 9:46:00 PM

21 No underline, Font color: Auto, English (U.S.)

22  
23 **Page 25: [439] Formatted** Windows 用户 5/28/2014 9:46:00 PM

24 No underline, Font color: Auto, English (U.S.)

25  
26 **Page 25: [440] Formatted** Windows 用户 5/28/2014 9:46:00 PM

27 No underline, Font color: Auto, English (U.S.)

28  
29 **Page 25: [440] Formatted** Windows 用户 5/28/2014 9:46:00 PM

30 No underline, Font color: Auto, English (U.S.)

31  
32 **Page 25: [441] Formatted** Windows 用户 5/28/2014 9:46:00 PM

33 No underline, Font color: Auto, English (U.S.)

34  
35 **Page 25: [441] Formatted** Windows 用户 5/28/2014 9:46:00 PM

36 No underline, Font color: Auto, English (U.S.)

37  
38 **Page 25: [442] Formatted** Windows 用户 5/28/2014 9:46:00 PM

39 No underline, Font color: Auto, English (U.S.)

40  
41 **Page 25: [442] Formatted** Windows 用户 5/28/2014 9:46:00 PM

42 No underline, Font color: Auto, English (U.S.)

43  
44 **Page 25: [443] Formatted** Windows 用户 5/28/2014 9:46:00 PM

45 No underline, Font color: Auto, English (U.S.)

46  
47 **Page 25: [443] Formatted** Windows 用户 5/28/2014 9:46:00 PM

48 No underline, Font color: Auto, English (U.S.)

49  
50 **Page 25: [444] Formatted** Windows 用户 5/28/2014 9:46:00 PM

51 No underline, Font color: Auto, English (U.S.)

52  
53 **Page 25: [444] Formatted** Windows 用户 5/28/2014 9:46:00 PM

54 No underline, Font color: Auto, English (U.S.)

55  
56 **Page 25: [445] Formatted** Windows 用户 5/28/2014 9:46:00 PM

57 No underline, Font color: Auto, English (U.S.)

58  
59 **Page 25: [445] Formatted** Windows 用户 5/28/2014 9:46:00 PM

60 No underline, Font color: Auto, English (U.S.)

**Page 25: [446] Formatted** Windows 用户 5/28/2014 9:46:00 PM

No underline, Font color: Auto, English (U.S.)

**Page 25: [446] Formatted** Windows 用户 5/28/2014 9:46:00 PM

No underline, Font color: Auto, English (U.S.)



1  
2  
3  
4  
5  
6  
7  
8  
9  
10  
11 **Page 25: [447] Formatted** Windows 用户 5/28/2014 9:46:00 PM

12 No underline, Font color: Auto, English (U.S.)

13  
14 **Page 25: [447] Formatted** Windows 用户 5/28/2014 9:46:00 PM

15 No underline, Font color: Auto, English (U.S.)

16  
17 **Page 25: [448] Formatted** Windows 用户 5/28/2014 9:46:00 PM

18 No underline, Font color: Auto, English (U.S.)

19  
20 **Page 25: [448] Formatted** Windows 用户 5/28/2014 9:46:00 PM

21 No underline, Font color: Auto, English (U.S.)

22  
23 **Page 25: [449] Formatted** Windows 用户 5/28/2014 9:46:00 PM

24 No underline, Font color: Auto, English (U.S.)

25  
26 **Page 25: [449] Formatted** Windows 用户 5/28/2014 9:46:00 PM

27 No underline, Font color: Auto, English (U.S.)

28  
29 **Page 25: [450] Formatted** Windows 用户 5/28/2014 9:46:00 PM

30 No underline, Font color: Auto, English (U.S.)

31  
32 **Page 25: [450] Formatted** Windows 用户 5/28/2014 9:46:00 PM

33 No underline, Font color: Auto, English (U.S.)

34  
35 **Page 25: [451] Formatted** Windows 用户 5/28/2014 9:46:00 PM

36 No underline, Font color: Auto, English (U.S.)

37  
38 **Page 25: [451] Formatted** Windows 用户 5/28/2014 9:46:00 PM

39 No underline, Font color: Auto, English (U.S.)

40  
41 **Page 25: [452] Formatted** Windows 用户 5/28/2014 9:46:00 PM

42 No underline, Font color: Auto, English (U.S.)

43  
44 **Page 25: [452] Formatted** Windows 用户 5/28/2014 9:46:00 PM

45 No underline, Font color: Auto, English (U.S.)

46  
47 **Page 25: [453] Formatted** Windows 用户 5/28/2014 9:46:00 PM

48 No underline, Font color: Auto, English (U.S.)

49  
50 **Page 25: [453] Formatted** Windows 用户 5/28/2014 9:46:00 PM

51 No underline, Font color: Auto, English (U.S.)

52  
53 **Page 25: [454] Formatted** Windows 用户 5/28/2014 9:46:00 PM

54 No underline, Font color: Auto, English (U.S.)

55  
56 **Page 25: [454] Formatted** Windows 用户 5/28/2014 9:46:00 PM

57 No underline, Font color: Auto, English (U.S.)

58  
59 **Page 25: [455] Formatted** Windows 用户 5/28/2014 9:46:00 PM

60 No underline, Font color: Auto, English (U.S.)

**Page 25: [455] Formatted** Windows 用户 5/28/2014 9:46:00 PM

No underline, Font color: Auto, English (U.S.)

**Page 25: [456] Formatted** Windows 用户 5/28/2014 9:46:00 PM

No underline, Font color: Auto, English (U.S.)

1  
2  
3  
4  
5  
6  
7  
8  
9  
10  
11  
12  
13  
14  
15  
16  
17  
18  
19  
20  
21  
22  
23  
24  
25  
26  
27  
28  
29  
30  
31  
32  
33  
34  
35  
36  
37  
38  
39  
40  
41  
42  
43  
44  
45  
46  
47  
48  
49  
50  
51  
52  
53  
54  
55  
56  
57  
58  
59  
60

**Page 25: [456] Formatted** Windows 用户 5/28/2014 9:46:00 PM

No underline, Font color: Auto, English (U.S.)

**Page 25: [457] Formatted** Windows 用户 5/28/2014 9:46:00 PM

No underline, Font color: Auto, English (U.S.)

**Page 25: [457] Formatted** Windows 用户 5/28/2014 9:46:00 PM

No underline, Font color: Auto, English (U.S.)

**Page 25: [458] Formatted** Windows 用户 5/28/2014 9:46:00 PM

No underline, Font color: Auto, English (U.S.)

**Page 25: [458] Formatted** Windows 用户 5/28/2014 9:46:00 PM

No underline, Font color: Auto, English (U.S.)

**Page 25: [459] Formatted** Windows 用户 5/28/2014 9:46:00 PM

No underline, Font color: Auto, English (U.S.)

**Page 25: [459] Formatted** Windows 用户 5/28/2014 9:46:00 PM

No underline, Font color: Auto, English (U.S.)

**Page 25: [460] Formatted** Windows 用户 5/28/2014 9:46:00 PM

No underline, Font color: Auto, English (U.S.)

**Page 25: [460] Formatted** Windows 用户 5/28/2014 9:46:00 PM

No underline, Font color: Auto, English (U.S.)

**Page 25: [461] Formatted** Windows 用户 5/28/2014 9:46:00 PM

No underline, Font color: Auto, English (U.S.)

**Page 25: [461] Formatted** Windows 用户 5/28/2014 9:46:00 PM

No underline, Font color: Auto, English (U.S.)

**Page 25: [462] Formatted** Windows 用户 5/28/2014 9:46:00 PM

No underline, Font color: Auto, English (U.S.)

**Page 25: [462] Formatted** Windows 用户 5/28/2014 9:46:00 PM

No underline, Font color: Auto, English (U.S.)

**Page 25: [463] Formatted** Windows 用户 5/28/2014 9:46:00 PM

No underline, Font color: Auto, English (U.S.)

**Page 25: [463] Formatted** Windows 用户 5/28/2014 9:46:00 PM

No underline, Font color: Auto, English (U.S.)

**Page 25: [464] Formatted** Windows 用户 5/28/2014 9:46:00 PM

No underline, Font color: Auto, English (U.S.)

**Page 25: [464] Formatted** Windows 用户 5/28/2014 9:46:00 PM

No underline, Font color: Auto, English (U.S.)

**Page 25: [465] Formatted** Windows 用户 5/28/2014 9:46:00 PM

No underline, Font color: Auto, English (U.S.)

**Page 25: [465] Formatted** Windows 用户 5/28/2014 9:46:00 PM

No underline, Font color: Auto, English (U.S.)

1  
2  
3  
4  
5  
6  
7  
8  
9  
10  
11 **Page 25: [466] Formatted** Windows 用户 5/28/2014 9:46:00 PM

12 No underline, Font color: Auto, English (U.S.)

13  
14 **Page 25: [466] Formatted** Windows 用户 5/28/2014 9:46:00 PM

15 No underline, Font color: Auto, English (U.S.)

16  
17 **Page 25: [467] Formatted** Windows 用户 5/28/2014 9:46:00 PM

18 No underline, Font color: Auto, English (U.S.)

19  
20 **Page 25: [467] Formatted** Windows 用户 5/28/2014 9:46:00 PM

21 No underline, Font color: Auto, English (U.S.)

22  
23 **Page 25: [468] Formatted** Windows 用户 5/28/2014 9:46:00 PM

24 No underline, Font color: Auto, English (U.S.)

25  
26 **Page 25: [468] Formatted** Windows 用户 5/28/2014 9:46:00 PM

27 No underline, Font color: Auto, English (U.S.)

28  
29 **Page 25: [469] Formatted** Windows 用户 5/28/2014 9:46:00 PM

30 No underline, Font color: Auto, English (U.S.)

31  
32 **Page 25: [469] Formatted** Windows 用户 5/28/2014 9:46:00 PM

33 No underline, Font color: Auto, English (U.S.)

34  
35 **Page 25: [470] Formatted** Windows 用户 5/28/2014 9:46:00 PM

36 No underline, Font color: Auto, English (U.S.)

37  
38 **Page 25: [470] Formatted** Windows 用户 5/28/2014 9:46:00 PM

39 No underline, Font color: Auto, English (U.S.)

40  
41 **Page 25: [471] Formatted** Windows 用户 5/28/2014 9:46:00 PM

42 No underline, Font color: Auto, English (U.S.)

43  
44 **Page 25: [471] Formatted** Windows 用户 5/28/2014 9:46:00 PM

45 No underline, Font color: Auto, English (U.S.)

46  
47 **Page 25: [472] Formatted** Windows 用户 5/28/2014 9:46:00 PM

48 No underline, Font color: Auto, English (U.S.)

49  
50 **Page 25: [472] Formatted** Windows 用户 5/28/2014 9:46:00 PM

51 No underline, Font color: Auto, English (U.S.)

52  
53 **Page 25: [473] Formatted** Windows 用户 5/28/2014 9:46:00 PM

54 No underline, Font color: Auto, English (U.S.)

55  
56 **Page 25: [473] Formatted** Windows 用户 5/28/2014 9:46:00 PM

57 No underline, Font color: Auto, English (U.S.)

58  
59 **Page 25: [474] Formatted** Windows 用户 5/28/2014 9:46:00 PM

60 No underline, Font color: Auto, English (U.S.)

**Page 25: [474] Formatted** Windows 用户 5/28/2014 9:46:00 PM

No underline, Font color: Auto, English (U.S.)

**Page 25: [475] Formatted** Windows 用户 5/28/2014 9:46:00 PM

No underline, Font color: Auto, English (U.S.)

1  
2  
3  
4  
5  
6  
7  
8  
9  
10  
11  
12  
13  
14  
15  
16  
17  
18  
19  
20  
21  
22  
23  
24  
25  
26  
27  
28  
29  
30  
31  
32  
33  
34  
35  
36  
37  
38  
39  
40  
41  
42  
43  
44  
45  
46  
47  
48  
49  
50  
51  
52  
53  
54  
55  
56  
57  
58  
59  
60

**Page 25: [475] Formatted** Windows 用户 5/28/2014 9:46:00 PM

No underline, Font color: Auto, English (U.S.)

**Page 25: [476] Formatted** Windows 用户 5/28/2014 9:46:00 PM

No underline, Font color: Auto, English (U.S.)

**Page 25: [476] Formatted** Windows 用户 5/28/2014 9:46:00 PM

No underline, Font color: Auto, English (U.S.)

**Page 25: [477] Formatted** Windows 用户 5/28/2014 9:46:00 PM

No underline, Font color: Auto, English (U.S.)

**Page 25: [477] Formatted** Windows 用户 5/28/2014 9:46:00 PM

No underline, Font color: Auto, English (U.S.)

**Page 25: [478] Formatted** Windows 用户 5/28/2014 9:46:00 PM

No underline, Font color: Auto, English (U.S.)

**Page 25: [478] Formatted** Windows 用户 5/28/2014 9:46:00 PM

No underline, Font color: Auto, English (U.S.)

**Page 25: [479] Formatted** Windows 用户 5/28/2014 9:46:00 PM

No underline, Font color: Auto, English (U.S.)

**Page 25: [479] Formatted** Windows 用户 5/28/2014 9:46:00 PM

No underline, Font color: Auto, English (U.S.)

**Page 25: [480] Formatted** Windows 用户 5/28/2014 9:46:00 PM

No underline, Font color: Auto, English (U.S.)

**Page 25: [480] Formatted** Windows 用户 5/28/2014 9:46:00 PM

No underline, Font color: Auto, English (U.S.)

**Page 25: [481] Formatted** Windows 用户 5/28/2014 9:46:00 PM

No underline, Font color: Auto, English (U.S.)

**Page 25: [481] Formatted** Windows 用户 5/28/2014 9:46:00 PM

No underline, Font color: Auto, English (U.S.)

**Page 25: [482] Formatted** Windows 用户 5/28/2014 9:46:00 PM

No underline, Font color: Auto, English (U.S.)

**Page 25: [482] Formatted** Windows 用户 5/28/2014 9:46:00 PM

No underline, Font color: Auto, English (U.S.)

**Page 25: [483] Formatted** Windows 用户 5/28/2014 9:46:00 PM

No underline, Font color: Auto, English (U.S.)

**Page 25: [483] Formatted** Windows 用户 5/28/2014 9:46:00 PM

No underline, Font color: Auto, English (U.S.)

**Page 25: [484] Formatted** Windows 用户 5/28/2014 9:46:00 PM

No underline, Font color: Auto, English (U.S.)

**Page 25: [484] Formatted** Windows 用户 5/28/2014 9:46:00 PM

No underline, Font color: Auto, English (U.S.)

1  
2  
3  
4  
5  
6  
7  
8  
9  
10  
11 **Page 25: [485] Formatted** Windows 用户 5/28/2014 9:46:00 PM

12 No underline, Font color: Auto, English (U.S.)

13  
14 **Page 25: [485] Formatted** Windows 用户 5/28/2014 9:46:00 PM

15 No underline, Font color: Auto, English (U.S.)

16  
17 **Page 25: [486] Formatted** Windows 用户 5/28/2014 9:46:00 PM

18 No underline, Font color: Auto, English (U.S.)

19  
20 **Page 25: [486] Formatted** Windows 用户 5/28/2014 9:46:00 PM

21 No underline, Font color: Auto, English (U.S.)

22  
23 **Page 25: [487] Formatted** Windows 用户 5/28/2014 9:46:00 PM

24 No underline, Font color: Auto, English (U.S.)

25  
26 **Page 25: [487] Formatted** Windows 用户 5/28/2014 9:46:00 PM

27 No underline, Font color: Auto, English (U.S.)

28  
29 **Page 25: [488] Formatted** Windows 用户 5/28/2014 9:46:00 PM

30 No underline, Font color: Auto, English (U.S.)

31  
32 **Page 25: [488] Formatted** Windows 用户 5/28/2014 9:46:00 PM

33 No underline, Font color: Auto, English (U.S.)

34  
35 **Page 25: [489] Formatted** Windows 用户 5/28/2014 9:46:00 PM

36 No underline, Font color: Auto, English (U.S.)

37  
38 **Page 25: [489] Formatted** Windows 用户 5/28/2014 9:46:00 PM

39 No underline, Font color: Auto, English (U.S.)

40  
41 **Page 25: [490] Formatted** Windows 用户 5/28/2014 9:46:00 PM

42 No underline, Font color: Auto, English (U.S.)

43  
44 **Page 25: [490] Formatted** Windows 用户 5/28/2014 9:46:00 PM

45 No underline, Font color: Auto, English (U.S.)

46  
47 **Page 25: [491] Formatted** Windows 用户 5/28/2014 9:46:00 PM

48 No underline, Font color: Auto, English (U.S.)

49  
50 **Page 25: [491] Formatted** Windows 用户 5/28/2014 9:46:00 PM

51 No underline, Font color: Auto, English (U.S.)

52  
53 **Page 25: [492] Formatted** Windows 用户 5/28/2014 9:46:00 PM

54 No underline, Font color: Auto, English (U.S.)

55  
56 **Page 25: [492] Formatted** Windows 用户 5/28/2014 9:46:00 PM

57 No underline, Font color: Auto, English (U.S.)

58  
59 **Page 25: [493] Formatted** Windows 用户 5/28/2014 9:46:00 PM

60 No underline, Font color: Auto, English (U.S.)

**Page 25: [493] Formatted** Windows 用户 5/28/2014 9:46:00 PM

No underline, Font color: Auto, English (U.S.)

**Page 25: [494] Formatted** Windows 用户 5/28/2014 9:46:00 PM

No underline, Font color: Auto, English (U.S.)

1  
2  
3  
4  
5  
6  
7  
8  
9  
10  
11 **Page 25: [494] Formatted** Windows 用户 5/28/2014 9:46:00 PM

12 No underline, Font color: Auto, English (U.S.)

13  
14 **Page 25: [495] Formatted** Windows 用户 5/28/2014 9:46:00 PM

15 No underline, Font color: Auto, English (U.S.)

16  
17 **Page 25: [495] Formatted** Windows 用户 5/28/2014 9:46:00 PM

18 No underline, Font color: Auto, English (U.S.)

19  
20 **Page 25: [496] Formatted** Windows 用户 5/28/2014 9:46:00 PM

21 No underline, Font color: Auto, English (U.S.)

22  
23 **Page 25: [496] Formatted** Windows 用户 5/28/2014 9:46:00 PM

24 No underline, Font color: Auto, English (U.S.)

25  
26 **Page 25: [497] Formatted** Windows 用户 5/28/2014 9:46:00 PM

27 No underline, Font color: Auto, English (U.S.)

28  
29 **Page 25: [497] Formatted** Windows 用户 5/28/2014 9:46:00 PM

30 No underline, Font color: Auto, English (U.S.)

31  
32 **Page 25: [498] Formatted** Windows 用户 5/28/2014 9:46:00 PM

33 No underline, Font color: Auto, English (U.S.)

34  
35 **Page 25: [498] Formatted** Windows 用户 5/28/2014 9:46:00 PM

36 No underline, Font color: Auto, English (U.S.)

37  
38 **Page 25: [499] Formatted** Windows 用户 5/28/2014 9:46:00 PM

39 No underline, Font color: Auto, English (U.S.)

40  
41 **Page 25: [499] Formatted** Windows 用户 5/28/2014 9:46:00 PM

42 No underline, Font color: Auto, English (U.S.)

43  
44 **Page 25: [500] Formatted** Windows 用户 5/28/2014 9:46:00 PM

45 No underline, Font color: Auto, English (U.S.)

46  
47 **Page 25: [500] Formatted** Windows 用户 5/28/2014 9:46:00 PM

48 No underline, Font color: Auto, English (U.S.)

49  
50 **Page 25: [501] Formatted** Windows 用户 5/28/2014 9:46:00 PM

51 No underline, Font color: Auto, English (U.S.)

52  
53 **Page 25: [501] Formatted** Windows 用户 5/28/2014 9:46:00 PM

54 No underline, Font color: Auto, English (U.S.)

55  
56 **Page 25: [502] Formatted** Windows 用户 5/28/2014 9:46:00 PM

57 No underline, Font color: Auto, English (U.S.)

58  
59 **Page 25: [502] Formatted** Windows 用户 5/28/2014 9:46:00 PM

60 No underline, Font color: Auto, English (U.S.)

**Page 25: [503] Formatted** Windows 用户 5/28/2014 9:46:00 PM

No underline, Font color: Auto, English (U.S.)

**Page 25: [503] Formatted** Windows 用户 5/28/2014 9:46:00 PM

No underline, Font color: Auto, English (U.S.)

1  
2  
3  
4  
5  
6  
7  
8  
9  
10  
11 **Page 25: [504] Formatted** Windows 用户 5/28/2014 9:46:00 PM

12 No underline, Font color: Auto, English (U.S.)

13  
14 **Page 25: [504] Formatted** Windows 用户 5/28/2014 9:46:00 PM

15 No underline, Font color: Auto, English (U.S.)

16  
17 **Page 25: [505] Formatted** Windows 用户 5/28/2014 9:46:00 PM

18 No underline, Font color: Auto, English (U.S.)

19  
20 **Page 25: [505] Formatted** Windows 用户 5/28/2014 9:46:00 PM

21 No underline, Font color: Auto, English (U.S.)

22  
23 **Page 25: [506] Formatted** Windows 用户 5/28/2014 9:46:00 PM

24 No underline, Font color: Auto, English (U.S.)

25  
26 **Page 25: [506] Formatted** Windows 用户 5/28/2014 9:46:00 PM

27 No underline, Font color: Auto, English (U.S.)

28  
29 **Page 25: [507] Formatted** Windows 用户 5/28/2014 9:46:00 PM

30 No underline, Font color: Auto, English (U.S.)

31  
32 **Page 25: [507] Formatted** Windows 用户 5/28/2014 9:46:00 PM

33 No underline, Font color: Auto, English (U.S.)

34  
35 **Page 25: [508] Formatted** Windows 用户 5/28/2014 9:46:00 PM

36 No underline, Font color: Auto, English (U.S.)

37  
38 **Page 25: [508] Formatted** Windows 用户 5/28/2014 9:46:00 PM

39 No underline, Font color: Auto, English (U.S.)

40  
41 **Page 25: [509] Formatted** Windows 用户 5/28/2014 9:46:00 PM

42 No underline, Font color: Auto, English (U.S.)

43  
44 **Page 25: [509] Formatted** Windows 用户 5/28/2014 9:46:00 PM

45 No underline, Font color: Auto, English (U.S.)

46  
47 **Page 25: [510] Formatted** Windows 用户 5/28/2014 9:46:00 PM

48 No underline, Font color: Auto, English (U.S.)

49  
50 **Page 25: [510] Formatted** Windows 用户 5/28/2014 9:46:00 PM

51 No underline, Font color: Auto, English (U.S.)

52  
53 **Page 25: [511] Formatted** Windows 用户 5/28/2014 9:46:00 PM

54 No underline, Font color: Auto, English (U.S.)

55  
56 **Page 25: [511] Formatted** Windows 用户 5/28/2014 9:46:00 PM

57 No underline, Font color: Auto, English (U.S.)

58  
59 **Page 25: [512] Formatted** Windows 用户 5/28/2014 9:46:00 PM

60 No underline, Font color: Auto, English (U.S.)

**Page 25: [512] Formatted** Windows 用户 5/28/2014 9:46:00 PM

No underline, Font color: Auto, English (U.S.)

**Page 25: [513] Formatted** Windows 用户 5/28/2014 9:46:00 PM

No underline, Font color: Auto, English (U.S.)



1  
2  
3  
4  
5  
6  
7  
8  
9  
10  
11 **Page 25: [513] Formatted** Windows 用户 5/28/2014 9:46:00 PM

12 No underline, Font color: Auto, English (U.S.)

13  
14 **Page 25: [514] Formatted** Windows 用户 5/28/2014 9:46:00 PM

15 No underline, Font color: Auto, English (U.S.)

16  
17 **Page 25: [514] Formatted** Windows 用户 5/28/2014 9:46:00 PM

18 No underline, Font color: Auto, English (U.S.)

19  
20 **Page 25: [515] Formatted** Windows 用户 5/28/2014 9:46:00 PM

21 No underline, Font color: Auto, English (U.S.)

22  
23 **Page 25: [515] Formatted** Windows 用户 5/28/2014 9:46:00 PM

24 No underline, Font color: Auto, English (U.S.)

25  
26 **Page 25: [516] Formatted** Windows 用户 5/28/2014 9:46:00 PM

27 No underline, Font color: Auto, English (U.S.)

28  
29 **Page 25: [516] Formatted** Windows 用户 5/28/2014 9:46:00 PM

30 No underline, Font color: Auto, English (U.S.)

31  
32 **Page 25: [517] Formatted** Windows 用户 5/28/2014 9:46:00 PM

33 No underline, Font color: Auto, English (U.S.)

34  
35 **Page 25: [517] Formatted** Windows 用户 5/28/2014 9:46:00 PM

36 No underline, Font color: Auto, English (U.S.)

37  
38 **Page 25: [518] Formatted** Windows 用户 5/28/2014 9:46:00 PM

39 No underline, Font color: Auto, English (U.S.)

40  
41 **Page 25: [518] Formatted** Windows 用户 5/28/2014 9:46:00 PM

42 No underline, Font color: Auto, English (U.S.)

43  
44 **Page 25: [519] Formatted** Windows 用户 5/28/2014 9:46:00 PM

45 No underline, Font color: Auto, English (U.S.)

46  
47 **Page 25: [519] Formatted** Windows 用户 5/28/2014 9:46:00 PM

48 No underline, Font color: Auto, English (U.S.)

49  
50 **Page 25: [520] Formatted** Windows 用户 5/28/2014 9:46:00 PM

51 No underline, Font color: Auto, English (U.S.)

52  
53 **Page 25: [520] Formatted** Windows 用户 5/28/2014 9:46:00 PM

54 No underline, Font color: Auto, English (U.S.)

55  
56 **Page 25: [521] Formatted** Windows 用户 5/28/2014 9:46:00 PM

57 No underline, Font color: Auto, English (U.S.)

58  
59 **Page 25: [521] Formatted** Windows 用户 5/28/2014 9:46:00 PM

60 No underline, Font color: Auto, English (U.S.)

**Page 25: [522] Formatted** Windows 用户 5/28/2014 9:46:00 PM

No underline, Font color: Auto, English (U.S.)

**Page 25: [522] Formatted** Windows 用户 5/28/2014 9:46:00 PM

No underline, Font color: Auto, English (U.S.)



1  
2  
3  
4  
5  
6  
7  
8  
9  
10  
11 **Page 25: [523] Formatted** Windows 用户 5/28/2014 9:46:00 PM

12 No underline, Font color: Auto, English (U.S.)

13  
14 **Page 25: [523] Formatted** Windows 用户 5/28/2014 9:46:00 PM

15 No underline, Font color: Auto, English (U.S.)

16  
17 **Page 25: [524] Formatted** Windows 用户 5/28/2014 9:46:00 PM

18 No underline, Font color: Auto, English (U.S.)

19  
20 **Page 25: [524] Formatted** Windows 用户 5/28/2014 9:46:00 PM

21 No underline, Font color: Auto, English (U.S.)

22  
23 **Page 25: [525] Formatted** Windows 用户 5/28/2014 9:46:00 PM

24 No underline, Font color: Auto, English (U.S.)

25  
26 **Page 25: [525] Formatted** Windows 用户 5/28/2014 9:46:00 PM

27 No underline, Font color: Auto, English (U.S.)

28  
29 **Page 25: [526] Formatted** Windows 用户 5/28/2014 9:46:00 PM

30 No underline, Font color: Auto, English (U.S.)

31  
32 **Page 25: [526] Formatted** Windows 用户 5/28/2014 9:46:00 PM

33 No underline, Font color: Auto, English (U.S.)

34  
35 **Page 25: [527] Formatted** Windows 用户 5/28/2014 9:46:00 PM

36 No underline, Font color: Auto, English (U.S.)

37  
38 **Page 25: [527] Formatted** Windows 用户 5/28/2014 9:46:00 PM

39 No underline, Font color: Auto, English (U.S.)

40  
41 **Page 25: [528] Formatted** Windows 用户 5/28/2014 9:46:00 PM

42 No underline, Font color: Auto, English (U.S.)

43  
44 **Page 25: [528] Formatted** Windows 用户 5/28/2014 9:46:00 PM

45 No underline, Font color: Auto, English (U.S.)

46  
47 **Page 25: [529] Formatted** Windows 用户 5/28/2014 9:46:00 PM

48 No underline, Font color: Auto, English (U.S.)

49  
50 **Page 25: [529] Formatted** Windows 用户 5/28/2014 9:46:00 PM

51 No underline, Font color: Auto, English (U.S.)

52  
53 **Page 25: [530] Formatted** Windows 用户 5/28/2014 9:46:00 PM

54 No underline, Font color: Auto, English (U.S.)

55  
56 **Page 25: [530] Formatted** Windows 用户 5/28/2014 9:46:00 PM

57 No underline, Font color: Auto, English (U.S.)

58  
59 **Page 25: [531] Formatted** Windows 用户 5/28/2014 9:46:00 PM

60 No underline, Font color: Auto, English (U.S.)

**Page 25: [531] Formatted** Windows 用户 5/28/2014 9:46:00 PM

No underline, Font color: Auto, English (U.S.)

**Page 25: [532] Formatted** Windows 用户 5/28/2014 9:46:00 PM

No underline, Font color: Auto, English (U.S.)

1  
2  
3  
4  
5  
6  
7  
8  
9  
10  
11 **Page 25: [532] Formatted** Windows 用户 5/28/2014 9:46:00 PM

12 No underline, Font color: Auto, English (U.S.)

13  
14 **Page 25: [533] Formatted** Windows 用户 5/28/2014 9:46:00 PM

15 No underline, Font color: Auto, English (U.S.)

16  
17 **Page 25: [533] Formatted** Windows 用户 5/28/2014 9:46:00 PM

18 No underline, Font color: Auto, English (U.S.)

19  
20 **Page 25: [534] Formatted** Windows 用户 5/28/2014 9:46:00 PM

21 No underline, Font color: Auto, English (U.S.)

22  
23 **Page 25: [534] Formatted** Windows 用户 5/28/2014 9:46:00 PM

24 No underline, Font color: Auto, English (U.S.)

25  
26 **Page 25: [535] Formatted** Windows 用户 5/28/2014 9:46:00 PM

27 No underline, Font color: Auto, English (U.S.)

28  
29 **Page 25: [535] Formatted** Windows 用户 5/28/2014 9:46:00 PM

30 No underline, Font color: Auto, English (U.S.)

31  
32 **Page 25: [536] Formatted** Windows 用户 5/28/2014 9:46:00 PM

33 No underline, Font color: Auto, English (U.S.)

34  
35 **Page 25: [536] Formatted** Windows 用户 5/28/2014 9:46:00 PM

36 No underline, Font color: Auto, English (U.S.)

37  
38 **Page 25: [537] Formatted** Windows 用户 5/28/2014 9:46:00 PM

39 No underline, Font color: Auto, English (U.S.)

40  
41 **Page 25: [537] Formatted** Windows 用户 5/28/2014 9:46:00 PM

42 No underline, Font color: Auto, English (U.S.)

43  
44 **Page 25: [538] Formatted** Windows 用户 5/28/2014 9:46:00 PM

45 No underline, Font color: Auto, English (U.S.)

46  
47 **Page 25: [538] Formatted** Windows 用户 5/28/2014 9:46:00 PM

48 No underline, Font color: Auto, English (U.S.)

49  
50 **Page 25: [539] Formatted** Windows 用户 5/28/2014 9:46:00 PM

51 No underline, Font color: Auto, English (U.S.)

52  
53 **Page 25: [539] Formatted** Windows 用户 5/28/2014 9:46:00 PM

54 No underline, Font color: Auto, English (U.S.)

55  
56 **Page 25: [540] Formatted** Windows 用户 5/28/2014 9:46:00 PM

57 No underline, Font color: Auto, English (U.S.)

58  
59 **Page 25: [540] Formatted** Windows 用户 5/28/2014 9:46:00 PM

60 No underline, Font color: Auto, English (U.S.)

**Page 25: [541] Formatted** Windows 用户 5/28/2014 9:46:00 PM

No underline, Font color: Auto, English (U.S.)

**Page 25: [541] Formatted** Windows 用户 5/28/2014 9:46:00 PM

No underline, Font color: Auto, English (U.S.)

1  
2  
3  
4  
5  
6  
7  
8  
9  
10  
11 **Page 25: [542] Formatted** Windows 用户 5/28/2014 9:46:00 PM

12 No underline, Font color: Auto, English (U.S.)

13  
14 **Page 25: [542] Formatted** Windows 用户 5/28/2014 9:46:00 PM

15 No underline, Font color: Auto, English (U.S.)

16  
17 **Page 25: [543] Formatted** Windows 用户 5/28/2014 9:46:00 PM

18 No underline, Font color: Auto, English (U.S.)

19  
20 **Page 25: [543] Formatted** Windows 用户 5/28/2014 9:46:00 PM

21 No underline, Font color: Auto, English (U.S.)

22  
23 **Page 25: [544] Formatted** Windows 用户 5/28/2014 9:46:00 PM

24 No underline, Font color: Auto, English (U.S.)

25  
26 **Page 25: [544] Formatted** Windows 用户 5/28/2014 9:46:00 PM

27 No underline, Font color: Auto, English (U.S.)

28  
29 **Page 25: [545] Formatted** Windows 用户 5/28/2014 9:46:00 PM

30 No underline, Font color: Auto, English (U.S.)

31  
32 **Page 25: [545] Formatted** Windows 用户 5/28/2014 9:46:00 PM

33 No underline, Font color: Auto, English (U.S.)

34  
35 **Page 25: [546] Formatted** Windows 用户 5/28/2014 9:46:00 PM

36 No underline, Font color: Auto, English (U.S.)

37  
38 **Page 25: [546] Formatted** Windows 用户 5/28/2014 9:46:00 PM

39 No underline, Font color: Auto, English (U.S.)

40  
41 **Page 25: [547] Formatted** Windows 用户 5/28/2014 9:46:00 PM

42 No underline, Font color: Auto, English (U.S.)

43  
44 **Page 25: [547] Formatted** Windows 用户 5/28/2014 9:46:00 PM

45 No underline, Font color: Auto, English (U.S.)

46  
47 **Page 25: [548] Formatted** Windows 用户 5/28/2014 9:46:00 PM

48 No underline, Font color: Auto, English (U.S.)

49  
50 **Page 25: [548] Formatted** Windows 用户 5/28/2014 9:46:00 PM

51 No underline, Font color: Auto, English (U.S.)

52  
53 **Page 25: [549] Formatted** Windows 用户 5/28/2014 9:46:00 PM

54 No underline, Font color: Auto, English (U.S.)

55  
56 **Page 25: [549] Formatted** Windows 用户 5/28/2014 9:46:00 PM

57 No underline, Font color: Auto, English (U.S.)

58  
59 **Page 25: [550] Formatted** Windows 用户 5/28/2014 9:46:00 PM

60 No underline, Font color: Auto, English (U.S.)

**Page 25: [550] Formatted** Windows 用户 5/28/2014 9:46:00 PM

No underline, Font color: Auto, English (U.S.)

**Page 25: [551] Formatted** Windows 用户 5/28/2014 9:46:00 PM

No underline, Font color: Auto, English (U.S.)

1  
2  
3  
4  
5  
6  
7  
8  
9  
10  
11 **Page 25: [551] Formatted** Windows 用户 5/28/2014 9:46:00 PM

12 No underline, Font color: Auto, English (U.S.)

13  
14 **Page 25: [552] Formatted** Windows 用户 5/28/2014 9:46:00 PM

15 No underline, Font color: Auto, English (U.S.)

16  
17 **Page 25: [552] Formatted** Windows 用户 5/28/2014 9:46:00 PM

18 No underline, Font color: Auto, English (U.S.)

19  
20 **Page 25: [553] Formatted** Windows 用户 5/28/2014 9:46:00 PM

21 No underline, Font color: Auto, English (U.S.)

22  
23 **Page 25: [553] Formatted** Windows 用户 5/28/2014 9:46:00 PM

24 No underline, Font color: Auto, English (U.S.)

25  
26 **Page 25: [554] Formatted** Windows 用户 5/28/2014 9:46:00 PM

27 No underline, Font color: Auto, English (U.S.)

28  
29 **Page 25: [554] Formatted** Windows 用户 5/28/2014 9:46:00 PM

30 No underline, Font color: Auto, English (U.S.)

31  
32 **Page 25: [555] Formatted** Windows 用户 5/28/2014 9:46:00 PM

33 No underline, Font color: Auto, English (U.S.)

34  
35 **Page 25: [555] Formatted** Windows 用户 5/28/2014 9:46:00 PM

36 No underline, Font color: Auto, English (U.S.)

37  
38 **Page 25: [556] Formatted** Windows 用户 5/28/2014 9:46:00 PM

39 No underline, Font color: Auto, English (U.S.)

40  
41 **Page 25: [556] Formatted** Windows 用户 5/28/2014 9:46:00 PM

42 No underline, Font color: Auto, English (U.S.)

43  
44 **Page 25: [557] Formatted** Windows 用户 5/28/2014 9:46:00 PM

45 No underline, Font color: Auto, English (U.S.)

46  
47 **Page 25: [557] Formatted** Windows 用户 5/28/2014 9:46:00 PM

48 No underline, Font color: Auto, English (U.S.)

49  
50 **Page 25: [558] Formatted** Windows 用户 5/28/2014 9:46:00 PM

51 No underline, Font color: Auto, English (U.S.)

52  
53 **Page 25: [558] Formatted** Windows 用户 5/28/2014 9:46:00 PM

54 No underline, Font color: Auto, English (U.S.)

55  
56 **Page 25: [559] Formatted** Windows 用户 5/28/2014 9:46:00 PM

57 No underline, Font color: Auto, English (U.S.)

58  
59 **Page 25: [559] Formatted** Windows 用户 5/28/2014 9:46:00 PM

60 No underline, Font color: Auto, English (U.S.)

**Page 25: [560] Formatted** Windows 用户 5/28/2014 9:46:00 PM

No underline, Font color: Auto, English (U.S.)

**Page 25: [560] Formatted** Windows 用户 5/28/2014 9:46:00 PM

No underline, Font color: Auto, English (U.S.)

1  
2  
3  
4  
5  
6  
7  
8  
9  
10  
11 **Page 25: [561] Formatted** Windows 用户 5/28/2014 9:46:00 PM

12 No underline, Font color: Auto, English (U.S.)

13  
14 **Page 25: [561] Formatted** Windows 用户 5/28/2014 9:46:00 PM

15 No underline, Font color: Auto, English (U.S.)

16  
17 **Page 25: [562] Formatted** Windows 用户 5/28/2014 9:46:00 PM

18 No underline, Font color: Auto, English (U.S.)

19  
20 **Page 25: [562] Formatted** Windows 用户 5/28/2014 9:46:00 PM

21 No underline, Font color: Auto, English (U.S.)

22  
23 **Page 25: [563] Formatted** Windows 用户 5/28/2014 9:46:00 PM

24 No underline, Font color: Auto, English (U.S.)

25  
26 **Page 25: [563] Formatted** Windows 用户 5/28/2014 9:46:00 PM

27 No underline, Font color: Auto, English (U.S.)

28  
29 **Page 25: [564] Formatted** Windows 用户 5/28/2014 9:46:00 PM

30 No underline, Font color: Auto, English (U.S.)

31  
32 **Page 25: [564] Formatted** Windows 用户 5/28/2014 9:46:00 PM

33 No underline, Font color: Auto, English (U.S.)

34  
35 **Page 25: [565] Formatted** Windows 用户 5/28/2014 9:46:00 PM

36 No underline, Font color: Auto, English (U.S.)

37  
38 **Page 25: [565] Formatted** Windows 用户 5/28/2014 9:46:00 PM

39 No underline, Font color: Auto, English (U.S.)

40  
41 **Page 25: [566] Formatted** Windows 用户 5/28/2014 9:46:00 PM

42 No underline, Font color: Auto, English (U.S.)

43  
44 **Page 25: [566] Formatted** Windows 用户 5/28/2014 9:46:00 PM

45 No underline, Font color: Auto, English (U.S.)

46  
47 **Page 25: [567] Formatted** Windows 用户 5/28/2014 9:46:00 PM

48 No underline, Font color: Auto, English (U.S.)

49  
50 **Page 25: [567] Formatted** Windows 用户 5/28/2014 9:46:00 PM

51 No underline, Font color: Auto, English (U.S.)

52  
53 **Page 25: [568] Formatted** Windows 用户 5/28/2014 9:46:00 PM

54 No underline, Font color: Auto, English (U.S.)

55  
56 **Page 25: [568] Formatted** Windows 用户 5/28/2014 9:46:00 PM

57 No underline, Font color: Auto, English (U.S.)

58  
59 **Page 25: [569] Formatted** Windows 用户 5/28/2014 9:46:00 PM

60 No underline, Font color: Auto, English (U.S.)

**Page 25: [569] Formatted** Windows 用户 5/28/2014 9:46:00 PM

No underline, Font color: Auto, English (U.S.)

**Page 25: [570] Formatted** Windows 用户 5/28/2014 9:46:00 PM

No underline, Font color: Auto, English (U.S.)

1  
2  
3  
4  
5  
6  
7  
8  
9  
10  
11 **Page 25: [570] Formatted** Windows 用户 5/28/2014 9:46:00 PM

12 No underline, Font color: Auto, English (U.S.)

13  
14 **Page 25: [571] Formatted** Windows 用户 5/28/2014 9:46:00 PM

15 No underline, Font color: Auto, English (U.S.)

16  
17 **Page 25: [571] Formatted** Windows 用户 5/28/2014 9:46:00 PM

18 No underline, Font color: Auto, English (U.S.)

19  
20 **Page 25: [572] Formatted** Windows 用户 5/28/2014 9:46:00 PM

21 No underline, Font color: Auto, English (U.S.)

22  
23 **Page 25: [572] Formatted** Windows 用户 5/28/2014 9:46:00 PM

24 No underline, Font color: Auto, English (U.S.)

25  
26 **Page 25: [573] Formatted** Windows 用户 5/28/2014 9:46:00 PM

27 No underline, Font color: Auto, English (U.S.)

28  
29 **Page 25: [573] Formatted** Windows 用户 5/28/2014 9:46:00 PM

30 No underline, Font color: Auto, English (U.S.)

31  
32 **Page 25: [574] Formatted** Windows 用户 5/28/2014 9:46:00 PM

33 No underline, Font color: Auto, English (U.S.)

34  
35 **Page 25: [574] Formatted** Windows 用户 5/28/2014 9:46:00 PM

36 No underline, Font color: Auto, English (U.S.)

37  
38 **Page 25: [575] Formatted** Windows 用户 5/28/2014 9:46:00 PM

39 No underline, Font color: Auto, English (U.S.)

40  
41 **Page 25: [575] Formatted** Windows 用户 5/28/2014 9:46:00 PM

42 No underline, Font color: Auto, English (U.S.)

43  
44 **Page 25: [576] Formatted** Windows 用户 5/28/2014 9:46:00 PM

45 No underline, Font color: Auto, English (U.S.)

46  
47 **Page 25: [576] Formatted** Windows 用户 5/28/2014 9:46:00 PM

48 No underline, Font color: Auto, English (U.S.)

49  
50 **Page 25: [577] Formatted** Windows 用户 5/28/2014 9:46:00 PM

51 No underline, Font color: Auto, English (U.S.)

52  
53 **Page 25: [577] Formatted** Windows 用户 5/28/2014 9:46:00 PM

54 No underline, Font color: Auto, English (U.S.)

55  
56 **Page 25: [578] Formatted** Windows 用户 5/28/2014 9:46:00 PM

57 No underline, Font color: Auto, English (U.S.)

58  
59 **Page 25: [578] Formatted** Windows 用户 5/28/2014 9:46:00 PM

60 No underline, Font color: Auto, English (U.S.)

**Page 25: [579] Formatted** Windows 用户 5/28/2014 9:46:00 PM

No underline, Font color: Auto, English (U.S.)

**Page 25: [579] Formatted** Windows 用户 5/28/2014 9:46:00 PM

No underline, Font color: Auto, English (U.S.)

1  
2  
3  
4  
5  
6  
7  
8  
9  
10  
11 **Page 25: [580] Formatted** Windows 用户 5/28/2014 9:46:00 PM

12 No underline, Font color: Auto, English (U.S.)

13  
14 **Page 25: [580] Formatted** Windows 用户 5/28/2014 9:46:00 PM

15 No underline, Font color: Auto, English (U.S.)

16  
17 **Page 25: [581] Formatted** Windows 用户 5/28/2014 9:46:00 PM

18 No underline, Font color: Auto, English (U.S.)

19  
20 **Page 25: [581] Formatted** Windows 用户 5/28/2014 9:46:00 PM

21 No underline, Font color: Auto, English (U.S.)

22  
23 **Page 25: [582] Formatted** Windows 用户 5/28/2014 9:46:00 PM

24 No underline, Font color: Auto, English (U.S.)

25  
26 **Page 25: [582] Formatted** Windows 用户 5/28/2014 9:46:00 PM

27 No underline, Font color: Auto, English (U.S.)

28  
29 **Page 25: [583] Formatted** Windows 用户 5/28/2014 9:46:00 PM

30 No underline, Font color: Auto, English (U.S.)

31  
32 **Page 25: [583] Formatted** Windows 用户 5/28/2014 9:46:00 PM

33 No underline, Font color: Auto, English (U.S.)

34  
35 **Page 25: [584] Formatted** Windows 用户 5/28/2014 9:46:00 PM

36 No underline, Font color: Auto, English (U.S.)

37  
38 **Page 25: [584] Formatted** Windows 用户 5/28/2014 9:46:00 PM

39 No underline, Font color: Auto, English (U.S.)

40  
41 **Page 25: [585] Formatted** Windows 用户 5/28/2014 9:46:00 PM

42 No underline, Font color: Auto, English (U.S.)

43  
44 **Page 25: [585] Formatted** Windows 用户 5/28/2014 9:46:00 PM

45 No underline, Font color: Auto, English (U.S.)

46  
47 **Page 25: [586] Formatted** Windows 用户 5/28/2014 9:46:00 PM

48 No underline, Font color: Auto, English (U.S.)

49  
50 **Page 25: [586] Formatted** Windows 用户 5/28/2014 9:46:00 PM

51 No underline, Font color: Auto, English (U.S.)

52  
53 **Page 25: [587] Formatted** Windows 用户 5/28/2014 9:46:00 PM

54 No underline, Font color: Auto, English (U.S.)

55  
56 **Page 25: [587] Formatted** Windows 用户 5/28/2014 9:46:00 PM

57 No underline, Font color: Auto, English (U.S.)

58  
59 **Page 25: [588] Formatted** Windows 用户 5/28/2014 9:46:00 PM

60 No underline, Font color: Auto, English (U.S.)

**Page 25: [588] Formatted** Windows 用户 5/28/2014 9:46:00 PM

No underline, Font color: Auto, English (U.S.)

**Page 25: [589] Formatted** Windows 用户 5/28/2014 9:46:00 PM

No underline, Font color: Auto, English (U.S.)



1  
2  
3  
4  
5  
6  
7  
8  
9  
10  
11 **Page 25: [589] Formatted** Windows 用户 5/28/2014 9:46:00 PM

12 No underline, Font color: Auto, English (U.S.)

13  
14 **Page 25: [590] Formatted** Windows 用户 5/28/2014 9:46:00 PM

15 No underline, Font color: Auto, English (U.S.)

16  
17 **Page 25: [590] Formatted** Windows 用户 5/28/2014 9:46:00 PM

18 No underline, Font color: Auto, English (U.S.)

19  
20 **Page 25: [591] Formatted** Windows 用户 5/28/2014 9:46:00 PM

21 No underline, Font color: Auto, English (U.S.)

22  
23 **Page 25: [591] Formatted** Windows 用户 5/28/2014 9:46:00 PM

24 No underline, Font color: Auto, English (U.S.)

25  
26 **Page 25: [592] Formatted** Windows 用户 5/28/2014 9:46:00 PM

27 No underline, Font color: Auto, English (U.S.)

28  
29 **Page 25: [592] Formatted** Windows 用户 5/28/2014 9:46:00 PM

30 No underline, Font color: Auto, English (U.S.)

31  
32 **Page 25: [593] Formatted** Windows 用户 5/28/2014 9:46:00 PM

33 No underline, Font color: Auto, English (U.S.)

34  
35 **Page 25: [593] Formatted** Windows 用户 5/28/2014 9:46:00 PM

36 No underline, Font color: Auto, English (U.S.)

37  
38 **Page 25: [594] Formatted** Windows 用户 5/28/2014 9:46:00 PM

39 No underline, Font color: Auto, English (U.S.)

40  
41 **Page 25: [594] Formatted** Windows 用户 5/28/2014 9:46:00 PM

42 No underline, Font color: Auto, English (U.S.)

43  
44 **Page 25: [595] Formatted** Windows 用户 5/28/2014 9:46:00 PM

45 No underline, Font color: Auto, English (U.S.)

46  
47 **Page 25: [595] Formatted** Windows 用户 5/28/2014 9:46:00 PM

48 No underline, Font color: Auto, English (U.S.)

49  
50 **Page 25: [596] Formatted** Windows 用户 5/28/2014 9:46:00 PM

51 No underline, Font color: Auto, English (U.S.)

52  
53 **Page 25: [596] Formatted** Windows 用户 5/28/2014 9:46:00 PM

54 No underline, Font color: Auto, English (U.S.)

55  
56 **Page 25: [597] Formatted** Windows 用户 5/28/2014 9:46:00 PM

57 No underline, Font color: Auto, English (U.S.)

58  
59 **Page 25: [597] Formatted** Windows 用户 5/28/2014 9:46:00 PM

60 No underline, Font color: Auto, English (U.S.)

**Page 25: [598] Formatted** Windows 用户 5/28/2014 9:46:00 PM

No underline, Font color: Auto, English (U.S.)

**Page 25: [598] Formatted** Windows 用户 5/28/2014 9:46:00 PM

No underline, Font color: Auto, English (U.S.)



1  
2  
3  
4  
5  
6  
7  
8  
9  
10  
11 **Page 25: [599] Formatted** Windows 用户 5/28/2014 9:46:00 PM

12 No underline, Font color: Auto, English (U.S.)

13  
14 **Page 25: [599] Formatted** Windows 用户 5/28/2014 9:46:00 PM

15 No underline, Font color: Auto, English (U.S.)

16  
17 **Page 25: [600] Formatted** Windows 用户 5/28/2014 9:46:00 PM

18 No underline, Font color: Auto, English (U.S.)

19  
20 **Page 25: [600] Formatted** Windows 用户 5/28/2014 9:46:00 PM

21 No underline, Font color: Auto, English (U.S.)

22  
23 **Page 25: [601] Formatted** Windows 用户 5/28/2014 9:46:00 PM

24 No underline, Font color: Auto, English (U.S.)

25  
26 **Page 25: [601] Formatted** Windows 用户 5/28/2014 9:46:00 PM

27 No underline, Font color: Auto, English (U.S.)

28  
29 **Page 25: [602] Formatted** Windows 用户 5/28/2014 9:46:00 PM

30 No underline, Font color: Auto, English (U.S.)

31  
32 **Page 25: [602] Formatted** Windows 用户 5/28/2014 9:46:00 PM

33 No underline, Font color: Auto, English (U.S.)

34  
35 **Page 25: [603] Formatted** Windows 用户 5/28/2014 9:46:00 PM

36 No underline, Font color: Auto, English (U.S.)

37  
38 **Page 25: [603] Formatted** Windows 用户 5/28/2014 9:46:00 PM

39 No underline, Font color: Auto, English (U.S.)

40  
41 **Page 25: [604] Formatted** Windows 用户 5/28/2014 9:46:00 PM

42 No underline, Font color: Auto, English (U.S.)

43  
44 **Page 25: [604] Formatted** Windows 用户 5/28/2014 9:46:00 PM

45 No underline, Font color: Auto, English (U.S.)

46  
47 **Page 25: [605] Formatted** Windows 用户 5/28/2014 9:46:00 PM

48 No underline, Font color: Auto, English (U.S.)

49  
50 **Page 25: [605] Formatted** Windows 用户 5/28/2014 9:46:00 PM

51 No underline, Font color: Auto, English (U.S.)

52  
53 **Page 25: [606] Formatted** Windows 用户 5/28/2014 9:46:00 PM

54 No underline, Font color: Auto, English (U.S.)

55  
56 **Page 25: [606] Formatted** Windows 用户 5/28/2014 9:46:00 PM

57 No underline, Font color: Auto, English (U.S.)

58  
59 **Page 25: [607] Formatted** Windows 用户 5/28/2014 9:46:00 PM

60 No underline, Font color: Auto, English (U.S.)

**Page 25: [607] Formatted** Windows 用户 5/28/2014 9:46:00 PM

No underline, Font color: Auto, English (U.S.)

**Page 25: [608] Formatted** Windows 用户 5/28/2014 9:46:00 PM

No underline, Font color: Auto, English (U.S.)

1  
2  
3  
4  
5  
6  
7  
8  
9  
10  
11 **Page 25: [608] Formatted** Windows 用户 5/28/2014 9:46:00 PM

12 No underline, Font color: Auto, English (U.S.)

13  
14 **Page 25: [609] Formatted** Windows 用户 5/28/2014 9:46:00 PM

15 No underline, Font color: Auto, English (U.S.)

16  
17 **Page 25: [609] Formatted** Windows 用户 5/28/2014 9:46:00 PM

18 No underline, Font color: Auto, English (U.S.)

19  
20 **Page 25: [610] Formatted** Windows 用户 5/28/2014 9:46:00 PM

21 No underline, Font color: Auto, English (U.S.)

22  
23 **Page 25: [610] Formatted** Windows 用户 5/28/2014 9:46:00 PM

24 No underline, Font color: Auto, English (U.S.)

25  
26 **Page 25: [611] Formatted** Windows 用户 5/28/2014 9:46:00 PM

27 No underline, Font color: Auto, English (U.S.)

28  
29 **Page 25: [611] Formatted** Windows 用户 5/28/2014 9:46:00 PM

30 No underline, Font color: Auto, English (U.S.)

31  
32 **Page 25: [612] Formatted** Windows 用户 5/28/2014 9:46:00 PM

33 No underline, Font color: Auto, English (U.S.)

34  
35 **Page 25: [612] Formatted** Windows 用户 5/28/2014 9:46:00 PM

36 No underline, Font color: Auto, English (U.S.)

37  
38 **Page 25: [613] Formatted** Windows 用户 5/28/2014 9:46:00 PM

39 No underline, Font color: Auto, English (U.S.)

40  
41 **Page 25: [613] Formatted** Windows 用户 5/28/2014 9:46:00 PM

42 No underline, Font color: Auto, English (U.S.)

43  
44 **Page 25: [614] Formatted** Windows 用户 5/28/2014 9:46:00 PM

45 No underline, Font color: Auto, English (U.S.)

46  
47 **Page 25: [614] Formatted** Windows 用户 5/28/2014 9:46:00 PM

48 No underline, Font color: Auto, English (U.S.)

49  
50 **Page 25: [615] Formatted** Windows 用户 5/28/2014 9:46:00 PM

51 No underline, Font color: Auto, English (U.S.)

52  
53 **Page 25: [615] Formatted** Windows 用户 5/28/2014 9:46:00 PM

54 No underline, Font color: Auto, English (U.S.)

55  
56 **Page 25: [616] Formatted** Windows 用户 5/28/2014 9:46:00 PM

57 No underline, Font color: Auto, English (U.S.)

58  
59 **Page 25: [616] Formatted** Windows 用户 5/28/2014 9:46:00 PM

60 No underline, Font color: Auto, English (U.S.)

**Page 25: [617] Formatted** Windows 用户 5/28/2014 9:46:00 PM

No underline, Font color: Auto, English (U.S.)

**Page 25: [617] Formatted** Windows 用户 5/28/2014 9:46:00 PM

No underline, Font color: Auto, English (U.S.)

1  
2  
3  
4  
5  
6  
7  
8  
9  
10  
11 **Page 25: [618] Formatted** Windows 用户 5/28/2014 9:46:00 PM

12 No underline, Font color: Auto, English (U.S.)

13  
14 **Page 25: [618] Formatted** Windows 用户 5/28/2014 9:46:00 PM

15 No underline, Font color: Auto, English (U.S.)

16  
17 **Page 25: [619] Formatted** Windows 用户 5/28/2014 9:46:00 PM

18 No underline, Font color: Auto, English (U.S.)

19  
20 **Page 25: [619] Formatted** Windows 用户 5/28/2014 9:46:00 PM

21 No underline, Font color: Auto, English (U.S.)

22  
23 **Page 25: [620] Formatted** Windows 用户 5/28/2014 9:46:00 PM

24 No underline, Font color: Auto, English (U.S.)

25  
26 **Page 25: [620] Formatted** Windows 用户 5/28/2014 9:46:00 PM

27 No underline, Font color: Auto, English (U.S.)

28  
29 **Page 25: [621] Formatted** Windows 用户 5/28/2014 9:46:00 PM

30 No underline, Font color: Auto, English (U.S.)

31  
32 **Page 25: [621] Formatted** Windows 用户 5/28/2014 9:46:00 PM

33 No underline, Font color: Auto, English (U.S.)

34  
35 **Page 25: [622] Formatted** Windows 用户 5/28/2014 9:46:00 PM

36 No underline, Font color: Auto, English (U.S.)

37  
38 **Page 25: [622] Formatted** Windows 用户 5/28/2014 9:46:00 PM

39 No underline, Font color: Auto, English (U.S.)

40  
41 **Page 25: [623] Formatted** Windows 用户 5/28/2014 9:46:00 PM

42 No underline, Font color: Auto, English (U.S.)

43  
44 **Page 25: [623] Formatted** Windows 用户 5/28/2014 9:46:00 PM

45 No underline, Font color: Auto, English (U.S.)

46  
47 **Page 25: [624] Formatted** Windows 用户 5/28/2014 9:46:00 PM

48 No underline, Font color: Auto, English (U.S.)

49  
50 **Page 25: [624] Formatted** Windows 用户 5/28/2014 9:46:00 PM

51 No underline, Font color: Auto, English (U.S.)

52  
53 **Page 25: [625] Formatted** Windows 用户 5/28/2014 9:46:00 PM

54 No underline, Font color: Auto, English (U.S.)

55  
56 **Page 25: [625] Formatted** Windows 用户 5/28/2014 9:46:00 PM

57 No underline, Font color: Auto, English (U.S.)

58  
59 **Page 25: [626] Formatted** Windows 用户 5/28/2014 9:46:00 PM

60 No underline, Font color: Auto, English (U.S.)

**Page 25: [626] Formatted** Windows 用户 5/28/2014 9:46:00 PM

No underline, Font color: Auto, English (U.S.)

**Page 25: [627] Formatted** Windows 用户 5/28/2014 9:46:00 PM

No underline, Font color: Auto, English (U.S.)

1  
2  
3  
4  
5  
6  
7  
8  
9  
10  
11 **Page 25: [627] Formatted** Windows 用户 5/28/2014 9:46:00 PM

12 No underline, Font color: Auto, English (U.S.)

13  
14 **Page 25: [628] Formatted** Windows 用户 5/28/2014 9:46:00 PM

15 No underline, Font color: Auto, English (U.S.)

16  
17 **Page 25: [628] Formatted** Windows 用户 5/28/2014 9:46:00 PM

18 No underline, Font color: Auto, English (U.S.)

19  
20 **Page 25: [629] Formatted** Windows 用户 5/28/2014 9:46:00 PM

21 No underline, Font color: Auto, English (U.S.)

22  
23 **Page 25: [629] Formatted** Windows 用户 5/28/2014 9:46:00 PM

24 No underline, Font color: Auto, English (U.S.)

25  
26 **Page 25: [630] Formatted** Windows 用户 5/28/2014 9:46:00 PM

27 No underline, Font color: Auto, English (U.S.)

28  
29 **Page 25: [630] Formatted** Windows 用户 5/28/2014 9:46:00 PM

30 No underline, Font color: Auto, English (U.S.)

31  
32 **Page 25: [631] Formatted** Windows 用户 5/28/2014 9:46:00 PM

33 No underline, Font color: Auto, English (U.S.)

34  
35 **Page 25: [631] Formatted** Windows 用户 5/28/2014 9:46:00 PM

36 No underline, Font color: Auto, English (U.S.)

37  
38 **Page 25: [632] Formatted** Windows 用户 5/28/2014 9:46:00 PM

39 No underline, Font color: Auto, English (U.S.)

40  
41 **Page 25: [632] Formatted** Windows 用户 5/28/2014 9:46:00 PM

42 No underline, Font color: Auto, English (U.S.)

43  
44 **Page 25: [633] Formatted** Windows 用户 5/28/2014 9:46:00 PM

45 No underline, Font color: Auto, English (U.S.)

46  
47 **Page 25: [633] Formatted** Windows 用户 5/28/2014 9:46:00 PM

48 No underline, Font color: Auto, English (U.S.)

49  
50 **Page 25: [634] Formatted** Windows 用户 5/28/2014 9:46:00 PM

51 No underline, Font color: Auto, English (U.S.)

52  
53 **Page 25: [634] Formatted** Windows 用户 5/28/2014 9:46:00 PM

54 No underline, Font color: Auto, English (U.S.)

55  
56 **Page 25: [635] Formatted** Windows 用户 5/28/2014 9:46:00 PM

57 No underline, Font color: Auto, English (U.S.)

58  
59 **Page 25: [635] Formatted** Windows 用户 5/28/2014 9:46:00 PM

60 No underline, Font color: Auto, English (U.S.)

**Page 25: [636] Formatted** Windows 用户 5/28/2014 9:46:00 PM

No underline, Font color: Auto, English (U.S.)

**Page 25: [636] Formatted** Windows 用户 5/28/2014 9:46:00 PM

No underline, Font color: Auto, English (U.S.)

1  
2  
3  
4  
5  
6  
7  
8  
9  
10  
11 **Page 25: [637] Formatted** Windows 用户 5/28/2014 9:46:00 PM

12 No underline, Font color: Auto, English (U.S.)

13  
14 **Page 25: [637] Formatted** Windows 用户 5/28/2014 9:46:00 PM

15 No underline, Font color: Auto, English (U.S.)

16  
17 **Page 25: [638] Formatted** Windows 用户 5/28/2014 9:46:00 PM

18 No underline, Font color: Auto, English (U.S.)

19  
20 **Page 25: [638] Formatted** Windows 用户 5/28/2014 9:46:00 PM

21 No underline, Font color: Auto, English (U.S.)

22  
23 **Page 25: [639] Formatted** Windows 用户 5/28/2014 9:46:00 PM

24 No underline, Font color: Auto, English (U.S.)

25  
26 **Page 25: [639] Formatted** Windows 用户 5/28/2014 9:46:00 PM

27 No underline, Font color: Auto, English (U.S.)

28  
29 **Page 25: [640] Formatted** Windows 用户 5/28/2014 9:46:00 PM

30 No underline, Font color: Auto, English (U.S.)

31  
32 **Page 25: [640] Formatted** Windows 用户 5/28/2014 9:46:00 PM

33 No underline, Font color: Auto, English (U.S.)

34  
35 **Page 25: [641] Formatted** Windows 用户 5/28/2014 9:46:00 PM

36 No underline, Font color: Auto, English (U.S.)

37  
38 **Page 25: [641] Formatted** Windows 用户 5/28/2014 9:46:00 PM

39 No underline, Font color: Auto, English (U.S.)

40  
41 **Page 25: [642] Formatted** Windows 用户 5/28/2014 9:46:00 PM

42 No underline, Font color: Auto, English (U.S.)

43  
44 **Page 25: [642] Formatted** Windows 用户 5/28/2014 9:46:00 PM

45 No underline, Font color: Auto, English (U.S.)

46  
47 **Page 25: [643] Formatted** Windows 用户 5/28/2014 9:46:00 PM

48 No underline, Font color: Auto, English (U.S.)

49  
50 **Page 25: [643] Formatted** Windows 用户 5/28/2014 9:46:00 PM

51 No underline, Font color: Auto, English (U.S.)

52  
53 **Page 25: [644] Formatted** Windows 用户 5/28/2014 9:46:00 PM

54 No underline, Font color: Auto, English (U.S.)

55  
56 **Page 25: [644] Formatted** Windows 用户 5/28/2014 9:46:00 PM

57 No underline, Font color: Auto, English (U.S.)

58  
59 **Page 25: [645] Formatted** Windows 用户 5/28/2014 9:46:00 PM

60 No underline, Font color: Auto, English (U.S.)

**Page 25: [645] Formatted** Windows 用户 5/28/2014 9:46:00 PM

No underline, Font color: Auto, English (U.S.)

**Page 25: [646] Formatted** Windows 用户 5/28/2014 9:46:00 PM

No underline, Font color: Auto, English (U.S.)

1  
2  
3  
4  
5  
6  
7  
8  
9  
10  
11 **Page 25: [646] Formatted** Windows 用户 5/28/2014 9:46:00 PM

12 No underline, Font color: Auto, English (U.S.)

13  
14 **Page 25: [647] Formatted** Windows 用户 5/28/2014 9:46:00 PM

15 No underline, Font color: Auto, English (U.S.)

16  
17 **Page 25: [647] Formatted** Windows 用户 5/28/2014 9:46:00 PM

18 No underline, Font color: Auto, English (U.S.)

19  
20 **Page 25: [648] Formatted** Windows 用户 5/28/2014 9:46:00 PM

21 No underline, Font color: Auto, English (U.S.)

22  
23 **Page 25: [648] Formatted** Windows 用户 5/28/2014 9:46:00 PM

24 No underline, Font color: Auto, English (U.S.)

25  
26 **Page 25: [649] Formatted** Windows 用户 5/28/2014 9:46:00 PM

27 No underline, Font color: Auto, English (U.S.)

28  
29 **Page 25: [649] Formatted** Windows 用户 5/28/2014 9:46:00 PM

30 No underline, Font color: Auto, English (U.S.)

31  
32 **Page 25: [650] Formatted** Windows 用户 5/28/2014 9:46:00 PM

33 No underline, Font color: Auto, English (U.S.)

34  
35 **Page 25: [650] Formatted** Windows 用户 5/28/2014 9:46:00 PM

36 No underline, Font color: Auto, English (U.S.)

37  
38 **Page 25: [651] Formatted** Windows 用户 5/28/2014 9:46:00 PM

39 No underline, Font color: Auto, English (U.S.)

40  
41 **Page 25: [651] Formatted** Windows 用户 5/28/2014 9:46:00 PM

42 No underline, Font color: Auto, English (U.S.)

43  
44 **Page 25: [652] Formatted** Windows 用户 5/28/2014 9:46:00 PM

45 No underline, Font color: Auto, English (U.S.)

46  
47 **Page 25: [652] Formatted** Windows 用户 5/28/2014 9:46:00 PM

48 No underline, Font color: Auto, English (U.S.)

49  
50 **Page 25: [653] Formatted** Windows 用户 5/28/2014 9:46:00 PM

51 No underline, Font color: Auto, English (U.S.)

52  
53 **Page 25: [653] Formatted** Windows 用户 5/28/2014 9:46:00 PM

54 No underline, Font color: Auto, English (U.S.)

55  
56 **Page 25: [654] Formatted** Windows 用户 5/28/2014 9:46:00 PM

57 No underline, Font color: Auto, English (U.S.)

58  
59 **Page 25: [654] Formatted** Windows 用户 5/28/2014 9:46:00 PM

60 No underline, Font color: Auto, English (U.S.)

**Page 25: [655] Formatted** Windows 用户 5/28/2014 9:46:00 PM

No underline, Font color: Auto, English (U.S.)

**Page 25: [655] Formatted** Windows 用户 5/28/2014 9:46:00 PM

No underline, Font color: Auto, English (U.S.)

1  
2  
3  
4  
5  
6  
7  
8  
9  
10  
11 **Page 25: [656] Formatted** Windows 用户 5/28/2014 9:46:00 PM

12 No underline, Font color: Auto, English (U.S.)

13  
14 **Page 25: [656] Formatted** Windows 用户 5/28/2014 9:46:00 PM

15 No underline, Font color: Auto, English (U.S.)

16  
17 **Page 25: [657] Formatted** Windows 用户 5/28/2014 9:46:00 PM

18 No underline, Font color: Auto, English (U.S.)

19  
20 **Page 25: [657] Formatted** Windows 用户 5/28/2014 9:46:00 PM

21 No underline, Font color: Auto, English (U.S.)

22  
23 **Page 25: [658] Formatted** Windows 用户 5/28/2014 9:46:00 PM

24 No underline, Font color: Auto, English (U.S.)

25  
26 **Page 25: [658] Formatted** Windows 用户 5/28/2014 9:46:00 PM

27 No underline, Font color: Auto, English (U.S.)

28  
29 **Page 25: [659] Formatted** Windows 用户 5/28/2014 9:46:00 PM

30 No underline, Font color: Auto, English (U.S.)

31  
32 **Page 25: [659] Formatted** Windows 用户 5/28/2014 9:46:00 PM

33 No underline, Font color: Auto, English (U.S.)

34  
35 **Page 25: [660] Formatted** Windows 用户 5/28/2014 9:46:00 PM

36 No underline, Font color: Auto, English (U.S.)

37  
38 **Page 25: [660] Formatted** Windows 用户 5/28/2014 9:46:00 PM

39 No underline, Font color: Auto, English (U.S.)

40  
41 **Page 25: [661] Formatted** Windows 用户 5/28/2014 9:46:00 PM

42 No underline, Font color: Auto, English (U.S.)

43  
44 **Page 25: [661] Formatted** Windows 用户 5/28/2014 9:46:00 PM

45 No underline, Font color: Auto, English (U.S.)

46  
47 **Page 25: [662] Formatted** Windows 用户 5/28/2014 9:46:00 PM

48 No underline, Font color: Auto, English (U.S.)

49  
50 **Page 25: [662] Formatted** Windows 用户 5/28/2014 9:46:00 PM

51 No underline, Font color: Auto, English (U.S.)

52  
53 **Page 25: [663] Formatted** Windows 用户 5/28/2014 9:46:00 PM

54 No underline, Font color: Auto, English (U.S.)

55  
56 **Page 25: [663] Formatted** Windows 用户 5/28/2014 9:46:00 PM

57 No underline, Font color: Auto, English (U.S.)

58  
59 **Page 25: [664] Formatted** Windows 用户 5/28/2014 9:46:00 PM

60 No underline, Font color: Auto, English (U.S.)

**Page 25: [664] Formatted** Windows 用户 5/28/2014 9:46:00 PM

No underline, Font color: Auto, English (U.S.)

**Page 25: [665] Formatted** Windows 用户 5/28/2014 9:46:00 PM

No underline, Font color: Auto, English (U.S.)



1  
2  
3  
4  
5  
6  
7  
8  
9  
10  
11 **Page 25: [665] Formatted** Windows 用户 5/28/2014 9:46:00 PM

12 No underline, Font color: Auto, English (U.S.)

13 **Page 25: [666] Formatted** Windows 用户 5/28/2014 9:46:00 PM

14 No underline, Font color: Auto, English (U.S.)

15 **Page 25: [666] Formatted** Windows 用户 5/28/2014 9:46:00 PM

16 No underline, Font color: Auto, English (U.S.)

17 **Page 25: [667] Formatted** 作者 5/28/2014 9:46:00 PM

18 English (U.K.)

19 **Page 25: [668] Formatted** 作者 5/28/2014 9:46:00 PM

20 Font: Not Bold, English (U.K.)

21 **Page 25: [669] Formatted** USER 5/28/2014 9:55:00 PM

22 Centered, First line: 0 ch

23 **Page 25: [670] Formatted Table** Windows 用户 5/23/2014 3:32:00 PM

24 Formatted Table

25 **Page 27: [671] Formatted** 作者 5/28/2014 9:46:00 PM

26 English (U.K.)

27 **Page 27: [672] Formatted** 作者 5/28/2014 9:46:00 PM

28 No underline, Font color: Auto, English (U.K.)

29 **Page 27: [672] Formatted** 作者 5/28/2014 9:46:00 PM

30 No underline, Font color: Auto, English (U.K.)

31 **Page 27: [673] Formatted** Windows 用户 5/28/2014 9:46:00 PM

32 No underline, Font color: Auto, English (U.S.)

33 **Page 27: [673] Formatted** Windows 用户 5/28/2014 9:46:00 PM

34 No underline, Font color: Auto, English (U.S.)

35 **Page 27: [674] Formatted** Windows 用户 5/28/2014 9:46:00 PM

36 No underline, Font color: Auto, English (U.S.)

37 **Page 27: [674] Formatted** Windows 用户 5/28/2014 9:46:00 PM

38 No underline, Font color: Auto, English (U.S.)

39 **Page 27: [675] Formatted** Windows 用户 5/28/2014 9:46:00 PM

40 No underline, Font color: Auto, English (U.S.)

41 **Page 27: [675] Formatted** Windows 用户 5/28/2014 9:46:00 PM

42 No underline, Font color: Auto, English (U.S.)

43 **Page 27: [676] Formatted** Windows 用户 5/28/2014 9:46:00 PM

44 No underline, Font color: Auto, English (U.S.)

45 **Page 27: [676] Formatted** Windows 用户 5/28/2014 9:46:00 PM

46 No underline, Font color: Auto, English (U.S.)

47 **Page 27: [677] Formatted** Windows 用户 5/28/2014 9:46:00 PM

48 No underline, Font color: Auto, English (U.S.)



1  
2  
3  
4  
5  
6  
7  
8  
9  
10  
11 No underline, Font color: Auto, English (U.S.)

12 **Page 27: [678] Formatted** Windows 用户 5/28/2014 9:46:00 PM

13 No underline, Font color: Auto, English (U.S.)

14 **Page 27: [678] Formatted** Windows 用户 5/28/2014 9:46:00 PM

15 No underline, Font color: Auto, English (U.S.)

16 **Page 27: [679] Formatted** Windows 用户 5/28/2014 9:46:00 PM

17 No underline, Font color: Auto, English (U.S.)

18 **Page 27: [679] Formatted** Windows 用户 5/28/2014 9:46:00 PM

19 No underline, Font color: Auto, English (U.S.)

20 **Page 27: [680] Formatted** Windows 用户 5/28/2014 9:46:00 PM

21 No underline, Font color: Auto, English (U.S.)

22 **Page 27: [680] Formatted** Windows 用户 5/28/2014 9:46:00 PM

23 No underline, Font color: Auto, English (U.S.)

24 **Page 27: [681] Formatted** Windows 用户 5/28/2014 9:46:00 PM

25 No underline, Font color: Auto, English (U.S.)

26 **Page 27: [682] Formatted** 作者 5/28/2014 9:46:00 PM

27 No underline, Font color: Auto, English (U.K.)

28 **Page 27: [683] Formatted** Windows 用户 5/28/2014 9:46:00 PM

29 No underline, Font color: Auto, English (U.S.)

30 **Page 27: [683] Formatted** Windows 用户 5/28/2014 9:46:00 PM

31 No underline, Font color: Auto, English (U.S.)

32 **Page 27: [684] Formatted** Windows 用户 5/28/2014 9:46:00 PM

33 No underline, Font color: Auto, English (U.S.)

34 **Page 27: [684] Formatted** Windows 用户 5/28/2014 9:46:00 PM

35 No underline, Font color: Auto, English (U.S.)

36 **Page 27: [685] Formatted** Windows 用户 5/28/2014 9:46:00 PM

37 No underline, Font color: Auto, English (U.S.)

38 **Page 27: [685] Formatted** Windows 用户 5/28/2014 9:46:00 PM

39 No underline, Font color: Auto, English (U.S.)

40 **Page 27: [686] Formatted** Windows 用户 5/28/2014 9:46:00 PM

41 No underline, Font color: Auto, English (U.S.)

42 **Page 27: [686] Formatted** Windows 用户 5/28/2014 9:46:00 PM

43 No underline, Font color: Auto, English (U.S.)

44 **Page 27: [687] Formatted** Windows 用户 5/28/2014 9:46:00 PM

45 No underline, Font color: Auto, English (U.S.)

46 **Page 27: [688] Formatted** 作者 5/28/2014 9:46:00 PM

47 No underline, Font color: Auto, English (U.K.)

48 **Page 27: [689] Formatted** Windows 用户 5/28/2014 9:46:00 PM

1  
2  
3  
4  
5  
6  
7  
8  
9  
10  
11  
12  
13  
14  
15  
16  
17  
18  
19  
20  
21  
22  
23  
24  
25  
26  
27  
28  
29  
30  
31  
32  
33  
34  
35  
36  
37  
38  
39  
40  
41  
42  
43  
44  
45  
46  
47  
48  
49  
50  
51  
52  
53  
54  
55  
56  
57  
58  
59  
60

|                                 |                   |                             |
|---------------------------------|-------------------|-----------------------------|
| <b>Page 27: [689] Formatted</b> | <b>Windows 用户</b> | <b>5/28/2014 9:46:00 PM</b> |
|---------------------------------|-------------------|-----------------------------|

No underline, Font color: Auto, English (U.S.)

|                                 |                   |                             |
|---------------------------------|-------------------|-----------------------------|
| <b>Page 27: [690] Formatted</b> | <b>Windows 用户</b> | <b>5/28/2014 9:46:00 PM</b> |
|---------------------------------|-------------------|-----------------------------|

No underline, Font color: Auto, English (U.S.)

|                                 |                   |                             |
|---------------------------------|-------------------|-----------------------------|
| <b>Page 27: [690] Formatted</b> | <b>Windows 用户</b> | <b>5/28/2014 9:46:00 PM</b> |
|---------------------------------|-------------------|-----------------------------|

No underline, Font color: Auto, English (U.S.)

|                                 |                   |                             |
|---------------------------------|-------------------|-----------------------------|
| <b>Page 27: [691] Formatted</b> | <b>Windows 用户</b> | <b>5/28/2014 9:46:00 PM</b> |
|---------------------------------|-------------------|-----------------------------|

No underline, Font color: Auto, English (U.S.)

|                                 |                   |                             |
|---------------------------------|-------------------|-----------------------------|
| <b>Page 27: [691] Formatted</b> | <b>Windows 用户</b> | <b>5/28/2014 9:46:00 PM</b> |
|---------------------------------|-------------------|-----------------------------|

No underline, Font color: Auto, English (U.S.)

|                                 |                   |                             |
|---------------------------------|-------------------|-----------------------------|
| <b>Page 27: [692] Formatted</b> | <b>Windows 用户</b> | <b>5/28/2014 9:46:00 PM</b> |
|---------------------------------|-------------------|-----------------------------|

No underline, Font color: Auto, English (U.S.)

|                                 |                   |                             |
|---------------------------------|-------------------|-----------------------------|
| <b>Page 27: [692] Formatted</b> | <b>Windows 用户</b> | <b>5/28/2014 9:46:00 PM</b> |
|---------------------------------|-------------------|-----------------------------|

No underline, Font color: Auto, English (U.S.)

|                                 |                   |                             |
|---------------------------------|-------------------|-----------------------------|
| <b>Page 27: [693] Formatted</b> | <b>Windows 用户</b> | <b>5/28/2014 9:46:00 PM</b> |
|---------------------------------|-------------------|-----------------------------|

No underline, Font color: Auto, English (U.S.)

|                                 |           |                             |
|---------------------------------|-----------|-----------------------------|
| <b>Page 27: [694] Formatted</b> | <b>作者</b> | <b>5/28/2014 9:46:00 PM</b> |
|---------------------------------|-----------|-----------------------------|

No underline, Font color: Auto, English (U.K.)

|                                 |                   |                             |
|---------------------------------|-------------------|-----------------------------|
| <b>Page 27: [695] Formatted</b> | <b>Windows 用户</b> | <b>5/28/2014 9:46:00 PM</b> |
|---------------------------------|-------------------|-----------------------------|

No underline, Font color: Auto, English (U.S.)

|                                 |                   |                             |
|---------------------------------|-------------------|-----------------------------|
| <b>Page 27: [695] Formatted</b> | <b>Windows 用户</b> | <b>5/28/2014 9:46:00 PM</b> |
|---------------------------------|-------------------|-----------------------------|

No underline, Font color: Auto, English (U.S.)

|                                 |                   |                             |
|---------------------------------|-------------------|-----------------------------|
| <b>Page 27: [696] Formatted</b> | <b>Windows 用户</b> | <b>5/28/2014 9:46:00 PM</b> |
|---------------------------------|-------------------|-----------------------------|

No underline, Font color: Auto, English (U.S.)

|                                 |                   |                             |
|---------------------------------|-------------------|-----------------------------|
| <b>Page 27: [696] Formatted</b> | <b>Windows 用户</b> | <b>5/28/2014 9:46:00 PM</b> |
|---------------------------------|-------------------|-----------------------------|

No underline, Font color: Auto, English (U.S.)

|                                 |                   |                             |
|---------------------------------|-------------------|-----------------------------|
| <b>Page 27: [697] Formatted</b> | <b>Windows 用户</b> | <b>5/28/2014 9:46:00 PM</b> |
|---------------------------------|-------------------|-----------------------------|

No underline, Font color: Auto, English (U.S.)

|                                 |                   |                             |
|---------------------------------|-------------------|-----------------------------|
| <b>Page 27: [697] Formatted</b> | <b>Windows 用户</b> | <b>5/28/2014 9:46:00 PM</b> |
|---------------------------------|-------------------|-----------------------------|

No underline, Font color: Auto, English (U.S.)

|                                 |                   |                             |
|---------------------------------|-------------------|-----------------------------|
| <b>Page 27: [698] Formatted</b> | <b>Windows 用户</b> | <b>5/28/2014 9:46:00 PM</b> |
|---------------------------------|-------------------|-----------------------------|

No underline, Font color: Auto, English (U.S.)

|                                 |                   |                             |
|---------------------------------|-------------------|-----------------------------|
| <b>Page 27: [698] Formatted</b> | <b>Windows 用户</b> | <b>5/28/2014 9:46:00 PM</b> |
|---------------------------------|-------------------|-----------------------------|

No underline, Font color: Auto, English (U.S.)

|                                 |                   |                             |
|---------------------------------|-------------------|-----------------------------|
| <b>Page 27: [699] Formatted</b> | <b>Windows 用户</b> | <b>5/28/2014 9:46:00 PM</b> |
|---------------------------------|-------------------|-----------------------------|

No underline, Font color: Auto, English (U.S.) <http://bmjopen.bmj.com/site/about/guidelines.xhtml>

|                                 |                   |                             |
|---------------------------------|-------------------|-----------------------------|
| <b>Page 27: [699] Formatted</b> | <b>Windows 用户</b> | <b>5/28/2014 9:46:00 PM</b> |
|---------------------------------|-------------------|-----------------------------|

No underline, Font color: Auto, English (U.S.)

1  
2  
3  
4  
5  
6  
7  
8  
9  
10  
11 **Page 27: [700] Formatted** Windows 用户 5/28/2014 9:46:00 PM

12 No underline, Font color: Auto, English (U.S.)

13  
14 **Page 27: [700] Formatted** Windows 用户 5/28/2014 9:46:00 PM

15 No underline, Font color: Auto, English (U.S.)

16  
17 **Page 27: [701] Formatted** Windows 用户 5/28/2014 9:46:00 PM

18 No underline, Font color: Auto, English (U.S.)

19  
20 **Page 27: [701] Formatted** Windows 用户 5/28/2014 9:46:00 PM

21 No underline, Font color: Auto, English (U.S.)

22  
23 **Page 27: [702] Formatted** Windows 用户 5/28/2014 9:46:00 PM

24 No underline, Font color: Auto, English (U.S.)

25  
26 **Page 27: [702] Formatted** Windows 用户 5/28/2014 9:46:00 PM

27 No underline, Font color: Auto, English (U.S.)

28  
29 **Page 27: [703] Formatted** Windows 用户 5/28/2014 9:46:00 PM

30 No underline, Font color: Auto, English (U.S.)

31  
32 **Page 27: [703] Formatted** Windows 用户 5/28/2014 9:46:00 PM

33 No underline, Font color: Auto, English (U.S.)

34  
35 **Page 27: [704] Formatted** Windows 用户 5/28/2014 9:46:00 PM

36 No underline, Font color: Auto, English (U.S.)

37  
38 **Page 27: [704] Formatted** Windows 用户 5/28/2014 9:46:00 PM

39 No underline, Font color: Auto, English (U.S.)

40  
41 **Page 27: [705] Formatted** Windows 用户 5/28/2014 9:46:00 PM

42 No underline, Font color: Auto, English (U.S.)

43  
44 **Page 27: [705] Formatted** Windows 用户 5/28/2014 9:46:00 PM

45 No underline, Font color: Auto, English (U.S.)

46  
47 **Page 27: [706] Formatted** Windows 用户 5/28/2014 9:46:00 PM

48 No underline, Font color: Auto, English (U.S.)

49  
50 **Page 27: [706] Formatted** Windows 用户 5/28/2014 9:46:00 PM

51 No underline, Font color: Auto, English (U.S.)

52  
53 **Page 27: [707] Formatted** Windows 用户 5/28/2014 9:46:00 PM

54 No underline, Font color: Auto, English (U.S.)

55  
56 **Page 27: [707] Formatted** Windows 用户 5/28/2014 9:46:00 PM

57 No underline, Font color: Auto, English (U.S.)

58  
59 **Page 27: [708] Formatted** Windows 用户 5/28/2014 9:46:00 PM

60 No underline, Font color: Auto, English (U.S.)

**Page 27: [708] Formatted** Windows 用户 5/28/2014 9:46:00 PM

No underline, Font color: Auto, English (U.S.)

**Page 27: [709] Formatted** Windows 用户 5/28/2014 9:46:00 PM

No underline, Font color: Auto, English (U.S.)

1  
2  
3  
4  
5  
6  
7  
8  
9  
10  
11  
12  
13  
14  
15  
16  
17  
18  
19  
20  
21  
22  
23  
24  
25  
26  
27  
28  
29  
30  
31  
32  
33  
34  
35  
36  
37  
38  
39  
40  
41  
42  
43  
44  
45  
46  
47  
48  
49  
50  
51  
52  
53  
54  
55  
56  
57  
58  
59  
60

|                                 |                   |                             |
|---------------------------------|-------------------|-----------------------------|
| <b>Page 27: [709] Formatted</b> | <b>Windows 用户</b> | <b>5/28/2014 9:46:00 PM</b> |
|---------------------------------|-------------------|-----------------------------|

No underline, Font color: Auto, English (U.S.)

|                                 |                   |                             |
|---------------------------------|-------------------|-----------------------------|
| <b>Page 27: [710] Formatted</b> | <b>Windows 用户</b> | <b>5/28/2014 9:46:00 PM</b> |
|---------------------------------|-------------------|-----------------------------|

No underline, Font color: Auto, English (U.S.)

|                                 |                   |                             |
|---------------------------------|-------------------|-----------------------------|
| <b>Page 27: [710] Formatted</b> | <b>Windows 用户</b> | <b>5/28/2014 9:46:00 PM</b> |
|---------------------------------|-------------------|-----------------------------|

No underline, Font color: Auto, English (U.S.)

|                                 |                   |                             |
|---------------------------------|-------------------|-----------------------------|
| <b>Page 27: [711] Formatted</b> | <b>Windows 用户</b> | <b>5/28/2014 9:46:00 PM</b> |
|---------------------------------|-------------------|-----------------------------|

No underline, Font color: Auto, English (U.S.)

|                                 |                   |                             |
|---------------------------------|-------------------|-----------------------------|
| <b>Page 27: [711] Formatted</b> | <b>Windows 用户</b> | <b>5/28/2014 9:46:00 PM</b> |
|---------------------------------|-------------------|-----------------------------|

No underline, Font color: Auto, English (U.S.)

|                                 |                   |                             |
|---------------------------------|-------------------|-----------------------------|
| <b>Page 27: [712] Formatted</b> | <b>Windows 用户</b> | <b>5/28/2014 9:46:00 PM</b> |
|---------------------------------|-------------------|-----------------------------|

No underline, Font color: Auto, English (U.S.)

|                                 |                   |                             |
|---------------------------------|-------------------|-----------------------------|
| <b>Page 27: [712] Formatted</b> | <b>Windows 用户</b> | <b>5/28/2014 9:46:00 PM</b> |
|---------------------------------|-------------------|-----------------------------|

No underline, Font color: Auto, English (U.S.)

|                                 |                   |                             |
|---------------------------------|-------------------|-----------------------------|
| <b>Page 27: [713] Formatted</b> | <b>Windows 用户</b> | <b>5/28/2014 9:46:00 PM</b> |
|---------------------------------|-------------------|-----------------------------|

No underline, Font color: Auto, English (U.S.)

|                                 |                   |                             |
|---------------------------------|-------------------|-----------------------------|
| <b>Page 27: [713] Formatted</b> | <b>Windows 用户</b> | <b>5/28/2014 9:46:00 PM</b> |
|---------------------------------|-------------------|-----------------------------|

No underline, Font color: Auto, English (U.S.)

|                                 |                   |                             |
|---------------------------------|-------------------|-----------------------------|
| <b>Page 27: [714] Formatted</b> | <b>Windows 用户</b> | <b>5/28/2014 9:46:00 PM</b> |
|---------------------------------|-------------------|-----------------------------|

No underline, Font color: Auto, English (U.S.)

|                                 |                   |                             |
|---------------------------------|-------------------|-----------------------------|
| <b>Page 27: [714] Formatted</b> | <b>Windows 用户</b> | <b>5/28/2014 9:46:00 PM</b> |
|---------------------------------|-------------------|-----------------------------|

No underline, Font color: Auto, English (U.S.)

|                                 |                   |                             |
|---------------------------------|-------------------|-----------------------------|
| <b>Page 27: [715] Formatted</b> | <b>Windows 用户</b> | <b>5/28/2014 9:46:00 PM</b> |
|---------------------------------|-------------------|-----------------------------|

No underline, Font color: Auto, English (U.S.)

|                                 |                   |                             |
|---------------------------------|-------------------|-----------------------------|
| <b>Page 27: [715] Formatted</b> | <b>Windows 用户</b> | <b>5/28/2014 9:46:00 PM</b> |
|---------------------------------|-------------------|-----------------------------|

No underline, Font color: Auto, English (U.S.)

|                                 |                   |                             |
|---------------------------------|-------------------|-----------------------------|
| <b>Page 27: [716] Formatted</b> | <b>Windows 用户</b> | <b>5/28/2014 9:46:00 PM</b> |
|---------------------------------|-------------------|-----------------------------|

No underline, Font color: Auto, English (U.S.)

|                                 |                   |                             |
|---------------------------------|-------------------|-----------------------------|
| <b>Page 27: [716] Formatted</b> | <b>Windows 用户</b> | <b>5/28/2014 9:46:00 PM</b> |
|---------------------------------|-------------------|-----------------------------|

No underline, Font color: Auto, English (U.S.)

|                                 |                   |                             |
|---------------------------------|-------------------|-----------------------------|
| <b>Page 27: [717] Formatted</b> | <b>Windows 用户</b> | <b>5/28/2014 9:46:00 PM</b> |
|---------------------------------|-------------------|-----------------------------|

No underline, Font color: Auto, English (U.S.)

|                                 |                   |                             |
|---------------------------------|-------------------|-----------------------------|
| <b>Page 27: [717] Formatted</b> | <b>Windows 用户</b> | <b>5/28/2014 9:46:00 PM</b> |
|---------------------------------|-------------------|-----------------------------|

No underline, Font color: Auto, English (U.S.)

|                                 |                   |                             |
|---------------------------------|-------------------|-----------------------------|
| <b>Page 27: [718] Formatted</b> | <b>Windows 用户</b> | <b>5/28/2014 9:46:00 PM</b> |
|---------------------------------|-------------------|-----------------------------|

No underline, Font color: Auto, English (U.S.)

|                                 |                   |                             |
|---------------------------------|-------------------|-----------------------------|
| <b>Page 27: [718] Formatted</b> | <b>Windows 用户</b> | <b>5/28/2014 9:46:00 PM</b> |
|---------------------------------|-------------------|-----------------------------|

No underline, Font color: Auto, English (U.S.)

1  
2  
3  
4  
5  
6  
7  
8  
9  
10  
11 **Page 27: [719] Formatted** Windows 用户 5/28/2014 9:46:00 PM

12 No underline, Font color: Auto, English (U.S.)

13  
14 **Page 27: [719] Formatted** Windows 用户 5/28/2014 9:46:00 PM

15 No underline, Font color: Auto, English (U.S.)

16  
17 **Page 27: [720] Formatted** Windows 用户 5/28/2014 9:46:00 PM

18 No underline, Font color: Auto, English (U.S.)

19  
20 **Page 27: [720] Formatted** Windows 用户 5/28/2014 9:46:00 PM

21 No underline, Font color: Auto, English (U.S.)

22  
23 **Page 27: [721] Formatted** Windows 用户 5/28/2014 9:46:00 PM

24 No underline, Font color: Auto, English (U.S.)

25  
26 **Page 27: [721] Formatted** Windows 用户 5/28/2014 9:46:00 PM

27 No underline, Font color: Auto, English (U.S.)

28  
29 **Page 27: [722] Formatted** Windows 用户 5/28/2014 9:46:00 PM

30 No underline, Font color: Auto, English (U.S.)

31  
32 **Page 27: [722] Formatted** Windows 用户 5/28/2014 9:46:00 PM

33 No underline, Font color: Auto, English (U.S.)

34  
35 **Page 27: [723] Formatted** Windows 用户 5/28/2014 9:46:00 PM

36 No underline, Font color: Auto, English (U.S.)

37  
38 **Page 27: [723] Formatted** Windows 用户 5/28/2014 9:46:00 PM

39 No underline, Font color: Auto, English (U.S.)

40  
41 **Page 27: [724] Formatted** Windows 用户 5/28/2014 9:46:00 PM

42 No underline, Font color: Auto, English (U.S.)

43  
44 **Page 27: [724] Formatted** Windows 用户 5/28/2014 9:46:00 PM

45 No underline, Font color: Auto, English (U.S.)

46  
47 **Page 27: [725] Formatted** Windows 用户 5/28/2014 9:46:00 PM

48 No underline, Font color: Auto, English (U.S.)

49  
50 **Page 27: [725] Formatted** Windows 用户 5/28/2014 9:46:00 PM

51 No underline, Font color: Auto, English (U.S.)

52  
53 **Page 27: [726] Formatted** Windows 用户 5/28/2014 9:46:00 PM

54 No underline, Font color: Auto, English (U.S.)

55  
56 **Page 27: [726] Formatted** Windows 用户 5/28/2014 9:46:00 PM

57 No underline, Font color: Auto, English (U.S.)

58  
59 **Page 27: [727] Formatted** Windows 用户 5/28/2014 9:46:00 PM

60 No underline, Font color: Auto, English (U.S.)

**Page 27: [727] Formatted** Windows 用户 5/28/2014 9:46:00 PM

No underline, Font color: Auto, English (U.S.)

**Page 27: [728] Formatted** Windows 用户 5/28/2014 9:46:00 PM

No underline, Font color: Auto, English (U.S.)

1  
2  
3  
4  
5  
6  
7  
8  
9  
10  
11 **Page 27: [728] Formatted** Windows 用户 5/28/2014 9:46:00 PM

12 No underline, Font color: Auto, English (U.S.)

13  
14 **Page 27: [729] Formatted** Windows 用户 5/28/2014 9:46:00 PM

15 No underline, Font color: Auto, English (U.S.)

16  
17 **Page 27: [729] Formatted** Windows 用户 5/28/2014 9:46:00 PM

18 No underline, Font color: Auto, English (U.S.)

19  
20 **Page 27: [730] Formatted** Windows 用户 5/28/2014 9:46:00 PM

21 No underline, Font color: Auto, English (U.S.)

22  
23 **Page 27: [730] Formatted** Windows 用户 5/28/2014 9:46:00 PM

24 No underline, Font color: Auto, English (U.S.)

25  
26 **Page 27: [731] Formatted** Windows 用户 5/28/2014 9:46:00 PM

27 No underline, Font color: Auto, English (U.S.)

28  
29 **Page 27: [731] Formatted** Windows 用户 5/28/2014 9:46:00 PM

30 No underline, Font color: Auto, English (U.S.)

31  
32 **Page 27: [732] Formatted** Windows 用户 5/28/2014 9:46:00 PM

33 No underline, Font color: Auto, English (U.S.)

34  
35 **Page 27: [732] Formatted** Windows 用户 5/28/2014 9:46:00 PM

36 No underline, Font color: Auto, English (U.S.)

37  
38 **Page 27: [733] Formatted** Windows 用户 5/28/2014 9:46:00 PM

39 No underline, Font color: Auto, English (U.S.)

40  
41 **Page 27: [733] Formatted** Windows 用户 5/28/2014 9:46:00 PM

42 No underline, Font color: Auto, English (U.S.)

43  
44 **Page 27: [734] Formatted** Windows 用户 5/28/2014 9:46:00 PM

45 No underline, Font color: Auto, English (U.S.)

46  
47 **Page 27: [734] Formatted** Windows 用户 5/28/2014 9:46:00 PM

48 No underline, Font color: Auto, English (U.S.)

49  
50 **Page 27: [735] Formatted** Windows 用户 5/28/2014 9:46:00 PM

51 No underline, Font color: Auto, English (U.S.)

52  
53 **Page 27: [735] Formatted** Windows 用户 5/28/2014 9:46:00 PM

54 No underline, Font color: Auto, English (U.S.)

55  
56 **Page 27: [736] Formatted** Windows 用户 5/28/2014 9:46:00 PM

57 No underline, Font color: Auto, English (U.S.)

58  
59 **Page 27: [736] Formatted** Windows 用户 5/28/2014 9:46:00 PM

60 No underline, Font color: Auto, English (U.S.)

**Page 27: [737] Formatted** Windows 用户 5/28/2014 9:46:00 PM

No underline, Font color: Auto, English (U.S.)

**Page 27: [737] Formatted** Windows 用户 5/28/2014 9:46:00 PM

No underline, Font color: Auto, English (U.S.)

1  
2  
3  
4  
5  
6  
7  
8  
9  
10  
11 **Page 27: [738] Formatted** Windows 用户 5/28/2014 9:46:00 PM

12 No underline, Font color: Auto, English (U.S.)

13  
14 **Page 27: [738] Formatted** Windows 用户 5/28/2014 9:46:00 PM

15 No underline, Font color: Auto, English (U.S.)

16  
17 **Page 27: [739] Formatted** Windows 用户 5/28/2014 9:46:00 PM

18 No underline, Font color: Auto, English (U.S.)

19  
20 **Page 27: [739] Formatted** Windows 用户 5/28/2014 9:46:00 PM

21 No underline, Font color: Auto, English (U.S.)

22  
23 **Page 27: [740] Formatted** Windows 用户 5/28/2014 9:46:00 PM

24 No underline, Font color: Auto, English (U.S.)

25  
26 **Page 27: [740] Formatted** Windows 用户 5/28/2014 9:46:00 PM

27 No underline, Font color: Auto, English (U.S.)

28  
29 **Page 27: [741] Formatted** Windows 用户 5/28/2014 9:46:00 PM

30 No underline, Font color: Auto, English (U.S.)

31  
32 **Page 27: [741] Formatted** Windows 用户 5/28/2014 9:46:00 PM

33 No underline, Font color: Auto, English (U.S.)

34  
35 **Page 27: [742] Formatted** Windows 用户 5/28/2014 9:46:00 PM

36 No underline, Font color: Auto, English (U.S.)

37  
38 **Page 27: [742] Formatted** Windows 用户 5/28/2014 9:46:00 PM

39 No underline, Font color: Auto, English (U.S.)

40  
41 **Page 27: [743] Formatted** Windows 用户 5/28/2014 9:46:00 PM

42 No underline, Font color: Auto, English (U.S.)

43  
44 **Page 27: [743] Formatted** Windows 用户 5/28/2014 9:46:00 PM

45 No underline, Font color: Auto, English (U.S.)

46  
47 **Page 27: [744] Formatted** Windows 用户 5/28/2014 9:46:00 PM

48 No underline, Font color: Auto, English (U.S.)

49  
50 **Page 27: [744] Formatted** Windows 用户 5/28/2014 9:46:00 PM

51 No underline, Font color: Auto, English (U.S.)

52  
53 **Page 27: [745] Formatted** Windows 用户 5/28/2014 9:46:00 PM

54 No underline, Font color: Auto, English (U.S.)

55  
56 **Page 27: [745] Formatted** Windows 用户 5/28/2014 9:46:00 PM

57 No underline, Font color: Auto, English (U.S.)

58  
59 **Page 27: [746] Formatted** Windows 用户 5/28/2014 9:46:00 PM

60 No underline, Font color: Auto, English (U.S.)

**Page 27: [746] Formatted** Windows 用户 5/28/2014 9:46:00 PM

No underline, Font color: Auto, English (U.S.)

**Page 27: [747] Formatted** Windows 用户 5/28/2014 9:46:00 PM

No underline, Font color: Auto, English (U.S.)



1  
2  
3  
4  
5  
6  
7  
8  
9  
10  
11 **Page 27: [747] Formatted** Windows 用户 5/28/2014 9:46:00 PM

12 No underline, Font color: Auto, English (U.S.)

13  
14 **Page 27: [748] Formatted** Windows 用户 5/28/2014 9:46:00 PM

15 No underline, Font color: Auto, English (U.S.)

16  
17 **Page 27: [748] Formatted** Windows 用户 5/28/2014 9:46:00 PM

18 No underline, Font color: Auto, English (U.S.)

19  
20 **Page 27: [749] Formatted** Windows 用户 5/28/2014 9:46:00 PM

21 No underline, Font color: Auto, English (U.S.)

22  
23 **Page 27: [749] Formatted** Windows 用户 5/28/2014 9:46:00 PM

24 No underline, Font color: Auto, English (U.S.)

25  
26 **Page 27: [750] Formatted** Windows 用户 5/28/2014 9:46:00 PM

27 No underline, Font color: Auto, English (U.S.)

28  
29 **Page 27: [750] Formatted** Windows 用户 5/28/2014 9:46:00 PM

30 No underline, Font color: Auto, English (U.S.)

31  
32 **Page 27: [751] Formatted** Windows 用户 5/28/2014 9:46:00 PM

33 No underline, Font color: Auto, English (U.S.)

34  
35 **Page 27: [751] Formatted** Windows 用户 5/28/2014 9:46:00 PM

36 No underline, Font color: Auto, English (U.S.)

37  
38 **Page 27: [752] Formatted** Windows 用户 5/28/2014 9:46:00 PM

39 No underline, Font color: Auto, English (U.S.)

40  
41 **Page 27: [752] Formatted** Windows 用户 5/28/2014 9:46:00 PM

42 No underline, Font color: Auto, English (U.S.)

43  
44 **Page 27: [753] Formatted** Windows 用户 5/28/2014 9:46:00 PM

45 No underline, Font color: Auto, English (U.S.)

46  
47 **Page 27: [753] Formatted** Windows 用户 5/28/2014 9:46:00 PM

48 No underline, Font color: Auto, English (U.S.)

49  
50 **Page 27: [754] Formatted** Windows 用户 5/28/2014 9:46:00 PM

51 No underline, Font color: Auto, English (U.S.)

52  
53 **Page 27: [754] Formatted** Windows 用户 5/28/2014 9:46:00 PM

54 No underline, Font color: Auto, English (U.S.)

55  
56 **Page 27: [755] Formatted** Windows 用户 5/28/2014 9:46:00 PM

57 No underline, Font color: Auto, English (U.S.)

58  
59 **Page 27: [755] Formatted** Windows 用户 5/28/2014 9:46:00 PM

60 No underline, Font color: Auto, English (U.S.)

**Page 27: [756] Formatted** Windows 用户 5/28/2014 9:46:00 PM

No underline, Font color: Auto, English (U.S.)

**Page 27: [756] Formatted** Windows 用户 5/28/2014 9:46:00 PM

No underline, Font color: Auto, English (U.S.)



1  
2  
3  
4  
5  
6  
7  
8  
9  
10  
11 **Page 27: [757] Formatted** Windows 用户 5/28/2014 9:46:00 PM

12 No underline, Font color: Auto, English (U.S.)

13 **Page 27: [757] Formatted** Windows 用户 5/28/2014 9:46:00 PM

14 No underline, Font color: Auto, English (U.S.)

15 **Page 27: [758] Formatted** Windows 用户 5/28/2014 9:46:00 PM

16 No underline, Font color: Auto, English (U.S.)

17 **Page 27: [758] Formatted** Windows 用户 5/28/2014 9:46:00 PM

18 No underline, Font color: Auto, English (U.S.)

19 **Page 27: [759] Formatted** Windows 用户 5/28/2014 9:46:00 PM

20 No underline, Font color: Auto, English (U.S.)

21 **Page 27: [759] Formatted** Windows 用户 5/28/2014 9:46:00 PM

22 No underline, Font color: Auto, English (U.S.)

23 **Page 27: [760] Formatted** Windows 用户 5/28/2014 9:46:00 PM

24 No underline, Font color: Auto, English (U.S.)

25 **Page 27: [760] Formatted** Windows 用户 5/28/2014 9:46:00 PM

26 No underline, Font color: Auto, English (U.S.)

27 **Page 27: [761] Formatted** Windows 用户 5/28/2014 9:46:00 PM

28 No underline, Font color: Auto, English (U.S.)

29 **Page 27: [761] Formatted** Windows 用户 5/28/2014 9:46:00 PM

30 No underline, Font color: Auto, English (U.S.)

31 **Page 27: [762] Formatted** Windows 用户 5/28/2014 9:46:00 PM

32 No underline, Font color: Auto, English (U.S.)

33 **Page 27: [762] Formatted** Windows 用户 5/28/2014 9:46:00 PM

34 No underline, Font color: Auto, English (U.S.)

35 **Page 27: [763] Formatted** Windows 用户 5/28/2014 9:46:00 PM

36 No underline, Font color: Auto, English (U.S.)

37 **Page 27: [763] Formatted** Windows 用户 5/28/2014 9:46:00 PM

38 No underline, Font color: Auto, English (U.S.)

39 **Page 27: [764] Formatted** Windows 用户 5/28/2014 9:46:00 PM

40 No underline, Font color: Auto, English (U.S.)

41 **Page 27: [764] Formatted** Windows 用户 5/28/2014 9:46:00 PM

42 No underline, Font color: Auto, English (U.S.)

43 **Page 27: [765] Formatted** Windows 用户 5/28/2014 9:46:00 PM

44 No underline, Font color: Auto, English (U.S.)

45 **Page 27: [765] Formatted** Windows 用户 5/28/2014 9:46:00 PM

46 No underline, Font color: Auto, English (U.S.)

47 **Page 27: [766] Formatted** Windows 用户 5/28/2014 9:46:00 PM

48 No underline, Font color: Auto, English (U.S.)

1  
2  
3  
4  
5  
6  
7  
8  
9  
10  
11  
12  
13  
14  
15  
16  
17  
18  
19  
20  
21  
22  
23  
24  
25  
26  
27  
28  
29  
30  
31  
32  
33  
34  
35  
36  
37  
38  
39  
40  
41  
42  
43  
44  
45  
46  
47  
48  
49  
50  
51  
52  
53  
54  
55  
56  
57  
58  
59  
60

**Page 27: [766] Formatted** Windows 用户 5/28/2014 9:46:00 PM

No underline, Font color: Auto, English (U.S.)

**Page 27: [767] Formatted** Windows 用户 5/28/2014 9:46:00 PM

No underline, Font color: Auto, English (U.S.)

**Page 27: [767] Formatted** Windows 用户 5/28/2014 9:46:00 PM

No underline, Font color: Auto, English (U.S.)

**Page 27: [768] Formatted** Windows 用户 5/28/2014 9:46:00 PM

No underline, Font color: Auto, English (U.S.)

**Page 27: [768] Formatted** Windows 用户 5/28/2014 9:46:00 PM

No underline, Font color: Auto, English (U.S.)

**Page 27: [769] Formatted** Windows 用户 5/28/2014 9:46:00 PM

No underline, Font color: Auto, English (U.S.)

**Page 27: [769] Formatted** Windows 用户 5/28/2014 9:46:00 PM

No underline, Font color: Auto, English (U.S.)

**Page 27: [770] Formatted** Windows 用户 5/28/2014 9:46:00 PM

No underline, Font color: Auto, English (U.S.)

**Page 27: [770] Formatted** Windows 用户 5/28/2014 9:46:00 PM

No underline, Font color: Auto, English (U.S.)

**Page 27: [771] Formatted** Windows 用户 5/28/2014 9:46:00 PM

No underline, Font color: Auto, English (U.S.)

**Page 27: [771] Formatted** Windows 用户 5/28/2014 9:46:00 PM

No underline, Font color: Auto, English (U.S.)

**Page 27: [772] Formatted** Windows 用户 5/28/2014 9:46:00 PM

No underline, Font color: Auto, English (U.S.)

**Page 27: [772] Formatted** Windows 用户 5/28/2014 9:46:00 PM

No underline, Font color: Auto, English (U.S.)

**Page 27: [773] Formatted** Windows 用户 5/28/2014 9:46:00 PM

No underline, Font color: Auto, English (U.S.)

**Page 27: [773] Formatted** Windows 用户 5/28/2014 9:46:00 PM

No underline, Font color: Auto, English (U.S.)

**Page 27: [774] Formatted** Windows 用户 5/28/2014 9:46:00 PM

No underline, Font color: Auto, English (U.S.)

**Page 27: [774] Formatted** Windows 用户 5/28/2014 9:46:00 PM

No underline, Font color: Auto, English (U.S.)

**Page 27: [775] Formatted** Windows 用户 5/28/2014 9:46:00 PM

No underline, Font color: Auto, English (U.S.)

**Page 27: [775] Formatted** Windows 用户 5/28/2014 9:46:00 PM

No underline, Font color: Auto, English (U.S.)

1  
2  
3  
4  
5  
6  
7  
8  
9  
10  
11 **Page 27: [776] Formatted** Windows 用户 5/28/2014 9:46:00 PM

12 No underline, Font color: Auto, English (U.S.)

13  
14 **Page 27: [776] Formatted** Windows 用户 5/28/2014 9:46:00 PM

15 No underline, Font color: Auto, English (U.S.)

16  
17 **Page 27: [777] Formatted** Windows 用户 5/28/2014 9:46:00 PM

18 No underline, Font color: Auto, English (U.S.)

19  
20 **Page 27: [777] Formatted** Windows 用户 5/28/2014 9:46:00 PM

21 No underline, Font color: Auto, English (U.S.)

22  
23 **Page 27: [778] Formatted** Windows 用户 5/28/2014 9:46:00 PM

24 No underline, Font color: Auto, English (U.S.)

25  
26 **Page 27: [778] Formatted** Windows 用户 5/28/2014 9:46:00 PM

27 No underline, Font color: Auto, English (U.S.)

28  
29 **Page 27: [779] Formatted** Windows 用户 5/28/2014 9:46:00 PM

30 No underline, Font color: Auto, English (U.S.)

31  
32 **Page 27: [779] Formatted** Windows 用户 5/28/2014 9:46:00 PM

33 No underline, Font color: Auto, English (U.S.)

34  
35 **Page 27: [780] Formatted** Windows 用户 5/28/2014 9:46:00 PM

36 No underline, Font color: Auto, English (U.S.)

37  
38 **Page 27: [780] Formatted** Windows 用户 5/28/2014 9:46:00 PM

39 No underline, Font color: Auto, English (U.S.)

40  
41 **Page 27: [781] Formatted** Windows 用户 5/28/2014 9:46:00 PM

42 No underline, Font color: Auto, English (U.S.)

43  
44 **Page 27: [781] Formatted** Windows 用户 5/28/2014 9:46:00 PM

45 No underline, Font color: Auto, English (U.S.)

46  
47 **Page 27: [782] Formatted** Windows 用户 5/28/2014 9:46:00 PM

48 No underline, Font color: Auto, English (U.S.)

49  
50 **Page 27: [782] Formatted** Windows 用户 5/28/2014 9:46:00 PM

51 No underline, Font color: Auto, English (U.S.)

52  
53 **Page 27: [783] Formatted** Windows 用户 5/28/2014 9:46:00 PM

54 No underline, Font color: Auto, English (U.S.)

55  
56 **Page 27: [783] Formatted** Windows 用户 5/28/2014 9:46:00 PM

57 No underline, Font color: Auto, English (U.S.)

58  
59 **Page 27: [784] Formatted** Windows 用户 5/28/2014 9:46:00 PM

60 No underline, Font color: Auto, English (U.S.)

**Page 27: [784] Formatted** Windows 用户 5/28/2014 9:46:00 PM

No underline, Font color: Auto, English (U.S.)

**Page 27: [785] Formatted** Windows 用户 5/28/2014 9:46:00 PM

No underline, Font color: Auto, English (U.S.)

1  
2  
3  
4  
5  
6  
7  
8  
9  
10  
11 **Page 27: [785] Formatted** Windows 用户 5/28/2014 9:46:00 PM

12 No underline, Font color: Auto, English (U.S.)

13  
14 **Page 27: [786] Formatted** Windows 用户 5/28/2014 9:46:00 PM

15 No underline, Font color: Auto, English (U.S.)

16  
17 **Page 27: [786] Formatted** Windows 用户 5/28/2014 9:46:00 PM

18 No underline, Font color: Auto, English (U.S.)

19  
20 **Page 27: [787] Formatted** Windows 用户 5/28/2014 9:46:00 PM

21 No underline, Font color: Auto, English (U.S.)

22  
23 **Page 27: [787] Formatted** Windows 用户 5/28/2014 9:46:00 PM

24 No underline, Font color: Auto, English (U.S.)

25  
26 **Page 27: [788] Formatted** Windows 用户 5/28/2014 9:46:00 PM

27 No underline, Font color: Auto, English (U.S.)

28  
29 **Page 27: [788] Formatted** Windows 用户 5/28/2014 9:46:00 PM

30 No underline, Font color: Auto, English (U.S.)

31  
32 **Page 27: [789] Formatted** Windows 用户 5/28/2014 9:46:00 PM

33 No underline, Font color: Auto, English (U.S.)

34  
35 **Page 27: [789] Formatted** Windows 用户 5/28/2014 9:46:00 PM

36 No underline, Font color: Auto, English (U.S.)

37  
38 **Page 27: [790] Formatted** Windows 用户 5/28/2014 9:46:00 PM

39 No underline, Font color: Auto, English (U.S.)

40  
41 **Page 27: [790] Formatted** Windows 用户 5/28/2014 9:46:00 PM

42 No underline, Font color: Auto, English (U.S.)

43  
44 **Page 27: [791] Formatted** Windows 用户 5/28/2014 9:46:00 PM

45 No underline, Font color: Auto, English (U.S.)

46  
47 **Page 27: [791] Formatted** Windows 用户 5/28/2014 9:46:00 PM

48 No underline, Font color: Auto, English (U.S.)

49  
50 **Page 27: [792] Formatted** Windows 用户 5/28/2014 9:46:00 PM

51 No underline, Font color: Auto, English (U.S.)

52  
53 **Page 27: [792] Formatted** Windows 用户 5/28/2014 9:46:00 PM

54 No underline, Font color: Auto, English (U.S.)

55  
56 **Page 27: [793] Formatted** Windows 用户 5/28/2014 9:46:00 PM

57 No underline, Font color: Auto, English (U.S.)

58  
59 **Page 27: [793] Formatted** Windows 用户 5/28/2014 9:46:00 PM

60 No underline, Font color: Auto, English (U.S.)

**Page 27: [794] Formatted** Windows 用户 5/28/2014 9:46:00 PM

No underline, Font color: Auto, English (U.S.)

**Page 27: [794] Formatted** Windows 用户 5/28/2014 9:46:00 PM

No underline, Font color: Auto, English (U.S.)

1  
2  
3  
4  
5  
6  
7  
8  
9  
10  
11 **Page 27: [795] Formatted** Windows 用户 5/28/2014 9:46:00 PM

12 No underline, Font color: Auto, English (U.S.)

13 **Page 27: [795] Formatted** Windows 用户 5/28/2014 9:46:00 PM

14 No underline, Font color: Auto, English (U.S.)

15 **Page 27: [796] Formatted** Windows 用户 5/28/2014 9:46:00 PM

16 No underline, Font color: Auto, English (U.S.)

17 **Page 27: [796] Formatted** Windows 用户 5/28/2014 9:46:00 PM

18 No underline, Font color: Auto, English (U.S.)

19 **Page 27: [797] Formatted** Windows 用户 5/28/2014 9:46:00 PM

20 No underline, Font color: Auto, English (U.S.)

21 **Page 27: [797] Formatted** Windows 用户 5/28/2014 9:46:00 PM

22 No underline, Font color: Auto, English (U.S.)

23 **Page 27: [798] Formatted** Windows 用户 5/28/2014 9:46:00 PM

24 No underline, Font color: Auto, English (U.S.)

25 **Page 27: [798] Formatted** Windows 用户 5/28/2014 9:46:00 PM

26 No underline, Font color: Auto, English (U.S.)

27 **Page 27: [799] Formatted** Windows 用户 5/28/2014 9:46:00 PM

28 No underline, Font color: Auto, English (U.S.)

29 **Page 27: [799] Formatted** Windows 用户 5/28/2014 9:46:00 PM

30 No underline, Font color: Auto, English (U.S.)

31 **Page 27: [800] Formatted** Windows 用户 5/28/2014 9:46:00 PM

32 No underline, Font color: Auto, English (U.S.)

33 **Page 27: [800] Formatted** Windows 用户 5/28/2014 9:46:00 PM

34 No underline, Font color: Auto, English (U.S.)

35 **Page 27: [801] Formatted** Windows 用户 5/28/2014 9:46:00 PM

36 No underline, Font color: Auto, English (U.S.)

37 **Page 27: [801] Formatted** Windows 用户 5/28/2014 9:46:00 PM

38 No underline, Font color: Auto, English (U.S.)

39 **Page 27: [802] Formatted** Windows 用户 5/28/2014 9:46:00 PM

40 No underline, Font color: Auto, English (U.S.)

41 **Page 27: [802] Formatted** Windows 用户 5/28/2014 9:46:00 PM

42 No underline, Font color: Auto, English (U.S.)

43 **Page 27: [803] Formatted** Windows 用户 5/28/2014 9:46:00 PM

44 No underline, Font color: Auto, English (U.S.)

45 **Page 27: [803] Formatted** Windows 用户 5/28/2014 9:46:00 PM

46 No underline, Font color: Auto, English (U.S.)

47 **Page 27: [804] Formatted** Windows 用户 5/28/2014 9:46:00 PM

48 No underline, Font color: Auto, English (U.S.)

1  
2  
3  
4  
5  
6  
7  
8  
9  
10  
11 **Page 27: [804] Formatted** Windows 用户 5/28/2014 9:46:00 PM

12 No underline, Font color: Auto, English (U.S.)

13  
14 **Page 27: [805] Formatted** Windows 用户 5/28/2014 9:46:00 PM

15 No underline, Font color: Auto, English (U.S.)

16  
17 **Page 27: [805] Formatted** Windows 用户 5/28/2014 9:46:00 PM

18 No underline, Font color: Auto, English (U.S.)

19  
20 **Page 27: [806] Formatted** Windows 用户 5/28/2014 9:46:00 PM

21 No underline, Font color: Auto, English (U.S.)

22  
23 **Page 27: [806] Formatted** Windows 用户 5/28/2014 9:46:00 PM

24 No underline, Font color: Auto, English (U.S.)

25  
26 **Page 27: [807] Formatted** Windows 用户 5/28/2014 9:46:00 PM

27 No underline, Font color: Auto, English (U.S.)

28  
29 **Page 27: [807] Formatted** Windows 用户 5/28/2014 9:46:00 PM

30 No underline, Font color: Auto, English (U.S.)

31  
32 **Page 27: [808] Formatted** Windows 用户 5/28/2014 9:46:00 PM

33 No underline, Font color: Auto, English (U.S.)

34  
35 **Page 27: [808] Formatted** Windows 用户 5/28/2014 9:46:00 PM

36 No underline, Font color: Auto, English (U.S.)

37  
38 **Page 27: [809] Formatted** Windows 用户 5/28/2014 9:46:00 PM

39 No underline, Font color: Auto, English (U.S.)

40  
41 **Page 27: [809] Formatted** Windows 用户 5/28/2014 9:46:00 PM

42 No underline, Font color: Auto, English (U.S.)

43  
44 **Page 27: [810] Formatted** Windows 用户 5/28/2014 9:46:00 PM

45 No underline, Font color: Auto, English (U.S.)

46  
47 **Page 27: [810] Formatted** Windows 用户 5/28/2014 9:46:00 PM

48 No underline, Font color: Auto, English (U.S.)

49  
50 **Page 27: [811] Formatted** Windows 用户 5/28/2014 9:46:00 PM

51 No underline, Font color: Auto, English (U.S.)

52  
53 **Page 27: [811] Formatted** Windows 用户 5/28/2014 9:46:00 PM

54 No underline, Font color: Auto, English (U.S.)

55  
56 **Page 27: [812] Formatted** Windows 用户 5/28/2014 9:46:00 PM

57 No underline, Font color: Auto, English (U.S.)

58  
59 **Page 27: [812] Formatted** Windows 用户 5/28/2014 9:46:00 PM

60 No underline, Font color: Auto, English (U.S.)

**Page 27: [813] Formatted** Windows 用户 5/28/2014 9:46:00 PM

No underline, Font color: Auto, English (U.S.)

**Page 27: [813] Formatted** Windows 用户 5/28/2014 9:46:00 PM

No underline, Font color: Auto, English (U.S.)

1  
2  
3  
4  
5  
6  
7  
8  
9  
10  
11 **Page 27: [814] Formatted** Windows 用户 5/28/2014 9:46:00 PM

12 No underline, Font color: Auto, English (U.S.)

13  
14 **Page 27: [814] Formatted** Windows 用户 5/28/2014 9:46:00 PM

15 No underline, Font color: Auto, English (U.S.)

16  
17 **Page 27: [815] Formatted** Windows 用户 5/28/2014 9:46:00 PM

18 No underline, Font color: Auto, English (U.S.)

19  
20 **Page 27: [815] Formatted** Windows 用户 5/28/2014 9:46:00 PM

21 No underline, Font color: Auto, English (U.S.)

22  
23 **Page 27: [816] Formatted** Windows 用户 5/28/2014 9:46:00 PM

24 No underline, Font color: Auto, English (U.S.)

25  
26 **Page 27: [816] Formatted** Windows 用户 5/28/2014 9:46:00 PM

27 No underline, Font color: Auto, English (U.S.)

28  
29 **Page 27: [817] Formatted** Windows 用户 5/28/2014 9:46:00 PM

30 No underline, Font color: Auto, English (U.S.)

31  
32 **Page 27: [817] Formatted** Windows 用户 5/28/2014 9:46:00 PM

33 No underline, Font color: Auto, English (U.S.)

34  
35 **Page 27: [818] Formatted** Windows 用户 5/28/2014 9:46:00 PM

36 No underline, Font color: Auto, English (U.S.)

37  
38 **Page 27: [818] Formatted** Windows 用户 5/28/2014 9:46:00 PM

39 No underline, Font color: Auto, English (U.S.)

40  
41 **Page 27: [819] Formatted** Windows 用户 5/28/2014 9:46:00 PM

42 No underline, Font color: Auto, English (U.S.)

43  
44 **Page 27: [819] Formatted** Windows 用户 5/28/2014 9:46:00 PM

45 No underline, Font color: Auto, English (U.S.)

46  
47 **Page 27: [820] Formatted** Windows 用户 5/28/2014 9:46:00 PM

48 No underline, Font color: Auto, English (U.S.)

49  
50 **Page 27: [820] Formatted** Windows 用户 5/28/2014 9:46:00 PM

51 No underline, Font color: Auto, English (U.S.)

52  
53 **Page 27: [821] Formatted** Windows 用户 5/28/2014 9:46:00 PM

54 No underline, Font color: Auto, English (U.S.)

55  
56 **Page 27: [821] Formatted** Windows 用户 5/28/2014 9:46:00 PM

57 No underline, Font color: Auto, English (U.S.)

58  
59 **Page 27: [822] Formatted** Windows 用户 5/28/2014 9:46:00 PM

60 No underline, Font color: Auto, English (U.S.)

**Page 27: [822] Formatted** Windows 用户 5/28/2014 9:46:00 PM

No underline, Font color: Auto, English (U.S.)

**Page 27: [823] Formatted** Windows 用户 5/28/2014 9:46:00 PM

No underline, Font color: Auto, English (U.S.)



1  
2  
3  
4  
5  
6  
7  
8  
9  
10  
11 **Page 27: [823] Formatted** Windows 用户 5/28/2014 9:46:00 PM

12 No underline, Font color: Auto, English (U.S.)

13  
14 **Page 27: [824] Formatted** Windows 用户 5/28/2014 9:46:00 PM

15 No underline, Font color: Auto, English (U.S.)

16  
17 **Page 27: [824] Formatted** Windows 用户 5/28/2014 9:46:00 PM

18 No underline, Font color: Auto, English (U.S.)

19  
20 **Page 27: [825] Formatted** Windows 用户 5/28/2014 9:46:00 PM

21 No underline, Font color: Auto, English (U.S.)

22  
23 **Page 27: [825] Formatted** Windows 用户 5/28/2014 9:46:00 PM

24 No underline, Font color: Auto, English (U.S.)

25  
26 **Page 27: [826] Formatted** Windows 用户 5/28/2014 9:46:00 PM

27 No underline, Font color: Auto, English (U.S.)

28  
29 **Page 27: [826] Formatted** Windows 用户 5/28/2014 9:46:00 PM

30 No underline, Font color: Auto, English (U.S.)

31  
32 **Page 27: [827] Formatted** Windows 用户 5/28/2014 9:46:00 PM

33 No underline, Font color: Auto, English (U.S.)

34  
35 **Page 27: [827] Formatted** Windows 用户 5/28/2014 9:46:00 PM

36 No underline, Font color: Auto, English (U.S.)

37  
38 **Page 27: [828] Formatted** Windows 用户 5/28/2014 9:46:00 PM

39 No underline, Font color: Auto, English (U.S.)

40  
41 **Page 27: [828] Formatted** Windows 用户 5/28/2014 9:46:00 PM

42 No underline, Font color: Auto, English (U.S.)

43  
44 **Page 27: [829] Formatted** Windows 用户 5/28/2014 9:46:00 PM

45 No underline, Font color: Auto, English (U.S.)

46  
47 **Page 27: [829] Formatted** Windows 用户 5/28/2014 9:46:00 PM

48 No underline, Font color: Auto, English (U.S.)

49  
50 **Page 27: [830] Formatted** Windows 用户 5/28/2014 9:46:00 PM

51 No underline, Font color: Auto, English (U.S.)

52  
53 **Page 27: [830] Formatted** Windows 用户 5/28/2014 9:46:00 PM

54 No underline, Font color: Auto, English (U.S.)

55  
56 **Page 27: [831] Formatted** Windows 用户 5/28/2014 9:46:00 PM

57 No underline, Font color: Auto, English (U.S.)

58  
59 **Page 27: [831] Formatted** Windows 用户 5/28/2014 9:46:00 PM

60 No underline, Font color: Auto, English (U.S.)

**Page 27: [832] Formatted** Windows 用户 5/28/2014 9:46:00 PM

No underline, Font color: Auto, English (U.S.)

**Page 27: [832] Formatted** Windows 用户 5/28/2014 9:46:00 PM

No underline, Font color: Auto, English (U.S.)

1  
2  
3  
4  
5  
6  
7  
8  
9  
10  
11 **Page 27: [833] Formatted** Windows 用户 5/28/2014 9:46:00 PM

12 No underline, Font color: Auto, English (U.S.)

13  
14 **Page 27: [833] Formatted** Windows 用户 5/28/2014 9:46:00 PM

15 No underline, Font color: Auto, English (U.S.)

16  
17 **Page 27: [834] Formatted** Windows 用户 5/28/2014 9:46:00 PM

18 No underline, Font color: Auto, English (U.S.)

19  
20 **Page 27: [834] Formatted** Windows 用户 5/28/2014 9:46:00 PM

21 No underline, Font color: Auto, English (U.S.)

22  
23 **Page 27: [835] Formatted** Windows 用户 5/28/2014 9:46:00 PM

24 No underline, Font color: Auto, English (U.S.)

25  
26 **Page 27: [835] Formatted** Windows 用户 5/28/2014 9:46:00 PM

27 No underline, Font color: Auto, English (U.S.)

28  
29 **Page 27: [836] Formatted** Windows 用户 5/28/2014 9:46:00 PM

30 No underline, Font color: Auto, English (U.S.)

31  
32 **Page 27: [836] Formatted** Windows 用户 5/28/2014 9:46:00 PM

33 No underline, Font color: Auto, English (U.S.)

34  
35 **Page 27: [837] Formatted** Windows 用户 5/28/2014 9:46:00 PM

36 No underline, Font color: Auto, English (U.S.)

37  
38 **Page 27: [837] Formatted** Windows 用户 5/28/2014 9:46:00 PM

39 No underline, Font color: Auto, English (U.S.)

40  
41 **Page 27: [838] Formatted** Windows 用户 5/28/2014 9:46:00 PM

42 No underline, Font color: Auto, English (U.S.)

43  
44 **Page 27: [838] Formatted** Windows 用户 5/28/2014 9:46:00 PM

45 No underline, Font color: Auto, English (U.S.)

46  
47 **Page 27: [839] Formatted** Windows 用户 5/28/2014 9:46:00 PM

48 No underline, Font color: Auto, English (U.S.)

49  
50 **Page 27: [839] Formatted** Windows 用户 5/28/2014 9:46:00 PM

51 No underline, Font color: Auto, English (U.S.)

52  
53 **Page 27: [840] Formatted** Windows 用户 5/28/2014 9:46:00 PM

54 No underline, Font color: Auto, English (U.S.)

55  
56 **Page 27: [840] Formatted** Windows 用户 5/28/2014 9:46:00 PM

57 No underline, Font color: Auto, English (U.S.)

58  
59 **Page 27: [841] Formatted** Windows 用户 5/28/2014 9:46:00 PM

60 No underline, Font color: Auto, English (U.S.)

**Page 27: [841] Formatted** Windows 用户 5/28/2014 9:46:00 PM

No underline, Font color: Auto, English (U.S.)

**Page 27: [842] Formatted** Windows 用户 5/28/2014 9:46:00 PM

No underline, Font color: Auto, English (U.S.)

1  
2  
3  
4  
5  
6  
7  
8  
9  
10  
11  
12  
13  
14  
15  
16  
17  
18  
19  
20  
21  
22  
23  
24  
25  
26  
27  
28  
29  
30  
31  
32  
33  
34  
35  
36  
37  
38  
39  
40  
41  
42  
43  
44  
45  
46  
47  
48  
49  
50  
51  
52  
53  
54  
55  
56  
57  
58  
59  
60

**Page 27: [842] Formatted** Windows 用户 5/28/2014 9:46:00 PM

No underline, Font color: Auto, English (U.S.)

**Page 27: [843] Formatted** Windows 用户 5/28/2014 9:46:00 PM

No underline, Font color: Auto, English (U.S.)

**Page 27: [843] Formatted** Windows 用户 5/28/2014 9:46:00 PM

No underline, Font color: Auto, English (U.S.)

**Page 27: [844] Formatted** Windows 用户 5/28/2014 9:46:00 PM

No underline, Font color: Auto, English (U.S.)

**Page 27: [844] Formatted** Windows 用户 5/28/2014 9:46:00 PM

No underline, Font color: Auto, English (U.S.)

**Page 27: [845] Formatted** Windows 用户 5/28/2014 9:46:00 PM

No underline, Font color: Auto, English (U.S.)

**Page 27: [845] Formatted** Windows 用户 5/28/2014 9:46:00 PM

No underline, Font color: Auto, English (U.S.)

**Page 27: [846] Formatted** Windows 用户 5/28/2014 9:46:00 PM

No underline, Font color: Auto, English (U.S.)

**Page 27: [846] Formatted** Windows 用户 5/28/2014 9:46:00 PM

No underline, Font color: Auto, English (U.S.)

**Page 27: [847] Formatted** Windows 用户 5/28/2014 9:46:00 PM

No underline, Font color: Auto, English (U.S.)

**Page 27: [847] Formatted** Windows 用户 5/28/2014 9:46:00 PM

No underline, Font color: Auto, English (U.S.)

**Page 27: [848] Formatted** Windows 用户 5/28/2014 9:46:00 PM

No underline, Font color: Auto, English (U.S.)

**Page 27: [848] Formatted** Windows 用户 5/28/2014 9:46:00 PM

No underline, Font color: Auto, English (U.S.)

**Page 27: [849] Formatted** Windows 用户 5/28/2014 9:46:00 PM

No underline, Font color: Auto, English (U.S.)

**Page 27: [849] Formatted** Windows 用户 5/28/2014 9:46:00 PM

No underline, Font color: Auto, English (U.S.)

**Page 27: [850] Formatted** Windows 用户 5/28/2014 9:46:00 PM

No underline, Font color: Auto, English (U.S.)

**Page 27: [850] Formatted** Windows 用户 5/28/2014 9:46:00 PM

No underline, Font color: Auto, English (U.S.)

**Page 27: [851] Formatted** Windows 用户 5/28/2014 9:46:00 PM

No underline, Font color: Auto, English (U.S.)

**Page 27: [851] Formatted** Windows 用户 5/28/2014 9:46:00 PM

No underline, Font color: Auto, English (U.S.)

1  
2  
3  
4  
5  
6  
7  
8  
9  
10  
11 **Page 27: [852] Formatted** Windows 用户 5/28/2014 9:46:00 PM

12 No underline, Font color: Auto, English (U.S.)

13 **Page 27: [852] Formatted** Windows 用户 5/28/2014 9:46:00 PM

14 No underline, Font color: Auto, English (U.S.)

15 **Page 27: [853] Formatted** Windows 用户 5/28/2014 9:46:00 PM

16 No underline, Font color: Auto, English (U.S.)

17 **Page 27: [853] Formatted** Windows 用户 5/28/2014 9:46:00 PM

18 No underline, Font color: Auto, English (U.S.)

19 **Page 27: [854] Formatted** Windows 用户 5/28/2014 9:46:00 PM

20 No underline, Font color: Auto, English (U.S.)

21 **Page 27: [854] Formatted** Windows 用户 5/28/2014 9:46:00 PM

22 No underline, Font color: Auto, English (U.S.)

23 **Page 27: [855] Formatted** Windows 用户 5/28/2014 9:46:00 PM

24 No underline, Font color: Auto, English (U.S.)

25 **Page 27: [855] Formatted** Windows 用户 5/28/2014 9:46:00 PM

26 No underline, Font color: Auto, English (U.S.)

27 **Page 27: [856] Formatted** Windows 用户 5/28/2014 9:46:00 PM

28 No underline, Font color: Auto, English (U.S.)

29 **Page 27: [856] Formatted** Windows 用户 5/28/2014 9:46:00 PM

30 No underline, Font color: Auto, English (U.S.)

31 **Page 27: [857] Formatted** Windows 用户 5/28/2014 9:46:00 PM

32 No underline, Font color: Auto, English (U.S.)

33 **Page 27: [857] Formatted** Windows 用户 5/28/2014 9:46:00 PM

34 No underline, Font color: Auto, English (U.S.)

35 **Page 27: [858] Formatted** Windows 用户 5/28/2014 9:46:00 PM

36 No underline, Font color: Auto, English (U.S.)

37 **Page 27: [858] Formatted** Windows 用户 5/28/2014 9:46:00 PM

38 No underline, Font color: Auto, English (U.S.)

39 **Page 27: [859] Formatted** Windows 用户 5/28/2014 9:46:00 PM

40 No underline, Font color: Auto, English (U.S.)

41 **Page 27: [859] Formatted** Windows 用户 5/28/2014 9:46:00 PM

42 No underline, Font color: Auto, English (U.S.)

43 **Page 27: [860] Formatted** Windows 用户 5/28/2014 9:46:00 PM

44 No underline, Font color: Auto, English (U.S.)

45 **Page 27: [860] Formatted** Windows 用户 5/28/2014 9:46:00 PM

46 No underline, Font color: Auto, English (U.S.)

47 **Page 27: [861] Formatted** Windows 用户 5/28/2014 9:46:00 PM

48 No underline, Font color: Auto, English (U.S.)

1  
2  
3  
4  
5  
6  
7  
8  
9  
10  
11 **Page 27: [861] Formatted** Windows 用户 5/28/2014 9:46:00 PM

12 No underline, Font color: Auto, English (U.S.)

13  
14 **Page 27: [862] Formatted** Windows 用户 5/28/2014 9:46:00 PM

15 No underline, Font color: Auto, English (U.S.)

16  
17 **Page 27: [862] Formatted** Windows 用户 5/28/2014 9:46:00 PM

18 No underline, Font color: Auto, English (U.S.)

19  
20 **Page 27: [863] Formatted** Windows 用户 5/28/2014 9:46:00 PM

21 No underline, Font color: Auto, English (U.S.)

22  
23 **Page 27: [863] Formatted** Windows 用户 5/28/2014 9:46:00 PM

24 No underline, Font color: Auto, English (U.S.)

25  
26 **Page 27: [864] Formatted** Windows 用户 5/28/2014 9:46:00 PM

27 No underline, Font color: Auto, English (U.S.)

28  
29 **Page 27: [864] Formatted** Windows 用户 5/28/2014 9:46:00 PM

30 No underline, Font color: Auto, English (U.S.)

31  
32 **Page 27: [865] Formatted** Windows 用户 5/28/2014 9:46:00 PM

33 No underline, Font color: Auto, English (U.S.)

34  
35 **Page 27: [865] Formatted** Windows 用户 5/28/2014 9:46:00 PM

36 No underline, Font color: Auto, English (U.S.)

37  
38 **Page 27: [866] Formatted** Windows 用户 5/28/2014 9:46:00 PM

39 No underline, Font color: Auto, English (U.S.)

40  
41 **Page 27: [866] Formatted** Windows 用户 5/28/2014 9:46:00 PM

42 No underline, Font color: Auto, English (U.S.)

43  
44 **Page 27: [867] Formatted** Windows 用户 5/28/2014 9:46:00 PM

45 No underline, Font color: Auto, English (U.S.)

46  
47 **Page 27: [867] Formatted** Windows 用户 5/28/2014 9:46:00 PM

48 No underline, Font color: Auto, English (U.S.)

49  
50 **Page 27: [868] Formatted** Windows 用户 5/28/2014 9:46:00 PM

51 No underline, Font color: Auto, English (U.S.)

52  
53 **Page 27: [868] Formatted** Windows 用户 5/28/2014 9:46:00 PM

54 No underline, Font color: Auto, English (U.S.)

55  
56 **Page 27: [869] Formatted** Windows 用户 5/28/2014 9:46:00 PM

57 No underline, Font color: Auto, English (U.S.)

58  
59 **Page 27: [869] Formatted** Windows 用户 5/28/2014 9:46:00 PM

60 No underline, Font color: Auto, English (U.S.)

**Page 27: [870] Formatted** Windows 用户 5/28/2014 9:46:00 PM

No underline, Font color: Auto, English (U.S.)

**Page 27: [870] Formatted** Windows 用户 5/28/2014 9:46:00 PM

No underline, Font color: Auto, English (U.S.)

1  
2  
3  
4  
5  
6  
7  
8  
9  
10  
11 **Page 27: [871] Formatted** Windows 用户 5/28/2014 9:46:00 PM

12 No underline, Font color: Auto, English (U.S.)

13  
14 **Page 27: [871] Formatted** Windows 用户 5/28/2014 9:46:00 PM

15 No underline, Font color: Auto, English (U.S.)

16  
17 **Page 27: [872] Formatted** Windows 用户 5/28/2014 9:46:00 PM

18 No underline, Font color: Auto, English (U.S.)

19  
20 **Page 27: [872] Formatted** Windows 用户 5/28/2014 9:46:00 PM

21 No underline, Font color: Auto, English (U.S.)

22  
23 **Page 27: [873] Formatted** Windows 用户 5/28/2014 9:46:00 PM

24 No underline, Font color: Auto, English (U.S.)

25  
26 **Page 27: [873] Formatted** Windows 用户 5/28/2014 9:46:00 PM

27 No underline, Font color: Auto, English (U.S.)

28  
29 **Page 27: [874] Formatted** Windows 用户 5/28/2014 9:46:00 PM

30 No underline, Font color: Auto, English (U.S.)

31  
32 **Page 27: [874] Formatted** Windows 用户 5/28/2014 9:46:00 PM

33 No underline, Font color: Auto, English (U.S.)

34  
35 **Page 27: [875] Formatted** Windows 用户 5/28/2014 9:46:00 PM

36 No underline, Font color: Auto, English (U.S.)

37  
38 **Page 27: [875] Formatted** Windows 用户 5/28/2014 9:46:00 PM

39 No underline, Font color: Auto, English (U.S.)

40  
41 **Page 27: [876] Formatted** Windows 用户 5/28/2014 9:46:00 PM

42 No underline, Font color: Auto, English (U.S.)

43  
44 **Page 27: [876] Formatted** Windows 用户 5/28/2014 9:46:00 PM

45 No underline, Font color: Auto, English (U.S.)

46  
47 **Page 27: [877] Formatted** Windows 用户 5/28/2014 9:46:00 PM

48 No underline, Font color: Auto, English (U.S.)

49  
50 **Page 27: [877] Formatted** Windows 用户 5/28/2014 9:46:00 PM

51 No underline, Font color: Auto, English (U.S.)

52  
53 **Page 27: [878] Formatted** Windows 用户 5/28/2014 9:46:00 PM

54 No underline, Font color: Auto, English (U.S.)

55  
56 **Page 27: [878] Formatted** Windows 用户 5/28/2014 9:46:00 PM

57 No underline, Font color: Auto, English (U.S.)

58  
59 **Page 27: [879] Formatted** Windows 用户 5/28/2014 9:46:00 PM

60 No underline, Font color: Auto, English (U.S.)

**Page 27: [879] Formatted** Windows 用户 5/28/2014 9:46:00 PM

No underline, Font color: Auto, English (U.S.)

**Page 27: [880] Formatted** Windows 用户 5/28/2014 9:46:00 PM

No underline, Font color: Auto, English (U.S.)

1  
2  
3  
4  
5  
6  
7  
8  
9  
10  
11 **Page 27: [880] Formatted** Windows 用户 5/28/2014 9:46:00 PM

12 No underline, Font color: Auto, English (U.S.)

13  
14 **Page 27: [881] Formatted** Windows 用户 5/28/2014 9:46:00 PM

15 No underline, Font color: Auto, English (U.S.)

16  
17 **Page 27: [881] Formatted** Windows 用户 5/28/2014 9:46:00 PM

18 No underline, Font color: Auto, English (U.S.)

19  
20 **Page 27: [882] Formatted** Windows 用户 5/28/2014 9:46:00 PM

21 No underline, Font color: Auto, English (U.S.)

22  
23 **Page 27: [882] Formatted** Windows 用户 5/28/2014 9:46:00 PM

24 No underline, Font color: Auto, English (U.S.)

25  
26 **Page 27: [883] Formatted** Windows 用户 5/28/2014 9:46:00 PM

27 No underline, Font color: Auto, English (U.S.)

28  
29 **Page 27: [883] Formatted** Windows 用户 5/28/2014 9:46:00 PM

30 No underline, Font color: Auto, English (U.S.)

31  
32 **Page 27: [884] Formatted** Windows 用户 5/28/2014 9:46:00 PM

33 No underline, Font color: Auto, English (U.S.)

34  
35 **Page 27: [884] Formatted** Windows 用户 5/28/2014 9:46:00 PM

36 No underline, Font color: Auto, English (U.S.)

37  
38 **Page 27: [885] Formatted** Windows 用户 5/28/2014 9:46:00 PM

39 No underline, Font color: Auto, English (U.S.)

40  
41 **Page 27: [885] Formatted** Windows 用户 5/28/2014 9:46:00 PM

42 No underline, Font color: Auto, English (U.S.)

43  
44 **Page 27: [886] Formatted** Windows 用户 5/28/2014 9:46:00 PM

45 No underline, Font color: Auto, English (U.S.)

46  
47 **Page 27: [886] Formatted** Windows 用户 5/28/2014 9:46:00 PM

48 No underline, Font color: Auto, English (U.S.)

49  
50 **Page 27: [887] Formatted** Windows 用户 5/28/2014 9:46:00 PM

51 No underline, Font color: Auto, English (U.S.)

52  
53 **Page 27: [887] Formatted** Windows 用户 5/28/2014 9:46:00 PM

54 No underline, Font color: Auto, English (U.S.)

55  
56 **Page 27: [888] Formatted** Windows 用户 5/28/2014 9:46:00 PM

57 No underline, Font color: Auto, English (U.S.)

58  
59 **Page 27: [888] Formatted** Windows 用户 5/28/2014 9:46:00 PM

60 No underline, Font color: Auto, English (U.S.)

**Page 27: [889] Formatted** Windows 用户 5/28/2014 9:46:00 PM

No underline, Font color: Auto, English (U.S.)

**Page 27: [889] Formatted** Windows 用户 5/28/2014 9:46:00 PM

No underline, Font color: Auto, English (U.S.)



1  
2  
3  
4  
5  
6  
7  
8  
9  
10  
11 **Page 27: [890] Formatted** Windows 用户 5/28/2014 9:46:00 PM

12 No underline, Font color: Auto, English (U.S.)

13 **Page 27: [890] Formatted** Windows 用户 5/28/2014 9:46:00 PM

14 No underline, Font color: Auto, English (U.S.)

15 **Page 27: [891] Formatted** Windows 用户 5/28/2014 9:46:00 PM

16 No underline, Font color: Auto, English (U.S.)

17 **Page 27: [891] Formatted** Windows 用户 5/28/2014 9:46:00 PM

18 No underline, Font color: Auto, English (U.S.)

19 **Page 27: [892] Formatted** Windows 用户 5/28/2014 9:46:00 PM

20 No underline, Font color: Auto, English (U.S.)

21 **Page 27: [892] Formatted** Windows 用户 5/28/2014 9:46:00 PM

22 No underline, Font color: Auto, English (U.S.)

23 **Page 27: [893] Formatted** Windows 用户 5/28/2014 9:46:00 PM

24 No underline, Font color: Auto, English (U.S.)

25 **Page 27: [893] Formatted** Windows 用户 5/28/2014 9:46:00 PM

26 No underline, Font color: Auto, English (U.S.)

27 **Page 27: [894] Formatted** Windows 用户 5/28/2014 9:46:00 PM

28 No underline, Font color: Auto, English (U.S.)

29 **Page 27: [894] Formatted** Windows 用户 5/28/2014 9:46:00 PM

30 No underline, Font color: Auto, English (U.S.)

31 **Page 27: [895] Formatted** Windows 用户 5/28/2014 9:46:00 PM

32 No underline, Font color: Auto, English (U.S.)

33 **Page 27: [895] Formatted** Windows 用户 5/28/2014 9:46:00 PM

34 No underline, Font color: Auto, English (U.S.)

35 **Page 27: [896] Formatted** Windows 用户 5/28/2014 9:46:00 PM

36 No underline, Font color: Auto, English (U.S.)

37 **Page 27: [896] Formatted** Windows 用户 5/28/2014 9:46:00 PM

38 No underline, Font color: Auto, English (U.S.)

39 **Page 27: [897] Formatted** Windows 用户 5/28/2014 9:46:00 PM

40 No underline, Font color: Auto, English (U.S.)

41 **Page 27: [897] Formatted** Windows 用户 5/28/2014 9:46:00 PM

42 No underline, Font color: Auto, English (U.S.)

43 **Page 27: [898] Formatted** Windows 用户 5/28/2014 9:46:00 PM

44 No underline, Font color: Auto, English (U.S.)

45 **Page 27: [898] Formatted** Windows 用户 5/28/2014 9:46:00 PM

46 No underline, Font color: Auto, English (U.S.)

47 **Page 27: [899] Formatted** Windows 用户 5/28/2014 9:46:00 PM

48 No underline, Font color: Auto, English (U.S.)

1  
2  
3  
4  
5  
6  
7  
8  
9  
10  
11 **Page 27: [899] Formatted** Windows 用户 5/28/2014 9:46:00 PM

12 No underline, Font color: Auto, English (U.S.)

13  
14 **Page 27: [900] Formatted** Windows 用户 5/28/2014 9:46:00 PM

15 No underline, Font color: Auto, English (U.S.)

16  
17 **Page 27: [900] Formatted** Windows 用户 5/28/2014 9:46:00 PM

18 No underline, Font color: Auto, English (U.S.)

19  
20 **Page 27: [901] Formatted** Windows 用户 5/28/2014 9:46:00 PM

21 No underline, Font color: Auto, English (U.S.)

22  
23 **Page 27: [901] Formatted** Windows 用户 5/28/2014 9:46:00 PM

24 No underline, Font color: Auto, English (U.S.)

25  
26 **Page 27: [902] Formatted** Windows 用户 5/28/2014 9:46:00 PM

27 No underline, Font color: Auto, English (U.S.)

28  
29 **Page 27: [902] Formatted** Windows 用户 5/28/2014 9:46:00 PM

30 No underline, Font color: Auto, English (U.S.)

31  
32 **Page 27: [903] Formatted** Windows 用户 5/28/2014 9:46:00 PM

33 No underline, Font color: Auto, English (U.S.)

34  
35 **Page 27: [903] Formatted** Windows 用户 5/28/2014 9:46:00 PM

36 No underline, Font color: Auto, English (U.S.)

37  
38 **Page 27: [904] Formatted** Windows 用户 5/28/2014 9:46:00 PM

39 No underline, Font color: Auto, English (U.S.)

40  
41 **Page 27: [904] Formatted** Windows 用户 5/28/2014 9:46:00 PM

42 No underline, Font color: Auto, English (U.S.)

43  
44 **Page 27: [905] Formatted** Windows 用户 5/28/2014 9:46:00 PM

45 No underline, Font color: Auto, English (U.S.)

46  
47 **Page 27: [905] Formatted** Windows 用户 5/28/2014 9:46:00 PM

48 No underline, Font color: Auto, English (U.S.)

49  
50 **Page 27: [906] Formatted** Windows 用户 5/28/2014 9:46:00 PM

51 No underline, Font color: Auto, English (U.S.)

52  
53 **Page 27: [906] Formatted** Windows 用户 5/28/2014 9:46:00 PM

54 No underline, Font color: Auto, English (U.S.)

55  
56 **Page 27: [907] Formatted** Windows 用户 5/28/2014 9:46:00 PM

57 No underline, Font color: Auto, English (U.S.)

58  
59 **Page 27: [907] Formatted** Windows 用户 5/28/2014 9:46:00 PM

60 No underline, Font color: Auto, English (U.S.)

**Page 27: [908] Formatted** Windows 用户 5/28/2014 9:46:00 PM

No underline, Font color: Auto, English (U.S.)

**Page 27: [908] Formatted** Windows 用户 5/28/2014 9:46:00 PM

No underline, Font color: Auto, English (U.S.)

1  
2  
3  
4  
5  
6  
7  
8  
9  
10  
11 **Page 27: [909] Formatted** Windows 用户 5/28/2014 9:46:00 PM

12 No underline, Font color: Auto, English (U.S.)

13  
14 **Page 27: [909] Formatted** Windows 用户 5/28/2014 9:46:00 PM

15 No underline, Font color: Auto, English (U.S.)

16  
17 **Page 27: [910] Formatted** Windows 用户 5/28/2014 9:46:00 PM

18 No underline, Font color: Auto, English (U.S.)

19  
20 **Page 27: [910] Formatted** Windows 用户 5/28/2014 9:46:00 PM

21 No underline, Font color: Auto, English (U.S.)

22  
23 **Page 27: [911] Formatted** Windows 用户 5/28/2014 9:46:00 PM

24 No underline, Font color: Auto, English (U.S.)

25  
26 **Page 27: [911] Formatted** Windows 用户 5/28/2014 9:46:00 PM

27 No underline, Font color: Auto, English (U.S.)

28  
29 **Page 27: [912] Formatted** Windows 用户 5/28/2014 9:46:00 PM

30 No underline, Font color: Auto, English (U.S.)

31  
32 **Page 27: [912] Formatted** Windows 用户 5/28/2014 9:46:00 PM

33 No underline, Font color: Auto, English (U.S.)

34  
35 **Page 27: [913] Formatted** Windows 用户 5/28/2014 9:46:00 PM

36 No underline, Font color: Auto, English (U.S.)

37  
38 **Page 27: [913] Formatted** Windows 用户 5/28/2014 9:46:00 PM

39 No underline, Font color: Auto, English (U.S.)

40  
41 **Page 27: [914] Formatted** Windows 用户 5/28/2014 9:46:00 PM

42 No underline, Font color: Auto, English (U.S.)

43  
44 **Page 27: [914] Formatted** Windows 用户 5/28/2014 9:46:00 PM

45 No underline, Font color: Auto, English (U.S.)

46  
47 **Page 27: [915] Formatted** Windows 用户 5/28/2014 9:46:00 PM

48 No underline, Font color: Auto, English (U.S.)

49  
50 **Page 27: [915] Formatted** Windows 用户 5/28/2014 9:46:00 PM

51 No underline, Font color: Auto, English (U.S.)

52  
53 **Page 27: [916] Formatted** Windows 用户 5/28/2014 9:46:00 PM

54 No underline, Font color: Auto, English (U.S.)

55  
56 **Page 27: [916] Formatted** Windows 用户 5/28/2014 9:46:00 PM

57 No underline, Font color: Auto, English (U.S.)

58  
59 **Page 27: [917] Formatted** Windows 用户 5/28/2014 9:46:00 PM

60 No underline, Font color: Auto, English (U.S.)

**Page 27: [917] Formatted** Windows 用户 5/28/2014 9:46:00 PM

No underline, Font color: Auto, English (U.S.)

**Page 27: [918] Formatted** Windows 用户 5/28/2014 9:46:00 PM

No underline, Font color: Auto, English (U.S.)

1  
2  
3  
4  
5  
6  
7  
8  
9  
10  
11  
12  
13  
14  
15  
16  
17  
18  
19  
20  
21  
22  
23  
24  
25  
26  
27  
28  
29  
30  
31  
32  
33  
34  
35  
36  
37  
38  
39  
40  
41  
42  
43  
44  
45  
46  
47  
48  
49  
50  
51  
52  
53  
54  
55  
56  
57  
58  
59  
60

**Page 27: [918] Formatted** Windows 用户 5/28/2014 9:46:00 PM

No underline, Font color: Auto, English (U.S.)

**Page 27: [919] Formatted** Windows 用户 5/28/2014 9:46:00 PM

No underline, Font color: Auto, English (U.S.)

**Page 27: [919] Formatted** Windows 用户 5/28/2014 9:46:00 PM

No underline, Font color: Auto, English (U.S.)

**Page 27: [920] Formatted** Windows 用户 5/28/2014 9:46:00 PM

No underline, Font color: Auto, English (U.S.)

**Page 27: [920] Formatted** Windows 用户 5/28/2014 9:46:00 PM

No underline, Font color: Auto, English (U.S.)

**Page 27: [921] Formatted** Windows 用户 5/28/2014 9:46:00 PM

No underline, Font color: Auto, English (U.S.)

**Page 27: [921] Formatted** Windows 用户 5/28/2014 9:46:00 PM

No underline, Font color: Auto, English (U.S.)

**Page 27: [922] Formatted** Windows 用户 5/28/2014 9:46:00 PM

No underline, Font color: Auto, English (U.S.)

**Page 27: [922] Formatted** Windows 用户 5/28/2014 9:46:00 PM

No underline, Font color: Auto, English (U.S.)

**Page 27: [923] Formatted** Windows 用户 5/28/2014 9:46:00 PM

No underline, Font color: Auto, English (U.S.)

**Page 27: [923] Formatted** Windows 用户 5/28/2014 9:46:00 PM

No underline, Font color: Auto, English (U.S.)

**Page 27: [924] Formatted** Windows 用户 5/28/2014 9:46:00 PM

No underline, Font color: Auto, English (U.S.)

**Page 27: [924] Formatted** Windows 用户 5/28/2014 9:46:00 PM

No underline, Font color: Auto, English (U.S.)

**Page 27: [925] Formatted** Windows 用户 5/28/2014 9:46:00 PM

No underline, Font color: Auto, English (U.S.)

**Page 27: [925] Formatted** Windows 用户 5/28/2014 9:46:00 PM

No underline, Font color: Auto, English (U.S.)

**Page 27: [926] Formatted** Windows 用户 5/28/2014 9:46:00 PM

No underline, Font color: Auto, English (U.S.)

**Page 27: [926] Formatted** Windows 用户 5/28/2014 9:46:00 PM

No underline, Font color: Auto, English (U.S.)

**Page 27: [927] Formatted** Windows 用户 5/28/2014 9:46:00 PM

No underline, Font color: Auto, English (U.S.)

**Page 27: [927] Formatted** Windows 用户 5/28/2014 9:46:00 PM

No underline, Font color: Auto, English (U.S.)

1  
2  
3  
4  
5  
6  
7  
8  
9  
10  
11 **Page 27: [928] Formatted** Windows 用户 5/28/2014 9:46:00 PM

12 No underline, Font color: Auto, English (U.S.)

13 **Page 27: [928] Formatted** Windows 用户 5/28/2014 9:46:00 PM

14 No underline, Font color: Auto, English (U.S.)

15 **Page 27: [929] Formatted** Windows 用户 5/28/2014 9:46:00 PM

16 No underline, Font color: Auto, English (U.S.)

17 **Page 27: [929] Formatted** Windows 用户 5/28/2014 9:46:00 PM

18 No underline, Font color: Auto, English (U.S.)

19 **Page 27: [930] Formatted** Windows 用户 5/28/2014 9:46:00 PM

20 No underline, Font color: Auto, English (U.S.)

21 **Page 27: [930] Formatted** Windows 用户 5/28/2014 9:46:00 PM

22 No underline, Font color: Auto, English (U.S.)

23 **Page 27: [931] Formatted** Windows 用户 5/28/2014 9:46:00 PM

24 No underline, Font color: Auto, English (U.S.)

25 **Page 27: [931] Formatted** Windows 用户 5/28/2014 9:46:00 PM

26 No underline, Font color: Auto, English (U.S.)

27 **Page 27: [932] Formatted** Windows 用户 5/28/2014 9:46:00 PM

28 No underline, Font color: Auto, English (U.S.)

29 **Page 27: [932] Formatted** Windows 用户 5/28/2014 9:46:00 PM

30 No underline, Font color: Auto, English (U.S.)

31 **Page 27: [933] Formatted** Windows 用户 5/28/2014 9:46:00 PM

32 No underline, Font color: Auto, English (U.S.)

33 **Page 27: [933] Formatted** Windows 用户 5/28/2014 9:46:00 PM

34 No underline, Font color: Auto, English (U.S.)

35 **Page 27: [934] Formatted** Windows 用户 5/28/2014 9:46:00 PM

36 No underline, Font color: Auto, English (U.S.)

37 **Page 27: [934] Formatted** Windows 用户 5/28/2014 9:46:00 PM

38 No underline, Font color: Auto, English (U.S.)

39 **Page 27: [935] Formatted** Windows 用户 5/28/2014 9:46:00 PM

40 No underline, Font color: Auto, English (U.S.)

41 **Page 27: [935] Formatted** Windows 用户 5/28/2014 9:46:00 PM

42 No underline, Font color: Auto, English (U.S.)

43 **Page 27: [936] Formatted** Windows 用户 5/28/2014 9:46:00 PM

44 No underline, Font color: Auto, English (U.S.)

45 **Page 27: [936] Formatted** Windows 用户 5/28/2014 9:46:00 PM

46 No underline, Font color: Auto, English (U.S.)

47 **Page 27: [937] Formatted** Windows 用户 5/28/2014 9:46:00 PM

48 No underline, Font color: Auto, English (U.S.)

1  
2  
3  
4  
5  
6  
7  
8  
9  
10  
11 **Page 27: [937] Formatted** Windows 用户 5/28/2014 9:46:00 PM

12 No underline, Font color: Auto, English (U.S.)

13  
14 **Page 27: [938] Formatted** Windows 用户 5/28/2014 9:46:00 PM

15 No underline, Font color: Auto, English (U.S.)

16  
17 **Page 27: [938] Formatted** Windows 用户 5/28/2014 9:46:00 PM

18 No underline, Font color: Auto, English (U.S.)

19  
20 **Page 27: [939] Formatted** Windows 用户 5/28/2014 9:46:00 PM

21 No underline, Font color: Auto, English (U.S.)

22  
23 **Page 27: [939] Formatted** Windows 用户 5/28/2014 9:46:00 PM

24 No underline, Font color: Auto, English (U.S.)

25  
26 **Page 27: [940] Formatted** Windows 用户 5/28/2014 9:46:00 PM

27 No underline, Font color: Auto, English (U.S.)

28  
29 **Page 27: [940] Formatted** Windows 用户 5/28/2014 9:46:00 PM

30 No underline, Font color: Auto, English (U.S.)

31  
32 **Page 27: [941] Formatted** Windows 用户 5/28/2014 9:46:00 PM

33 No underline, Font color: Auto, English (U.S.)

34  
35 **Page 27: [941] Formatted** Windows 用户 5/28/2014 9:46:00 PM

36 No underline, Font color: Auto, English (U.S.)

37  
38 **Page 27: [942] Formatted** Windows 用户 5/28/2014 9:46:00 PM

39 No underline, Font color: Auto, English (U.S.)

40  
41 **Page 27: [942] Formatted** Windows 用户 5/28/2014 9:46:00 PM

42 No underline, Font color: Auto, English (U.S.)

43  
44 **Page 27: [943] Formatted** Windows 用户 5/28/2014 9:46:00 PM

45 No underline, Font color: Auto, English (U.S.)

46  
47 **Page 27: [943] Formatted** Windows 用户 5/28/2014 9:46:00 PM

48 No underline, Font color: Auto, English (U.S.)

49  
50 **Page 27: [944] Formatted** Windows 用户 5/28/2014 9:46:00 PM

51 No underline, Font color: Auto, English (U.S.)

52  
53 **Page 27: [944] Formatted** Windows 用户 5/28/2014 9:46:00 PM

54 No underline, Font color: Auto, English (U.S.)

55  
56 **Page 27: [945] Formatted** Windows 用户 5/28/2014 9:46:00 PM

57 No underline, Font color: Auto, English (U.S.)

58  
59 **Page 27: [945] Formatted** Windows 用户 5/28/2014 9:46:00 PM

60 No underline, Font color: Auto, English (U.S.)

**Page 27: [946] Formatted** Windows 用户 5/28/2014 9:46:00 PM

No underline, Font color: Auto, English (U.S.)

**Page 27: [946] Formatted** Windows 用户 5/28/2014 9:46:00 PM

No underline, Font color: Auto, English (U.S.)



1  
2  
3  
4  
5  
6  
7  
8  
9  
10  
11 **Page 27: [947] Formatted** Windows 用户 5/28/2014 9:46:00 PM

12 No underline, Font color: Auto, English (U.S.)

13 **Page 27: [947] Formatted** Windows 用户 5/28/2014 9:46:00 PM

14 No underline, Font color: Auto, English (U.S.)

15 **Page 27: [948] Formatted** Windows 用户 5/28/2014 9:46:00 PM

16 No underline, Font color: Auto, English (U.S.)

17 **Page 27: [948] Formatted** Windows 用户 5/28/2014 9:46:00 PM

18 No underline, Font color: Auto, English (U.S.)

19 **Page 27: [949] Formatted** Windows 用户 5/28/2014 9:46:00 PM

20 No underline, Font color: Auto, English (U.S.)

21 **Page 27: [949] Formatted** Windows 用户 5/28/2014 9:46:00 PM

22 No underline, Font color: Auto, English (U.S.)

23 **Page 27: [950] Formatted** Windows 用户 5/28/2014 9:46:00 PM

24 No underline, Font color: Auto, English (U.S.)

25 **Page 27: [950] Formatted** Windows 用户 5/28/2014 9:46:00 PM

26 No underline, Font color: Auto, English (U.S.)

27 **Page 27: [951] Formatted** Windows 用户 5/28/2014 9:46:00 PM

28 No underline, Font color: Auto, English (U.S.)

29 **Page 27: [951] Formatted** Windows 用户 5/28/2014 9:46:00 PM

30 No underline, Font color: Auto, English (U.S.)

31 **Page 27: [952] Formatted** Windows 用户 5/28/2014 9:46:00 PM

32 No underline, Font color: Auto, English (U.S.)

33 **Page 27: [952] Formatted** Windows 用户 5/28/2014 9:46:00 PM

34 No underline, Font color: Auto, English (U.S.)

35 **Page 27: [953] Formatted** Windows 用户 5/28/2014 9:46:00 PM

36 No underline, Font color: Auto, English (U.S.)

37 **Page 27: [953] Formatted** Windows 用户 5/28/2014 9:46:00 PM

38 No underline, Font color: Auto, English (U.S.)

39 **Page 27: [954] Formatted** Windows 用户 5/28/2014 9:46:00 PM

40 No underline, Font color: Auto, English (U.S.)

41 **Page 27: [954] Formatted** Windows 用户 5/28/2014 9:46:00 PM

42 No underline, Font color: Auto, English (U.S.)

43 **Page 27: [955] Formatted** Windows 用户 5/28/2014 9:46:00 PM

44 No underline, Font color: Auto, English (U.S.)

45 **Page 27: [955] Formatted** Windows 用户 5/28/2014 9:46:00 PM

46 No underline, Font color: Auto, English (U.S.)

47 **Page 27: [956] Formatted** Windows 用户 5/28/2014 9:46:00 PM

48 No underline, Font color: Auto, English (U.S.)



1  
2  
3  
4  
5  
6  
7  
8  
9  
10  
11  
12  
13  
14  
15  
16  
17  
18  
19  
20  
21  
22  
23  
24  
25  
26  
27  
28  
29  
30  
31  
32  
33  
34  
35  
36  
37  
38  
39  
40  
41  
42  
43  
44  
45  
46  
47  
48  
49  
50  
51  
52  
53  
54  
55  
56  
57  
58  
59  
60

**Page 27: [956] Formatted** Windows 用户 5/28/2014 9:46:00 PM

No underline, Font color: Auto, English (U.S.)

**Page 27: [957] Formatted** Windows 用户 5/28/2014 9:46:00 PM

No underline, Font color: Auto, English (U.S.)

**Page 27: [957] Formatted** Windows 用户 5/28/2014 9:46:00 PM

No underline, Font color: Auto, English (U.S.)

**Page 27: [958] Formatted** Windows 用户 5/28/2014 9:46:00 PM

No underline, Font color: Auto, English (U.S.)

**Page 27: [958] Formatted** Windows 用户 5/28/2014 9:46:00 PM

No underline, Font color: Auto, English (U.S.)

**Page 27: [959] Formatted** Windows 用户 5/28/2014 9:46:00 PM

No underline, Font color: Auto, English (U.S.)

**Page 27: [959] Formatted** Windows 用户 5/28/2014 9:46:00 PM

No underline, Font color: Auto, English (U.S.)

**Page 27: [960] Formatted** Windows 用户 5/28/2014 9:46:00 PM

No underline, Font color: Auto, English (U.S.)

**Page 27: [960] Formatted** Windows 用户 5/28/2014 9:46:00 PM

No underline, Font color: Auto, English (U.S.)

**Page 27: [961] Formatted** Windows 用户 5/28/2014 9:46:00 PM

No underline, Font color: Auto, English (U.S.)

**Page 27: [961] Formatted** Windows 用户 5/28/2014 9:46:00 PM

No underline, Font color: Auto, English (U.S.)

**Page 27: [962] Formatted** Windows 用户 5/28/2014 9:46:00 PM

No underline, Font color: Auto, English (U.S.)

**Page 27: [962] Formatted** Windows 用户 5/28/2014 9:46:00 PM

No underline, Font color: Auto, English (U.S.)

**Page 27: [963] Formatted** Windows 用户 5/28/2014 9:46:00 PM

No underline, Font color: Auto, English (U.S.)

**Page 27: [963] Formatted** Windows 用户 5/28/2014 9:46:00 PM

No underline, Font color: Auto, English (U.S.)

**Page 27: [964] Formatted** Windows 用户 5/28/2014 9:46:00 PM

No underline, Font color: Auto, English (U.S.)

**Page 27: [964] Formatted** Windows 用户 5/28/2014 9:46:00 PM

No underline, Font color: Auto, English (U.S.)

**Page 27: [965] Formatted** Windows 用户 5/28/2014 9:46:00 PM

No underline, Font color: Auto, English (U.S.)

**Page 27: [965] Formatted** Windows 用户 5/28/2014 9:46:00 PM

No underline, Font color: Auto, English (U.S.)

1  
2  
3  
4  
5  
6  
7  
8  
9  
10  
11 **Page 27: [966] Formatted** Windows 用户 5/28/2014 9:46:00 PM

12 No underline, Font color: Auto, English (U.S.)

13  
14 **Page 27: [966] Formatted** Windows 用户 5/28/2014 9:46:00 PM

15 No underline, Font color: Auto, English (U.S.)

16  
17 **Page 27: [967] Formatted** Windows 用户 5/28/2014 9:46:00 PM

18 No underline, Font color: Auto, English (U.S.)

19  
20 **Page 27: [967] Formatted** Windows 用户 5/28/2014 9:46:00 PM

21 No underline, Font color: Auto, English (U.S.)

22  
23 **Page 27: [968] Formatted** Windows 用户 5/28/2014 9:46:00 PM

24 No underline, Font color: Auto, English (U.S.)

25  
26 **Page 27: [968] Formatted** Windows 用户 5/28/2014 9:46:00 PM

27 No underline, Font color: Auto, English (U.S.)

28  
29 **Page 27: [969] Formatted** Windows 用户 5/28/2014 9:46:00 PM

30 No underline, Font color: Auto, English (U.S.)

31  
32 **Page 27: [969] Formatted** Windows 用户 5/28/2014 9:46:00 PM

33 No underline, Font color: Auto, English (U.S.)

34  
35 **Page 27: [970] Formatted** Windows 用户 5/28/2014 9:46:00 PM

36 No underline, Font color: Auto, English (U.S.)

37  
38 **Page 27: [970] Formatted** Windows 用户 5/28/2014 9:46:00 PM

39 No underline, Font color: Auto, English (U.S.)

40  
41 **Page 27: [971] Formatted** Windows 用户 5/28/2014 9:46:00 PM

42 No underline, Font color: Auto, English (U.S.)

43  
44 **Page 27: [971] Formatted** Windows 用户 5/28/2014 9:46:00 PM

45 No underline, Font color: Auto, English (U.S.)

46  
47 **Page 27: [972] Formatted** Windows 用户 5/28/2014 9:46:00 PM

48 No underline, Font color: Auto, English (U.S.)

49  
50 **Page 27: [972] Formatted** Windows 用户 5/28/2014 9:46:00 PM

51 No underline, Font color: Auto, English (U.S.)

52  
53 **Page 27: [973] Formatted** Windows 用户 5/28/2014 9:46:00 PM

54 No underline, Font color: Auto, English (U.S.)

55  
56 **Page 27: [973] Formatted** Windows 用户 5/28/2014 9:46:00 PM

57 No underline, Font color: Auto, English (U.S.)

58  
59 **Page 27: [974] Formatted** Windows 用户 5/28/2014 9:46:00 PM

60 No underline, Font color: Auto, English (U.S.)

**Page 27: [974] Formatted** Windows 用户 5/28/2014 9:46:00 PM

No underline, Font color: Auto, English (U.S.)

**Page 27: [975] Formatted** Windows 用户 5/28/2014 9:46:00 PM

No underline, Font color: Auto, English (U.S.)

1  
2  
3  
4  
5  
6  
7  
8  
9  
10  
11  
12  
13  
14  
15  
16  
17  
18  
19  
20  
21  
22  
23  
24  
25  
26  
27  
28  
29  
30  
31  
32  
33  
34  
35  
36  
37  
38  
39  
40  
41  
42  
43  
44  
45  
46  
47  
48  
49  
50  
51  
52  
53  
54  
55  
56  
57  
58  
59  
60

**Page 27: [975] Formatted** Windows 用户 5/28/2014 9:46:00 PM

No underline, Font color: Auto, English (U.S.)

**Page 27: [976] Formatted** Windows 用户 5/28/2014 9:46:00 PM

No underline, Font color: Auto, English (U.S.)

**Page 27: [976] Formatted** Windows 用户 5/28/2014 9:46:00 PM

No underline, Font color: Auto, English (U.S.)

**Page 27: [977] Formatted** Windows 用户 5/28/2014 9:46:00 PM

No underline, Font color: Auto, English (U.S.)

**Page 27: [977] Formatted** Windows 用户 5/28/2014 9:46:00 PM

No underline, Font color: Auto, English (U.S.)

**Page 27: [978] Formatted** Windows 用户 5/28/2014 9:46:00 PM

No underline, Font color: Auto, English (U.S.)

**Page 27: [978] Formatted** Windows 用户 5/28/2014 9:46:00 PM

No underline, Font color: Auto, English (U.S.)

**Page 27: [979] Formatted** Windows 用户 5/28/2014 9:46:00 PM

No underline, Font color: Auto, English (U.S.)

**Page 27: [979] Formatted** Windows 用户 5/28/2014 9:46:00 PM

No underline, Font color: Auto, English (U.S.)

**Page 27: [980] Formatted** Windows 用户 5/28/2014 9:46:00 PM

No underline, Font color: Auto, English (U.S.)

**Page 27: [980] Formatted** Windows 用户 5/28/2014 9:46:00 PM

No underline, Font color: Auto, English (U.S.)

**Page 27: [981] Formatted** Windows 用户 5/28/2014 9:46:00 PM

No underline, Font color: Auto, English (U.S.)

**Page 27: [981] Formatted** Windows 用户 5/28/2014 9:46:00 PM

No underline, Font color: Auto, English (U.S.)

**Page 27: [982] Formatted** Windows 用户 5/28/2014 9:46:00 PM

No underline, Font color: Auto, English (U.S.)

**Page 27: [982] Formatted** Windows 用户 5/28/2014 9:46:00 PM

No underline, Font color: Auto, English (U.S.)

**Page 27: [983] Formatted** Windows 用户 5/28/2014 9:46:00 PM

No underline, Font color: Auto, English (U.S.)

**Page 27: [983] Formatted** Windows 用户 5/28/2014 9:46:00 PM

No underline, Font color: Auto, English (U.S.)

**Page 27: [984] Formatted** Windows 用户 5/28/2014 9:46:00 PM

No underline, Font color: Auto, English (U.S.)

**Page 27: [984] Formatted** Windows 用户 5/28/2014 9:46:00 PM

No underline, Font color: Auto, English (U.S.)

1  
2  
3  
4  
5  
6  
7  
8  
9  
10  
11 **Page 27: [985] Formatted** Windows 用户 5/28/2014 9:46:00 PM

12 No underline, Font color: Auto, English (U.S.)

13  
14 **Page 27: [985] Formatted** Windows 用户 5/28/2014 9:46:00 PM

15 No underline, Font color: Auto, English (U.S.)

16  
17 **Page 27: [986] Formatted** Windows 用户 5/28/2014 9:46:00 PM

18 No underline, Font color: Auto, English (U.S.)

19  
20 **Page 27: [986] Formatted** Windows 用户 5/28/2014 9:46:00 PM

21 No underline, Font color: Auto, English (U.S.)

22  
23 **Page 27: [987] Formatted** 作者 5/28/2014 9:46:00 PM

24 English (U.K.)  
25  
26  
27  
28  
29  
30  
31  
32  
33  
34  
35  
36  
37  
38  
39  
40  
41  
42  
43  
44  
45  
46  
47  
48  
49  
50  
51  
52  
53  
54  
55  
56  
57  
58  
59  
60

# BMJ Open

## Estimating daily salt intake based on 24-hour urinary sodium excretion in adults aged 18–69 years in Shandong, China

|                                 |                                                                                                                                                                                                                                                                                                                                                                                                                                                                                                                                                                                                                                                                                                                                                                                                                                                                       |
|---------------------------------|-----------------------------------------------------------------------------------------------------------------------------------------------------------------------------------------------------------------------------------------------------------------------------------------------------------------------------------------------------------------------------------------------------------------------------------------------------------------------------------------------------------------------------------------------------------------------------------------------------------------------------------------------------------------------------------------------------------------------------------------------------------------------------------------------------------------------------------------------------------------------|
| Journal:                        | <i>BMJ Open</i>                                                                                                                                                                                                                                                                                                                                                                                                                                                                                                                                                                                                                                                                                                                                                                                                                                                       |
| Manuscript ID:                  | bmjopen-2014-005089.R2                                                                                                                                                                                                                                                                                                                                                                                                                                                                                                                                                                                                                                                                                                                                                                                                                                                |
| Article Type:                   | Research                                                                                                                                                                                                                                                                                                                                                                                                                                                                                                                                                                                                                                                                                                                                                                                                                                                              |
| Date Submitted by the Author:   | 27-Jun-2014                                                                                                                                                                                                                                                                                                                                                                                                                                                                                                                                                                                                                                                                                                                                                                                                                                                           |
| Complete List of Authors:       | Zhang, Ji-Yu; Shandong Center for Disease Prevention and Control<br>Yan, Liuxia; National Center for Chronic and Non-communicable Disease Control and Prevention,<br>Tang, Junli; Shandong Center for Disease Prevention and Control<br>Ma, Jixiang; National Center for Chronic and Non-communicable Disease Control and Prevention,<br>Guo, Xiaolei; Shandong Center for Disease Prevention and Control<br>Zhao, Wenhua; Chinese Center for Disease Control and Prevention,<br>Zhang, Xiaofei; Department of Clinical Epidemiology and Biostatistics, Second Affiliated Hospital of Zhejiang University College of Medicine,<br>Li, Jianhong; National Center for Chronic and Non-communicable Disease Control and Prevention,<br>Chu, Jie; Shandong Center for Disease Prevention and Control<br>Bi, zhenqiang; Shandong Center for Disease Prevention and Control |
| <b>Primary Subject Heading</b>: | Public health                                                                                                                                                                                                                                                                                                                                                                                                                                                                                                                                                                                                                                                                                                                                                                                                                                                         |
| Secondary Subject Heading:      | Epidemiology                                                                                                                                                                                                                                                                                                                                                                                                                                                                                                                                                                                                                                                                                                                                                                                                                                                          |
| Keywords:                       | Hypertension < CARDIOLOGY, EPIDEMIOLOGY, NUTRITION & DIETETICS                                                                                                                                                                                                                                                                                                                                                                                                                                                                                                                                                                                                                                                                                                                                                                                                        |
|                                 |                                                                                                                                                                                                                                                                                                                                                                                                                                                                                                                                                                                                                                                                                                                                                                                                                                                                       |

SCHOLARONE™  
Manuscripts

1  
2  
3 **Estimating daily salt intake based on 24-hour urinary sodium excretion in adults**  
4  
5  
6 **aged 18–69 years in Shandong, China**  
7

8 *Corresponding Author:*  
9

10 Dr. Zhen-qiang BI

11 Shandong Center for Disease Control and Prevention

12 16992# Jingshi RD., Jinan, Shandong, PR of China250014

13 TEL: 0086-531-82679601

14 FAX: 0086-531-82679620

15 E-mail: [bizhenqiang@gmail.com](mailto:bizhenqiang@gmail.com)  
16  
17  
18  
19  
20  
21  
22  
23  
24  
25  
26  
27

28 Authors: Ji-yu ZHANG<sup>1</sup>, Liu-xia YAN<sup>2</sup>, Jun-li TANG<sup>1</sup>, Ji-xiang MA<sup>2</sup>, Xiao-lei GUO<sup>1</sup>,  
29 Wen-hua ZHAO<sup>3</sup>, Xiao-fei ZHANG<sup>4</sup>, Jian-hong Li<sup>2</sup>, Jie Chu<sup>1</sup>, Zhen-qiang BI<sup>1\*</sup>  
30  
31

32 Affiliations:  
33

34 1. Shandong Center for Disease Control and Prevention, 250014 Jinan, China  
35

36 2. National Center for Chronic and Non-communicable Disease Control and Prevention  
37

38 Chinese Center for Disease Control and Prevention, 100050 Beijing, China,  
39

40 3. Chinese Center for Disease Control and Prevention, 102206 Beijing, China  
41

42 4. Department of Clinical Epidemiology and Biostatistics, Second Affiliated Hospital of  
43  
44 Zhejiang University College of Medicine, 310009 Hangzhou, China  
45  
46  
47

48 TABLES: 4  
49

50 FIGURES: 0  
51

52 SUPPLEMENTARY: 0  
53  
54

55 WORD COUNT: 1906  
56  
57  
58  
59  
60

1  
2  
3 KEY WORDS: Salt, sodium, 24-hour urine, cardiovascular disease, China  
4  
5  
6  
7  
8  
9  
10  
11  
12  
13  
14  
15  
16  
17  
18  
19  
20  
21  
22  
23  
24  
25  
26  
27  
28  
29  
30  
31  
32  
33  
34  
35  
36  
37  
38  
39  
40  
41  
42  
43  
44  
45  
46  
47  
48  
49  
50  
51  
52  
53  
54  
55  
56  
57  
58  
59  
60

For peer review only



**ABSTRACT**

**Objective:**Based on 24-h urinary sodium excretion, to estimate the daily salt intake among residents aged 18–69 years in Shandong, China.

**Setting:** Twenty selected counties/districts in Shandong stratified by geographic region (Eastern, Central Southern, and North Western) and residence type (urban versus rural).

**Participants:** Among randomly selected 2184 adults, 2061 provided usable 24 h urine samples. Urine volume <500 mL or creatinine level <3.81 mmol (mean-2SD: day/weight (kg)) for men and 4.57 mmol (mean-2SD: day/weight (kg)) for women were excluded from analysis..

**Results:**The mean sodium level excreted over 24 h was 237.61 mmol (95% CI: 224.77–250.44)mmol. Overall, the estimated mean salt intake was 13.90 g/day (95% CI: 13.15–14.65). The mean salt intake among rural residents was higher than that of urban residents (14.00 g vs 13.68 g;  $p<0.01$ ). Salt intake in men was higher than that in women (14.40 g vs 13.37 g;  $p<0.01$ ). Approximately 96% of the survey participants had a dietary salt intake of  $\geq 6$  g /day.

**Conclusion:** The salt intake in Shandong is alarmingly higher than the current recommended amount (6 g/day). Thus, effective interventions to reduce salt intake levels to combat the increasing burden of non-communicable diseases need to be developed and implemented.

### Strengths and limitations

The gold standard 24-h urinary sodium excretion was used to estimate salt intake with strict exclusion criteria to ensure data quality. A limitation of the study was that only a single 24-hour urine collection was obtained from each participant. A single collection will less accurately reflect 24-hour sodium intake than will several collections. However, the day-to-day variation in sodium excretion can vary in both directions, so it is unlikely that the findings overstated the inaccuracy of the claim of a low sodium intake.

## BACKGROUND

In China, hypertension is a major contributor to cardiovascular disease (CVD), which accounts for about 40% of all deaths [1] and 23% of the health care costs [2]. Evidence suggests that a high level of salt intake is associated with high blood pressure (BP) and a greater risk of stroke and CVD [3–6]. The National China Nutrition Surveys (1982, 1992, and 2002) and the Chinese Behavioral Risk Factor Surveillance indicated that approximately 80% of Chinese individuals consume salt more than the upper limit of the recommended salt (sodium chloride) intake (6 g/day) by the Chinese Nutritional Society (2007). In 2010, the mean salt intake among the Chinese was estimated to be 9.1 g/day in urban areas, and 11.5 g/day in rural areas [1].

Reducing salt intake is one of the easiest, most efficient and cost-effective ways to reduce the burden of CVD and health care costs, which would result in a substantial improvement in public health [1, 7]. Globally, dietary sodium reduction has been recommended as a major strategy for the prevention and control of non-communicable diseases [8]. Several countries including Japan, the United Kingdom (UK), Finland, Portugal, and the United States (US), have succeeded in reducing the population-wide sodium intake [9–11]. Unlike in Western countries, a major challenge to reduce sodium intake in China is that the majority of sodium comes from the salt added to home cooked food rather than from commercially processed foods. A recent study suggested that most of the dietary sodium intake (76%) was attributed to salt added during home cooking [12]. In contrast, processed foods contributed heavily to sodium intake in the UK (95%) and the US (71%) [12]. Therefore, efforts to reduce sodium intake in China should focus on

1  
2  
3 reducing the sodium level in home cooked foods.  
4  
5  
6  
7

8 Shandong Province is one of the most populous provinces in China. Sodium intake  
9 among most Shandong residents considerably exceeds the recommended limit. In 2002,  
10 the mean daily salt intake was 12.6 g and the prevalence of hypertension was 25.1%.  
11  
12 High salt intake has caused huge economic loss [2]. In 2011, the Chinese Ministry of  
13 Health (MOH) selected Shandong province as a national pilot area and the  
14 Shandong-MOH Action on Salt and Hypertension (SMASH) Project was set up to reduce  
15 the sodium level in the Chinese diet. To help develop effective interventions for the  
16 SMASH Project, a baseline survey was conducted in 2011 to assess salt consumption and  
17 the prevalence of hypertension among the residents in Shandong. The measurement of  
18 24-h urinary sodium excretion is considered the gold standard method for obtaining data  
19 on the sodium intake in population surveys [1]. However, in China, few studies have been  
20 conducted on the salt intake of the general population based on the 24-h urinary sodium  
21 excretion method. This study analyses the baseline survey to estimate the daily intake of  
22 dietary sodium among the general adult Shandong population (aged 18–69 years) based  
23 on 24-h urinary sodium excretion.  
24  
25  
26  
27  
28  
29  
30  
31  
32  
33  
34  
35  
36  
37  
38  
39  
40  
41  
42  
43  
44  
45

## 46 **METHODS**

47  
48  
49 A cross-sectional survey was conducted in Shandong province from June 2011 to July  
50 2011. Multi-stage (four-stage) cluster sampling was used to select a provincially  
51 representative sample of the adult population (aged 18–69 years). Briefly, a total of 140  
52 counties/districts in Shandong province were stratified by geographic region (Eastern,  
53  
54  
55  
56  
57  
58  
59  
60

1  
2  
3 Central Southern, and North Western) and residence type (urban versus rural). Twenty  
4 counties/districts were selected (12 rural counties and 8 urban districts) for this study.  
5  
6  
7  
8 Using a proportional probability sampling (PPS) method, three townships (in rural areas)  
9  
10 or two suburbs (in urban areas) were chosen from each selected county or district. The  
11  
12 PPS method was also used to select one village/community from each sampled  
13  
14 township/suburb. From each chosen village/community, 42 subjects were randomly  
15  
16 chosen resulting in a total sample size of 2184 subjects.  
17  
18  
19

20  
21  
22 A face-to-face interview using a close-ended questionnaire was conducted by trained  
23  
24 public health professionals with experience in conducting interviews for similar health  
25  
26 surveys to collect information on demographics (gender, age, education, and income).  
27  
28  
29

30  
31  
32 All subjects were given written and verbal instructions to collect a 24-h urine sample. The  
33  
34 first urine of the day was discarded and all urine over the following 24 h was collected in  
35  
36 provided bottles. All bottles from the same participant were carefully mixed and the  
37  
38 volume of urine was measured. Then a 20 mL aliquot of mixed urine was taken and was  
39  
40 immediately frozen at -20°C and sent to the laboratory for analysis.  
41  
42  
43  
44

45  
46 The samples were first assayed for creatinine concentration using the picric acid method  
47  
48 (ADICON Clinical Laboratory; CAP accredited). Samples with a total daily volume <500  
49  
50 mL or creatinine level <3.81 mmol (mean-2SD: day/weight (kg)) for men and 4.57 mmol  
51  
52 (mean-2SD: day/weight (kg)) for women were considered to be incomplete or inaccurate  
53  
54 urine collection and were thus excluded from data analysis. The sodium concentration  
55  
56  
57  
58  
59  
60

1  
2  
3 was determined using the direction selective electrode method. Daily salt intake was  
4  
5 estimated by assessing 24-h urinary sodium excretion based on the assumption that all  
6  
7 sodium was ingested in the form of sodium chloride.  
8  
9

10  
11  
12 Height, weight, and waist circumference were measured in all subjects. Of 2184 subjects,  
13  
14 2061 subjects with complete data were included in this analysis (response rate,  
15  
16 94.4%). Educational level and annual household income were used as indicators for social  
17  
18 economic status. We divided participants into five groups based on education level: no  
19  
20 education, primary school, junior high school, senior high school, college, and higher  
21  
22 education. Annual household income was classified into high, middle, and low, according  
23  
24 to tertiles. Body mass index ( $\text{BMI} = \text{weight (Kg)} / \text{height (m)}^2$ ) was calculated Individuals  
25  
26 with a  $\text{BMI} \geq 24$  but  $< 28 \text{ kg/m}^2$  were defined as being overweight and those with a  
27  
28  $\text{BMI} \geq 28 \text{ kg/m}^2$  were considered obese.  
29  
30  
31  
32  
33  
34  
35  
36

37 Statistical analyses were performed using the Statistical Analysis System (SAS) version  
38  
39 9.3 (SAS Institute Inc., Cary, North Carolina, USA).  $P < 0.05$  was considered significant.  
40  
41 All the results shown were weighted by the total demography in Shandong province.  
42  
43 Survey weight (total weight = design weight  $\times$  post-stratification weight) was used to  
44  
45 calculate weighted proportions. Design weight was calculated to account for different  
46  
47 factors including cluster design, strata, and individual factors. The population data  
48  
49 from Shandong province was used to generate the post-stratification weight. Means and  
50  
51 95% CIs were calculated for all variables and normality of the data was assessed. Analysis  
52  
53 of variance and the Chi-square test were used to test the significance of differences  
54  
55  
56  
57  
58  
59  
60

1  
2  
3 between groups.  
4  
5  
6  
7

8 This study received ethics approval from the Ethics Committee of the Shandong Centre  
9 for Disease Control and Prevention. All participants provided written informed consent to  
10 participate in this study.  
11  
12  
13

## 14 15 16 17 **RESULTS**

### 18 19 **Study subjects**

20 A total of 2061 provided urine specimens out of which 123 samples were further  
21 excluded from analysis because of incomplete or inaccurate urine collection. There was  
22 no significant differences between included subjects and excluded subjects in terms of  
23 age, sex, and residence type ( $t = 1.52, p > 0.05; \chi^2 = 0.02, p > 0.05; \chi^2 = 0.32, p > 0.05$ ; Table 1).  
24  
25  
26  
27  
28  
29  
30  
31  
32  
33

34 The characteristics of each subpopulation are summarised in table 2. Of 2061 eligible  
35 samples, 1076 were male (52.21%) and 985 were women (47.79%). The mean age,  
36 height, and BMI were 41.23 years, 163.00 cm, and 24.22 kg/m<sup>2</sup>, respectively. There were  
37 no significant differences in age and BMI between men and women ( $t = 0.34, p > 0.05; t =$   
38  $0.29, p > 0.05$ ). However, men were significantly taller than women ( $t = 37.65, p < 0.05$ ).  
39  
40  
41  
42  
43  
44  
45  
46  
47  
48  
49  
50  
51  
52  
53  
54  
55  
56  
57  
58  
59  
60  
The prevalence of overweight and obese individuals was 33.72% and 18.00%,  
respectively, with no significant differences between men and women ( $\chi^2 = 0.90,$   
 $p > 0.05; \chi^2 = 0.001, p > 0.05$ ). Of the tested subjects, 82.90% had an income <10,000  
RMB and 42.60% had an education level of junior high school.



### Salt intake

The 24-h urinary sodium level ranged from 22.05 to 750.79 mmol, with a mean of 231.10 mmol. Tables 3 and 4 show the 24-h urinary sodium excretion and estimated daily salt intake for each subpopulation. The mean sodium level excreted over 24 h was 237.61 mmol (95%CI: 224.77–250.44 mmol), which corresponds to 13.90 g NaCl (95%CI: 13.15–14.65 g). The mean salt intake by rural residents was more than that of urban residents (14.00 g vs 13.68 g;  $p<0.01$ ). Salt intake in men was higher than that in women (14.40 g vs 13.37 g;  $p<0.01$ ). There were no significant differences in the salt intake between age groups.

### DISCUSSION

It is challenging to accurately estimate sodium intake because it is very difficult to know the exact amount of salt added during cooking (even in restaurants) and at the table. It is also difficult to estimate the amount of salt that has been left on the plate, and to determine the salt content in food and drinking water [1]. Therefore, as suggested by a number of reports [1,3,13], the best method to determine salt intake is measuring the amount excreted in 24-h urine. In China, very few studies have measured the salt intake using 24-h urinary excretion and none have used a representative sample. Liu et al reported an intake of 188.4 mmol/day (corresponding to 11.02 gNaCl) in a population of 48–56-year-old individuals in China [14]; a value much smaller than that obtained in the present study (224.77 mmol/24 h, 13.9 g). The current study indicates that the sodium intake is very high in a representative population of Shandong adults, higher than that in a UK population aged 19–64 years (148 mmol) [15]. Salt intake by men and women was

1  
2  
3 found to be 246.23 mmol/day and 228.52 mmol/day, respectively, which is higher than  
4 that in the population in Toyama (men, 224 mmol/day; women, 201mmol/day) [11, 16],  
5  
6 the US (men, 180–190 mmol/day; women, 130–150 mmol/day) [17],and the UK (men,  
7  
8 161 mmol/day; women, 127 mmol/day) [17].  
9  
10  
11

12  
13  
14  
15 The salt intake in China is double the upper limit of recommended intake of 80–110  
16 mmol/day (5–6 g salt/day) by the World Health Organisation in 1982 [18] and in the  
17  
18 China Nutrition Recommendations [19]. In China, the high salt intake is mainly due to  
19  
20 the high consumption of soya sauce and the tradition of adding a large amount of salt to  
21  
22 the food both during cooking and at the table [3,20,21]. Consistent with other studies [3,  
23  
24 20, 22], salt intake in men (14.4 g) was higher than that in women (13.9 g) in Shandong  
25  
26 possibly because of the higher overall food intake by men and the differences in food  
27  
28 habits between men and women. In most populations, salt intake is high and well above  
29  
30 the daily recommended values. Now resident health records are being established in  
31  
32 Shandong province, it is necessary to evaluate and record the salt intake for individuals  
33  
34 by FFQ or other method, especially among chronic disease patients and high risk  
35  
36 individuals, it is very important to focus on the salt intake and persuade them to change  
37  
38 the habit of high salt intake.  
39  
40  
41  
42  
43  
44  
45  
46  
47

48 Strong and consistent evidence from animal studies, clinical trials, and epidemiological  
49  
50 data from within and across populations suggests high salt intake is an important risk  
51  
52 factor for high BP among hypertensive and normotensive individuals[23]. Additionally,  
53  
54 high salt intake is also associated with increased risk of coronary heart disease and  
55  
56  
57  
58  
59  
60

1  
2  
3 stroke[24]. Therefore, public health initiatives are needed to reduce salt consumption [3,4]  
4  
5 and in turn lower the burden of CVDs and increase life expectancy. The government  
6  
7 needs to focus and resolve this severe situation. Salt reduction must be undertaken.  
8  
9 Health education and promotion based on media campaigns, as well as timely  
10  
11 community-based initiatives to limit the amount of salt added to food by individuals  
12  
13 would increase public awareness. Meanwhile, it is necessary to collaborate with  
14  
15 restaurants and food industries to reduce excessive salt. Such public health approaches  
16  
17 can be simple, at low cost and effective. Indeed, campaigns such as the SMASH and the  
18  
19 China Rural Health Initiative Sodium Reduction Study are already underway [25]. As  
20  
21 reported by Li et al [26], in China, measures for salt reduction will include government  
22  
23 initiatives, health education and promotion, promotion of low sodium salt in food  
24  
25 processing companies and restaurants. In Shandong, education through radio, television,  
26  
27 internet, and movies is underway to improve the knowledge of the residents about  
28  
29 low-salt diets. To bring about behavioural changes, salt spoons have been provided for  
30  
31 every family in the entire province. Key groups comprising of governors, medical  
32  
33 personnel, and stakeholders from the food processing enterprise and restaurants are  
34  
35 trained. Local standards for the amount of salt in soy sauce pickles and other dishes in the  
36  
37 cuisine of Shandong have been formulated. The results from the present study could be  
38  
39 useful in these endeavours.  
40  
41  
42  
43  
44  
45  
46  
47  
48  
49

50  
51 A limitation of the study was that only a single 24-hour urine collection was obtained  
52  
53 from each participant. A single collection will less accurately reflect 24-hour sodium  
54  
55 intake than will several collections. However, the day-to-day variation in sodium  
56  
57  
58  
59  
60

1  
2  
3 excretion can vary in both directions, so it is unlikely that the findings overstated the  
4 inaccuracy of the claim of a low sodium intake.  
5  
6

### 7 8 **Acknowledgments** 9

10 The authors thank all the investigators from the national, provincial, and county level  
11 CDCs, and all the participants of the survey.  
12  
13

### 14 15 **Contributors** 16

17 Conceived and designed the experiments: Jiyu Zhang, Liuxia Yan, Junli Tang, Zhenqiang  
18 Bi. Performed the experiments: Jiyu Zhang, Junli Tang, Zhenqiang Bi. Analysed the data:  
19 Jiyu Zhang, Junli Tang, Zhenqiang Bi. Contributed reagents/materials/analysis tools: Jiyu  
20 Zhang, Jixiang Ma, Xiaolei Guo, Wen-hua Zhao, Xiaofei Zhang, Jianhong Li, Jie Chu.  
21  
22 Wrote the manuscript: Jiyu Zhang, Liuxia Yan, Junli Tang, Zhenqiang Bi.  
23  
24  
25  
26  
27  
28

### 29 30 **Funding** 31

32 The survey was supported by funds from the Chinese Centre for Disease Control and  
33 Prevention (China CDC), National Centre for Non-Communicable and Chronic Disease  
34 Control and Prevention (NCNCD, China CDC), and the Technical Development Plan in  
35 Shandong (implemented by Shandong CDC, Grant number: 2012GSF11828).  
36  
37  
38  
39

### 40 41 **Competing interests** 42

43 None declared.  
44  
45

### 46 47 **Ethics approval** 48

49 The survey was approved by the Ethics Committee of the Shandong Centre for Disease  
50 Control and Prevention, China.  
51  
52

### 53 54 **Data sharing statement** 55

56 No additional data available.  
57  
58  
59  
60

## REFERENCES

1. Ministry of Health. (2010) Annual Report on Health Statistics. Beijing: Peking Union Medical College Publishing House.
2. China CDC & China News. (2011) Salt reduction and hypertension prevention. China
3. Brown IJ, Tzoulaki I, Candeias V, et al. (2009) Salt intakes around the world: implications for public health international. *Int J Epidemiol* 38, 791–813.
4. He FJ, MacGregor GA. (2009) A comprehensive review on salt and health and current experience of worldwide salt reduction programs. *J Hum Hypertens* 23, 363–384.
5. Hoffmann IS, Cubeddu LX. (2009) Salt and the metabolic syndrome. *Nutr Metab Cardiovasc Dis* 19, 123–128.
6. Strazzullo P, D'Elia L, Kandala NB, et al. (2009) Salt intake, stroke and cardiovascular disease: meta-analysis of prospective studies. *BMJ* 339, b4567.
7. Bibbins-Domingo K, Chertow GM, Coxson PG, et al. (2010) Projected effect of dietary salt reductions on future cardiovascular disease. *N Engl J Med* 362, 590–599.
9. Beaglehole R, Bonita R, Horton R, et al. (2011) Priority actions for the non-communicable disease crisis. *Lancet* 377: 1438-1447.
10. Chan WG. Salt reduction initiatives in developed countries and lessons for China: a systematic review. Available at <http://hdl.handle.net/10722/145711>. Accessed 15 August 2012.
11. Centers for Disease Control and Prevention. (2012) CDC Grand Rounds: Dietary sodium reduction-time for choice. *MMWR*: 61(05), 89-91.
12. Anderson CA, Appel LJ, Okuda N, et al. (2010) Dietary source of sodium in China, Japan, the United Kingdom, the United States, women and men aged 40 to 59 years: the

- 1  
2  
3 INTERMAP study. *Journal of the American Dietetic Association* 110(5): 736-745.  
4  
5  
6 13. Hunter D. (1998) Biochemical indicators of dietary intake. In *Nutritional*  
7  
8 *Epidemiology*, pp. 174–243 [W Willett, editor]. Oxford: Oxford University Press.  
9  
10  
11 14. Longjian LIU, Katsumi IKEDA, and Yukio YAMORI. (2000) Twenty-four Hour  
12  
13 *Urinary Sodium and 3-Methylhistidine Excretion in Relation to Blood pressure in*  
14  
15 *Chinese: Results from the China-Japan Cooperative Research for the WHO-CARDIAC*  
16  
17 *study. Hypertens Res* 23, 152-157.  
18  
19  
20 15. National Centre for Social Research. An assessment of dietary sodium levels among  
21  
22 *adults (aged 19–64) in the UK general population in 2008, based on analysis of dietary*  
23  
24 *sodium in 24 hour urine samples. UK: Food Standards Agency, 2008.*  
25  
26  
27 16. Rose G, Stamler J. The INTERSALT Study: background, methods and main results. *J*  
28  
29 *Hum Hypertens* 1989; 3:283–88.  
30  
31  
32 17. Stamler J, Elliott P, Chan Q, for the INTERMAP Research Group (2003b).  
33  
34 *INTERMAP appendix tables. J Hum Hypertens*, 17:655–775.  
35  
36  
37 18 WHO Expert Committee (1982) *Prevention of Coronary Heart Disease. WHO*  
38  
39 *Technical Report Series no. 678. Geneva: WHO.*  
40  
41  
42 19. Chinese Nutrition Society (2007). *The Dietary Guidelines for Chinese Residents. Tibet,*  
43  
44 *China: Tibetan People’s Publishing House, 55.*  
45  
46 20. Zhou BF, Stamler J, Dennis B, et al. (2003) INTERMAP Research Group Nutrient  
47  
48 *intakes of middle-aged men and women in China, Japan, United Kingdom, and United*  
49  
50 *States in the late 1990s: the INTERMAP Study. J Hum Hypertens* 17, 623–630.  
51  
52  
53 21. Liu L, Liu L, Ding Y, et al. (2001) Ethnic and environmental differences in various  
54  
55 *markers of dietary intake and blood pressure among Chinese Han and three other*  
56  
57  
58  
59  
60

1  
2  
3 minority peoples of China: results from the WHO Cardiovascular Diseases and  
4 Alimentary Comparison (CARDIAC) Study. *Hypertens Res ClinExp* 24, 315–322.  
5  
6

7  
8 22. Hoffmann IS & Cubeddu LX (2009) Salt and the metabolic syndrome.  
9  
10 *NutrMetabCardiovasc Dis* 19, 123–128.  
11

12  
13 23. Luft FC (1998) Salt and hypertension at the close of the  
14 millenium. *WienKlinWochenschr* 110, 459–466.  
15  
16

17  
18 24. Hooper L, Bartlett C, Davey Smith G, et al. (2003) Reduced dietary salt for  
19 prevention of cardiovascular disease. *The Cochrane Database of Systematic Reviews*  
20 2003, issue 3 CD003656.  
21  
22

23  
24 25. Li N, Yan LL, Niu W, et al. (2013) A large-scale cluster randomized trial to determine  
25 the effects of community-based dietary sodium reduction--the China Rural Health  
26 Initiative Sodium Reduction Study. *Am Heart J*.166(5):815-22.  
27  
28

29  
30 26. YAN Li, LI Yan, WU Yang-fen. (2011) Reducing salt intake for hypertension control:  
31 related evidence and recommendation on strategies in China. *Chin J Epidemiol*  
32 32(12):1188-1191.  
33  
34  
35  
36  
37  
38  
39  
40  
41  
42  
43  
44  
45  
46  
47  
48  
49  
50  
51  
52  
53  
54  
55  
56  
57  
58  
59  
60



**Table 1 Distribution of included and excluded subjects**

| Gender | Including sample |       |       |       |       |       | Excluding sample |       |       |       |       |       |
|--------|------------------|-------|-------|-------|-------|-------|------------------|-------|-------|-------|-------|-------|
|        | Total            |       | Urban |       | Rural |       | Total            |       | Urban |       | Rural |       |
|        | n                | %     | n     | %     | n     | %     | n                | %     | n     | %     | n     | %     |
| Male   | 1076             | 52.21 | 342   | 16.59 | 734   | 35.61 | 65               | 52.85 | 18    | 14.63 | 47    | 38.21 |
| Female | 985              | 47.79 | 311   | 15.09 | 674   | 32.7  | 58               | 47.15 | 24    | 19.51 | 34    | 27.64 |
| Total  | 2061             | 100   | 653   | 31.68 | 1408  | 68.32 | 123              | 100   | 42    | 34.15 | 81    | 65.85 |

Table 2 Personal characteristics of the study sample by sex and age

|                               | Total(n=2061) |       |        | Male(n=1076) |       |        | Female(n=985) |       |        |
|-------------------------------|---------------|-------|--------|--------------|-------|--------|---------------|-------|--------|
|                               | Mean          | SD    | Median | Mean         | SD    | Median | Mean          | SD    | Median |
| <b>Age(years)</b>             | 41.23         | 13.99 | 39.00  | 41.12        | 14.32 | 39.00  | 41.34         | 13.62 | 39.00  |
| <b>Height(cm)</b>             | 163.00        | 8.84  | 162.60 | 168.78       | 7.02  | 169.20 | 157.27        | 6.23  | 157.20 |
| <b>BMI (kg/m<sup>2</sup>)</b> | 24.53         | 3.90  | 24.22  | 24.55        | 3.90  | 24.25  | 24.51         | 3.90  | 24.15  |
| <b>Overweight (%)</b>         | 33.72         |       |        | 34.67        |       |        | 32.69         |       |        |
| <b>Obese (%)</b>              | 18.00         |       |        | 18.03        |       |        | 17.97         |       |        |
| <b>Income (Yuan,%)</b>        |               |       |        |              |       |        |               |       |        |
| <5000                         | 52.24         |       |        | 51.1         |       |        | 53.45         |       |        |
| 5000-                         | 30.66         |       |        | 31.4         |       |        | 29.87         |       |        |
| 10000-                        | 8.35          |       |        | 8.27         |       |        | 8.44          |       |        |
| 15000-                        | 5.45          |       |        | 5.64         |       |        | 5.25          |       |        |
| 20000-                        | 3.29          |       |        | 3.57         |       |        | 2.99          |       |        |
| <b>Education (%)</b>          |               |       |        |              |       |        |               |       |        |
| illiteracy                    | 13.79         |       |        | 7.72         |       |        | 20.43         |       |        |
| junior                        | 19.09         |       |        | 17.58        |       |        | 20.73         |       |        |
| junior high                   | 42.06         |       |        | 47.72        |       |        | 35.87         |       |        |
| senior                        | 15.15         |       |        | 16.84        |       |        | 13.31         |       |        |
| junior college or above       | 9.91          |       |        | 10.14        |       |        | 9.65          |       |        |

**Table3 Urinary sodium excretion of Shandong adults aged 18-69 in 2011**  
(Weighted mean,SD, 95% CI, mmol/24h)

| Gender | Age-group | Urban |        |       |        | Rural  |      |        |       | Total  |        |      |        |      |        |        |
|--------|-----------|-------|--------|-------|--------|--------|------|--------|-------|--------|--------|------|--------|------|--------|--------|
|        |           | N     | Mean   | SD    | 95%CI  | N      | Mean | SD     | 95%CI | N      | Mean   | SD   | 95%CI  |      |        |        |
| Male   | 18-29     | 85    | 241.64 | 18.23 | 194.77 | 288.51 | 196  | 244.81 | 9.85  | 222.52 | 267.10 | 281  | 243.88 | 8.72 | 225.17 | 262.58 |
|        | 30-39     | 91    | 255.88 | 12.30 | 224.25 | 287.50 | 185  | 247.19 | 9.72  | 225.21 | 269.17 | 276  | 249.99 | 7.79 | 233.30 | 266.69 |
|        | 40-49     | 65    | 233.33 | 17.89 | 187.35 | 279.31 | 139  | 247.90 | 7.48  | 230.99 | 264.82 | 204  | 243.59 | 7.40 | 227.72 | 259.47 |
|        | 50-59     | 51    | 263.00 | 12.72 | 230.28 | 295.71 | 111  | 251.36 | 12.64 | 222.78 | 279.95 | 162  | 255.27 | 9.44 | 235.02 | 275.52 |
|        | 60-69     | 50    | 239.00 | 14.74 | 201.12 | 276.88 | 103  | 232.24 | 12.62 | 203.69 | 260.79 | 153  | 234.42 | 9.82 | 213.36 | 255.49 |
|        | Subtotal  | 342   | 246.81 | 12.46 | 214.77 | 278.85 | 734  | 245.96 | 8.22  | 227.38 | 264.55 | 1076 | 246.23 | 6.87 | 231.49 | 260.96 |
| Female | 18-29     | 79    | 200.77 | 13.37 | 166.40 | 235.14 | 173  | 225.93 | 7.26  | 209.51 | 242.35 | 252  | 219.01 | 6.69 | 204.66 | 233.37 |
|        | 30-39     | 79    | 236.43 | 8.99  | 213.31 | 259.54 | 165  | 234.70 | 9.62  | 212.94 | 256.46 | 244  | 235.27 | 7.11 | 220.01 | 250.53 |
|        | 40-49     | 59    | 236.92 | 12.94 | 203.65 | 270.18 | 131  | 231.88 | 12.22 | 204.25 | 259.52 | 190  | 233.46 | 9.43 | 213.24 | 253.69 |
|        | 50-59     | 53    | 213.23 | 10.24 | 186.91 | 239.54 | 111  | 245.28 | 11.41 | 219.48 | 271.09 | 164  | 234.73 | 8.73 | 216.01 | 253.45 |
|        | 60-69     | 41    | 200.29 | 11.23 | 171.42 | 229.15 | 94   | 221.79 | 7.72  | 204.32 | 239.26 | 135  | 215.48 | 6.34 | 201.88 | 229.07 |
|        | Subtotal  | 311   | 219.97 | 9.07  | 196.66 | 243.29 | 674  | 232.32 | 7.72  | 214.85 | 249.79 | 985  | 228.52 | 5.99 | 215.67 | 241.37 |
| Total  | 18-29     | 164   | 222.94 | 10.65 | 195.56 | 250.32 | 369  | 235.72 | 7.63  | 218.46 | 252.98 | 533  | 232.08 | 6.15 | 218.89 | 245.26 |
|        | 30-39     | 170   | 246.19 | 9.86  | 220.85 | 271.54 | 350  | 241.06 | 9.11  | 220.44 | 261.68 | 520  | 242.73 | 6.98 | 227.75 | 257.71 |
|        | 40-49     | 124   | 235.11 | 12.06 | 204.10 | 266.11 | 270  | 240.30 | 8.95  | 220.05 | 260.56 | 394  | 238.72 | 7.16 | 223.37 | 254.07 |
|        | 50-59     | 104   | 238.44 | 7.54  | 219.05 | 257.83 | 222  | 248.32 | 9.26  | 227.36 | 269.27 | 326  | 245.03 | 6.68 | 230.70 | 259.37 |
|        | 60-69     | 91    | 220.68 | 12.40 | 188.80 | 252.56 | 197  | 226.94 | 8.61  | 207.45 | 246.43 | 288  | 225.01 | 7.05 | 209.89 | 240.14 |
|        | Subtotal  | 653   | 233.82 | 9.90  | 208.36 | 259.28 | 1408 | 239.30 | 7.52  | 222.28 | 256.33 | 2061 | 237.61 | 5.98 | 224.77 | 250.44 |

**Table4 Salt intake of Shandong adults aged 18-69 in 2011**  
**(Weighted mean, SD,95%CI, grams/24h)**

| Gender | Age-group | Urban |       |      |             | Rural |       |      |             | Total |       |      |             |
|--------|-----------|-------|-------|------|-------------|-------|-------|------|-------------|-------|-------|------|-------------|
|        |           | N     | Mean  | SD   | 95%CI       | N     | Mean  | SD   | 95%CI       | N     | Mean  | SD   | 95%CI       |
| Male   | 18-29     | 85    | 14.14 | 1.07 | 11.39 16.88 | 196   | 14.32 | 0.58 | 13.02 15.63 | 281   | 14.27 | 0.51 | 13.17 15.36 |
|        | 30-39     | 91    | 14.97 | 0.72 | 13.12 16.82 | 185   | 14.46 | 0.57 | 13.17 15.75 | 276   | 14.62 | 0.46 | 13.65 15.60 |
|        | 40-49     | 65    | 13.65 | 1.05 | 10.96 16.34 | 139   | 14.50 | 0.44 | 13.51 15.49 | 204   | 14.25 | 0.43 | 13.32 15.18 |
|        | 50-59     | 51    | 15.39 | 0.74 | 13.47 17.30 | 111   | 14.70 | 0.74 | 13.03 16.38 | 162   | 14.93 | 0.55 | 13.75 16.12 |
|        | 60-69     | 50    | 13.98 | 0.86 | 11.77 16.20 | 103   | 13.59 | 0.74 | 11.92 15.26 | 153   | 13.71 | 0.57 | 12.48 14.95 |
|        | Subtotal  | 342   | 14.44 | 0.73 | 12.56 16.31 | 734   | 14.39 | 0.48 | 13.30 15.48 | 1076  | 14.40 | 0.40 | 13.54 15.27 |
| Female | 18-29     | 79    | 11.75 | 0.78 | 9.73 13.76  | 173   | 13.22 | 0.42 | 12.26 14.18 | 252   | 12.81 | 0.39 | 11.97 13.65 |
|        | 30-39     | 79    | 13.83 | 0.53 | 12.48 15.18 | 165   | 13.73 | 0.56 | 12.46 15.00 | 244   | 13.76 | 0.42 | 12.87 14.66 |
|        | 40-49     | 59    | 13.86 | 0.76 | 11.91 15.81 | 131   | 13.57 | 0.71 | 11.95 15.18 | 190   | 13.66 | 0.55 | 12.47 14.84 |
|        | 50-59     | 53    | 12.47 | 0.60 | 10.93 14.01 | 111   | 14.35 | 0.67 | 12.84 15.86 | 164   | 13.73 | 0.51 | 12.64 14.83 |
|        | 60-69     | 41    | 11.72 | 0.66 | 10.03 13.41 | 94    | 12.97 | 0.45 | 11.95 14.00 | 135   | 12.61 | 0.37 | 11.81 13.40 |
|        | Subtotal  | 311   | 12.87 | 0.53 | 11.50 14.23 | 674   | 13.59 | 0.45 | 12.57 14.61 | 985   | 13.37 | 0.35 | 12.62 14.12 |
| Total  | 18-29     | 164   | 13.04 | 0.62 | 11.44 14.64 | 369   | 13.79 | 0.45 | 12.78 14.80 | 533   | 13.58 | 0.36 | 12.81 14.35 |
|        | 30-39     | 170   | 14.40 | 0.58 | 12.92 15.89 | 350   | 14.10 | 0.53 | 12.90 15.31 | 520   | 14.20 | 0.41 | 13.32 15.08 |
|        | 40-49     | 124   | 13.75 | 0.71 | 11.94 15.57 | 270   | 14.06 | 0.52 | 12.87 15.24 | 394   | 13.97 | 0.42 | 13.07 14.86 |
|        | 50-59     | 104   | 13.95 | 0.44 | 12.81 15.08 | 222   | 14.53 | 0.54 | 13.30 15.75 | 326   | 14.33 | 0.39 | 13.50 15.17 |
|        | 60-69     | 91    | 12.91 | 0.73 | 11.05 14.77 | 197   | 13.28 | 0.50 | 12.14 14.42 | 288   | 13.16 | 0.41 | 12.28 14.05 |
|        | Subtotal  | 653   | 13.68 | 0.58 | 12.19 15.17 | 1408  | 14.00 | 0.44 | 13.00 15.00 | 2061  | 13.90 | 0.35 | 13.15 14.65 |

1  
2  
3  
4  
5  
6  
7  
8 **Estimating daily salt intake based on 24-hour urinary sodium excretion in adults**  
9  
10 **aged 18–69 years in Shandong, China**

Formatted: Suppress Endnotes, Width: 8.5",  
Height: 11", Header distance from edge: 0.5",  
Footer distance from edge: 0.5"

11 *Corresponding Author:*

12 Dr. Zhen-qiang BI

13 Shandong Center for Disease Control and Prevention

14 16992# Jingshi RD., Jinan, Shandong, PR of China250014

15 TEL: 0086-531-82679601

Formatted: French (France)

16 FAX: 0086-531-82679620

17 E-mail: [bizhenqiang@gmail.com](mailto:bizhenqiang@gmail.com)

Formatted: French (France)

Formatted: French (France)

Field Code Changed

18 Authors: Ji-yu ZHANG<sup>1</sup>, Liu-xia YAN<sup>2</sup>, Jun-li TANG<sup>1</sup>, Ji-xiang MA<sup>2</sup>, Xiao-lei GUO<sup>1</sup>,  
19 Wen-hua ZHAO<sup>3</sup>, Xiao-fei ZHANG<sup>4</sup>, Jian-hong Li<sup>2</sup>, Jie Chu<sup>1</sup>, Zhen-qiang BI<sup>1\*</sup>

20 Affiliations:

21 1. Shandong Center for Disease Control and Prevention, 250014 Jinan, China

22 2. National Center for Chronic and Non-communicable Disease Control and Prevention

23 Chinese Center for Disease Control and Prevention, 100050 Beijing, China,

24 3. Chinese Center for Disease Control and Prevention, 102206 Beijing, China

25 4. Department of Clinical Epidemiology and Biostatistics, Second Affiliated Hospital of

26 Zhejiang University College of Medicine, 310009 Hangzhou, China

27 TABLES: 4

28 FIGURES: 0

29 SUPPLEMENTARY: 0

30 WORD COUNT: 1906

KEY WORDS: Salt, sodium, 24-hour urine, cardiovascular disease, China

For peer review only

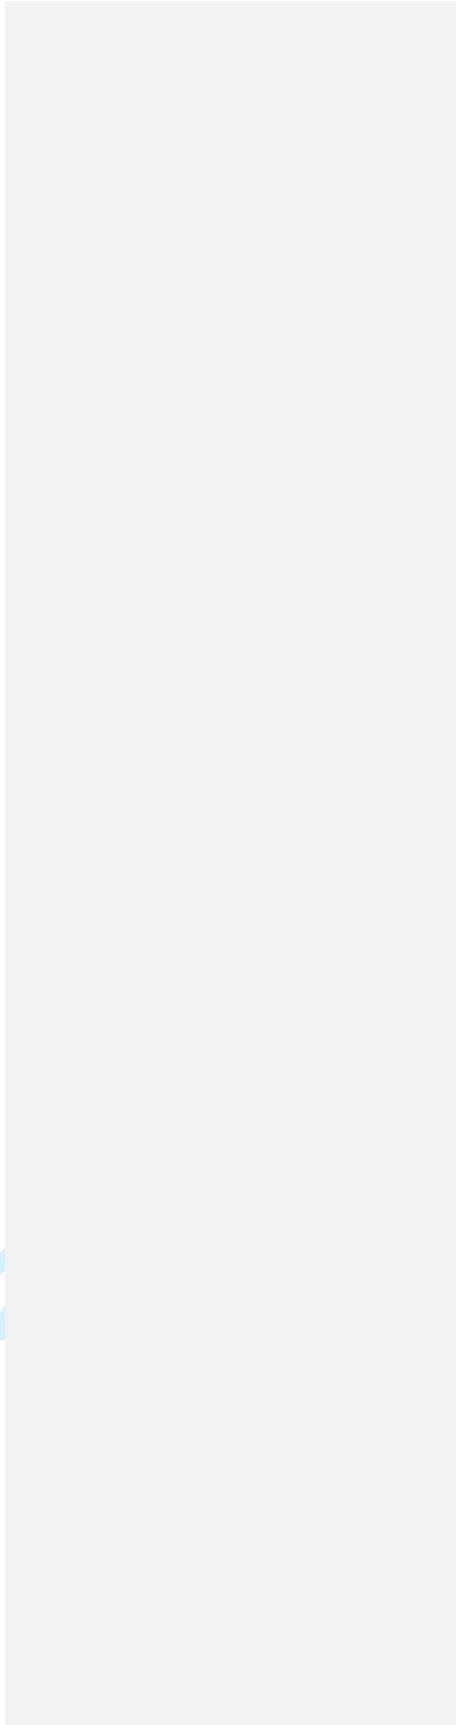

1  
2  
3  
4  
5  
6  
7  
8  
9  
10  
11  
12  
13  
14  
15  
16  
17  
18  
19  
20  
21  
22  
23  
24  
25  
26  
27  
28  
29  
30  
31  
32  
33  
34  
35  
36  
37  
38  
39  
40  
41  
42  
43  
44  
45  
46  
47  
48  
49  
50  
51  
52  
53  
54  
55  
56  
57  
58  
59  
60

## ABSTRACT

**Objective:** ~~Based on 24-h urinary sodium excretion, to~~ estimate the daily salt intake among residents aged 18–69 years in Shandong, China. ~~in the adult Shandong population (aged 18–69 years) in 2011 based on 24-h urinary sodium excretion in China.~~

**Setting:** Twenty ~~selected~~ counties/districts in Shandong stratified by geographic ~~distribution~~ region (Eastern, Central Southern, and North Western) and residence ~~type~~ (urban versus rural), Shandong, China.

**Participants:** ~~We Among~~ randomly selected 2184 adults, ~~2061 provided and obtained~~ usable 24 h urine samples ~~from 2061~~. Urine volume <500 mL or creatinine level <3.81 mmol (mean-2SD: day/weight (kg)) for men and 4.57 mmol (mean-2SD: day/weight (kg)) for women were ~~considered deficient to ensure the completeness of the urine sample excluded from analysis. Inaccurate urine collections and extreme outliers for urinary creatinine level were excluded from the analysis.~~

**Results:** The mean sodium level excreted over 24 h was 237.61 mmol (95% CI: 224.77–250.44) mmol. Overall, the estimated mean salt intake was 13.90 g/day (95% CI: 13.15–14.65). The mean salt intake ~~by among~~ rural residents was ~~more higher~~ than that of urban residents (14.00 g vs 13.68 g;  $p < 0.01$ ). Salt intake in men was higher than that in women (14.40 g vs 13.37 g;  $p < 0.01$ ). Approximately 96% of the survey participants had a dietary salt intake of  $\geq 6$  g/day.

**Conclusion:** The salt intake in Shandong is alarmingly higher than the current recommended amount (6 g/day). Thus, effective interventions to reduce ~~the~~ salt intake

1  
2  
3  
4  
5  
6  
7  
8 levels to combat the increasing burden of non-communicable diseases need to be  
9 developed and implemented.  
10

### 11 12 13 14 **Strengths and limitations**

15  
16 The gold standard 24-h urinary sodium excretion was used to estimate salt intake with  
17 ~~standard~~ strict exclusion criteria to ensure data quality ~~checks for completeness of the~~  
18 ~~specimens based on urine volume and the level of urine creatinine excreted.~~ A limitation  
19 of the study was that only a single 24-hour urine collection was obtained from each  
20 participant. A single collection will less accurately reflect 24-hour sodium intake than  
21 will several collections. However, the day-to-day variation in sodium excretion can vary  
22 in both directions, so it is unlikely that the findings overstated the inaccuracy of the claim  
23 of a low sodium intake. ~~A potential limitation of this study is that the sample only~~  
24 ~~comprised Chinese adults aged 18–69 years in Shandong; hence, the results cannot be~~  
25 ~~extrapolated to other groups.;~~ ~~The 24 h urinary sodium excretion method does not account~~  
26 ~~for electrolyte loss via routes other than the kidneys, and therefore will may tend to~~  
27 ~~slightly underestimate the true amount of salt intake.~~  
28  
29  
30  
31  
32  
33  
34  
35  
36  
37  
38

39  
40  
41  
42  
43  
44  
45  
46  
47  
48  
49  
50  
51  
52  
53  
54  
55  
56  
57  
58  
59  
60  
Formatted: English (U.S.)



## BACKGROUND

In China, hypertension is a major contributor to cardiovascular disease (CVD), which accounts for about 40% of ~~all~~the deaths [1] and 23% of the health care costs [2]. Evidence suggests that a high level of salt intake is associated with high blood pressure (BP) and a greater risk of stroke and CVD [3–6]. The National China Nutrition Surveys (1982, 1992, and 2002) and the Chinese Behavioral Risk Factor Surveillance indicated that approximately 80% of Chinese individuals consume salt ~~4~~-more than the upper limit of the recommended maximum-salt (sodium chloride) intake ~~of (6 g/day)-recommended~~ by the Chinese Nutritional Society (2007). In 2010, the ~~estimated~~-mean salt intake among the Chinese was estimated to be 9.1 g/day in urban areas, and 11.5 g/day in rural areas [1]. ~~The Chinese diet is high in sodium.~~

Reducing salt intake is one of the easiest, most ~~efficient~~efficient and cost-effective ways to reduce the burden of CVD and health care costs, which would result in a ~~major~~ substantial improvement in public health [1, 7]. Globally, dietary sodium reduction has been recommended as a major ~~intervention-strategy method~~-for the prevention and control of non-communicable diseases [8]. Several countries including Japan, the United Kingdom (UK), Finland, Portugal, and the United States (US), have succeeded in reducing the population-wide sodium intake [9–11]. ~~In contrast to~~Unlike in Western countries, a major challenge to ~~the efforts to~~-reduce sodium intake in China is that ~~a-the~~ majority of sodium comes from the salt added to home cooked food rather than ~~in-from~~ commercially processed foods. A recent study suggested that most of the dietary sodium intake (76%) in China could be traced to the~~was attributed to~~ salt added during home

1  
2  
3  
4  
5  
6  
7  
8 cooking [12]. In contrast, processed foods contributed heavily to sodium intake in the UK  
9 (95%) and the US (71%) [12]. ~~Therefore, efforts to reduce sodium intake in China. To~~  
10 ~~prevent and control hypertension and improve health, efforts to remove excess sodium~~  
11 ~~from diet in China~~ should focus on reducing the sodium level in home cooked foods.  
12  
13  
14  
15  
16

17  
18 Shandong Province is one of the most populous provinces in China. Sodium intake ~~by~~  
19 ~~among~~ most Shandong residents considerably exceeds the recommended limit. In 2002,  
20 the mean daily salt intake was 12.6 g and the prevalence of hypertension was 25.1%.  
21  
22 High salt intake has caused huge economic loss [2]. In 2011, the Chinese Ministry of  
23 Health (MOH) selected Shandong province as a national pilot area and the  
24 Shandong MOH Action on Salt and Hypertension (SMASH) Project was set up to reduce  
25 the sodium level in the Chinese diet. To help develop effective interventions for the  
26 SMASH Project, a baseline survey was conducted in 2011 to assess salt consumption and  
27 the prevalence of hypertension among the residents in Shandong. The measurement of  
28 24-h urinary sodium excretion is considered the gold standard method for obtaining data  
29 on the sodium intake in population surveys [1]. However, in China, few studies have been  
30 conducted on the salt intake of the general population based on the 24-h urinary sodium  
31 excretion method. This study analyses the baseline survey to estimate the daily intake of  
32 dietary sodium among the general adult Shandong population (aged 18–69 years) based  
33 on 24-h urinary sodium excretion. ~~establish public health measures, and enable later~~  
34 ~~monitoring and evaluation of the strategy.~~  
35  
36  
37  
38  
39  
40  
41  
42  
43  
44  
45  
46  
47  
48  
49

## 50 51 **METHODS**

52  
53  
54  
55  
56  
57  
58  
59  
60

1  
2  
3  
4  
5  
6  
7  
8 A cross-sectional survey was conducted in Shandong province from June 2011 to July  
9 2011. Multi-stage (four-stage) cluster sampling was used to select a provincially  
10 representative sample of the adult population (aged 18–69 years). Briefly, a total of 140  
11 counties/districts in Shandong province were stratified by geographic ~~distribution~~  
12 ~~region~~ (Eastern, Central Southern, and North Western) and residence ~~type~~ (urban versus  
13 rural). Twenty counties/districts were selected (12 ~~rural~~ counties and 8 ~~urban~~ districts) ~~for~~  
14 ~~this study~~. Using a proportional probability sampling (PPS) method, three townships (in  
15 rural areas) or two ~~streets-suburbs~~ (in urban areas) were chosen from each selected county  
16 or district. The PPS method was also used to select one village/~~neighbourhoodcommunity~~  
17 from each sampled township/~~suburbstreet~~. ~~From each chosen village/community,~~  
18 ~~Random sampling was used to select~~ 42 subjects ~~were randomly chosen resulting in a~~  
19 ~~total from each chosen village/neighbourhood. A total sample size~~ of 2184 subjects ~~were~~  
20 ~~sampled~~.

21  
22  
23  
24  
25  
26  
27  
28  
29  
30  
31  
32  
33  
34  
35 ~~A face-to-face interview using a close-ended questionnaire was conducted by t~~ Trained  
36 public health professionals with experience in conducting interviews for similar health  
37 surveys ~~administered a face to face, close-ended questionnaire. The questions were used~~  
38 to collect information on demographics (gender, age, education, and income).

39  
40  
41  
42  
43  
44  
45 ~~A single, timed 24 h urine collection was performed for the estimation of electrolyte~~  
46 ~~excretion.~~ All subjects were ~~given written and verbal instructions asked to provide to~~  
47 ~~collect a 24-h urine samples, for which they were given written and verbal instructions.~~  
48 The first urine of the day was discarded and all urine ~~collected~~ over the following 24 h  
49  
50  
51  
52  
53  
54  
55  
56  
57  
58  
59  
60

1  
2  
3  
4  
5  
6  
7  
8 was collected in provided bottles~~that were provided~~. All bottles from the same participant  
9 were carefully mixed and t~~The urine~~-volume of urine was measured. Then ,the sample  
10 was carefully mixed, and a 20 mL aliquot of mixed urine was ~~withdrawn~~taken and -  
11 Aliquots were~~was~~ immediately frozen at -20°C and sent to the laboratory for analysis.  
12  
13  
14  
15

16  
17  
18 The samples were first assayed for c~~The sodium concentration was determined by the~~  
19 direction selective electrode method. Creatinine concentration was determined using the  
20 picric acid method (ADICON Clinical Laboratory; CAP accredited). Samples with a total  
21 daily Urine-volume <500 mL or creatinine level <3.81 mmol (mean-2SD: day/weight (kg))  
22 for men and 4.57 mmol (mean-2SD: day/weight (kg)) for women were considered  
23 deficient to ensure the completeness of the urine sample to be incomplete or inaccurate  
24 urine collection and were thus excluded from data analysis. ~~Inaccurate urine collections~~  
25 and extreme outliers for urinary creatinine level were excluded from the analysis. ~~The~~  
26 sodium concentration was determined by using the direction selective electrode method.  
27 Daily salt intake was estimated by assessing 24-h urinary sodium excretion based on the  
28 assumption that all sodium was ingested in the form of sodium chloride.  
29  
30  
31  
32  
33  
34  
35  
36  
37  
38  
39  
40

41 Height, weight, and waist circumference were measured in all subjects. Of 2184 subjects,  
42 2061 subjects with complete data were included in this analysis (response rate,  
43 94.4%). Educational level and annual household income were used as indicators for social  
44 economic status. We divided participants into five groups based on education level: no  
45 education, primary school, junior high school, senior high school, college, and higher  
46 education. Annual household income was classified into high, middle, and low, according  
47  
48  
49  
50  
51  
52  
53  
54  
55  
56  
57  
58  
59  
60

1  
2  
3  
4  
5  
6  
7  
8 to tertiles. Body mass index (BMI= weight (Kg) / height (m)<sup>2</sup>; relative weight) ,which is a  
9 simple measure of obesity, was calculated as weight divided by the square of height  
10 (kg/m<sup>2</sup>). Individuals with a BMI ≥24 kg/m<sup>2</sup> ≤BMI but <28 kg/m<sup>2</sup> were defined as being  
11 overweight and those with a BMI ≥28 kg/m<sup>2</sup> were considered obese.  
12  
13  
14  
15  
16  
17  
18  
19

20 The survey was granted ethical approval by the Ethics Committee of the Shandong  
21 Centre for Disease Control and Prevention, and all participants provided written informed  
22 consent to participate in this study.  
23  
24  
25  
26  
27

28 Educational level and annual household income were used as indicators for social  
29 economic status. We divided participants into five groups based on education level: no  
30 education, primary school, junior high school, senior high school, college, and higher  
31 education. Annual household income was classified into high, middle, and low, according  
32 to tertiles. Body mass index (BMI, relative weight), which is a simple measure of obesity,  
33 was calculated as weight divided by the square of height (kg/m<sup>2</sup>). Individuals with 24  
34 kg/m<sup>2</sup> ≤BMI <28 kg/m<sup>2</sup> were defined as being overweight and those with BMI ≥28 kg/m<sup>2</sup>  
35 were considered obese.  
36  
37  
38  
39  
40  
41  
42  
43

44 Statistical analyses were performed using the Statistical Analysis System (SAS) version  
45 9.3 (SAS Institute Inc., Cary, North Carolina, USA).  $P < 0.05$  was considered significant.  
46  
47

48 All the results shown were weighted by the total demography in Shandong province.  
49 Survey weight (total weight = design weight × post-stratification weight) was used to  
50 calculate weighted proportions. Design weight was calculated to account for different  
51  
52  
53  
54  
55  
56  
57  
58  
59  
60

1  
2  
3  
4  
5  
6  
7  
8 factors including cluster design, strata, and individual factors. The population data  
9  
10 from Shandong province was used to generate the post-stratification weight. Means and  
11  
12 95% CIs were calculated for all variables and ~~the~~ normality of the data was assessed.  
13  
14 Analysis of variance and ~~the~~ chi-square test were used to test the significance of  
15  
16 differences between groups.  
17

18  
19  
20 ~~The survey~~ This study received ~~was granted~~ ethical approval ~~by~~ from the Ethics  
21  
22 Committee of the Shandong Centre for Disease Control and Prevention. A, and all  
23  
24 participants provided written informed consent to participate in this study.  
25

## 26 27 28 29 **RESULTS**

### 30 31 **Study subjects**

32  
33 A total of 2061 provided urine specimens ~~were eligible for analysis~~ out of which ~~51-123~~  
34  
35 samples were further excluded from analysis because of incomplete or inaccurate urine  
36  
37 collection ~~that were inaccurate urine collections or extreme outliers for urinary~~  
38  
39 creatinine level ~~were excluded~~. There was no significant ~~association~~ differences between  
40  
41 included subjects ~~sample inclusion~~ and excluded subjects ~~in on~~ in terms of age, sex, and  
42  
43 residence type ( $t = 1.3152$ ,  $p > 0.05$ ;  $\chi^2 = \text{square}0.1402$ ,  $p > 0.05$ ;  $\chi^2 = \text{square}0.1232$ ,  $p > 0.05$ ;  
44  
45 Table 1).  
46  
47  
48

49  
50 The characteristics of each subpopulation are summarised in table 2. Of 2061 eligible  
51  
52 samples, 1076 belonged to men ~~were~~ male (52.21%) and 985 ~~to~~ were women (47.79%).  
53  
54  
55  
56  
57  
58  
59  
60

1  
2  
3  
4  
5  
6  
7  
8 The mean age, height, and BMI were 41.23 years, 163.00 cm, and 24.22 kg/m<sup>2</sup>,  
9 respectively. There were no significant differences in age and BMI between men and  
10 women ( $t = 0.34$ ,  $p > 0.05$ ;  $t = 0.29$ ,  $p > 0.05$ ). However, men were significantly taller  
11 than women ( $t = 37.65$ ,  $p < 0.05$ ). The prevalence of overweight and obese individuals  
12 was 33.72% and 18.00%, respectively, with no significant differences between men and  
13 women ( $\chi^2 = 0.90$ ,  $p > 0.05$ ;  $\chi^2 = 0.001$ ,  $p > 0.05$ ). Of the tested subjects, 82.90% had an  
14 income <10,000 RMB and 42.60% were had an education level of junior high school  
15 graduates.  
16  
17  
18  
19  
20  
21  
22  
23

#### 24 25 26 **Salt intake**

27 The 24-h urinary sodium level ranged from 22.05 to 750.79 mmol, with a mean of 231.10  
28 mmol, and 258.44 mmol at Q3, and 180.87 mmol at Q1. Tables 3 and 4 show the 24-h  
29 urinary sodium excretion and estimated daily salt intake for each subpopulation. The  
30 mean sodium level excreted over 24 h was 237.61 mmol (95%CI: 224.77–250.44 mmol),  
31 which corresponds to 13.90 g NaCl (95%CI: 13.15–14.65 g). The mean salt intake by  
32 rural residents was more than that of urban residents (14.00 g vs 13.68 g;  $p < 0.01$ ). Salt  
33 intake in men was higher than that in women (14.40 g vs 13.37 g;  $p < 0.01$ ). There were no  
34 obvious significant differences in the salt intake between age groups.  
35  
36  
37  
38  
39  
40  
41  
42  
43  
44

#### 45 46 **DISCUSSION**

47 It can be veryis challenging to accurately estimate sodium intake. Indeed because –it is  
48 very difficult to know the exact amount of salt added during cooking (even in restaurants)  
49 and at the table. Further, it is also difficult hard to estimate the amount of salt that has  
50  
51  
52  
53  
54  
55  
56  
57  
58  
59  
60

1  
2  
3  
4  
5  
6  
7  
8 been left on the plate, and to determine the salt content in food and drinking water [1].

9  
10 ~~Thus~~Therefore, ~~in agreement with~~ as suggested by a number of reports [1,3,4,13], the  
11 best method to determine salt intake is ~~by~~ measuring the amount excreted ~~using~~ in a 24-h  
12 urinesample. In China, very few studies have measured the salt intake using 24-h urinary  
13 excretion and none have ~~been performed using~~ used a representative sample  
14 ~~representative of the entire Chinese population~~. Liu et al reported an intake of 188.4  
15 mmol/day (corresponding to 11.02 gNaCl) in a population of 48–56-year-old individuals  
16 in China [14]; ~~this a~~ value ~~is~~ much smaller than that obtained in the present study (224.77  
17 mmol/24 h, 13.9 g). The current study indicates that the sodium intake is very high in a  
18 representative population of Shandong adults, higher than that in a UK population aged  
19 19–64 years (148 mmol) [15]. Salt intake by men and women was found to be 246.23  
20 mmol/day and 228.52 mmol/day, respectively, ~~which~~ is higher than that in the population  
21 in Toyama (men, 224 mmol/day; women, 201 mmol/day) [11, 16], the US (men, 180–190  
22 mmol/day; women, 130–150 mmol/day) [17], and the UK (men, 161 mmol/day; women,  
23 127 mmol/day) [17].  
24  
25  
26  
27  
28  
29  
30  
31  
32  
33  
34  
35  
36  
37  
38

39 The salt intake in China is double the upper limit of recommended intake of 80–110  
40 mmol/day (5–6 g salt/day) ~~issued~~ by the World Health Organisation in 1982 [18], ~~which~~  
41 ~~has led to the adoption of and in~~ the China Nutrition Recommendations [19]. In China, the  
42 high salt intake is ~~higher~~ mainly due to the high consumption of soya sauce and the  
43 tradition of adding a large amount of salt to the food both during cooking and at the table  
44 [3,20,21]. ~~As reported~~ Consistent with other ~~in several~~ studies [3, 20, 22], salt intake in  
45 men (14.4 g) was higher than that in women (13.9 g) in Shandong possibly because of the  
46  
47  
48  
49  
50  
51  
52  
53  
54  
55  
56  
57  
58  
59  
60



1  
2  
3  
4  
5  
6  
7  
8 higher overall food intake by men and the differences in food habits between men and  
9 women[3,20,22]. In ~~majority of most~~ populations, salt intake is high and well above the  
10 daily recommended values. Now resident health records are being established in  
11 Shandong province, it is necessary to evaluate and record the salt intake for individuals  
12 by FFQ or other method. ~~Especially during following up among the chronic disease~~  
13 patients and high risk ~~individuals population~~, it is very important to focus on the salt  
14 intake and persuade them to change the habit of high salt intake.  
15  
16  
17  
18  
19  
20  
21  
22  
23

Formatted: English (U.S.)

24 Strong and consistent evidence from animal studies, clinical trials, and epidemiological  
25 data from within and across populations ~~implicatesuggests~~ high salt intake ~~is~~ an  
26 important risk factor for high BP among hypertensive and normotensive individuals[23].  
27 ~~A-~~ additionally, high salt intake is also associated with increased risk of coronary heart  
28 disease and stroke[24]. ~~Given that health problems such as hypertension [23] and CVD~~  
29 ~~[24] are associated with excessive salt intake~~Therefore, public health initiatives are  
30 needed to ~~help~~ reduce salt consumption [3,4] and ~~consequently in turn~~ lower the burden  
31 of CVDs and increase life expectancy. The government needs to focus and resolve this  
32 ~~Thesevere situationg~~. ~~Saltsalt~~ reduction must be undertaken. Health ~~taken~~. ~~H~~education  
33 and promotion ~~usingby~~ ~~based onthe~~ media campaigns, as well as timely  
34 community-based initiatives to limit the amount of salt added to food by individuals  
35 would increase public awareness. Meanwhile, ~~it~~ is necessary to collaborate with  
36 restaurants ~~and food industries~~ to reduce excessive salt ~~commonly included in various~~  
37 ~~dishes~~. ~~With increasing westernisation of cultures, it is essential to ensure low levels of~~  
38 ~~salt in processed foods~~. ~~Such public health approaches can be simple, less at low costly,~~  
39  
40  
41  
42  
43  
44  
45  
46  
47  
48  
49  
50  
51  
52  
53  
54  
55  
56  
57  
58  
59  
60

1  
2  
3  
4  
5  
6  
7  
8 and effective. Indeed, campaigns ~~are~~ such as the SMASH and the China Rural Health  
9 Initiative Sodium Reduction Study are already underway [25]. As reported by Li et al  
10 [26], in China, measures for salt reduction will include government initiatives, health  
11 education and promotion, promotion of low sodium salt in ~~food~~ processing companies  
12 and restaurants. In Shandong, education ~~through~~ radio, television, internet, and movies is  
13 underway to improve the knowledge of the residents about low-salt diets. To bring about  
14 behavioural changes, salt spoons have been provided for every family in the entire  
15 province. Key groups comprising of governors, medical personnel, and stakeholders from  
16 the food processing enterprise and restaurants are trained. Local standards for the amount  
17 of salt in soy sauce pickles and other dishes in the cuisine of Shandong have been  
18 formulated. The results from the present study could be useful in these endeavours.  
19  
20  
21  
22  
23  
24  
25  
26  
27  
28  
29  
30

31 ~~There are certain several limitations in this study. First, the sample only included Chinese~~  
32 ~~adults aged 18–69 years in Shandong; hence, the results cannot may not be extrapolated to~~  
33 ~~other groups. Because behaviour is formed during childhood, salt intake should be~~  
34 ~~evaluated and health education should be administered during this period. Second,~~  
35 ~~available the 24 h urinary salt excretion method does not account for electrolyte loss via~~  
36 ~~routes other than the kidneys, such as the skin and respiratory tract, and will therefore tend~~  
37 ~~to thus may slightly underestimate the true intake.~~  
38  
39  
40  
41  
42  
43  
44

45 A limitation of the study was that only a single 24-hour urine collection was obtained  
46 from each participant. A single collection will less accurately reflect 24-hour sodium  
47 intake than will several collections. However, the day-to-day variation in sodium  
48 excretion can vary in both directions, so it is unlikely that the findings overstated the  
49  
50  
51  
52  
53  
54  
55  
56  
57  
58  
59  
60

1  
2  
3  
4  
5  
6  
7  
8 [inaccuracy of the claim of a low sodium intake.](#)  
9

### 10 **Acknowledgments**

11  
12 The authors ~~would like to~~thank all the investigators from the national, provincial, and  
13  
14 county level CDCs, and allthe participants of the survey.  
15

### 16 17 18 **Contributors**

19  
20 Conceived and designed the experiments: Jiyu Zhang, Liuxia Yan, Junli Tang, Zhenqiang  
21 Bi. Performed the experiments: Jiyu Zhang, Junli Tang, Zhenqiang Bi. Analysed the data:  
22 Jiyu Zhang, Junli Tang, Zhenqiang Bi. Contributed reagents/materials/analysis tools: Jiyu  
23 Zhang, Jixiang Ma, XiaoleiGuo, Wen-hua Zhao, Xiaofei Zhang, Jianhong Li, Jie Chu.  
24  
25 Wrote the manuscript: Jiyu Zhang, Liuxia Yan, Junli Tang, Zhenqiang Bi.  
26  
27  
28  
29

### 30 31 **Funding**

32  
33 The survey was supported by funds from the Chinese Centre for Disease Control and  
34 Prevention (China CDC), National Centre for Non-Communicable and Chronic Disease  
35 Control and Prevention (NCNCD, China CDC),and the Technical Development Plan in  
36 Shandong (implemented by Shandong CDC, Grant number: 2012GSF11828).  
37  
38  
39  
40  
41

### 42 43 **Competing interests**

44  
45 None declared.  
46  
47

### 48 49 **Ethics approval**

50  
51 The survey was approved by the Ethics Committee of the Shandong Centre for Disease  
52  
53  
54  
55  
56  
57  
58  
59  
60

1  
2  
3  
4  
5  
6  
7  
8 Control and Prevention, China.  
9

10  
11  
12 **Data sharing statement**  
13

14 No additional data available.  
15  
16  
17  
18  
19  
20  
21  
22  
23  
24  
25  
26  
27  
28  
29  
30  
31  
32  
33  
34  
35  
36  
37  
38  
39  
40  
41  
42  
43  
44  
45  
46  
47  
48  
49  
50  
51  
52  
53  
54  
55  
56  
57  
58  
59  
60

## REFERENCES

1. Ministry of Health. (2010) Annual Report on Health Statistics. Beijing: Peking Union Medical College Publishing House.
2. China CDC & China News. (2011) Salt reduction and hypertension prevention. China
3. Brown IJ, Tzoulaki I, Candeias V, et al. (2009) Salt intakes around the world: implications for public health international. *Int J Epidemiol* 38, 791–813.
4. He FJ, MacGregor GA. (2009) A comprehensive review on salt and health and current experience of worldwide salt reduction programs. *J Hum Hypertens* 23, 363–384.
5. Hoffmann IS, Cubeddu LX. (2009) Salt and the metabolic syndrome. *Nutr Metab Cardiovasc Dis* 19, 123–128.
6. Strazzullo P, D’Elia L, Kandala NB, et al. (2009) Salt intake, stroke and cardiovascular disease: meta-analysis of prospective studies. *BMJ* 339, b4567.
7. Bibbins-Domingo K, Chertow GM, Coxson PG, et al. (2010) Projected effect of dietary salt reductions on future cardiovascular disease. *N Engl J Med* 362, 590–599.
9. Beaglehole R, Bonita R, Horton R, et al. (2011) Priority actions for the non-communicable disease crisis. *Lancet* 377: 1438-1447.
10. Chan WG. Salt reduction initiatives in developed countries and lessons for China: a systematic review. Available at <http://hdl.handle.net/10722/145711>. Accessed 15 August 2012.
11. Centers for Disease Control and Prevention. (2012) CDC Grand Rounds: Dietary sodium reduction-time for choice. *MMWR*: 61(05), 89-91.
12. Anderson CA, Appel LJ, Okuda N, et al. (2010) Dietary source of sodium in China, Japan, the United Kingdom, the United States, women and men aged 40 to 59 years: the

1  
2  
3  
4  
5  
6  
7  
8 INTERMAP study. *Journal of the American Dietetic Association* 110(5): 736-745.

9  
10 13. Hunter D. (1998) Biochemical indicators of dietary intake. In *Nutritional*  
11 *Epidemiology*, pp. 174–243 [W Willett, editor]. Oxford: Oxford University Press.

12  
13 14. Longjian LIU, Katsumi IKEDA, and Yukio YAMORI. (2000) Twenty-four Hour  
14 *Urinary Sodium and 3-Methylhistidine Excretion in Relation to Blood pressure in*  
15 *Chinese: Results from the China-Japan Cooperative Research for the WHO-CARDIAC*  
16 *study*. *Hypertens Res* 23, 152-157.

17  
18 15. National Centre for Social Research. An assessment of dietary sodium levels among  
19 *adults (aged 19–64) in the UK general population in 2008, based on analysis of dietary*  
20 *sodium in 24 hour urine samples*. UK: Food Standards Agency, 2008.

21  
22 16. Rose G, Stamler J. The INTERSALT Study: background, methods and main results. *J*  
23 *Hum Hypertens* 1989; 3:283–88.

24  
25 17. Stamler J, Elliott P, Chan Q, for the INTERMAP Research Group (2003b).  
26 *INTERMAP appendix tables*. *J Hum Hypertens*, 17:655–775.

27  
28 18 WHO Expert Committee (1982) *Prevention of Coronary Heart Disease*. WHO  
29 *Technical Report Series no. 678*. Geneva: WHO.

30  
31 19. Chinese Nutrition Society (2007). *The Dietary Guidelines for Chinese Residents*. Tibet,  
32 *China: Tibetan People's Publishing House*, 55.

33  
34 20. Zhou BF, Stamler J, Dennis B, et al. (2003) INTERMAP Research Group *Nutrient*  
35 *intakes of middle-aged men and women in China, Japan, United Kingdom, and United*  
36 *States in the late 1990s: the INTERMAP Study*. *J Hum Hypertens* 17, 623–630.

37  
38 21. Liu L, Liu L, Ding Y, et al. (2001) Ethnic and environmental differences in various  
39 *markers of dietary intake and blood pressure among Chinese Han and three other*  
40  
41  
42  
43  
44  
45  
46  
47  
48  
49  
50  
51  
52  
53  
54  
55  
56  
57  
58  
59  
60

Formatted: French (France)

Formatted: French (France)

- 1  
2  
3  
4  
5  
6  
7  
8 minority peoples of China: results from the WHO Cardiovascular Diseases and  
9 Alimentary Comparison (CARDIAC) Study. *Hypertens Res ClinExp* 24, 315–322.  
10  
11  
12 22. Hoffmann IS & Cubeddu LX (2009) Salt and the metabolic syndrome.  
13 *NutrMetabCardiovasc Dis* 19, 123–128.  
14  
15  
16 23. Luft FC (1998) Salt and hypertension at the close of the  
17 millenium. *WienKlinWochenschr* 110, 459–466.  
18  
19  
20 24. Hooper L, Bartlett C, Davey Smith G, et al. (2003) Reduced dietary salt for  
21 prevention of cardiovascular disease. *The Cochrane Database of Systematic Reviews*  
22 2003, issue 3 CD003656.  
23  
24  
25  
26 25. Li N, Yan LL, Niu W, et al. (2013) A large-scale cluster randomized trial to determine  
27 the effects of community-based dietary sodium reduction--the China Rural Health  
28 Initiative Sodium Reduction Study. *Am Heart J*.166(5):815-22.  
29  
30  
31  
32 26. YAN Li, LI Yan, WU Yang-fen. (2011) Reducing salt intake for hypertension control:  
33 related evidence and recommendation on strategies in China. *Chin J Epidemiol*  
34  
35 32(12):1188-1191.  
36  
37  
38  
39  
40  
41  
42  
43  
44  
45  
46  
47  
48  
49  
50  
51  
52  
53  
54  
55  
56  
57  
58  
59  
60

Formatted: Left

**Table 1** ~~Test of goodness of fit between~~ Distribution of including-included and excluding-excluded study populations subjects

| Gender | Including sample |       |       |       |       |       | Excluding sample       |              |                         |              |                         |              |
|--------|------------------|-------|-------|-------|-------|-------|------------------------|--------------|-------------------------|--------------|-------------------------|--------------|
|        | Total            |       | Urban |       | Rural |       | Total                  |              | Urban                   |              | Rural                   |              |
|        | n                | %     | n     | %     | n     | %     | n                      | %            | n                       | %            | n                       | %            |
| Male   | 1076             | 52.21 | 342   | 16.59 | 734   | 35.61 | <del>652</del><br>54.9 | <u>52.85</u> | <del>187</del><br>13.73 | <u>14.63</u> | <del>472</del><br>34.15 | <u>38.21</u> |
| Female | 985              | 47.79 | 311   | 15.09 | 674   | 32.7  | <del>582</del><br>45.1 | <u>47.15</u> | <del>248</del><br>15.69 | <u>19.51</u> | <del>341</del><br>29.41 | <u>27.64</u> |
| Total  | 2061             | 100   | 653   | 31.68 | 1408  | 68.32 | <del>1235</del><br>100 | <u>100</u>   | <del>421</del><br>29.41 | <u>34.15</u> | <del>813</del><br>70.59 | <u>65.85</u> |



Table 2 Personal characteristics of the study sample by sex and age

|                          | Total(n=2061) |       |        | Male(n=1076) |       |        | Female(n=985) |       |        |
|--------------------------|---------------|-------|--------|--------------|-------|--------|---------------|-------|--------|
|                          | Mean          | SD    | Median | Mean         | SD    | Median | Mean          | SD    | Median |
| Age(years)               | 41.23         | 13.99 | 39.00  | 41.12        | 14.32 | 39.00  | 41.34         | 13.62 | 39.00  |
| Height(cm)               | 163.00        | 8.84  | 162.60 | 168.78       | 7.02  | 169.20 | 157.27        | 6.23  | 157.20 |
| BMI (kg/m <sup>2</sup> ) | 24.53         | 3.90  | 24.22  | 24.55        | 3.90  | 24.25  | 24.51         | 3.90  | 24.15  |
| Overweight (%)           | 33.72         |       |        | 34.67        |       |        | 32.69         |       |        |
| Obese (%)                | 18.00         |       |        | 18.03        |       |        | 17.97         |       |        |
| Income (Yuan,%)          |               |       |        |              |       |        |               |       |        |
| <5000                    | 52.24         |       |        | 51.1         |       |        | 53.45         |       |        |
| 5000-                    | 30.66         |       |        | 31.4         |       |        | 29.87         |       |        |
| 10000-                   | 8.35          |       |        | 8.27         |       |        | 8.44          |       |        |
| 15000-                   | 5.45          |       |        | 5.64         |       |        | 5.25          |       |        |
| 20000-                   | 3.29          |       |        | 3.57         |       |        | 2.99          |       |        |
| Education (%)            |               |       |        |              |       |        |               |       |        |
| illiteracy               | 13.79         |       |        | 7.72         |       |        | 20.43         |       |        |
| junior                   | 19.09         |       |        | 17.58        |       |        | 20.73         |       |        |
| junior high              | 42.06         |       |        | 47.72        |       |        | 35.87         |       |        |
| senior                   | 15.15         |       |        | 16.84        |       |        | 13.31         |       |        |
| junior college or above  | 9.91          |       |        | 10.14        |       |        | 9.65          |       |        |

**Table3 Urinary sodium excretion of Shandong adults aged 18-69 in 2011****(Weighted mean,SD, 95% CI, mmol/24h)**

| Gender | Age-group       | Urban |        |       |        |        | Rural |        |       |        |        | Total |        |      |        |        |
|--------|-----------------|-------|--------|-------|--------|--------|-------|--------|-------|--------|--------|-------|--------|------|--------|--------|
|        |                 | N     | Mean   | SD    | 95%CI  | 95%CI  | N     | Mean   | SD    | 95%CI  | 95%CI  | N     | Mean   | SD   | 95%CI  |        |
| Male   | 18-29           | 85    | 241.64 | 18.23 | 194.77 | 288.51 | 196   | 244.81 | 9.85  | 222.52 | 267.10 | 281   | 243.88 | 8.72 | 225.17 | 262.58 |
|        | 30-39           | 91    | 255.88 | 12.30 | 224.25 | 287.50 | 185   | 247.19 | 9.72  | 225.21 | 269.17 | 276   | 249.99 | 7.79 | 233.30 | 266.69 |
|        | 40-49           | 65    | 233.33 | 17.89 | 187.35 | 279.31 | 139   | 247.90 | 7.48  | 230.99 | 264.82 | 204   | 243.59 | 7.40 | 227.72 | 259.47 |
|        | 50-59           | 51    | 263.00 | 12.72 | 230.28 | 295.71 | 111   | 251.36 | 12.64 | 222.78 | 279.95 | 162   | 255.27 | 9.44 | 235.02 | 275.52 |
|        | 60-69           | 50    | 239.00 | 14.74 | 201.12 | 276.88 | 103   | 232.24 | 12.62 | 203.69 | 260.79 | 153   | 234.42 | 9.82 | 213.36 | 255.49 |
|        | <b>Subtotal</b> | 342   | 246.81 | 12.46 | 214.77 | 278.85 | 734   | 245.96 | 8.22  | 227.38 | 264.55 | 1076  | 246.23 | 6.87 | 231.49 | 260.96 |
| Female | 18-29           | 79    | 200.77 | 13.37 | 166.40 | 235.14 | 173   | 225.93 | 7.26  | 209.51 | 242.35 | 252   | 219.01 | 6.69 | 204.66 | 233.37 |
|        | 30-39           | 79    | 236.43 | 8.99  | 213.31 | 259.54 | 165   | 234.70 | 9.62  | 212.94 | 256.46 | 244   | 235.27 | 7.11 | 220.01 | 250.53 |
|        | 40-49           | 59    | 236.92 | 12.94 | 203.65 | 270.18 | 131   | 231.88 | 12.22 | 204.25 | 259.52 | 190   | 233.46 | 9.43 | 213.24 | 253.69 |
|        | 50-59           | 53    | 213.23 | 10.24 | 186.91 | 239.54 | 111   | 245.28 | 11.41 | 219.48 | 271.09 | 164   | 234.73 | 8.73 | 216.01 | 253.45 |
|        | 60-69           | 41    | 200.29 | 11.23 | 171.42 | 229.15 | 94    | 221.79 | 7.72  | 204.32 | 239.26 | 135   | 215.48 | 6.34 | 201.88 | 229.07 |
|        | <b>Subtotal</b> | 311   | 219.97 | 9.07  | 196.66 | 243.29 | 674   | 232.32 | 7.72  | 214.85 | 249.79 | 985   | 228.52 | 5.99 | 215.67 | 241.37 |
| Total  | 18-29           | 164   | 222.94 | 10.65 | 195.56 | 250.32 | 369   | 235.72 | 7.63  | 218.46 | 252.98 | 533   | 232.08 | 6.15 | 218.89 | 245.26 |
|        | 30-39           | 170   | 246.19 | 9.86  | 220.85 | 271.54 | 350   | 241.06 | 9.11  | 220.44 | 261.68 | 520   | 242.73 | 6.98 | 227.75 | 257.71 |
|        | 40-49           | 124   | 235.11 | 12.06 | 204.10 | 266.11 | 270   | 240.30 | 8.95  | 220.05 | 260.56 | 394   | 238.72 | 7.16 | 223.37 | 254.07 |
|        | 50-59           | 104   | 238.44 | 7.54  | 219.05 | 257.83 | 222   | 248.32 | 9.26  | 227.36 | 269.27 | 326   | 245.03 | 6.68 | 230.70 | 259.37 |
|        | 60-69           | 91    | 220.68 | 12.40 | 188.80 | 252.56 | 197   | 226.94 | 8.61  | 207.45 | 246.43 | 288   | 225.01 | 7.05 | 209.89 | 240.14 |
|        | <b>Subtotal</b> | 653   | 233.82 | 9.90  | 208.36 | 259.28 | 1408  | 239.30 | 7.52  | 222.28 | 256.33 | 2061  | 237.61 | 5.98 | 224.77 | 250.44 |

Table 4 Salt intake of Shandong adults aged 18-69 in 2011

(Weighted mean, SD, 95% CI, grams/24h)

| Gender | Age-group       | Urban |       |      |       |       | Rural |       |      |       |       | Total |       |      |       |       |
|--------|-----------------|-------|-------|------|-------|-------|-------|-------|------|-------|-------|-------|-------|------|-------|-------|
|        |                 | N     | Mean  | SD   | 95%CI |       | N     | Mean  | SD   | 95%CI |       | N     | Mean  | SD   | 95%CI |       |
| Male   | 18-29           | 85    | 14.14 | 1.07 | 11.39 | 16.88 | 196   | 14.32 | 0.58 | 13.02 | 15.63 | 281   | 14.27 | 0.51 | 13.17 | 15.36 |
|        | 30-39           | 91    | 14.97 | 0.72 | 13.12 | 16.82 | 185   | 14.46 | 0.57 | 13.17 | 15.75 | 276   | 14.62 | 0.46 | 13.65 | 15.60 |
|        | 40-49           | 65    | 13.65 | 1.05 | 10.96 | 16.34 | 139   | 14.50 | 0.44 | 13.51 | 15.49 | 204   | 14.25 | 0.43 | 13.32 | 15.18 |
|        | 50-59           | 51    | 15.39 | 0.74 | 13.47 | 17.30 | 111   | 14.70 | 0.74 | 13.03 | 16.38 | 162   | 14.93 | 0.55 | 13.75 | 16.12 |
|        | 60-69           | 50    | 13.98 | 0.86 | 11.77 | 16.20 | 103   | 13.59 | 0.74 | 11.92 | 15.26 | 153   | 13.71 | 0.57 | 12.48 | 14.95 |
|        | <b>Subtotal</b> | 342   | 14.44 | 0.73 | 12.56 | 16.31 | 734   | 14.39 | 0.48 | 13.30 | 15.48 | 1076  | 14.40 | 0.40 | 13.54 | 15.27 |
| Female | 18-29           | 79    | 11.75 | 0.78 | 9.73  | 13.76 | 173   | 13.22 | 0.42 | 12.26 | 14.18 | 252   | 12.81 | 0.39 | 11.97 | 13.65 |
|        | 30-39           | 79    | 13.83 | 0.53 | 12.48 | 15.18 | 165   | 13.73 | 0.56 | 12.46 | 15.00 | 244   | 13.76 | 0.42 | 12.87 | 14.66 |
|        | 40-49           | 59    | 13.86 | 0.76 | 11.91 | 15.81 | 131   | 13.57 | 0.71 | 11.95 | 15.18 | 190   | 13.66 | 0.55 | 12.47 | 14.84 |
|        | 50-59           | 53    | 12.47 | 0.60 | 10.93 | 14.01 | 111   | 14.35 | 0.67 | 12.84 | 15.86 | 164   | 13.73 | 0.51 | 12.64 | 14.83 |
|        | 60-69           | 41    | 11.72 | 0.66 | 10.03 | 13.41 | 94    | 12.97 | 0.45 | 11.95 | 14.00 | 135   | 12.61 | 0.37 | 11.81 | 13.40 |
|        | <b>Subtotal</b> | 311   | 12.87 | 0.53 | 11.50 | 14.23 | 674   | 13.59 | 0.45 | 12.57 | 14.61 | 985   | 13.37 | 0.35 | 12.62 | 14.12 |
| Total  | 18-29           | 164   | 13.04 | 0.62 | 11.44 | 14.64 | 369   | 13.79 | 0.45 | 12.78 | 14.80 | 533   | 13.58 | 0.36 | 12.81 | 14.35 |
|        | 30-39           | 170   | 14.40 | 0.58 | 12.92 | 15.89 | 350   | 14.10 | 0.53 | 12.90 | 15.31 | 520   | 14.20 | 0.41 | 13.32 | 15.08 |
|        | 40-49           | 124   | 13.75 | 0.71 | 11.94 | 15.57 | 270   | 14.06 | 0.52 | 12.87 | 15.24 | 394   | 13.97 | 0.42 | 13.07 | 14.86 |
|        | 50-59           | 104   | 13.95 | 0.44 | 12.81 | 15.08 | 222   | 14.53 | 0.54 | 13.30 | 15.75 | 326   | 14.33 | 0.39 | 13.50 | 15.17 |
|        | 60-69           | 91    | 12.91 | 0.73 | 11.05 | 14.77 | 197   | 13.28 | 0.50 | 12.14 | 14.42 | 288   | 13.16 | 0.41 | 12.28 | 14.05 |
|        | <b>Subtotal</b> | 653   | 13.68 | 0.58 | 12.19 | 15.17 | 1408  | 14.00 | 0.44 | 13.00 | 15.00 | 2061  | 13.90 | 0.35 | 13.15 | 14.65 |
